# Supplementary material for: Molecular subtyping of esophageal squamous cell carcinoma by large-scale transcriptional profiling: Characterization, therapeutic targets, and prognostic value
Source: Front Genet. 2022 Nov 8;13:1033214. doi: 10.3389/fgene.2022.1033214 (PMC9678939; doi:10.3389/fgene.2022.1033214)
Supplement: Supplementary file 1 [file Table2.XLSX]

## Sheet: Supplementary file 2
The information of co-expressed network modules
	gene	module	color
A1CF	A1CF	1	turquoise
A2M	A2M	0	grey
A4GALT	A4GALT	0	grey
A4GNT	A4GNT	1	turquoise
AAAS	AAAS	0	grey
AACS	AACS	0	grey
AADAC	AADAC	0	grey
AAGAB	AAGAB	0	grey
AAK1	AAK1	1	turquoise
AAMDC	AAMDC	1	turquoise
AAMP	AAMP	0	grey
AANAT	AANAT	0	grey
AAR2	AAR2	1	turquoise
AARS	AARS	1	turquoise
AARSD1 /// PTGES3L /// PTGES3L-AARSD1	AARSD1 /// PTGES3L /// PTGES3L-AARSD1	1	turquoise
AASDHPPT	AASDHPPT	0	grey
AASS	AASS	0	grey
AATF	AATF	1	turquoise
AATK	AATK	0	grey
ABAT	ABAT	1	turquoise
ABCA1	ABCA1	1	turquoise
ABCA11P	ABCA11P	0	grey
ABCA12	ABCA12	2	blue
ABCA2	ABCA2	0	grey
ABCA3	ABCA3	0	grey
ABCA4	ABCA4	0	grey
ABCA5	ABCA5	1	turquoise
ABCA6	ABCA6	2	blue
ABCA7	ABCA7	0	grey
ABCA8	ABCA8	1	turquoise
ABCB1	ABCB1	2	blue
ABCB1 /// ABCB4	ABCB1 /// ABCB4	2	blue
ABCB11	ABCB11	0	grey
ABCB4	ABCB4	0	grey
ABCB6	ABCB6	0	grey
ABCB7	ABCB7	0	grey
ABCB8	ABCB8	0	grey
ABCB8 /// ASIC3	ABCB8 /// ASIC3	0	grey
ABCB9	ABCB9	0	grey
ABCC1	ABCC1	1	turquoise
ABCC10	ABCC10	0	grey
ABCC2	ABCC2	0	grey
ABCC3	ABCC3	0	grey
ABCC4	ABCC4	1	turquoise
ABCC5	ABCC5	1	turquoise
ABCC6 /// ABCC6P1 /// ABCC6P2 /// LOC101930322	ABCC6 /// ABCC6P1 /// ABCC6P2 /// LOC101930322	0	grey
ABCC6 /// LOC101930322	ABCC6 /// LOC101930322	0	grey
ABCC8	ABCC8	0	grey
ABCC9	ABCC9	0	grey
ABCD1	ABCD1	0	grey
ABCD1P2 /// ABCD1P2	ABCD1P2 /// ABCD1P2	0	grey
ABCD2	ABCD2	0	grey
ABCD3	ABCD3	1	turquoise
ABCD4	ABCD4	0	grey
ABCE1	ABCE1	1	turquoise
ABCF1	ABCF1	1	turquoise
ABCF2	ABCF2	1	turquoise
ABCF3	ABCF3	1	turquoise
ABCG1	ABCG1	1	turquoise
ABCG2	ABCG2	0	grey
ABCG4	ABCG4	1	turquoise
ABCG5	ABCG5	1	turquoise
ABHD10	ABHD10	1	turquoise
ABHD11	ABHD11	0	grey
ABHD14A-ACY1 /// ACY1	ABHD14A-ACY1 /// ACY1	0	grey
ABHD14A /// ACY1	ABHD14A /// ACY1	0	grey
ABHD17A	ABHD17A	1	turquoise
ABHD17B	ABHD17B	1	turquoise
ABHD2	ABHD2	0	grey
ABHD3	ABHD3	0	grey
ABHD4	ABHD4	0	grey
ABHD5	ABHD5	1	turquoise
ABHD6	ABHD6	0	grey
ABHD8	ABHD8	0	grey
ABI1	ABI1	1	turquoise
ABI2	ABI2	1	turquoise
ABI3BP	ABI3BP	1	turquoise
ABL1	ABL1	0	grey
ABL2	ABL2	1	turquoise
ABLIM1	ABLIM1	1	turquoise
ABLIM3	ABLIM3	1	turquoise
ABO	ABO	0	grey
abParts /// IGKC /// IGKV4-1 /// IGKV4-1	abParts /// IGKC /// IGKV4-1 /// IGKV4-1	7	black
ABR	ABR	1	turquoise
ABT1	ABT1	0	grey
ABTB2	ABTB2	0	grey
AC002310.7 /// ZNF785	AC002310.7 /// ZNF785	0	grey
AC003989.4	AC003989.4	0	grey
AC004490.1 /// AX746733	AC004490.1 /// AX746733	0	grey
AC004692.5	AC004692.5	0	grey
AC004941.5	AC004941.5	0	grey
AC005838.2	AC005838.2	0	grey
AC007292.3	AC007292.3	1	turquoise
AC007389.3	AC007389.3	0	grey
AC007967.3 /// RBMY2TP /// RBMY2TP	AC007967.3 /// RBMY2TP /// RBMY2TP	1	turquoise
AC009237.8 /// AK055967	AC009237.8 /// AK055967	0	grey
AC009947.3 /// RBMY2AP /// RBMY2AP /// RBMY2BP /// RBMY2BP /// RBMY2DP /// RBMY2DP	AC009947.3 /// RBMY2AP /// RBMY2AP /// RBMY2BP /// RBMY2BP /// RBMY2DP /// RBMY2DP	1	turquoise
AC012065.7	AC012065.7	1	turquoise
AC068039.4	AC068039.4	0	grey
AC074212.6	AC074212.6	0	grey
AC084219.3	AC084219.3	0	grey
AC104537.2 /// TCEB1P28	AC104537.2 /// TCEB1P28	0	grey
AC128677.4 /// CH17-132F21.1 /// IGKV1OR-1 /// IGKV1OR-1 /// IGKV1OR10-1 /// IGKV1OR10-1 /// IGKV1OR2-2	AC128677.4 /// CH17-132F21.1 /// IGKV1OR-1 /// IGKV1OR-1 /// IGKV1OR10-1 /// IGKV1OR10-1 /// IGKV1OR2-2	7	black
ACAA1	ACAA1	1	turquoise
ACAA2	ACAA2	1	turquoise
ACACA	ACACA	1	turquoise
ACACB	ACACB	1	turquoise
ACAD10	ACAD10	0	grey
ACAD8	ACAD8	1	turquoise
ACADL	ACADL	0	grey
ACADM	ACADM	1	turquoise
ACADS	ACADS	0	grey
ACADSB	ACADSB	2	blue
ACADVL	ACADVL	1	turquoise
ACAN	ACAN	0	grey
ACAP1	ACAP1	6	red
ACAP2	ACAP2	0	grey
ACAT1	ACAT1	1	turquoise
ACAT2	ACAT2	0	grey
ACBD3	ACBD3	0	grey
ACBD4	ACBD4	1	turquoise
ACD	ACD	1	turquoise
ACE	ACE	0	grey
ACE2	ACE2	1	turquoise
ACHE	ACHE	0	grey
ACIN1	ACIN1	1	turquoise
ACKR1	ACKR1	1	turquoise
ACKR2	ACKR2	0	grey
ACKR3	ACKR3	1	turquoise
ACKR4	ACKR4	0	grey
ACLY	ACLY	1	turquoise
ACN9	ACN9	1	turquoise
ACO1	ACO1	0	grey
ACO2	ACO2	0	grey
ACOT1 /// ACOT2	ACOT1 /// ACOT2	0	grey
ACOT11	ACOT11	1	turquoise
ACOT13	ACOT13	1	turquoise
ACOT7	ACOT7	1	turquoise
ACOT8	ACOT8	0	grey
ACOT9	ACOT9	1	turquoise
ACOX1	ACOX1	1	turquoise
ACOX2	ACOX2	1	turquoise
ACOX3	ACOX3	1	turquoise
ACOXL	ACOXL	0	grey
ACP1	ACP1	1	turquoise
ACP2	ACP2	1	turquoise
ACP5	ACP5	2	blue
ACP6	ACP6	1	turquoise
ACPP	ACPP	1	turquoise
ACR	ACR	0	grey
ACRV1	ACRV1	0	grey
ACSBG1	ACSBG1	0	grey
ACSBG2	ACSBG2	0	grey
ACSF2	ACSF2	1	turquoise
ACSL1	ACSL1	0	grey
ACSL3	ACSL3	1	turquoise
ACSL4	ACSL4	1	turquoise
ACSL5	ACSL5	1	turquoise
ACSL6	ACSL6	0	grey
ACSM1	ACSM1	0	grey
ACSM2A /// ACSM2B	ACSM2A /// ACSM2B	0	grey
ACSM3	ACSM3	5	green
ACSM5	ACSM5	0	grey
ACSS3	ACSS3	2	blue
ACTA1	ACTA1	0	grey
ACTA2	ACTA2	2	blue
ACTB	ACTB	0	grey
ACTB /// ACTG1	ACTB /// ACTG1	0	grey
ACTBP9 /// ACTBP9	ACTBP9 /// ACTBP9	0	grey
ACTC1	ACTC1	2	blue
ACTG1P4 /// AMY1A /// AMY1B /// AMY1C /// AMY2A /// AMY2B	ACTG1P4 /// AMY1A /// AMY1B /// AMY1C /// AMY2A /// AMY2B	2	blue
ACTG2	ACTG2	2	blue
ACTL6A	ACTL6A	1	turquoise
ACTL6B	ACTL6B	0	grey
ACTL7A	ACTL7A	0	grey
ACTL7B	ACTL7B	0	grey
ACTL8	ACTL8	0	grey
ACTN1	ACTN1	1	turquoise
ACTN2	ACTN2	0	grey
ACTN3	ACTN3	1	turquoise
ACTN4	ACTN4	0	grey
ACTR10	ACTR10	0	grey
ACTR1A	ACTR1A	1	turquoise
ACTR1B	ACTR1B	0	grey
ACTR2	ACTR2	0	grey
ACTR3	ACTR3	0	grey
ACTR3B	ACTR3B	1	turquoise
ACTR3P2 /// ACTR3P2	ACTR3P2 /// ACTR3P2	0	grey
ACTR5	ACTR5	1	turquoise
ACTR6	ACTR6	0	grey
ACTR8	ACTR8	1	turquoise
ACVR1	ACVR1	1	turquoise
ACVR1B	ACVR1B	0	grey
ACVR2A	ACVR2A	2	blue
ACVR2B	ACVR2B	0	grey
ACVR2B-AS1	ACVR2B-AS1	0	grey
ACVRL1	ACVRL1	1	turquoise
ACYP1	ACYP1	1	turquoise
ACYP2 /// LOC101927144	ACYP2 /// LOC101927144	1	turquoise
ADA	ADA	1	turquoise
ADAM10	ADAM10	1	turquoise
ADAM11	ADAM11	0	grey
ADAM12	ADAM12	1	turquoise
ADAM15	ADAM15	0	grey
ADAM17	ADAM17	1	turquoise
ADAM18	ADAM18	0	grey
ADAM19	ADAM19	0	grey
ADAM2	ADAM2	0	grey
ADAM20	ADAM20	0	grey
ADAM21	ADAM21	0	grey
ADAM22	ADAM22	0	grey
ADAM23	ADAM23	1	turquoise
ADAM28	ADAM28	0	grey
ADAM29 /// LOC101928551	ADAM29 /// LOC101928551	0	grey
ADAM30	ADAM30	0	grey
ADAM3A	ADAM3A	0	grey
ADAM3B /// ADAM3B	ADAM3B /// ADAM3B	0	grey
ADAM5	ADAM5	0	grey
ADAM7	ADAM7	0	grey
ADAM8	ADAM8	1	turquoise
ADAM9	ADAM9	0	grey
ADAMDEC1	ADAMDEC1	3	brown
ADAMTS1	ADAMTS1	9	magenta
ADAMTS12	ADAMTS12	2	blue
ADAMTS13	ADAMTS13	0	grey
ADAMTS2	ADAMTS2	2	blue
ADAMTS20	ADAMTS20	0	grey
ADAMTS3	ADAMTS3	0	grey
ADAMTS5	ADAMTS5	2	blue
ADAMTS6	ADAMTS6	0	grey
ADAMTS7	ADAMTS7	0	grey
ADAMTS8	ADAMTS8	2	blue
ADAMTS9	ADAMTS9	0	grey
ADAMTSL2	ADAMTSL2	0	grey
ADAMTSL3	ADAMTSL3	1	turquoise
ADAMTSL4	ADAMTSL4	1	turquoise
ADAP1	ADAP1	0	grey
ADAP2	ADAP2	1	turquoise
ADAR	ADAR	1	turquoise
ADARB1	ADARB1	1	turquoise
ADARB2	ADARB2	0	grey
ADAT1	ADAT1	1	turquoise
ADCK2	ADCK2	0	grey
ADCK3	ADCK3	0	grey
ADCK4	ADCK4	0	grey
ADCY1	ADCY1	0	grey
ADCY10	ADCY10	0	grey
ADCY2	ADCY2	0	grey
ADCY3	ADCY3	1	turquoise
ADCY6	ADCY6	1	turquoise
ADCY7	ADCY7	0	grey
ADCY8	ADCY8	0	grey
ADCY9	ADCY9	0	grey
ADCYAP1	ADCYAP1	0	grey
ADCYAP1R1	ADCYAP1R1	0	grey
ADD1	ADD1	1	turquoise
ADD2	ADD2	0	grey
ADD3	ADD3	0	grey
ADD3-AS1	ADD3-AS1	2	blue
ADGB	ADGB	0	grey
ADH1A	ADH1A	0	grey
ADH1B	ADH1B	1	turquoise
ADH1C	ADH1C	0	grey
ADH5	ADH5	0	grey
ADH6	ADH6	1	turquoise
ADH7	ADH7	1	turquoise
ADI1	ADI1	0	grey
ADIPOQ	ADIPOQ	0	grey
ADIPOR1	ADIPOR1	1	turquoise
ADIPOR2	ADIPOR2	1	turquoise
ADIRF	ADIRF	1	turquoise
ADK	ADK	1	turquoise
ADM	ADM	0	grey
ADM2	ADM2	0	grey
ADNP	ADNP	0	grey
ADNP2	ADNP2	0	grey
ADO	ADO	1	turquoise
ADORA1	ADORA1	0	grey
ADORA2A /// SPECC1L-ADORA2A	ADORA2A /// SPECC1L-ADORA2A	0	grey
ADORA2B	ADORA2B	1	turquoise
ADORA3	ADORA3	0	grey
ADPGK	ADPGK	1	turquoise
ADPRH	ADPRH	0	grey
ADPRM	ADPRM	0	grey
ADRA1A	ADRA1A	0	grey
ADRA1B	ADRA1B	0	grey
ADRA1D	ADRA1D	1	turquoise
ADRA2A	ADRA2A	0	grey
ADRA2B	ADRA2B	0	grey
ADRA2C	ADRA2C	0	grey
ADRB1	ADRB1	0	grey
ADRB2	ADRB2	0	grey
ADRB3	ADRB3	0	grey
ADRBK1	ADRBK1	0	grey
ADRBK2	ADRBK2	0	grey
ADRM1	ADRM1	1	turquoise
ADSL	ADSL	1	turquoise
ADSS	ADSS	1	turquoise
ADTRP	ADTRP	0	grey
AEBP1	AEBP1	8	pink
AEN	AEN	1	turquoise
AES	AES	1	turquoise
AF007147	AF007147	1	turquoise
AF070581	AF070581	0	grey
AF090939	AF090939	1	turquoise
AF198444	AF198444	0	grey
AFAP1	AFAP1	0	grey
AFF1	AFF1	1	turquoise
AFF2	AFF2	0	grey
AFF3	AFF3	2	blue
AFF4	AFF4	1	turquoise
AFG3L2	AFG3L2	0	grey
AFM	AFM	0	grey
AFP	AFP	0	grey
AFTPH	AFTPH	1	turquoise
AGA	AGA	1	turquoise
AGAP1	AGAP1	0	grey
AGAP10 /// AGAP11 /// AGAP4 /// AGAP5 /// AGAP9 /// BMS1P5 /// CTGLF12P /// LOC101060581	AGAP10 /// AGAP11 /// AGAP4 /// AGAP5 /// AGAP9 /// BMS1P5 /// CTGLF12P /// LOC101060581	0	grey
AGAP11 /// AGAP4 /// AGAP6 /// AGAP7P /// CTGLF12P /// LOC101060581	AGAP11 /// AGAP4 /// AGAP6 /// AGAP7P /// CTGLF12P /// LOC101060581	0	grey
AGAP2	AGAP2	0	grey
AGBL2	AGBL2	0	grey
AGBL3	AGBL3	0	grey
AGBL5	AGBL5	0	grey
AGER	AGER	0	grey
AGFG1	AGFG1	0	grey
AGFG2	AGFG2	1	turquoise
AGGF1	AGGF1	0	grey
AGK	AGK	1	turquoise
AGL	AGL	0	grey
AGMAT	AGMAT	1	turquoise
AGO1	AGO1	1	turquoise
AGO2 /// CASC7 /// CASC7 /// DQ574852	AGO2 /// CASC7 /// CASC7 /// DQ574852	1	turquoise
AGO3	AGO3	0	grey
AGO4	AGO4	1	turquoise
AGPAT1	AGPAT1	0	grey
AGPAT2	AGPAT2	1	turquoise
AGPAT3	AGPAT3	0	grey
AGPAT4	AGPAT4	0	grey
AGPAT5	AGPAT5	1	turquoise
AGPS	AGPS	0	grey
AGR2	AGR2	12	tan
AGRN	AGRN	1	turquoise
AGRP	AGRP	0	grey
AGT	AGT	0	grey
AGTPBP1	AGTPBP1	0	grey
AGTR1	AGTR1	2	blue
AGTR2	AGTR2	0	grey
AGXT	AGXT	0	grey
AHCTF1	AHCTF1	1	turquoise
AHCY	AHCY	0	grey
AHCYL1	AHCYL1	1	turquoise
AHCYL2	AHCYL2	1	turquoise
AHDC1	AHDC1	1	turquoise
AHI1	AHI1	0	grey
AHNAK	AHNAK	1	turquoise
AHNAK2	AHNAK2	0	grey
AHR	AHR	1	turquoise
AHSA1	AHSA1	1	turquoise
AHSA2	AHSA2	0	grey
AHSG	AHSG	1	turquoise
AHSP	AHSP	0	grey
AICDA	AICDA	6	red
AIDA	AIDA	0	grey
AIF1	AIF1	0	grey
AIFM1	AIFM1	13	salmon
AIM1	AIM1	1	turquoise
AIM1L	AIM1L	1	turquoise
AIM2	AIM2	1	turquoise
AIMP1	AIMP1	0	grey
AIMP2	AIMP2	1	turquoise
AIP	AIP	1	turquoise
AIPL1	AIPL1	0	grey
AIRE	AIRE	0	grey
AJ011981 /// DPY19L1	AJ011981 /// DPY19L1	0	grey
AJAP1	AJAP1	0	grey
AK021537	AK021537	0	grey
AK021933	AK021933	0	grey
AK022030 /// TROVE2	AK022030 /// TROVE2	0	grey
AK055981	AK055981	1	turquoise
AK055981 /// RP11-617F23.1	AK055981 /// RP11-617F23.1	1	turquoise
AK096803 /// RP11-395B7.2	AK096803 /// RP11-395B7.2	0	grey
AK1	AK1	0	grey
AK125860 /// RP11-582J16.4	AK125860 /// RP11-582J16.4	0	grey
AK2	AK2	1	turquoise
AK291611 /// TRGV7 /// TRGV7	AK291611 /// TRGV7 /// TRGV7	0	grey
AK4 /// LOC100507855	AK4 /// LOC100507855	1	turquoise
AK5	AK5	0	grey
AK6	AK6	0	grey
AK6 /// TAF9	AK6 /// TAF9	0	grey
AKAP1	AKAP1	0	grey
AKAP10	AKAP10	0	grey
AKAP11	AKAP11	0	grey
AKAP12	AKAP12	2	blue
AKAP13	AKAP13	1	turquoise
AKAP17A	AKAP17A	0	grey
AKAP2 /// PALM2-AKAP2	AKAP2 /// PALM2-AKAP2	0	grey
AKAP3	AKAP3	0	grey
AKAP4	AKAP4	0	grey
AKAP5	AKAP5	0	grey
AKAP6	AKAP6	1	turquoise
AKAP7	AKAP7	1	turquoise
AKAP8	AKAP8	1	turquoise
AKAP8L	AKAP8L	0	grey
AKAP9	AKAP9	1	turquoise
AKIP1	AKIP1	0	grey
AKIP1 /// NUAK2	AKIP1 /// NUAK2	9	magenta
AKIRIN1	AKIRIN1	0	grey
AKR1A1	AKR1A1	1	turquoise
AKR1B1	AKR1B1	1	turquoise
AKR1B10	AKR1B10	0	grey
AKR1C1	AKR1C1	1	turquoise
AKR1C2 /// LOC101930400	AKR1C2 /// LOC101930400	1	turquoise
AKR1C3	AKR1C3	1	turquoise
AKR1C4	AKR1C4	0	grey
AKR1D1	AKR1D1	0	grey
AKR7A2	AKR7A2	1	turquoise
AKR7A3	AKR7A3	5	green
AKT1	AKT1	1	turquoise
AKT2	AKT2	0	grey
AKT3	AKT3	0	grey
AKTIP	AKTIP	1	turquoise
AL109706	AL109706	0	grey
AL590762.11	AL590762.11	1	turquoise
AL928768.3 /// Ig alpha 1-[alpha]2m /// IGH	AL928768.3 /// Ig alpha 1-[alpha]2m /// IGH	6	red
ALAD	ALAD	1	turquoise
ALAS1	ALAS1	1	turquoise
ALAS2	ALAS2	0	grey
ALB	ALB	0	grey
ALCAM	ALCAM	1	turquoise
ALDH18A1	ALDH18A1	0	grey
ALDH1A1	ALDH1A1	0	grey
ALDH1A2	ALDH1A2	0	grey
ALDH1A2 /// LOC101928635	ALDH1A2 /// LOC101928635	2	blue
ALDH1A3	ALDH1A3	1	turquoise
ALDH1B1	ALDH1B1	0	grey
ALDH1L1	ALDH1L1	0	grey
ALDH2	ALDH2	1	turquoise
ALDH3A1	ALDH3A1	1	turquoise
ALDH3A2	ALDH3A2	1	turquoise
ALDH3B1	ALDH3B1	1	turquoise
ALDH3B2	ALDH3B2	1	turquoise
ALDH4A1	ALDH4A1	1	turquoise
ALDH5A1	ALDH5A1	0	grey
ALDH6A1	ALDH6A1	1	turquoise
ALDH7A1	ALDH7A1	1	turquoise
ALDH8A1	ALDH8A1	0	grey
ALDH9A1	ALDH9A1	1	turquoise
ALDOA	ALDOA	0	grey
ALDOAP2	ALDOAP2	0	grey
ALDOB	ALDOB	5	green
ALDOC	ALDOC	0	grey
ALG11 /// UTP14A /// UTP14C	ALG11 /// UTP14A /// UTP14C	13	salmon
ALG11 /// UTP14C	ALG11 /// UTP14C	1	turquoise
ALG12	ALG12	0	grey
ALG13	ALG13	0	grey
ALG3	ALG3	1	turquoise
ALG5	ALG5	0	grey
ALG6	ALG6	0	grey
ALG8	ALG8	11	greenyellow
ALG9	ALG9	1	turquoise
ALK	ALK	1	turquoise
ALKBH1	ALKBH1	1	turquoise
ALKBH4	ALKBH4	1	turquoise
ALLC	ALLC	0	grey
ALMS1	ALMS1	1	turquoise
ALOX12	ALOX12	1	turquoise
ALOX12B	ALOX12B	0	grey
ALOX12P2	ALOX12P2	1	turquoise
ALOX15	ALOX15	0	grey
ALOX15B	ALOX15B	1	turquoise
ALOX5	ALOX5	0	grey
ALOX5AP	ALOX5AP	0	grey
ALOXE3	ALOXE3	0	grey
ALPI	ALPI	0	grey
ALPK1	ALPK1	0	grey
ALPK3	ALPK3	0	grey
ALPL	ALPL	0	grey
ALPP	ALPP	0	grey
ALPP /// ALPPL2	ALPP /// ALPPL2	0	grey
ALPPL2	ALPPL2	0	grey
ALS2CL	ALS2CL	1	turquoise
ALX1	ALX1	0	grey
ALX3	ALX3	0	grey
ALX4	ALX4	0	grey
AMACR	AMACR	1	turquoise
AMACR /// C1QTNF3-AMACR	AMACR /// C1QTNF3-AMACR	1	turquoise
AMBN	AMBN	0	grey
AMBP	AMBP	0	grey
AMBRA1	AMBRA1	0	grey
AMD1	AMD1	0	grey
AMDHD2 /// CEMP1	AMDHD2 /// CEMP1	0	grey
AMELX	AMELX	0	grey
AMELY	AMELY	0	grey
AMFR	AMFR	1	turquoise
AMH /// MIR4321	AMH /// MIR4321	0	grey
AMHR2	AMHR2	0	grey
AMIGO2	AMIGO2	1	turquoise
AMIGO3 /// GMPPB	AMIGO3 /// GMPPB	1	turquoise
AMMECR1	AMMECR1	0	grey
AMN	AMN	0	grey
AMOT	AMOT	0	grey
AMOTL2	AMOTL2	1	turquoise
AMPD1	AMPD1	0	grey
AMPD2	AMPD2	1	turquoise
AMPD3	AMPD3	0	grey
AMPD3 /// CAND1.11	AMPD3 /// CAND1.11	0	grey
AMPH	AMPH	0	grey
AMT	AMT	1	turquoise
AMZ2	AMZ2	1	turquoise
ANAPC1 /// LOC730268	ANAPC1 /// LOC730268	1	turquoise
ANAPC10	ANAPC10	0	grey
ANAPC13	ANAPC13	1	turquoise
ANAPC15	ANAPC15	0	grey
ANAPC2	ANAPC2	0	grey
ANAPC5	ANAPC5	1	turquoise
ANG	ANG	2	blue
ANGEL1	ANGEL1	1	turquoise
ANGEL2	ANGEL2	1	turquoise
ANGPT1	ANGPT1	0	grey
ANGPT2	ANGPT2	2	blue
ANGPT4	ANGPT4	0	grey
ANGPTL2	ANGPTL2	8	pink
ANGPTL3	ANGPTL3	0	grey
ANGPTL4	ANGPTL4	0	grey
ANGPTL7	ANGPTL7	1	turquoise
ANK1	ANK1	0	grey
ANK2	ANK2	1	turquoise
ANK3	ANK3	1	turquoise
ANKEF1	ANKEF1	0	grey
ANKFY1	ANKFY1	0	grey
ANKH	ANKH	0	grey
ANKHD1 /// ANKHD1-EIF4EBP3	ANKHD1 /// ANKHD1-EIF4EBP3	0	grey
ANKHD1 /// ANKHD1-EIF4EBP3 /// EIF4EBP3	ANKHD1 /// ANKHD1-EIF4EBP3 /// EIF4EBP3	1	turquoise
ANKLE2	ANKLE2	1	turquoise
ANKMY1	ANKMY1	0	grey
ANKMY2	ANKMY2	0	grey
ANKRA2	ANKRA2	0	grey
ANKRD1	ANKRD1	0	grey
ANKRD10	ANKRD10	0	grey
ANKRD10-IT1	ANKRD10-IT1	0	grey
ANKRD11	ANKRD11	0	grey
ANKRD12	ANKRD12	1	turquoise
ANKRD17	ANKRD17	0	grey
ANKRD2	ANKRD2	0	grey
ANKRD26	ANKRD26	0	grey
ANKRD27	ANKRD27	0	grey
ANKRD28	ANKRD28	0	grey
ANKRD34C	ANKRD34C	0	grey
ANKRD36	ANKRD36	1	turquoise
ANKRD36B	ANKRD36B	0	grey
ANKRD36BP2	ANKRD36BP2	0	grey
ANKRD40	ANKRD40	0	grey
ANKRD46	ANKRD46	10	purple
ANKRD49	ANKRD49	11	greenyellow
ANKRD53	ANKRD53	0	grey
ANKRD55	ANKRD55	0	grey
ANKRD6	ANKRD6	0	grey
ANKRD7	ANKRD7	0	grey
ANKS1A	ANKS1A	2	blue
ANKS1B	ANKS1B	1	turquoise
ANKZF1	ANKZF1	0	grey
ANO1	ANO1	1	turquoise
ANO10	ANO10	1	turquoise
ANO2	ANO2	0	grey
ANO3	ANO3	0	grey
ANP32A	ANP32A	0	grey
ANP32A-IT1	ANP32A-IT1	0	grey
ANP32B	ANP32B	1	turquoise
ANP32C	ANP32C	0	grey
ANP32D	ANP32D	0	grey
ANP32E	ANP32E	1	turquoise
ANPEP	ANPEP	3	brown
ANTXR1	ANTXR1	8	pink
ANXA1	ANXA1	1	turquoise
ANXA10	ANXA10	5	green
ANXA11	ANXA11	1	turquoise
ANXA13	ANXA13	0	grey
ANXA2	ANXA2	1	turquoise
ANXA2 /// NHP2L1	ANXA2 /// NHP2L1	1	turquoise
ANXA2P1	ANXA2P1	1	turquoise
ANXA2P2	ANXA2P2	1	turquoise
ANXA2P3	ANXA2P3	1	turquoise
ANXA3	ANXA3	1	turquoise
ANXA4	ANXA4	0	grey
ANXA5	ANXA5	1	turquoise
ANXA6	ANXA6	0	grey
ANXA7	ANXA7	0	grey
ANXA8 /// ANXA8L1	ANXA8 /// ANXA8L1	1	turquoise
ANXA9	ANXA9	1	turquoise
AOAH	AOAH	0	grey
AOC1	AOC1	0	grey
AOC2	AOC2	0	grey
AOC3	AOC3	2	blue
AOC4P	AOC4P	0	grey
AOX1	AOX1	2	blue
AP001062.7 /// C21orf2	AP001062.7 /// C21orf2	0	grey
AP1AR	AP1AR	0	grey
AP1B1	AP1B1	1	turquoise
AP1G1	AP1G1	0	grey
AP1G2	AP1G2	1	turquoise
AP1M2	AP1M2	0	grey
AP1S1	AP1S1	1	turquoise
AP1S2	AP1S2	0	grey
AP2A2	AP2A2	0	grey
AP2B1	AP2B1	1	turquoise
AP2M1	AP2M1	1	turquoise
AP2S1	AP2S1	0	grey
AP3B1	AP3B1	1	turquoise
AP3B2	AP3B2	0	grey
AP3D1	AP3D1	0	grey
AP3M2	AP3M2	1	turquoise
AP3S1	AP3S1	1	turquoise
AP3S2 /// C15orf38-AP3S2	AP3S2 /// C15orf38-AP3S2	0	grey
AP4E1	AP4E1	0	grey
AP4M1	AP4M1	0	grey
AP4S1	AP4S1	1	turquoise
AP5M1	AP5M1	0	grey
AP5S1	AP5S1	2	blue
AP5Z1 /// MIR4656	AP5Z1 /// MIR4656	1	turquoise
APAF1	APAF1	0	grey
APBA1	APBA1	0	grey
APBA2	APBA2	0	grey
APBA3	APBA3	1	turquoise
APBB1	APBB1	0	grey
APBB1IP	APBB1IP	0	grey
APBB2	APBB2	1	turquoise
APBB3 /// MIR6831	APBB3 /// MIR6831	0	grey
APC	APC	0	grey
APC2	APC2	0	grey
APCS	APCS	0	grey
APEH	APEH	1	turquoise
APEX1	APEX1	1	turquoise
APEX2	APEX2	1	turquoise
APH1A	APH1A	0	grey
APH1B	APH1B	1	turquoise
API5	API5	0	grey
APIP	APIP	1	turquoise
APITD1 /// APITD1-CORT	APITD1 /// APITD1-CORT	1	turquoise
APLNR	APLNR	0	grey
APLP1	APLP1	0	grey
APLP2	APLP2	0	grey
APMAP	APMAP	1	turquoise
APOA1	APOA1	1	turquoise
APOA2	APOA2	0	grey
APOA4	APOA4	0	grey
APOB	APOB	1	turquoise
APOBEC1	APOBEC1	0	grey
APOBEC2	APOBEC2	5	green
APOBEC3A /// APOBEC3A_B	APOBEC3A /// APOBEC3A_B	0	grey
APOBEC3B	APOBEC3B	1	turquoise
APOBEC3C	APOBEC3C	0	grey
APOBEC3F	APOBEC3F	0	grey
APOBEC3F /// APOBEC3G	APOBEC3F /// APOBEC3G	0	grey
APOBEC3G	APOBEC3G	1	turquoise
APOBR	APOBR	3	brown
APOC1	APOC1	1	turquoise
APOC2 /// APOC4 /// APOC4-APOC2	APOC2 /// APOC4 /// APOC4-APOC2	3	brown
APOC3	APOC3	0	grey
APOD	APOD	2	blue
APOE	APOE	1	turquoise
APOF	APOF	0	grey
APOH	APOH	0	grey
APOL1	APOL1	1	turquoise
APOL2	APOL2	1	turquoise
APOL3	APOL3	0	grey
APOL5	APOL5	1	turquoise
APOL6	APOL6	0	grey
APOLD1	APOLD1	1	turquoise
APOLD1 /// DDX47	APOLD1 /// DDX47	1	turquoise
APOM	APOM	1	turquoise
APOO	APOO	1	turquoise
APOOL	APOOL	1	turquoise
APP	APP	1	turquoise
APPBP2	APPBP2	1	turquoise
APPL1	APPL1	1	turquoise
APPL2	APPL2	0	grey
APRT	APRT	0	grey
APTX	APTX	1	turquoise
AQP1	AQP1	1	turquoise
AQP2	AQP2	0	grey
AQP3	AQP3	1	turquoise
AQP4	AQP4	0	grey
AQP5	AQP5	12	tan
AQP6	AQP6	0	grey
AQP7 /// LOC100509620 /// LOC101930168	AQP7 /// LOC100509620 /// LOC101930168	1	turquoise
AQP8	AQP8	0	grey
AQP9	AQP9	3	brown
AQR	AQR	0	grey
AR	AR	1	turquoise
ARAF	ARAF	0	grey
ARAP1	ARAP1	11	greenyellow
ARAP2 /// LOC101928667	ARAP2 /// LOC101928667	1	turquoise
ARAP3	ARAP3	1	turquoise
ARC	ARC	0	grey
ARCN1	ARCN1	0	grey
AREG	AREG	1	turquoise
AREL1	AREL1	1	turquoise
ARF1 /// MIR3620	ARF1 /// MIR3620	0	grey
ARF1P1 /// ARF1P1	ARF1P1 /// ARF1P1	0	grey
ARF3	ARF3	0	grey
ARF4	ARF4	1	turquoise
ARF5	ARF5	0	grey
ARF6	ARF6	1	turquoise
ARFGAP1	ARFGAP1	1	turquoise
ARFGAP2	ARFGAP2	0	grey
ARFGAP3	ARFGAP3	1	turquoise
ARFGEF1	ARFGEF1	10	purple
ARFGEF2	ARFGEF2	0	grey
ARFIP1	ARFIP1	1	turquoise
ARFIP2	ARFIP2	0	grey
ARFRP1	ARFRP1	0	grey
ARG1	ARG1	1	turquoise
ARG2	ARG2	1	turquoise
ARGLU1	ARGLU1	0	grey
ARHGAP1	ARHGAP1	1	turquoise
ARHGAP10	ARHGAP10	1	turquoise
ARHGAP11A	ARHGAP11A	1	turquoise
ARHGAP12	ARHGAP12	0	grey
ARHGAP15 /// LOC101928361	ARHGAP15 /// LOC101928361	1	turquoise
ARHGAP17	ARHGAP17	1	turquoise
ARHGAP19	ARHGAP19	1	turquoise
ARHGAP22	ARHGAP22	0	grey
ARHGAP24	ARHGAP24	0	grey
ARHGAP25	ARHGAP25	6	red
ARHGAP26	ARHGAP26	0	grey
ARHGAP28	ARHGAP28	0	grey
ARHGAP29	ARHGAP29	0	grey
ARHGAP32	ARHGAP32	1	turquoise
ARHGAP33	ARHGAP33	0	grey
ARHGAP35	ARHGAP35	0	grey
ARHGAP4	ARHGAP4	0	grey
ARHGAP44	ARHGAP44	1	turquoise
ARHGAP5	ARHGAP5	1	turquoise
ARHGAP6	ARHGAP6	1	turquoise
ARHGAP8 /// PRR5-ARHGAP8	ARHGAP8 /// PRR5-ARHGAP8	1	turquoise
ARHGDIA	ARHGDIA	0	grey
ARHGDIB	ARHGDIB	0	grey
ARHGDIG	ARHGDIG	0	grey
ARHGEF1 /// LOC100505585	ARHGEF1 /// LOC100505585	0	grey
ARHGEF10	ARHGEF10	0	grey
ARHGEF10L	ARHGEF10L	1	turquoise
ARHGEF11	ARHGEF11	0	grey
ARHGEF12	ARHGEF12	0	grey
ARHGEF15	ARHGEF15	0	grey
ARHGEF16	ARHGEF16	1	turquoise
ARHGEF17	ARHGEF17	0	grey
ARHGEF18	ARHGEF18	0	grey
ARHGEF2	ARHGEF2	0	grey
ARHGEF26	ARHGEF26	2	blue
ARHGEF28	ARHGEF28	0	grey
ARHGEF3	ARHGEF3	1	turquoise
ARHGEF38	ARHGEF38	0	grey
ARHGEF4	ARHGEF4	0	grey
ARHGEF4 /// LOC101930241	ARHGEF4 /// LOC101930241	0	grey
ARHGEF40	ARHGEF40	0	grey
ARHGEF5	ARHGEF5	0	grey
ARHGEF6	ARHGEF6	1	turquoise
ARHGEF7	ARHGEF7	0	grey
ARHGEF9	ARHGEF9	1	turquoise
ARID1A	ARID1A	0	grey
ARID3A	ARID3A	1	turquoise
ARID3B	ARID3B	0	grey
ARID4A	ARID4A	1	turquoise
ARID4B	ARID4B	0	grey
ARID4B /// RBM34	ARID4B /// RBM34	1	turquoise
ARID5A	ARID5A	0	grey
ARID5B	ARID5B	1	turquoise
ARIH1	ARIH1	0	grey
ARIH2	ARIH2	0	grey
ARL1	ARL1	1	turquoise
ARL14	ARL14	0	grey
ARL15	ARL15	0	grey
ARL17A /// ARL17B	ARL17A /// ARL17B	0	grey
ARL17A /// ARL17B /// LOC100294341	ARL17A /// ARL17B /// LOC100294341	0	grey
ARL2	ARL2	0	grey
ARL2BP	ARL2BP	1	turquoise
ARL3	ARL3	0	grey
ARL4A	ARL4A	0	grey
ARL4C	ARL4C	0	grey
ARL4D	ARL4D	1	turquoise
ARL5A /// LOC101929356	ARL5A /// LOC101929356	0	grey
ARL6IP1	ARL6IP1	1	turquoise
ARL6IP4	ARL6IP4	0	grey
ARL6IP5	ARL6IP5	1	turquoise
ARL8B	ARL8B	1	turquoise
ARMC1	ARMC1	1	turquoise
ARMC2-AS1 /// ATP5J2	ARMC2-AS1 /// ATP5J2	0	grey
ARMC4	ARMC4	1	turquoise
ARMC6	ARMC6	0	grey
ARMC7	ARMC7	0	grey
ARMC8	ARMC8	1	turquoise
ARMC9	ARMC9	3	brown
ARMCX1	ARMCX1	1	turquoise
ARMCX2	ARMCX2	0	grey
ARMCX3	ARMCX3	1	turquoise
ARMCX4	ARMCX4	1	turquoise
ARMCX5	ARMCX5	0	grey
ARMCX6	ARMCX6	0	grey
ARNT	ARNT	0	grey
ARNT2	ARNT2	0	grey
ARNTL	ARNTL	0	grey
ARNTL2	ARNTL2	1	turquoise
ARPC1A	ARPC1A	0	grey
ARPC1B	ARPC1B	1	turquoise
ARPC2	ARPC2	1	turquoise
ARPC3	ARPC3	1	turquoise
ARPC4	ARPC4	0	grey
ARPC4 /// ARPC4-TTLL3	ARPC4 /// ARPC4-TTLL3	0	grey
ARPC4 /// ARPC4-TTLL3 /// TTLL3	ARPC4 /// ARPC4-TTLL3 /// TTLL3	1	turquoise
ARPC5	ARPC5	1	turquoise
ARPC5L	ARPC5L	0	grey
ARPIN	ARPIN	0	grey
ARPP19	ARPP19	0	grey
ARPP21	ARPP21	0	grey
ARR3	ARR3	0	grey
ARRB1	ARRB1	1	turquoise
ARRB2	ARRB2	1	turquoise
ARSA	ARSA	10	purple
ARSB	ARSB	3	brown
ARSD	ARSD	1	turquoise
ARSE	ARSE	0	grey
ARSF	ARSF	1	turquoise
ARSJ	ARSJ	1	turquoise
ART1	ART1	0	grey
ART3	ART3	0	grey
ART4	ART4	0	grey
ARTN	ARTN	1	turquoise
ARVCF	ARVCF	0	grey
ASAH1	ASAH1	1	turquoise
ASAP1	ASAP1	1	turquoise
ASAP1-IT1	ASAP1-IT1	1	turquoise
ASAP2	ASAP2	1	turquoise
ASAP3	ASAP3	1	turquoise
ASB1	ASB1	0	grey
ASB12 /// MTMR8	ASB12 /// MTMR8	0	grey
ASB13	ASB13	0	grey
ASB4	ASB4	0	grey
ASB6	ASB6	0	grey
ASB7	ASB7	0	grey
ASB8	ASB8	1	turquoise
ASB9	ASB9	0	grey
ASCC1	ASCC1	0	grey
ASCC2	ASCC2	1	turquoise
ASCC3	ASCC3	0	grey
ASCL1	ASCL1	0	grey
ASCL2	ASCL2	0	grey
ASCL3	ASCL3	0	grey
ASF1A	ASF1A	0	grey
ASF1B	ASF1B	1	turquoise
ASGR1	ASGR1	0	grey
ASGR2	ASGR2	0	grey
ASH1L	ASH1L	0	grey
ASH2L	ASH2L	0	grey
ASIC1	ASIC1	0	grey
ASIC2	ASIC2	1	turquoise
ASIC4	ASIC4	0	grey
ASIP	ASIP	0	grey
ASL	ASL	1	turquoise
ASMT	ASMT	1	turquoise
ASMTL	ASMTL	0	grey
ASMTL-AS1	ASMTL-AS1	0	grey
ASNA1	ASNA1	1	turquoise
ASNS	ASNS	1	turquoise
ASNSD1	ASNSD1	0	grey
ASPA	ASPA	1	turquoise
ASPH	ASPH	10	purple
ASPHD1	ASPHD1	2	blue
ASPM	ASPM	1	turquoise
ASPN	ASPN	1	turquoise
ASPSCR1	ASPSCR1	1	turquoise
ASRGL1	ASRGL1	0	grey
ASS1	ASS1	0	grey
ASTE1	ASTE1	1	turquoise
ASTN1	ASTN1	0	grey
ASTN2	ASTN2	0	grey
ASUN	ASUN	0	grey
ASXL1	ASXL1	1	turquoise
ASXL2	ASXL2	0	grey
ASXL3	ASXL3	0	grey
ATAD2	ATAD2	1	turquoise
ATAD2B	ATAD2B	0	grey
ATAD3A /// ATAD3B	ATAD3A /// ATAD3B	1	turquoise
ATAD5	ATAD5	1	turquoise
ATAT1	ATAT1	0	grey
ATF1	ATF1	0	grey
ATF2	ATF2	0	grey
ATF3	ATF3	9	magenta
ATF4	ATF4	0	grey
ATF5	ATF5	1	turquoise
ATF6	ATF6	0	grey
ATF6B	ATF6B	0	grey
ATF6B /// TNXB	ATF6B /// TNXB	0	grey
ATF7	ATF7	0	grey
ATF7IP	ATF7IP	0	grey
ATF7IP2	ATF7IP2	0	grey
ATG10	ATG10	0	grey
ATG101	ATG101	1	turquoise
ATG12	ATG12	0	grey
ATG13	ATG13	0	grey
ATG14	ATG14	0	grey
ATG16L1	ATG16L1	0	grey
ATG2A	ATG2A	1	turquoise
ATG2B	ATG2B	0	grey
ATG3	ATG3	1	turquoise
ATG4A	ATG4A	1	turquoise
ATG4B	ATG4B	0	grey
ATG5	ATG5	0	grey
ATG7	ATG7	0	grey
ATG9A	ATG9A	0	grey
ATHL1	ATHL1	0	grey
ATIC	ATIC	1	turquoise
ATM	ATM	0	grey
ATMIN	ATMIN	1	turquoise
ATN1	ATN1	0	grey
ATOH1	ATOH1	0	grey
ATOX1	ATOX1	1	turquoise
ATP10A	ATP10A	0	grey
ATP10B	ATP10B	1	turquoise
ATP10D	ATP10D	0	grey
ATP11A	ATP11A	0	grey
ATP11B	ATP11B	0	grey
ATP12A	ATP12A	0	grey
ATP13A1	ATP13A1	1	turquoise
ATP13A2	ATP13A2	1	turquoise
ATP13A3	ATP13A3	1	turquoise
ATP1A1	ATP1A1	0	grey
ATP1A2	ATP1A2	2	blue
ATP1A3 /// LOC101927137	ATP1A3 /// LOC101927137	0	grey
ATP1B1	ATP1B1	1	turquoise
ATP1B2	ATP1B2	2	blue
ATP1B3	ATP1B3	1	turquoise
ATP1B4	ATP1B4	0	grey
ATP2A1	ATP2A1	0	grey
ATP2A2	ATP2A2	0	grey
ATP2A3	ATP2A3	6	red
ATP2B1	ATP2B1	1	turquoise
ATP2B2	ATP2B2	0	grey
ATP2B3	ATP2B3	0	grey
ATP2B4	ATP2B4	0	grey
ATP2C1	ATP2C1	1	turquoise
ATP2C2	ATP2C2	0	grey
ATP4A	ATP4A	5	green
ATP4B	ATP4B	5	green
ATP5A1	ATP5A1	1	turquoise
ATP5B	ATP5B	0	grey
ATP5C1	ATP5C1	0	grey
ATP5D	ATP5D	1	turquoise
ATP5E	ATP5E	0	grey
ATP5F1	ATP5F1	1	turquoise
ATP5G1	ATP5G1	0	grey
ATP5G2	ATP5G2	0	grey
ATP5G2P1 /// ATP5G2P1	ATP5G2P1 /// ATP5G2P1	4	yellow
ATP5G3	ATP5G3	0	grey
ATP5H	ATP5H	1	turquoise
ATP5I	ATP5I	1	turquoise
ATP5J	ATP5J	1	turquoise
ATP5J2-PTCD1 /// PTCD1	ATP5J2-PTCD1 /// PTCD1	1	turquoise
ATP5L	ATP5L	0	grey
ATP5O	ATP5O	1	turquoise
ATP5S	ATP5S	0	grey
ATP5SL	ATP5SL	0	grey
ATP6AP1	ATP6AP1	0	grey
ATP6AP2	ATP6AP2	0	grey
ATP6V0A1	ATP6V0A1	0	grey
ATP6V0A2	ATP6V0A2	0	grey
ATP6V0A4	ATP6V0A4	1	turquoise
ATP6V0B	ATP6V0B	1	turquoise
ATP6V0C	ATP6V0C	1	turquoise
ATP6V0D1	ATP6V0D1	0	grey
ATP6V0E1	ATP6V0E1	1	turquoise
ATP6V0E2	ATP6V0E2	0	grey
ATP6V1A	ATP6V1A	0	grey
ATP6V1B1	ATP6V1B1	0	grey
ATP6V1B2	ATP6V1B2	0	grey
ATP6V1C1	ATP6V1C1	1	turquoise
ATP6V1D	ATP6V1D	1	turquoise
ATP6V1E1	ATP6V1E1	0	grey
ATP6V1F /// LOC101927180	ATP6V1F /// LOC101927180	0	grey
ATP6V1G1	ATP6V1G1	0	grey
ATP6V1G2	ATP6V1G2	1	turquoise
ATP6V1G2-DDX39B /// DDX39B /// SNORD84	ATP6V1G2-DDX39B /// DDX39B /// SNORD84	1	turquoise
ATP6V1H	ATP6V1H	0	grey
ATP7A	ATP7A	1	turquoise
ATP7B	ATP7B	0	grey
ATP8A1	ATP8A1	1	turquoise
ATP8A2	ATP8A2	0	grey
ATP8B1	ATP8B1	0	grey
ATP8B2	ATP8B2	0	grey
ATP8B3	ATP8B3	0	grey
ATP8B4	ATP8B4	0	grey
ATP9A	ATP9A	0	grey
ATP9B	ATP9B	1	turquoise
ATPAF2	ATPAF2	1	turquoise
ATPIF1	ATPIF1	0	grey
ATR	ATR	1	turquoise
ATRAID	ATRAID	1	turquoise
ATRIP /// TREX1	ATRIP /// TREX1	1	turquoise
ATRN	ATRN	1	turquoise
ATRNL1	ATRNL1	0	grey
ATRX	ATRX	0	grey
ATXN1	ATXN1	0	grey
ATXN10	ATXN10	0	grey
ATXN2	ATXN2	0	grey
ATXN2L	ATXN2L	0	grey
ATXN3	ATXN3	0	grey
ATXN3L	ATXN3L	0	grey
ATXN7	ATXN7	1	turquoise
ATXN7L1	ATXN7L1	0	grey
ATXN7L3B	ATXN7L3B	0	grey
ATXN8OS	ATXN8OS	0	grey
AUH	AUH	0	grey
AUNIP	AUNIP	1	turquoise
AUP1	AUP1	1	turquoise
AURKA	AURKA	1	turquoise
AURKAIP1	AURKAIP1	0	grey
AURKAPS1 /// RAB3GAP2	AURKAPS1 /// RAB3GAP2	1	turquoise
AURKB	AURKB	1	turquoise
AURKC	AURKC	0	grey
AUTS2	AUTS2	1	turquoise
AV8S2 /// TRAV13-2 /// TRAV13-2	AV8S2 /// TRAV13-2 /// TRAV13-2	0	grey
AV8S2A1N1T /// hADV36S1 /// TCR-alpha /// TCR-alpha /// TCRA /// TRAC /// TRAJ20 /// TRAJ20 /// TRAV36DV7 /// TRAV36DV7 /// YME1L1	AV8S2A1N1T /// hADV36S1 /// TCR-alpha /// TCR-alpha /// TCRA /// TRAC /// TRAJ20 /// TRAJ20 /// TRAV36DV7 /// TRAV36DV7 /// YME1L1	0	grey
AVEN	AVEN	0	grey
AVIL	AVIL	1	turquoise
AVL9	AVL9	1	turquoise
AVP	AVP	0	grey
AVPI1	AVPI1	0	grey
AVPR1A	AVPR1A	0	grey
AVPR1B	AVPR1B	0	grey
AVPR2	AVPR2	0	grey
AXIN1	AXIN1	1	turquoise
AXL	AXL	1	turquoise
AZGP1	AZGP1	12	tan
AZGP1 /// AZGP1P1	AZGP1 /// AZGP1P1	12	tan
AZGP1P1	AZGP1P1	0	grey
AZI2	AZI2	1	turquoise
AZIN1	AZIN1	10	purple
AZU1	AZU1	1	turquoise
B2M	B2M	1	turquoise
B3GALNT1	B3GALNT1	0	grey
B3GALT1	B3GALT1	0	grey
B3GALT2	B3GALT2	0	grey
B3GALT4	B3GALT4	1	turquoise
B3GALT5	B3GALT5	1	turquoise
B3GAT1	B3GAT1	0	grey
B3GAT3	B3GAT3	1	turquoise
B3GNT1	B3GNT1	0	grey
B3GNT2	B3GNT2	1	turquoise
B3GNT3	B3GNT3	1	turquoise
B3GNT4	B3GNT4	0	grey
B3GNTL1	B3GNTL1	0	grey
B4GALNT1	B4GALNT1	1	turquoise
B4GALT1	B4GALT1	1	turquoise
B4GALT2	B4GALT2	1	turquoise
B4GALT3	B4GALT3	1	turquoise
B4GALT4	B4GALT4	1	turquoise
B4GALT5	B4GALT5	1	turquoise
B4GALT6	B4GALT6	0	grey
B4GALT7	B4GALT7	0	grey
B9D1	B9D1	0	grey
B9D2	B9D2	0	grey
BAALC	BAALC	1	turquoise
BAAT	BAAT	0	grey
BABAM1	BABAM1	1	turquoise
BACE1	BACE1	0	grey
BACE2	BACE2	1	turquoise
BACH1	BACH1	1	turquoise
BACH1 /// GRIK1-AS2	BACH1 /// GRIK1-AS2	0	grey
BACH2	BACH2	0	grey
BAD	BAD	0	grey
BAG1	BAG1	1	turquoise
BAG2	BAG2	0	grey
BAG3	BAG3	0	grey
BAG4	BAG4	0	grey
BAG5	BAG5	0	grey
BAG6	BAG6	0	grey
BAGE	BAGE	0	grey
BAHCC1	BAHCC1	0	grey
BAHD1	BAHD1	0	grey
BAI1	BAI1	0	grey
BAI2	BAI2	0	grey
BAI3	BAI3	1	turquoise
BAIAP2	BAIAP2	1	turquoise
BAIAP2L2	BAIAP2L2	0	grey
BAIAP3	BAIAP3	0	grey
BAK1	BAK1	1	turquoise
BAMBI	BAMBI	1	turquoise
BANF1	BANF1	1	turquoise
BANK1	BANK1	6	red
BANP	BANP	1	turquoise
BAP1	BAP1	0	grey
BARD1	BARD1	0	grey
BARX1	BARX1	0	grey
BARX2	BARX2	1	turquoise
BASP1	BASP1	1	turquoise
BATF	BATF	0	grey
BATF3	BATF3	0	grey
BAX	BAX	1	turquoise
BAZ1A	BAZ1A	1	turquoise
BAZ1B	BAZ1B	1	turquoise
BAZ2A	BAZ2A	0	grey
BAZ2B	BAZ2B	1	turquoise
BBC3 /// MIR3190 /// MIR3191	BBC3 /// MIR3190 /// MIR3191	1	turquoise
BBIP1	BBIP1	1	turquoise
BBOX1	BBOX1	1	turquoise
BBS1	BBS1	0	grey
BBS10	BBS10	0	grey
BBS4	BBS4	0	grey
BBS7	BBS7	0	grey
BBS9	BBS9	0	grey
BBX	BBX	1	turquoise
BC069004	BC069004	0	grey
BC069739	BC069739	0	grey
BC069756	BC069756	0	grey
BC069776	BC069776	0	grey
BC069782 /// STAMBPL1	BC069782 /// STAMBPL1	0	grey
BC069804 /// SMAD1	BC069804 /// SMAD1	0	grey
BC113958	BC113958	0	grey
BC127192 /// SHANK2	BC127192 /// SHANK2	0	grey
BCAM	BCAM	1	turquoise
BCAN	BCAN	0	grey
BCAP29	BCAP29	1	turquoise
BCAP31	BCAP31	13	salmon
BCAR3	BCAR3	0	grey
BCAS1	BCAS1	1	turquoise
BCAS2	BCAS2	0	grey
BCAS3	BCAS3	0	grey
BCAS4	BCAS4	0	grey
BCAT1	BCAT1	1	turquoise
BCAT2	BCAT2	0	grey
BCCIP	BCCIP	1	turquoise
BCHE	BCHE	2	blue
BCKDHA	BCKDHA	1	turquoise
BCKDHB	BCKDHB	1	turquoise
BCKDK	BCKDK	0	grey
BCL10	BCL10	1	turquoise
BCL11A	BCL11A	0	grey
BCL11B	BCL11B	1	turquoise
BCL2	BCL2	0	grey
BCL2A1	BCL2A1	1	turquoise
BCL2L1	BCL2L1	0	grey
BCL2L10	BCL2L10	0	grey
BCL2L11	BCL2L11	1	turquoise
BCL2L13	BCL2L13	0	grey
BCL2L14	BCL2L14	0	grey
BCL2L2	BCL2L2	1	turquoise
BCL2L2-PABPN1 /// PABPN1	BCL2L2-PABPN1 /// PABPN1	1	turquoise
BCL2L2 /// BCL2L2-PABPN1 /// PABPN1	BCL2L2 /// BCL2L2-PABPN1 /// PABPN1	1	turquoise
BCL3 /// MIR8085	BCL3 /// MIR8085	0	grey
BCL6	BCL6	1	turquoise
BCL7A	BCL7A	1	turquoise
BCL7B	BCL7B	1	turquoise
BCL7C	BCL7C	0	grey
BCL9	BCL9	0	grey
BCLAF1	BCLAF1	0	grey
BCMO1	BCMO1	0	grey
BCOR	BCOR	1	turquoise
BCORL1	BCORL1	0	grey
BCR	BCR	0	grey
BCS1L	BCS1L	0	grey
BDH1	BDH1	0	grey
BDH2	BDH2	1	turquoise
BDKRB1	BDKRB1	0	grey
BDKRB2	BDKRB2	1	turquoise
BDNF	BDNF	0	grey
BEAN1	BEAN1	1	turquoise
BECN1	BECN1	0	grey
BEGAIN	BEGAIN	0	grey
BEND5	BEND5	0	grey
BEST1	BEST1	0	grey
BEST2	BEST2	0	grey
BET1	BET1	1	turquoise
BET1L	BET1L	0	grey
BEX1	BEX1	0	grey
BEX4	BEX4	1	turquoise
BFAR	BFAR	1	turquoise
BFSP1	BFSP1	0	grey
BFSP2	BFSP2	0	grey
BGLAP /// PMF1 /// PMF1-BGLAP	BGLAP /// PMF1 /// PMF1-BGLAP	0	grey
BGN	BGN	1	turquoise
BHLHB9	BHLHB9	1	turquoise
BHLHE40	BHLHE40	9	magenta
BHLHE41	BHLHE41	1	turquoise
BHMT	BHMT	1	turquoise
BHMT2	BHMT2	1	turquoise
BICC1	BICC1	8	pink
BICD1	BICD1	1	turquoise
BICD2	BICD2	0	grey
BID	BID	1	turquoise
BIK	BIK	1	turquoise
BIN1	BIN1	0	grey
BIN2	BIN2	0	grey
BIN3	BIN3	0	grey
BIN3-IT1	BIN3-IT1	0	grey
BIRC2	BIRC2	1	turquoise
BIRC3	BIRC3	0	grey
BIRC5	BIRC5	1	turquoise
BIRC7	BIRC7	0	grey
BLCAP	BLCAP	1	turquoise
BLK	BLK	6	red
BLM	BLM	1	turquoise
BLMH	BLMH	1	turquoise
BLNK	BLNK	1	turquoise
BLOC1S1	BLOC1S1	1	turquoise
BLOC1S1-RDH5 /// RDH5	BLOC1S1-RDH5 /// RDH5	1	turquoise
BLOC1S5-TXNDC5 /// TXNDC5	BLOC1S5-TXNDC5 /// TXNDC5	1	turquoise
BLVRA	BLVRA	1	turquoise
BLVRB	BLVRB	1	turquoise
BLZF1	BLZF1	1	turquoise
BMI1 /// COMMD3-BMI1	BMI1 /// COMMD3-BMI1	1	turquoise
BMP1	BMP1	1	turquoise
BMP10	BMP10	0	grey
BMP15	BMP15	1	turquoise
BMP2	BMP2	0	grey
BMP2K	BMP2K	0	grey
BMP3	BMP3	0	grey
BMP4	BMP4	0	grey
BMP5	BMP5	0	grey
BMP6	BMP6	0	grey
BMP7	BMP7	1	turquoise
BMP8A	BMP8A	0	grey
BMP8B	BMP8B	0	grey
BMPR1A	BMPR1A	0	grey
BMPR1B	BMPR1B	0	grey
BMPR2	BMPR2	0	grey
BMS1	BMS1	1	turquoise
BMX	BMX	2	blue
BNC1	BNC1	1	turquoise
BNC2	BNC2	2	blue
BNIP1	BNIP1	0	grey
BNIP2	BNIP2	0	grey
BNIP3	BNIP3	1	turquoise
BNIP3L	BNIP3L	0	grey
BOLA1	BOLA1	1	turquoise
BOLA2 /// BOLA2B	BOLA2 /// BOLA2B	1	turquoise
BOLA2 /// LOC101060386 /// SMG1	BOLA2 /// LOC101060386 /// SMG1	0	grey
BOLA2 /// SMG1P2 /// SMG1P5	BOLA2 /// SMG1P2 /// SMG1P5	1	turquoise
BOP1 /// MIR7112	BOP1 /// MIR7112	1	turquoise
BORA	BORA	1	turquoise
BPESC1	BPESC1	0	grey
BPGM	BPGM	0	grey
BPHL	BPHL	0	grey
BPI /// LOC149684	BPI /// LOC149684	0	grey
BPIFA1	BPIFA1	0	grey
BPNT1	BPNT1	0	grey
BPTF	BPTF	1	turquoise
BPY2	BPY2	0	grey
BRAF /// KIAA1549	BRAF /// KIAA1549	1	turquoise
BRAP	BRAP	0	grey
BRCA1	BRCA1	1	turquoise
BRCA2	BRCA2	1	turquoise
BRCC3	BRCC3	1	turquoise
BRD1	BRD1	0	grey
BRD2	BRD2	0	grey
BRD3	BRD3	1	turquoise
BRD4	BRD4	1	turquoise
BRD7	BRD7	0	grey
BRD7P3	BRD7P3	0	grey
BRD8	BRD8	0	grey
BRD9	BRD9	1	turquoise
BRDT	BRDT	0	grey
BRE	BRE	0	grey
BRF1	BRF1	0	grey
BRF2	BRF2	0	grey
BRINP1	BRINP1	0	grey
BRINP2	BRINP2	0	grey
BRINP3	BRINP3	0	grey
BRIP1	BRIP1	1	turquoise
BRIX1	BRIX1	1	turquoise
BRMS1	BRMS1	1	turquoise
BRPF1	BRPF1	0	grey
BRS3	BRS3	0	grey
BRSK2	BRSK2	0	grey
BRWD1	BRWD1	0	grey
BSCL2 /// HNRNPUL2-BSCL2	BSCL2 /// HNRNPUL2-BSCL2	0	grey
BSDC1	BSDC1	1	turquoise
BSG	BSG	1	turquoise
BSN	BSN	0	grey
BSPRY	BSPRY	1	turquoise
BST1	BST1	0	grey
BST2	BST2	1	turquoise
BTAF1	BTAF1	0	grey
BTBD1	BTBD1	0	grey
BTBD18	BTBD18	0	grey
BTBD2	BTBD2	0	grey
BTBD3	BTBD3	0	grey
BTBD7	BTBD7	1	turquoise
BTC	BTC	2	blue
BTD	BTD	1	turquoise
BTF3	BTF3	4	yellow
BTF3P11	BTF3P11	1	turquoise
BTF3P12 /// BTF3P12	BTF3P12 /// BTF3P12	4	yellow
BTF3P13 /// BTF3P13	BTF3P13 /// BTF3P13	4	yellow
BTG1	BTG1	1	turquoise
BTG2	BTG2	9	magenta
BTG3	BTG3	1	turquoise
BTG4	BTG4	0	grey
BTK	BTK	0	grey
BTN1A1	BTN1A1	0	grey
BTN2A1	BTN2A1	0	grey
BTN2A2	BTN2A2	0	grey
BTN2A3P	BTN2A3P	0	grey
BTN3A1	BTN3A1	1	turquoise
BTN3A2	BTN3A2	1	turquoise
BTN3A2 /// BTN3A3	BTN3A2 /// BTN3A3	1	turquoise
BTN3A3	BTN3A3	1	turquoise
BTNL2	BTNL2	0	grey
BTNL3	BTNL3	0	grey
BTNL8	BTNL8	1	turquoise
BTRC	BTRC	1	turquoise
BUB1	BUB1	1	turquoise
BUB1B	BUB1B	1	turquoise
BUB3	BUB3	1	turquoise
BUD31	BUD31	1	turquoise
BV03S1J2.2 /// IL23A /// TCRB /// TCRVB /// TRBC2 /// TRBC2 /// TRBJ2-7 /// TRBJ2-7 /// TRBV19	BV03S1J2.2 /// IL23A /// TCRB /// TCRVB /// TRBC2 /// TRBC2 /// TRBJ2-7 /// TRBJ2-7 /// TRBV19	1	turquoise
BYSL	BYSL	1	turquoise
BZRAP1	BZRAP1	0	grey
BZW1	BZW1	1	turquoise
BZW2	BZW2	1	turquoise
C10orf10	C10orf10	0	grey
C10orf12	C10orf12	0	grey
C10orf2	C10orf2	1	turquoise
C10orf76	C10orf76	1	turquoise
C10orf88	C10orf88	0	grey
C10orf95	C10orf95	0	grey
C11orf1	C11orf1	0	grey
C11orf16	C11orf16	0	grey
C11orf21	C11orf21	0	grey
C11orf24	C11orf24	1	turquoise
C11orf30	C11orf30	11	greenyellow
C11orf48 /// LOC102288414	C11orf48 /// LOC102288414	1	turquoise
C11orf49	C11orf49	0	grey
C11orf57	C11orf57	1	turquoise
C11orf58	C11orf58	0	grey
C11orf63	C11orf63	1	turquoise
C11orf68	C11orf68	0	grey
C11orf71	C11orf71	0	grey
C11orf73	C11orf73	0	grey
C11orf80	C11orf80	0	grey
C11orf95	C11orf95	11	greenyellow
C12orf10	C12orf10	0	grey
C12orf29	C12orf29	1	turquoise
C12orf4	C12orf4	1	turquoise
C12orf43	C12orf43	0	grey
C12orf49	C12orf49	0	grey
C12orf5	C12orf5	1	turquoise
C14orf1	C14orf1	0	grey
C14orf105	C14orf105	0	grey
C14orf132	C14orf132	1	turquoise
C14orf159	C14orf159	0	grey
C14orf166	C14orf166	1	turquoise
C14orf169	C14orf169	1	turquoise
C14orf2	C14orf2	1	turquoise
C14orf79	C14orf79	1	turquoise
C14orf93	C14orf93	1	turquoise
C15orf39	C15orf39	0	grey
C15orf49	C15orf49	0	grey
C16orf3	C16orf3	0	grey
C16orf45	C16orf45	1	turquoise
C16orf58	C16orf58	0	grey
C16orf59	C16orf59	1	turquoise
C16orf62	C16orf62	0	grey
C16orf70	C16orf70	0	grey
C16orf71	C16orf71	0	grey
C16orf80	C16orf80	1	turquoise
C16orf95	C16orf95	1	turquoise
C17orf53	C17orf53	1	turquoise
C17orf59	C17orf59	0	grey
C17orf62	C17orf62	1	turquoise
C17orf70	C17orf70	0	grey
C17orf75	C17orf75	1	turquoise
C17orf80	C17orf80	0	grey
C17orf85	C17orf85	1	turquoise
C18orf25	C18orf25	1	turquoise
C18orf32 /// RPL17 /// RPL17-C18orf32 /// SNORD58A /// SNORD58B /// SNORD58C	C18orf32 /// RPL17 /// RPL17-C18orf32 /// SNORD58A /// SNORD58B /// SNORD58C	1	turquoise
C18orf8	C18orf8	0	grey
C19orf10	C19orf10	1	turquoise
C19orf24	C19orf24	0	grey
C19orf26	C19orf26	0	grey
C19orf40	C19orf40	0	grey
C19orf53	C19orf53	1	turquoise
C19orf54	C19orf54	1	turquoise
C19orf57	C19orf57	0	grey
C19orf60	C19orf60	0	grey
C19orf66	C19orf66	1	turquoise
C19orf73	C19orf73	0	grey
C19orf80	C19orf80	1	turquoise
C1D	C1D	1	turquoise
C1GALT1	C1GALT1	1	turquoise
C1GALT1C1	C1GALT1C1	0	grey
C1orf105	C1orf105	0	grey
C1orf106	C1orf106	0	grey
C1orf109	C1orf109	1	turquoise
C1orf112	C1orf112	1	turquoise
C1orf115	C1orf115	0	grey
C1orf116	C1orf116	1	turquoise
C1orf123	C1orf123	1	turquoise
C1orf159	C1orf159	4	yellow
C1orf174	C1orf174	1	turquoise
C1orf186 /// LOC100505650 /// LOC101929219	C1orf186 /// LOC100505650 /// LOC101929219	0	grey
C1orf21	C1orf21	1	turquoise
C1orf216	C1orf216	1	turquoise
C1orf27	C1orf27	1	turquoise
C1orf35	C1orf35	1	turquoise
C1orf50	C1orf50	0	grey
C1orf50 /// LOC100129924	C1orf50 /// LOC100129924	0	grey
C1orf54	C1orf54	3	brown
C1orf56	C1orf56	1	turquoise
C1orf61	C1orf61	0	grey
C1orf68	C1orf68	0	grey
C1orf95	C1orf95	2	blue
C1QA	C1QA	3	brown
C1QB	C1QB	1	turquoise
C1QBP	C1QBP	0	grey
C1QL1	C1QL1	0	grey
C1QTNF1	C1QTNF1	0	grey
C1QTNF3	C1QTNF3	0	grey
C1QTNF9B-AS1	C1QTNF9B-AS1	1	turquoise
C1R	C1R	1	turquoise
C1RL	C1RL	1	turquoise
C1S	C1S	1	turquoise
C2	C2	3	brown
C20orf195	C20orf195	0	grey
C20orf24 /// TGIF2-C20orf24	C20orf24 /// TGIF2-C20orf24	1	turquoise
C20orf27	C20orf27	1	turquoise
C21orf2	C21orf2	0	grey
C21orf33	C21orf33	1	turquoise
C21orf59	C21orf59	0	grey
C21orf62	C21orf62	0	grey
C21orf91	C21orf91	0	grey
C22orf24	C22orf24	0	grey
C22orf29 /// GNB1L	C22orf29 /// GNB1L	0	grey
C22orf31	C22orf31	0	grey
C22orf46	C22orf46	0	grey
C2CD2	C2CD2	0	grey
C2CD2L	C2CD2L	1	turquoise
C2CD3	C2CD3	11	greenyellow
C2CD5	C2CD5	0	grey
C2orf27A	C2orf27A	0	grey
C2orf42	C2orf42	0	grey
C2orf43	C2orf43	0	grey
C2orf44	C2orf44	1	turquoise
C2orf47	C2orf47	1	turquoise
C2orf49	C2orf49	0	grey
C2orf54	C2orf54	1	turquoise
C2orf68	C2orf68	3	brown
C2orf72	C2orf72	0	grey
C2orf83	C2orf83	0	grey
C3	C3	0	grey
C3AR1	C3AR1	3	brown
C3orf14	C3orf14	1	turquoise
C3orf18	C3orf18	1	turquoise
C3orf27	C3orf27	0	grey
C3orf36	C3orf36	0	grey
C3orf52	C3orf52	1	turquoise
C3orf62 /// MIR4271 /// USP4	C3orf62 /// MIR4271 /// USP4	1	turquoise
C4A /// C4B /// C4B_2	C4A /// C4B /// C4B_2	1	turquoise
C4BPA	C4BPA	0	grey
C4BPB	C4BPB	0	grey
C4orf19	C4orf19	5	green
C4orf27	C4orf27	0	grey
C4orf29	C4orf29	0	grey
C4orf46 /// TOMM7	C4orf46 /// TOMM7	0	grey
C4orf6	C4orf6	0	grey
C5	C5	0	grey
C5AR1	C5AR1	3	brown
C5AR2	C5AR2	0	grey
C5orf15	C5orf15	1	turquoise
C5orf22	C5orf22	1	turquoise
C5orf28	C5orf28	1	turquoise
C5orf30	C5orf30	0	grey
C5orf42	C5orf42	0	grey
C5orf45	C5orf45	0	grey
C5orf66	C5orf66	1	turquoise
C6	C6	2	blue
C6orf10	C6orf10	0	grey
C6orf106	C6orf106	0	grey
C6orf120	C6orf120	0	grey
C6orf123	C6orf123	0	grey
C6orf15	C6orf15	0	grey
C6orf211	C6orf211	0	grey
C6orf25	C6orf25	0	grey
C6orf47	C6orf47	0	grey
C6orf48	C6orf48	1	turquoise
C6orf62	C6orf62	1	turquoise
C7	C7	1	turquoise
C7orf25 /// PSMA2	C7orf25 /// PSMA2	1	turquoise
C7orf26	C7orf26	1	turquoise
C7orf43	C7orf43	0	grey
C7orf49	C7orf49	0	grey
C7orf55-LUC7L2 /// LUC7L2	C7orf55-LUC7L2 /// LUC7L2	1	turquoise
C7orf63	C7orf63	0	grey
C7orf69	C7orf69	0	grey
C8A	C8A	0	grey
C8B	C8B	0	grey
C8G	C8G	0	grey
C8orf17	C8orf17	0	grey
C8orf33	C8orf33	1	turquoise
C8orf4	C8orf4	0	grey
C8orf44	C8orf44	0	grey
C8orf44-SGK3 /// SGK3	C8orf44-SGK3 /// SGK3	0	grey
C8orf60	C8orf60	0	grey
C9	C9	0	grey
C9orf114	C9orf114	1	turquoise
C9orf116	C9orf116	0	grey
C9orf156	C9orf156	0	grey
C9orf16	C9orf16	0	grey
C9orf3	C9orf3	0	grey
C9orf38	C9orf38	0	grey
C9orf40	C9orf40	0	grey
C9orf53	C9orf53	0	grey
C9orf78	C9orf78	0	grey
C9orf9	C9orf9	1	turquoise
C9orf91	C9orf91	1	turquoise
CA1	CA1	0	grey
CA10	CA10	0	grey
CA11	CA11	0	grey
CA12	CA12	0	grey
CA14	CA14	0	grey
CA2	CA2	0	grey
CA3	CA3	0	grey
CA4	CA4	0	grey
CA5A	CA5A	0	grey
CA5B	CA5B	1	turquoise
CA5BP1	CA5BP1	0	grey
CA6	CA6	0	grey
CA7	CA7	0	grey
CA8	CA8	0	grey
CA9	CA9	1	turquoise
CAAP1	CAAP1	0	grey
CAB39	CAB39	1	turquoise
CAB39L	CAB39L	1	turquoise
CABIN1	CABIN1	0	grey
CABP1	CABP1	0	grey
CABP2	CABP2	0	grey
CABP5	CABP5	0	grey
CABYR	CABYR	1	turquoise
CACFD1	CACFD1	1	turquoise
CACNA1A /// LOC100507353	CACNA1A /// LOC100507353	0	grey
CACNA1B	CACNA1B	0	grey
CACNA1C	CACNA1C	0	grey
CACNA1D	CACNA1D	0	grey
CACNA1E	CACNA1E	0	grey
CACNA1F	CACNA1F	0	grey
CACNA1G	CACNA1G	0	grey
CACNA1H	CACNA1H	1	turquoise
CACNA1I	CACNA1I	0	grey
CACNA1S	CACNA1S	0	grey
CACNA2D1	CACNA2D1	0	grey
CACNA2D2	CACNA2D2	1	turquoise
CACNA2D3	CACNA2D3	0	grey
CACNB1	CACNB1	0	grey
CACNB2	CACNB2	2	blue
CACNB3	CACNB3	0	grey
CACNB4	CACNB4	1	turquoise
CACNG1	CACNG1	0	grey
CACNG2	CACNG2	0	grey
CACNG3	CACNG3	0	grey
CACNG4	CACNG4	0	grey
CACNG5	CACNG5	0	grey
CACTIN	CACTIN	1	turquoise
CACYBP	CACYBP	1	turquoise
CAD	CAD	1	turquoise
CADM1	CADM1	1	turquoise
CADM3	CADM3	1	turquoise
CADM3-AS1	CADM3-AS1	1	turquoise
CADM4	CADM4	0	grey
CADPS	CADPS	0	grey
CADPS2	CADPS2	0	grey
CALB1	CALB1	1	turquoise
CALB2	CALB2	1	turquoise
CALCA	CALCA	0	grey
CALCB	CALCB	0	grey
CALCOCO1	CALCOCO1	1	turquoise
CALCOCO2	CALCOCO2	1	turquoise
CALCR	CALCR	0	grey
CALCRL	CALCRL	0	grey
CALD1	CALD1	0	grey
CALHM2	CALHM2	0	grey
CALM1	CALM1	1	turquoise
CALM1 /// CALM2 /// CALM3	CALM1 /// CALM2 /// CALM3	1	turquoise
CALML3	CALML3	1	turquoise
CALML4	CALML4	0	grey
CALML5	CALML5	0	grey
CALR	CALR	1	turquoise
CALU	CALU	1	turquoise
CALY	CALY	0	grey
CAMK1	CAMK1	1	turquoise
CAMK1D	CAMK1D	1	turquoise
CAMK1G	CAMK1G	0	grey
CAMK2A	CAMK2A	0	grey
CAMK2B	CAMK2B	0	grey
CAMK2G	CAMK2G	1	turquoise
CAMK2N1	CAMK2N1	1	turquoise
CAMK4	CAMK4	0	grey
CAMKK2	CAMKK2	1	turquoise
CAMKMT	CAMKMT	0	grey
CAMKV	CAMKV	0	grey
CAMLG	CAMLG	1	turquoise
CAMP	CAMP	0	grey
CAMSAP1	CAMSAP1	1	turquoise
CAMSAP2	CAMSAP2	1	turquoise
CAMTA1	CAMTA1	0	grey
CAMTA2	CAMTA2	0	grey
CAND1	CAND1	1	turquoise
CAND2	CAND2	1	turquoise
CANT1	CANT1	1	turquoise
CANX	CANX	0	grey
CAP1	CAP1	0	grey
CAP2	CAP2	1	turquoise
CAPG	CAPG	0	grey
CAPN1	CAPN1	1	turquoise
CAPN10	CAPN10	1	turquoise
CAPN11	CAPN11	0	grey
CAPN15	CAPN15	0	grey
CAPN2	CAPN2	1	turquoise
CAPN3	CAPN3	0	grey
CAPN5	CAPN5	1	turquoise
CAPN6	CAPN6	0	grey
CAPN7	CAPN7	1	turquoise
CAPN9	CAPN9	5	green
CAPNS1	CAPNS1	1	turquoise
CAPRIN1	CAPRIN1	0	grey
CAPRIN2	CAPRIN2	1	turquoise
CAPZA1	CAPZA1	0	grey
CAPZA2	CAPZA2	0	grey
CAPZB	CAPZB	1	turquoise
CARD10	CARD10	1	turquoise
CARD14	CARD14	1	turquoise
CARD8	CARD8	0	grey
CARD9 /// DNLZ	CARD9 /// DNLZ	0	grey
CARF	CARF	0	grey
CARHSP1	CARHSP1	1	turquoise
CARKD	CARKD	0	grey
CARM1	CARM1	1	turquoise
CARS	CARS	0	grey
CARS2	CARS2	0	grey
CARTPT	CARTPT	0	grey
CASC1	CASC1	0	grey
CASC3 /// MIR6866	CASC3 /// MIR6866	0	grey
CASC5	CASC5	2	blue
CASD1	CASD1	0	grey
CASK	CASK	1	turquoise
CASKIN2	CASKIN2	0	grey
CASP1	CASP1	0	grey
CASP10	CASP10	1	turquoise
CASP2	CASP2	1	turquoise
CASP3	CASP3	0	grey
CASP4	CASP4	0	grey
CASP5	CASP5	0	grey
CASP6	CASP6	0	grey
CASP7	CASP7	1	turquoise
CASP8	CASP8	0	grey
CASP8AP2	CASP8AP2	1	turquoise
CASP9	CASP9	1	turquoise
CASQ1	CASQ1	0	grey
CASQ2	CASQ2	2	blue
CASR	CASR	0	grey
CASS4	CASS4	0	grey
CAST	CAST	1	turquoise
CASZ1	CASZ1	1	turquoise
CAT	CAT	1	turquoise
CATR1	CATR1	0	grey
CATSPER2 /// CATSPER2P1 /// LOC101930343	CATSPER2 /// CATSPER2P1 /// LOC101930343	0	grey
CATSPERB	CATSPERB	0	grey
CATSPERG	CATSPERG	0	grey
CAV1	CAV1	0	grey
CAV2	CAV2	1	turquoise
CAV3	CAV3	0	grey
CBFA2T2	CBFA2T2	0	grey
CBFA2T3	CBFA2T3	0	grey
CBFB	CBFB	1	turquoise
CBL	CBL	0	grey
CBLB	CBLB	1	turquoise
CBLC	CBLC	0	grey
CBLL1	CBLL1	1	turquoise
CBLN1	CBLN1	0	grey
CBR1	CBR1	0	grey
CBR3	CBR3	1	turquoise
CBR4	CBR4	1	turquoise
CBS	CBS	1	turquoise
CBWD1 /// CBWD2 /// CBWD3 /// CBWD5 /// CBWD6 /// CBWD7 /// LOC101060578	CBWD1 /// CBWD2 /// CBWD3 /// CBWD5 /// CBWD6 /// CBWD7 /// LOC101060578	1	turquoise
CBX1	CBX1	1	turquoise
CBX2	CBX2	0	grey
CBX3	CBX3	1	turquoise
CBX4	CBX4	0	grey
CBX5	CBX5	1	turquoise
CBX6	CBX6	1	turquoise
CBX7	CBX7	1	turquoise
CBX8	CBX8	0	grey
CBY1	CBY1	0	grey
CC2D1A	CC2D1A	0	grey
CCAR2	CCAR2	0	grey
CCBL1	CCBL1	1	turquoise
CCBL2	CCBL2	1	turquoise
CCDC101	CCDC101	0	grey
CCDC102B	CCDC102B	0	grey
CCDC106	CCDC106	0	grey
CCDC109B	CCDC109B	1	turquoise
CCDC121	CCDC121	0	grey
CCDC130	CCDC130	0	grey
CCDC132	CCDC132	0	grey
CCDC134	CCDC134	0	grey
CCDC144A	CCDC144A	0	grey
CCDC15	CCDC15	0	grey
CCDC169-SOHLH2 /// SOHLH2	CCDC169-SOHLH2 /// SOHLH2	0	grey
CCDC170	CCDC170	0	grey
CCDC176	CCDC176	0	grey
CCDC177	CCDC177	0	grey
CCDC181	CCDC181	0	grey
CCDC186	CCDC186	1	turquoise
CCDC19	CCDC19	0	grey
CCDC22	CCDC22	0	grey
CCDC25	CCDC25	0	grey
CCDC28A	CCDC28A	0	grey
CCDC28B	CCDC28B	0	grey
CCDC30	CCDC30	0	grey
CCDC33	CCDC33	0	grey
CCDC40	CCDC40	0	grey
CCDC47	CCDC47	0	grey
CCDC51	CCDC51	0	grey
CCDC53	CCDC53	1	turquoise
CCDC57	CCDC57	0	grey
CCDC59	CCDC59	1	turquoise
CCDC6	CCDC6	1	turquoise
CCDC64	CCDC64	0	grey
CCDC68	CCDC68	0	grey
CCDC69	CCDC69	1	turquoise
CCDC7	CCDC7	0	grey
CCDC70	CCDC70	0	grey
CCDC71	CCDC71	0	grey
CCDC81	CCDC81	0	grey
CCDC82	CCDC82	0	grey
CCDC85B	CCDC85B	0	grey
CCDC85C	CCDC85C	0	grey
CCDC86	CCDC86	1	turquoise
CCDC87	CCDC87	0	grey
CCDC88A	CCDC88A	2	blue
CCDC88C	CCDC88C	1	turquoise
CCDC9	CCDC9	0	grey
CCDC90B	CCDC90B	1	turquoise
CCDC91	CCDC91	0	grey
CCDC92	CCDC92	0	grey
CCDC93	CCDC93	1	turquoise
CCDC94	CCDC94	0	grey
CCHCR1	CCHCR1	0	grey
CCIN	CCIN	1	turquoise
CCK	CCK	0	grey
CCKAR	CCKAR	5	green
CCKBR	CCKBR	5	green
CCL1	CCL1	0	grey
CCL11	CCL11	0	grey
CCL13	CCL13	0	grey
CCL14 /// CCL15-CCL14	CCL14 /// CCL15-CCL14	2	blue
CCL15 /// CCL15-CCL14	CCL15 /// CCL15-CCL14	0	grey
CCL16	CCL16	0	grey
CCL17	CCL17	1	turquoise
CCL18	CCL18	3	brown
CCL19	CCL19	6	red
CCL2	CCL2	0	grey
CCL20	CCL20	1	turquoise
CCL21	CCL21	0	grey
CCL22	CCL22	3	brown
CCL23	CCL23	0	grey
CCL24	CCL24	0	grey
CCL25	CCL25	0	grey
CCL27	CCL27	0	grey
CCL3 /// CCL3L1 /// CCL3L3	CCL3 /// CCL3L1 /// CCL3L3	1	turquoise
CCL4	CCL4	1	turquoise
CCL5	CCL5	0	grey
CCL7	CCL7	3	brown
CCL8	CCL8	1	turquoise
CCNA1	CCNA1	0	grey
CCNA2	CCNA2	1	turquoise
CCNB1	CCNB1	1	turquoise
CCNB1IP1	CCNB1IP1	1	turquoise
CCNB2	CCNB2	1	turquoise
CCNC	CCNC	0	grey
CCND1	CCND1	0	grey
CCND2	CCND2	0	grey
CCND3	CCND3	0	grey
CCNE1	CCNE1	1	turquoise
CCNE2	CCNE2	1	turquoise
CCNF	CCNF	1	turquoise
CCNG1	CCNG1	1	turquoise
CCNG2	CCNG2	1	turquoise
CCNH	CCNH	0	grey
CCNI	CCNI	1	turquoise
CCNJ	CCNJ	0	grey
CCNJL	CCNJL	0	grey
CCNK	CCNK	0	grey
CCNL1	CCNL1	1	turquoise
CCNL2	CCNL2	0	grey
CCNO	CCNO	0	grey
CCNT1	CCNT1	0	grey
CCNT2	CCNT2	0	grey
CCP110	CCP110	1	turquoise
CCPG1	CCPG1	0	grey
CCPG1 /// DYX1C1-CCPG1	CCPG1 /// DYX1C1-CCPG1	1	turquoise
CCR1	CCR1	3	brown
CCR10	CCR10	0	grey
CCR2	CCR2	0	grey
CCR3	CCR3	0	grey
CCR4	CCR4	0	grey
CCR5	CCR5	3	brown
CCR6	CCR6	0	grey
CCR7	CCR7	6	red
CCR8	CCR8	1	turquoise
CCR9	CCR9	0	grey
CCRL2	CCRL2	3	brown
CCRN4L	CCRN4L	0	grey
CCS	CCS	1	turquoise
CCSER2	CCSER2	1	turquoise
CCT2	CCT2	1	turquoise
CCT3 /// LOC101927137	CCT3 /// LOC101927137	1	turquoise
CCT4	CCT4	1	turquoise
CCT5	CCT5	1	turquoise
CCT6A	CCT6A	1	turquoise
CCT6B	CCT6B	0	grey
CCT7	CCT7	1	turquoise
CCT8	CCT8	1	turquoise
CCT8L2	CCT8L2	0	grey
CCZ1	CCZ1	0	grey
CCZ1 /// CCZ1B	CCZ1 /// CCZ1B	1	turquoise
CCZ1B	CCZ1B	0	grey
CD101	CD101	1	turquoise
CD14	CD14	3	brown
CD151	CD151	0	grey
CD160	CD160	0	grey
CD163	CD163	3	brown
CD164	CD164	0	grey
CD177	CD177	0	grey
CD180	CD180	6	red
CD19	CD19	6	red
CD1A	CD1A	1	turquoise
CD1B	CD1B	0	grey
CD1C	CD1C	1	turquoise
CD1D	CD1D	0	grey
CD1E	CD1E	2	blue
CD2	CD2	0	grey
CD200	CD200	0	grey
CD207	CD207	1	turquoise
CD209	CD209	0	grey
CD22	CD22	6	red
CD226	CD226	0	grey
CD24	CD24	1	turquoise
CD244	CD244	1	turquoise
CD247	CD247	0	grey
CD248	CD248	8	pink
CD27	CD27	6	red
CD28	CD28	0	grey
CD2AP	CD2AP	1	turquoise
CD2BP2	CD2BP2	1	turquoise
CD300A	CD300A	3	brown
CD300C	CD300C	0	grey
CD302 /// LY75 /// LY75-CD302	CD302 /// LY75 /// LY75-CD302	2	blue
CD320	CD320	1	turquoise
CD33	CD33	0	grey
CD34	CD34	1	turquoise
CD36	CD36	0	grey
CD37	CD37	6	red
CD38	CD38	2	blue
CD3D	CD3D	0	grey
CD3E	CD3E	0	grey
CD3EAP	CD3EAP	1	turquoise
CD3G	CD3G	0	grey
CD4	CD4	3	brown
CD40	CD40	1	turquoise
CD40LG	CD40LG	0	grey
CD44	CD44	0	grey
CD46	CD46	0	grey
CD47	CD47	0	grey
CD48	CD48	6	red
CD5	CD5	1	turquoise
CD52	CD52	6	red
CD53	CD53	6	red
CD55	CD55	9	magenta
CD58	CD58	0	grey
CD59	CD59	1	turquoise
CD5L	CD5L	1	turquoise
CD6	CD6	0	grey
CD63	CD63	0	grey
CD68 /// LOC101928634 /// SNORA67	CD68 /// LOC101928634 /// SNORA67	0	grey
CD69	CD69	0	grey
CD7	CD7	0	grey
CD70	CD70	0	grey
CD72	CD72	6	red
CD74	CD74	0	grey
CD79A	CD79A	6	red
CD79B	CD79B	6	red
CD80	CD80	3	brown
CD81	CD81	1	turquoise
CD82	CD82	1	turquoise
CD83	CD83	1	turquoise
CD84	CD84	3	brown
CD86	CD86	3	brown
CD8A	CD8A	1	turquoise
CD8B /// LOC100996919	CD8B /// LOC100996919	0	grey
CD9	CD9	0	grey
CD93	CD93	0	grey
CD96	CD96	0	grey
CD97	CD97	0	grey
CD99	CD99	1	turquoise
CDA	CDA	1	turquoise
CDADC1	CDADC1	1	turquoise
CDC123	CDC123	1	turquoise
CDC14A	CDC14A	0	grey
CDC14B	CDC14B	1	turquoise
CDC16	CDC16	0	grey
CDC20	CDC20	1	turquoise
CDC23	CDC23	1	turquoise
CDC25A	CDC25A	1	turquoise
CDC25B	CDC25B	1	turquoise
CDC25C	CDC25C	1	turquoise
CDC27	CDC27	1	turquoise
CDC34	CDC34	0	grey
CDC37	CDC37	1	turquoise
CDC37L1	CDC37L1	0	grey
CDC37P1 /// CDC37P1	CDC37P1 /// CDC37P1	0	grey
CDC40	CDC40	0	grey
CDC42	CDC42	0	grey
CDC42BPA	CDC42BPA	0	grey
CDC42BPB	CDC42BPB	0	grey
CDC42EP1	CDC42EP1	0	grey
CDC42EP2	CDC42EP2	0	grey
CDC42EP3	CDC42EP3	1	turquoise
CDC42EP4	CDC42EP4	1	turquoise
CDC42SE1	CDC42SE1	0	grey
CDC45	CDC45	1	turquoise
CDC5L	CDC5L	0	grey
CDC6	CDC6	1	turquoise
CDC7	CDC7	1	turquoise
CDC73	CDC73	0	grey
CDCA3	CDCA3	1	turquoise
CDCA4	CDCA4	1	turquoise
CDCA8	CDCA8	1	turquoise
CDCP1	CDCP1	0	grey
CDH1	CDH1	0	grey
CDH10	CDH10	0	grey
CDH11	CDH11	1	turquoise
CDH12	CDH12	0	grey
CDH13	CDH13	1	turquoise
CDH15	CDH15	0	grey
CDH16	CDH16	0	grey
CDH17	CDH17	0	grey
CDH18	CDH18	0	grey
CDH19	CDH19	1	turquoise
CDH2	CDH2	0	grey
CDH20	CDH20	0	grey
CDH22	CDH22	1	turquoise
CDH3	CDH3	1	turquoise
CDH4	CDH4	0	grey
CDH5	CDH5	0	grey
CDH6	CDH6	0	grey
CDH7	CDH7	0	grey
CDH8	CDH8	0	grey
CDH9	CDH9	0	grey
CDHR1	CDHR1	0	grey
CDHR2	CDHR2	1	turquoise
CDHR5	CDHR5	0	grey
CDIP1	CDIP1	0	grey
CDIPT	CDIPT	0	grey
CDK1	CDK1	1	turquoise
CDK10	CDK10	1	turquoise
CDK11A /// CDK11B	CDK11A /// CDK11B	0	grey
CDK12	CDK12	1	turquoise
CDK13	CDK13	0	grey
CDK14	CDK14	1	turquoise
CDK16	CDK16	0	grey
CDK17	CDK17	1	turquoise
CDK18	CDK18	1	turquoise
CDK19	CDK19	1	turquoise
CDK2	CDK2	1	turquoise
CDK20	CDK20	0	grey
CDK2AP1	CDK2AP1	1	turquoise
CDK2AP2	CDK2AP2	0	grey
CDK3 /// TEN1-CDK3	CDK3 /// TEN1-CDK3	0	grey
CDK4	CDK4	1	turquoise
CDK5	CDK5	1	turquoise
CDK5R1	CDK5R1	0	grey
CDK5R2	CDK5R2	0	grey
CDK5RAP1	CDK5RAP1	1	turquoise
CDK5RAP2	CDK5RAP2	0	grey
CDK5RAP3	CDK5RAP3	1	turquoise
CDK6	CDK6	2	blue
CDK7	CDK7	1	turquoise
CDK8	CDK8	0	grey
CDK9	CDK9	0	grey
CDKAL1	CDKAL1	0	grey
CDKL1	CDKL1	0	grey
CDKL2	CDKL2	0	grey
CDKL3	CDKL3	0	grey
CDKL5	CDKL5	0	grey
CDKN1A	CDKN1A	0	grey
CDKN1B	CDKN1B	0	grey
CDKN1C	CDKN1C	0	grey
CDKN2A	CDKN2A	0	grey
CDKN2AIP	CDKN2AIP	1	turquoise
CDKN2B	CDKN2B	0	grey
[truncated: 11,517 more rows]
