# Supplementary material for: Molecular subtyping of esophageal squamous cell carcinoma by large-scale transcriptional profiling: Characterization, therapeutic targets, and prognostic value
Source: Front Genet. 2022 Nov 8;13:1033214. doi: 10.3389/fgene.2022.1033214 (PMC9678939; doi:10.3389/fgene.2022.1033214)
Supplement: Supplementary file 2 [file Table3.xlsx]

## Sheet: Supplementary file 3
Enrichment of biological pathways in module 0
	ONTOLOGY	ID	Description	GeneRatio	BgRatio	pvalue	p.adjust	qvalue	geneID	Count
GO:0099177	BP	GO:0099177	regulation of trans-synaptic signaling	243/5894	455/18866	2.97e-23	1.68e-19	1.1e-19	ABHD6/ABL1/ACHE/ADCY1/ADCY8/ADCYAP1/ADIPOQ/ADNP/ADORA1/ADRA1A/ADRB2/AGER/AGT/AKAP5/ANAPC2/APBA1/APBA2/ARC/ASIC1/ATF4/ATP2A2/BACE1/BAIAP3/BCR/BDNF/BEGAIN/CA2/CA7/CACNA1B/CACNA1D/CACNB3/CACNG2/CACNG3/CACNG4/CACNG5/CAMK2A/CAMK2B/CBLN1/CCL2/CCR2/CDH1/CDH2/CEL/CHRM2/CHRNA3/CHRNA6/CHRNB2/CHRNB3/CHRNB4/CLN3/CLSTN2/CLSTN3/CNR2/CNTN2/CPLX2/CPLX3/CREB1/CRH/CRHR2/CRTC1/CSPG5/CUX2/CX3CL1/CYP46A1/DBN1/DCC/DGK…	243
GO:0050804	BP	GO:0050804	modulation of chemical synaptic transmission	242/5894	454/18866	5.18e-23	1.68e-19	1.1e-19	ABHD6/ABL1/ACHE/ADCY1/ADCY8/ADCYAP1/ADIPOQ/ADNP/ADORA1/ADRA1A/ADRB2/AGER/AGT/AKAP5/ANAPC2/APBA1/APBA2/ARC/ASIC1/ATF4/ATP2A2/BACE1/BAIAP3/BCR/BDNF/BEGAIN/CA2/CA7/CACNA1B/CACNA1D/CACNB3/CACNG2/CACNG3/CACNG4/CACNG5/CAMK2A/CAMK2B/CBLN1/CCL2/CCR2/CDH1/CDH2/CEL/CHRM2/CHRNA3/CHRNA6/CHRNB2/CHRNB3/CHRNB4/CLN3/CLSTN2/CLSTN3/CNR2/CNTN2/CPLX2/CPLX3/CREB1/CRH/CRHR2/CRTC1/CSPG5/CUX2/CX3CL1/CYP46A1/DBN1/DCC/DGK…	242
GO:0051047	BP	GO:0051047	positive regulation of secretion	180/5894	340/18866	4.77e-17	1.03e-13	6.76e-14	AACS/ABCB11/ACHE/ADAM9/ADCY8/ADCYAP1/ADORA1/AGT/AGTR2/AIMP1/ALOX12B/ANKRD1/AP1G1/APBB1/ATG5/ATP6AP1/AVP/AVPR1A/AVPR1B/BAD/BAIAP3/BMP6/C1QTNF1/C1QTNF3/CACNA1D/CACNA1G/CACNA1I/CADPS/CADPS2/CARTPT/CASR/CCK/CD177/CD33/CDK5R2/CHRNB2/CLASP1/CPB2/CREB1/CRH/CRTAM/CYP19A1/CYP4A11/CYP4F2/DNM1L/DOC2B/DRD2/DRD3/EDN1/F2RL1/FGB/FGFR1/FGR/GAL/GALR1/GAPDH/GCG/GCK/GDNF/GHRH/GHRHR/GIP/GIPR/GJA1/GLMN/GLUD1/GNAI2/GO…	180
GO:0007187	BP	GO:0007187	G protein-coupled receptor signaling pathway	coupled to cyclic nucleotide second messenger	147/5894	263/18866	7.7e-17	1.25e-13	8.19e-14	ADCY1/ADCY2/ADCY7/ADCY8/ADCY9/ADCYAP1/ADCYAP1R1/ADM/ADM2/ADORA1/ADRA1A/ADRA1B/ADRA2A/ADRA2B/ADRA2C/ADRB1/ADRB2/ADRB3/AGT/AGTR2/AKAP5/APLP1/ATP2B4/AVPR2/CACNA1D/CALCA/CALCB/CALCR/CALCRL/CASR/CCL2/CCR3/CHRM2/CHRM3/CHRM4/CHRM5/CNR2/CORT/CRHR1/CRHR2/DRD1/DRD2/DRD3/DRD4/DRD5/EDN1/FLNA/FSHR/GALR1/GALR2/GCG/GCGR/GHRH/GHRHR/GIPR/GLP1R/GLP2R/GNA11/GNA13/GNAI1/GNAI2/GNAL/GNAS/GNAT1/GNAT2/GNAT3/GNAZ/GPR12/G…	147
GO:0007188	BP	GO:0007188	adenylate cyclase-modulating G protein-coupled receptor signaling pathway	131/5894	233/18866	1.97e-15	2.55e-12	1.68e-12	ADCY1/ADCY2/ADCY7/ADCY8/ADCY9/ADCYAP1/ADCYAP1R1/ADM/ADM2/ADORA1/ADRA1A/ADRA1B/ADRA2A/ADRA2B/ADRA2C/ADRB1/ADRB2/ADRB3/AKAP5/APLP1/ATP2B4/AVPR2/CACNA1D/CALCA/CALCB/CALCR/CALCRL/CASR/CCR3/CHRM2/CHRM3/CHRM4/CHRM5/CNR2/CORT/CRHR1/CRHR2/DRD1/DRD2/DRD3/DRD4/DRD5/EDN1/FLNA/FSHR/GALR1/GALR2/GCG/GCGR/GHRH/GHRHR/GIPR/GLP1R/GLP2R/GNA11/GNA13/GNAI1/GNAI2/GNAL/GNAS/GNAT1/GNAT2/GNAT3/GNAZ/GPR12/GPR161/GPR176/GP…	131
GO:0006836	BP	GO:0006836	neurotransmitter transport	128/5894	229/18866	7.57e-15	8.17e-12	5.37e-12	ADCY1/ADRA1A/APBA1/APBA2/ASIC1/ATP2A2/BACE1/BAIAP3/CACNA1B/CACNA1D/CADPS/CADPS2/CAMK2A/CHAT/CHRM2/CHRNA3/CHRNA6/CHRNB2/CHRNB3/CHRNB4/CPLX2/CPLX3/CSPG5/CTBP2/DDC/DNM1L/DOC2A/DOC2B/DRD1/DRD2/DRD3/DRD4/ERC2/GABRA2/GABRQ/GAD1/GAD2/GDNF/GRIK5/GRM4/HRH3/HTR1B/HTR2A/ITGB3/KCNC4/KCNJ10/KCNMB4/LIN7A/LIN7C/MCTP1/NCS1/NF1/NOS1/NRXN2/OTOF/P2RX7/P2RY1/P2RY4/PCLO/PPFIA2/PPFIA3/PPFIA4/PREPL/PRKCG/PSEN1/RAB3A/RA…	128
GO:1903532	BP	GO:1903532	positive regulation of secretion by cell	163/5894	313/18866	9.95e-15	9.21e-12	6.05e-12	AACS/ACHE/ADAM9/ADCY8/ADCYAP1/AGT/AGTR2/AIMP1/ANKRD1/AP1G1/APBB1/ATP6AP1/AVP/AVPR1A/BAD/BAIAP3/BMP6/C1QTNF1/C1QTNF3/CACNA1D/CACNA1G/CACNA1I/CADPS/CADPS2/CARTPT/CASR/CCK/CD177/CD33/CDK5R2/CHRNB2/CLASP1/CPB2/CREB1/CRH/CRTAM/CYP19A1/DNM1L/DOC2B/DRD2/EDN1/F2RL1/FGB/FGFR1/FGR/GAL/GALR1/GAPDH/GCG/GCK/GDNF/GHRH/GHRHR/GIP/GIPR/GJA1/GLMN/GLUD1/GOLPH3/GPI/GPLD1/GPR27/GPR68/HFE/HGS/HLA-E/HTR2B/HYAL3/IFNG/IL…	163
GO:0003015	BP	GO:0003015	heart process	155/5894	297/18866	3.54e-14	2.87e-11	1.89e-11	ABCC9/ACE/ADM/ADORA1/ADORA3/ADRA1A/ADRA1B/ADRB1/AGT/AGTR2/ATG5/ATP1A1/ATP2A1/ATP2A2/ATP2B2/ATP2B3/ATP2B4/AVPR1A/BIN1/BMP10/CACNA1B/CACNA1C/CACNA1D/CACNA1F/CACNA1G/CACNA1S/CACNA2D1/CACNA2D3/CACNB1/CACNB3/CACNG1/CACNG2/CACNG3/CACNG4/CACNG5/CALCA/CASQ1/CAV1/CAV3/CDC42/CHRM2/CLIC2/CORIN/CSRP3/CTNNA3/CXADR/DLG1/DNM1L/DRD2/DSP/EDN1/EPAS1/FGF12/FGF13/FKBP1B/FLNA/FXYD2/FXYD3/FXYD6/FXYD7/FYN/GATA4/GCH1/GJ…	155
GO:0060047	BP	GO:0060047	heart contraction	150/5894	287/18866	7.83e-14	5.38e-11	3.53e-11	ABCC9/ACE/ADM/ADORA1/ADORA3/ADRA1A/ADRA1B/ADRB1/AGT/AGTR2/ATG5/ATP1A1/ATP2A1/ATP2A2/ATP2B2/ATP2B3/ATP2B4/AVPR1A/BIN1/BMP10/CACNA1B/CACNA1C/CACNA1D/CACNA1F/CACNA1G/CACNA1S/CACNA2D1/CACNA2D3/CACNB1/CACNB3/CACNG1/CACNG2/CACNG3/CACNG4/CACNG5/CALCA/CASQ1/CAV1/CAV3/CDC42/CHRM2/CLIC2/CORIN/CSRP3/CTNNA3/CXADR/DLG1/DNM1L/DRD2/DSP/EDN1/EPAS1/FGF12/FGF13/FKBP1B/FLNA/FXYD2/FXYD3/FXYD6/FXYD7/GATA4/GCH1/GJA1/G…	150
GO:0046879	BP	GO:0046879	hormone secretion	161/5894	314/18866	8.31e-14	5.38e-11	3.53e-11	AACS/ABCC8/ACVR2B/ADCY8/ADCYAP1/ADIPOQ/ADM/ADORA1/ADRA2A/ADRA2C/AGT/AGTR2/AIMP1/ALOX5/ARL2/ARNTL/BAD/BAIAP3/BMP6/BMP8A/BRSK2/BTK/C1QTNF1/C1QTNF3/CACNA1C/CACNA1D/CACNA1E/CARTPT/CASR/CCL5/CDK16/CHD7/CPLX3/CPT1A/CREB1/CRH/CRHBP/CRHR1/CYB5R4/CYP19A1/DOC2B/DRD2/EDN1/EPHA5/FFAR2/FGB/FGFR1/FKBP1B/G6PC2/GAL/GALR1/GATA3/GCG/GCK/GDF9/GHRH/GHRHR/GHSR/GIP/GIPR/GJA1/GLP1R/GLUD1/GNAS/GPLD1/GPR27/GPR68/HADH/HFE…	161
GO:0048732	BP	GO:0048732	gland development	212/5894	443/18866	1.14e-13	6.7e-11	4.4e-11	AACS/ABL1/ACO2/ADCYAP1/AIRE/AKT2/ALDH1A2/APRT/ARHGAP35/ASCL1/ASH1L/ASS1/ATM/ATP2C2/ATP7B/BAAT/BCL2/BMP2/BMP4/BMPR1A/CAV1/CAV3/CCDC40/CCL11/CCND1/CDC42/CDH1/CDKN1B/CEBPA/CEBPG/CPB2/CPS1/CREB1/CRH/CRIP1/CRKL/CSF1/CSF1R/CSN2/CSN3/CSNK2B/CTC1/CTNNB1/CYP19A1/CYP7B1/DAG1/DBP/DHODH/DNAAF1/DRD2/E2F8/EDA/EDAR/EGF/ELF5/EPHB3/ERBB4/ESR1/ETS1/FASN/FEM1B/FGF1/FGF8/FGFR1/FGFR2/FGL1/FKBP4/FOXA1/FOXB1/FOXC1/FRS2…	212
GO:0019935	BP	GO:0019935	cyclic-nucleotide-mediated signaling	123/5894	224/18866	1.44e-13	7.04e-11	4.62e-11	ADCY1/ADCY2/ADCY7/ADCY8/ADCY9/ADCYAP1/ADCYAP1R1/ADM/ADM2/ADNP/ADRA1A/ADRA1B/ADRA2A/ADRA2B/ADRA2C/ADRB1/ADRB2/ADRB3/APLNR/APLP1/ATP2B4/CALCA/CALCB/CALCR/CALCRL/CD36/CDC34/CNR2/CRH/CRHR1/CRTC3/DEFB1/DGKQ/DRD1/DRD2/DRD3/DRD5/EPHA5/FSHR/GAL/GALR1/GALR2/GCG/GCGR/GHRH/GHRHR/GIP/GIPR/GLP1R/GNA13/GNAI1/GNAI2/GNAL/GNAS/GPR12/GPR161/GPR3/GPR6/GPR65/GSK3A/GUCA2B/GUCY2F/HTR2B/HTR2C/HTR5A/IAPP/KCNC2/LHCGR/LPA…	123
GO:0009914	BP	GO:0009914	hormone transport	164/5894	323/18866	1.46e-13	7.04e-11	4.62e-11	AACS/ABCC2/ABCC8/ACVR2B/ADCY8/ADCYAP1/ADIPOQ/ADM/ADORA1/ADRA2A/ADRA2C/AGT/AGTR2/AIMP1/ALOX5/ARL2/ARNTL/BAD/BAIAP3/BMP6/BMP8A/BRSK2/BTK/C1QTNF1/C1QTNF3/CACNA1C/CACNA1D/CACNA1E/CARTPT/CASR/CCL5/CDK16/CHD7/CPLX3/CPT1A/CREB1/CRH/CRHBP/CRHR1/CYB5R4/CYP19A1/DOC2B/DRD2/EDN1/EPHA5/FFAR2/FGB/FGFR1/FKBP1B/G6PC2/GAL/GALR1/GATA3/GCG/GCK/GDF9/GHRH/GHRHR/GHSR/GIP/GIPR/GJA1/GLP1R/GLUD1/GNAS/GPLD1/GPR27/GPR68/HA…	164
GO:0046883	BP	GO:0046883	regulation of hormone secretion	141/5894	267/18866	1.52e-13	7.04e-11	4.62e-11	AACS/ABCC8/ADCY8/ADCYAP1/ADIPOQ/ADORA1/ADRA2A/ADRA2C/AGT/AGTR2/AIMP1/ALOX5/ARL2/ARNTL/BAD/BAIAP3/BMP6/BMP8A/BRSK2/C1QTNF1/C1QTNF3/CACNA1C/CACNA1D/CACNA1E/CARTPT/CASR/CCL5/CDK16/CHD7/CPT1A/CREB1/CRH/CRHBP/CRHR1/CYP19A1/DOC2B/DRD2/EDN1/EPHA5/FFAR2/FGB/FGFR1/FKBP1B/G6PC2/GAL/GALR1/GCG/GCK/GDF9/GHRH/GHRHR/GHSR/GIP/GIPR/GJA1/GLP1R/GLUD1/GNAS/GPLD1/GPR27/GPR68/HADH/HFE/HMGN3/HTR1A/HTR2C/IFNG/IL1B/IL6/I…	141
GO:0008217	BP	GO:0008217	regulation of blood pressure	106/5894	187/18866	4.54e-13	1.96e-10	1.29e-10	ACE/ADH5/ADIPOQ/ADM/ADM2/ADORA1/ADRA1A/ADRA1B/ADRA2B/ADRB1/ADRB2/ADRB3/AGT/AGTR2/ATP1A1/ATP6AP2/AVP/AVPR1A/AVPR1B/AVPR2/BBS4/BDKRB1/BMPR2/BRS3/CACNA1B/CALCA/CARTPT/CORIN/CPA3/CRH/CYP11B1/CYP11B2/CYP4A11/CYP4F2/DRD2/DRD3/DRD5/EDN1/ERAP1/ERAP2/F2RL1/GAS6/GCGR/GCH1/GJA1/GJA5/GLP1R/GNB3/GPR37L1/GRIP2/GSK3A/GUCA2B/HSD11B2/ID2/KLK1/KLK2/KLK3/LEP/LNPEP/MC3R/MECP2/MYH6/NAV2/NCALD/NOS1/NOS2/NOS3/NOX1/NPFF…	106
GO:0001505	BP	GO:0001505	regulation of neurotransmitter levels	126/5894	235/18866	7.22e-13	2.76e-10	1.81e-10	ACHE/ADCY1/ADRA1A/ALDH5A1/APBA1/APBA2/ASIC1/ATP2A2/BACE1/BAIAP3/CACNA1B/CACNA1D/CADPS/CADPS2/CAMK2A/CHAT/CHRM2/CHRNA3/CHRNA6/CHRNB2/CHRNB3/CHRNB4/CLN3/COLQ/COMT/CPLX2/CPLX3/CSPG5/CTBP2/DBH/DNM1L/DOC2A/DOC2B/DRD1/DRD2/DRD3/DRD4/ERC2/GABRA2/GAD1/GAD2/GDNF/GRIK5/GRM4/HRH3/HTR1B/HTR2A/ITGB3/KCNC4/KCNJ10/KCNMB4/LIN7A/LIN7C/MCTP1/NAALAD2/NCS1/NF1/NOS1/NRXN2/OTOF/P2RX7/P2RY1/P2RY4/PCLO/PDE1B/PPFIA2/PPFI…	126
GO:1903522	BP	GO:1903522	regulation of blood circulation	154/5894	303/18866	7.23e-13	2.76e-10	1.81e-10	ABCC9/ACE/ADM/ADORA1/ADORA3/ADRA1A/ADRA1B/ADRA2A/ADRA2B/ADRA2C/ADRB1/AGER/AGT/AGTR2/ATP1A1/ATP2A1/ATP2A2/ATP2B2/ATP2B3/ATP2B4/AVP/AVPR1A/AVPR1B/AVPR2/BIN1/BMP10/BMPR2/CACNA1B/CACNA1C/CACNA1D/CACNA1F/CACNA1G/CACNA1S/CACNA2D1/CACNA2D3/CACNB1/CACNB3/CACNG1/CACNG2/CACNG3/CACNG4/CACNG5/CALCA/CASQ1/CASR/CAV1/CAV3/CHRM2/CHRM3/CLIC2/CORIN/CSRP3/CTNNA3/CXADR/DBH/DLG1/DOCK5/DRD2/DSP/EDN1/EPAS1/F2RL1/FGB/FG…	154
GO:0051480	BP	GO:0051480	regulation of cytosolic calcium ion concentration	174/5894	357/18866	2.63e-12	9.47e-10	6.22e-10	ABL1/ACKR2/ACKR4/ADCY8/ADCYAP1/ADCYAP1R1/ADM/ADORA1/ADRA1A/ADRA1B/AGT/APLNR/ATG5/ATP2B2/ATP2B3/ATP2B4/AVP/AVPR1A/AVPR1B/BCL2/BDKRB1/C1QTNF1/C5AR2/CACNA1C/CACNA1D/CACNA2D1/CACNB3/CALCA/CALCB/CALCR/CAPN3/CASQ1/CAV1/CAV3/CCL1/CCL21/CCR10/CCR2/CCR3/CCR4/CCR6/CCR9/CD36/CHD7/CHRNA10/CHRNA9/CIB2/CLIC2/CLN3/CNGB1/CX3CL1/CXCR1/DLG4/DRD1/DRD2/DRD3/EDN1/EPO/ESR1/F2/F2RL1/F2RL2/F2RL3/FAM155A/FAM155B/FASLG/FK…	174
GO:0072503	BP	GO:0072503	cellular divalent inorganic cation homeostasis	226/5894	492/18866	3.4e-12	1.16e-09	7.61e-10	ABL1/ACKR2/ACKR4/ADCY8/ADCYAP1/ADCYAP1R1/ADM/ADORA1/ADRA1A/ADRA1B/AFG3L2/AGT/ANXA6/ANXA7/AP3D1/APLNR/ATF4/ATG5/ATP2A1/ATP2A2/ATP2B2/ATP2B3/ATP2B4/ATP2C2/ATP7B/AVP/AVPR1A/AVPR1B/BCL2/BDKRB1/C1QTNF1/C5AR2/CACNA1C/CACNA1D/CACNA2D1/CACNB3/CALCA/CALCB/CALCR/CAPN3/CASQ1/CASR/CAV1/CAV3/CCDC47/CCL1/CCL11/CCL13/CCL21/CCL23/CCL5/CCR10/CCR2/CCR3/CCR4/CCR6/CCR9/CD36/CDH5/CHD7/CHRNA10/CHRNA9/CIB2/CLIC2/CLN3/C…	226
GO:0019932	BP	GO:0019932	second-messenger-mediated signaling	212/5894	456/18866	3.92e-12	1.27e-09	8.34e-10	ACKR2/ACKR4/ADCY1/ADCY2/ADCY7/ADCY8/ADCY9/ADCYAP1/ADCYAP1R1/ADM/ADM2/ADNP/ADRA1A/ADRA1B/ADRA2A/ADRA2B/ADRA2C/ADRB1/ADRB2/ADRB3/AGT/AGTR2/APLNR/APLP1/ATP2A2/ATP2B4/AVPR1A/BST1/BTK/CACNA1C/CALCA/CALCB/CALCR/CALCRL/CALML4/CALML5/CAMTA1/CASQ1/CCR10/CCR2/CCR3/CCR4/CCR6/CCR9/CD36/CD3E/CDC34/CHRM3/CIB1/CLIC2/CNR2/CRH/CRHR1/CRTC3/CXCR1/DEFB1/DGKQ/DMTN/DRD1/DRD2/DRD3/DRD5/DYRK2/EDN1/EIF2AK3/EPHA5/FKBP1B/F…	212
GO:0030900	BP	GO:0030900	forebrain development	186/5894	391/18866	7.1e-12	2.14e-09	1.4e-09	ADCYAP1/AGTPBP1/ALDH1A2/APAF1/ARHGAP35/ARID1A/ASCL1/ATAT1/ATOH1/ATP2B4/ATRX/AVPR1A/AVPR2/BAD/BBS4/BCAN/BMP2/BMP4/BMPR1A/BTBD3/C21orf91/CASP3/CCDC85C/CDH1/CDH2/CDK5R1/CDK5R2/CDON/CHD5/CHD7/CHRD/CHRNB2/CNP/CNTN2/CREB1/CRH/CRK/CRKL/CSF1R/CTNNB1/DAB1/DCLK2/DCT/DISC1/DKK1/DRD1/DRD2/DYNC2H1/EFHC1/EFNA2/EIF2B3/EMX1/EMX2/EPHA5/EPHB3/ERBB4/ETS1/FABP7/FEZF2/FGF13/FGF8/FGFR1/FGFR2/FLNA/FOXB1/FOXG1/FRS2/FYN/…	186
GO:0006874	BP	GO:0006874	cellular calcium ion homeostasis	211/5894	456/18866	7.66e-12	2.14e-09	1.4e-09	ABL1/ACKR2/ACKR4/ADCY8/ADCYAP1/ADCYAP1R1/ADM/ADORA1/ADRA1A/ADRA1B/AFG3L2/AGT/ANXA6/ANXA7/APLNR/ATF4/ATG5/ATP2A1/ATP2A2/ATP2B2/ATP2B3/ATP2B4/ATP2C2/ATP7B/AVP/AVPR1A/AVPR1B/BCL2/BDKRB1/C1QTNF1/C5AR2/CACNA1C/CACNA1D/CACNA2D1/CACNB3/CALCA/CALCB/CALCR/CAPN3/CASQ1/CASR/CAV1/CAV3/CCDC47/CCL1/CCL11/CCL13/CCL21/CCL23/CCL5/CCR10/CCR2/CCR3/CCR4/CCR6/CCR9/CD36/CDH5/CHD7/CHRNA10/CHRNA9/CIB2/CLIC2/CLN3/CNGB1/C…	211
GO:0042391	BP	GO:0042391	regulation of membrane potential	206/5894	443/18866	7.72e-12	2.14e-09	1.4e-09	ABCD1/ABL1/ACTN2/ADCYAP1/ADORA1/ADRA1A/ADRB1/ADRB2/AKT2/ASIC1/ATP1A1/ATP2A2/BAD/BCL2/BCL2L1/BDNF/BEST2/BIN1/BNIP3L/CACNA1B/CACNA1C/CACNA1D/CACNA1E/CACNA1G/CACNA1I/CACNA2D1/CACNB3/CACNG2/CACNG4/CAV1/CAV3/CBLN1/CCK/CD36/CHRNA1/CHRNA10/CHRNA2/CHRNA3/CHRNA6/CHRNA9/CHRNB1/CHRNB2/CHRNB3/CHRNB4/CHRND/CHRNE/CHRNG/CLCN1/CLIC1/CLN3/CNIH3/CNR2/CNTNAP1/CRTC1/CTNNA3/CUX2/CXADR/DCN/DLD/DLG1/DLG4/DRD1/DRD2/DRD4…	206
GO:0045165	BP	GO:0045165	cell fate commitment	141/5894	278/18866	8.15e-12	2.14e-09	1.4e-09	APC/APC2/ARHGEF2/ASCL1/ATOH1/BATF/BCL2/BMP2/BMP4/BMPR1A/CASP3/CDC42/CDC73/CDON/CHD5/CTNNB1/CTR9/CYLD/CYP26B1/DKK1/EBF2/ELF5/EPAS1/ERBB4/ETS2/EVX1/EYA1/FEV/FEZF2/FGF13/FGF8/FGFR1/FGFR2/FOXA1/FOXC2/FOXG1/FOXP3/FZD7/GAP43/GATA1/GATA3/GATA4/GBX1/GCM1/GDF3/HES1/HEY2/ID2/IFRD1/IL12B/IL12RB1/IL23A/IL6/IRF4/ISL1/JAG1/KDM6B/LATS1/LBX1/LHX3/MGA/MNX1/MTOR/MYF5/MYF6/MYL2/MYOD1/MYOG/MYT1L/NANOG/NEUROD4/NEUROG…	141
GO:0035270	BP	GO:0035270	endocrine system development	76/5894	125/18866	8.25e-12	2.14e-09	1.4e-09	ADCYAP1/ALDH1A2/ARNTL/ASCL1/BAD/BMP2/BMP4/BMP5/BMP6/BMPR1A/CDH1/CREB1/CRH/CRKL/DRD2/EIF2AK3/ETS1/FGF8/FOXO1/GATA3/GCM2/GHRH/GHRHR/GIP/GIPR/GSK3A/HES1/HESX1/HOXA5/HOXB3/IL6/IL6R/INSM1/INSR/ISL1/LHX3/MAPK1/MNX1/MSX1/NEUROG3/NF1/NKX2-1/NKX2-2/NKX2-5/NR0B1/NR5A1/ONECUT1/PAX4/PAX6/PAX8/PDX1/POU1F1/POU3F2/PROP1/RBPJ/RFX3/SALL1/SHH/SIDT2/SIX3/SLC6A3/SMAD2/SMAD3/SMO/SOX2/SOX3/SOX9/SRF/TBX1/TBX19/TG/THRA/…	76
GO:0032147	BP	GO:0032147	activation of protein kinase activity	162/5894	331/18866	9.77e-12	2.43e-09	1.6e-09	ABL1/ACVR2B/ADAM9/ADCY1/ADCY2/ADCY7/ADCY8/ADCY9/ADNP/ADORA1/ADRA2A/ADRA2B/ADRA2C/ADRB2/AGAP2/AGT/ANGPT1/ANGPT4/ATG13/AVPI1/BIRC7/BMP2/BMP4/C5/CALCA/CARTPT/CCL5/CD40LG/CD74/CDK5R1/CHRNA3/CLSPN/CRK/CRKL/CSPG4/DBF4B/DGKQ/DLG1/DRD2/DRD4/DUSP7/EGF/EPO/ERCC6/ERN1/ERN2/ERP29/FGF1/FGF13/FRS2/GADD45A/GAS6/GDF15/GH1/GHR/GNG3/GPRC5A/GPRC5B/GPRC5C/GPRC5D/GRM1/GRM4/HGF/IGFBP6/IL12B/IL1B/IL23A/IL4/IL6R/INS/INS…	162
GO:0055074	BP	GO:0055074	calcium ion homeostasis	214/5894	468/18866	2.16e-11	5.19e-09	3.41e-09	ABL1/ACKR2/ACKR4/ADCY8/ADCYAP1/ADCYAP1R1/ADM/ADORA1/ADRA1A/ADRA1B/AFG3L2/AGT/ANXA6/ANXA7/APLNR/ATF4/ATG5/ATP2A1/ATP2A2/ATP2B2/ATP2B3/ATP2B4/ATP2C2/ATP6V1B1/ATP7B/AVP/AVPR1A/AVPR1B/BCL2/BDKRB1/C1QTNF1/C5AR2/CACNA1C/CACNA1D/CACNA2D1/CACNB3/CALCA/CALCB/CALCR/CAPN3/CASQ1/CASR/CAV1/CAV3/CCDC47/CCL1/CCL11/CCL13/CCL21/CCL23/CCL5/CCR10/CCR2/CCR3/CCR4/CCR6/CCR9/CD36/CDH5/CHD7/CHRNA10/CHRNA9/CIB2/CLIC2/CLN…	214
GO:0006936	BP	GO:0006936	muscle contraction	173/5894	362/18866	2.39e-11	5.54e-09	3.64e-09	ACTA1/ACTN2/ADORA1/ADRA1A/ADRA1B/ADRA2A/ADRA2B/ADRA2C/ADRB2/AGT/ALDOA/ANKRD2/ANXA6/ARHGEF11/ATP1A1/ATP2A1/ATP2A2/ATP2B4/ATP8A2/BIN1/BMP10/CACNA1C/CACNA1D/CACNA1G/CACNA1S/CACNA2D1/CALCA/CALCRL/CALD1/CASQ1/CAV1/CAV3/CHRM2/CHRM3/CHRNA1/CHRNA3/CHRNB1/CHRNB2/CHRNB4/CHRND/CHRNE/CHRNG/CHUK/CLCN1/CLIC2/COMP/CSRP3/CTNNA3/DLG1/DOCK5/DRD1/DRD2/DSP/DTNA/DYSF/EDN1/EEF2/EMD/FGF12/FGF13/FKBP1B/FLNA/GALR2/GAMT/G…	173
GO:0007601	BP	GO:0007601	visual perception	115/5894	218/18866	2.85e-11	6.36e-09	4.18e-09	ABCA4/AIPL1/AOC2/ARR3/ATF6/ATP8A2/BBS1/BBS10/BBS4/BBS7/BBS9/BEST1/BFSP2/CABP1/CABP2/CACNA1F/CEP250/CHM/CHRNB2/CLN6/CNGB1/CNGB3/CPLX3/CRB1/CRX/CRYAA/CRYBA1/CRYBA2/CRYBA4/CRYBB1/CRYBB2/CRYBB3/CRYGA/CRYGB/CRYGC/CRYGD/CRYZ/CYP1B1/EFEMP1/EPAS1/EYA4/FSCN2/GABRR2/GJA3/GJD2/GLRA1/GLRB/GNAT1/GNAT2/GPR143/GRK1/GRM6/GRM8/GUCA1B/GUCY2F/HPS1/HSF4/IMPG1/IMPG2/KCNJ10/KERA/KIFC3/KRT12/LAMC3/MIP/MYO3A/MYO9A/NDP/N…	115
GO:0050953	BP	GO:0050953	sensory perception of light stimulus	116/5894	222/18866	5.17e-11	1.12e-08	7.33e-09	ABCA4/AIPL1/AOC2/ARR3/ATF6/ATP8A2/BBS1/BBS10/BBS4/BBS7/BBS9/BEST1/BFSP2/CABP1/CABP2/CACNA1F/CEP250/CHM/CHRNB2/CLN6/CNGB1/CNGB3/CPLX3/CRB1/CRX/CRYAA/CRYBA1/CRYBA2/CRYBA4/CRYBB1/CRYBB2/CRYBB3/CRYGA/CRYGB/CRYGC/CRYGD/CRYZ/CYP1B1/EFEMP1/EPAS1/EYA4/FSCN2/GABRR2/GJA3/GJD2/GLRA1/GLRB/GNAT1/GNAT2/GPR143/GRK1/GRM6/GRM8/GUCA1B/GUCY2F/HPS1/HSF4/IMPG1/IMPG2/KCNJ10/KERA/KIFC3/KRT12/LAMC3/MIP/MYO3A/MYO9A/NDP/N…	116
GO:0051961	BP	GO:0051961	negative regulation of nervous system development	155/5894	319/18866	5.47e-11	1.12e-08	7.38e-09	ADCYAP1/APPL2/ARHGAP4/ARHGDIA/ARHGEF15/ARHGEF2/ASCL1/ASCL2/BAG5/BCL11A/BDNF/BMPR1A/BRINP1/CBFA2T2/CBLN1/CCL11/CDK5R1/CDK5RAP2/CDKL3/CEND1/CIB1/CNTF/CNTN2/CTNNB1/CX3CL1/DAB1/DCC/DDX6/DICER1/DIO3/DKK1/DLL3/DNM3/DPYSL3/DRD3/EFNB2/EFNB3/EIF2AK3/EIF4ENIF1/EPHA4/EPHA7/ERBB4/F2/FEZF2/FGF13/FKBP4/FOXG1/FSTL4/GDF11/GFI1/GNRH1/GPR161/GPR173/GPR37L1/GSK3A/HDAC2/HES1/HMG20A/ID1/ID2/IDH2/IFRD1/IFT122/IL1B/IL6…	155
GO:0045926	BP	GO:0045926	negative regulation of growth	129/5894	254/18866	5.55e-11	1.12e-08	7.38e-09	ACVR1B/ADAM15/ADRB1/ADRB2/AGT/AGTR2/APBB1/ARHGAP4/BCL11A/BCL2/BDKRB1/BMP10/BMP4/BMPR2/CAV3/CCAR2/CCDC85B/CDK5R1/CDKL3/CDKN1A/CDKN1B/CDKN2A/CDKN2C/CDKN2D/CRLF3/CTDP1/CXADR/DCBLD2/DCC/DDX3X/DNAJB2/EI24/EPHA7/ESR2/FGF13/FGFR3/FRZB/FSTL4/GDF15/GDF2/GDF9/GJA1/GNG4/GPC3/GSK3A/HRG/HYAL1/HYAL2/IFRD1/IGFBP5/ING1/ING4/IP6K2/JARID2/KCNK2/KIAA0319/LGMN/MAG/MAP2/MAPK11/MEG3/MSTN/MSX1/MT1E/MT1F/MT1G/MT1H/MT1M/…	129
GO:0043010	BP	GO:0043010	camera-type eye development	160/5894	332/18866	5.98e-11	1.17e-08	7.71e-09	ACHE/ACVR2B/AHI1/ALDH1A2/ARHGAP35/ARHGEF15/ARID1A/ATF4/ATP2B4/ATP8A2/B9D1/BBS4/BCAR3/BFSP1/BFSP2/BMP4/BMPR1B/BMPR2/CACNA1C/CDKN1B/CDON/CHD7/COL8A1/COL8A2/CRB1/CRYBA1/CRYBA2/CRYBA4/CRYBB1/CRYBB2/CRYBB3/CRYGA/CRYGB/CRYGC/CRYGD/CTNNB1/CYP1B1/DIO3/DLG1/DRD2/DSCAM/EFEMP1/EPHB1/FLT1/FOXC1/FOXC2/FOXE3/FOXF2/FRS2/FZD5/FZR1/GATA3/GDF11/GJA8/GNAT1/GNAT2/GPD2/GPM6A/GRHL2/GRM6/HDAC2/HMGN1/HPCA/HSF4/IFT122/IF…	160
GO:0098657	BP	GO:0098657	import into cell	119/5894	230/18866	6.7e-11	1.28e-08	8.38e-09	ABCC9/ACSL1/ACTB/AGT/AKT2/ARC/ATP12A/ATP1A1/ATP2B4/CACNA2D1/CACNG2/CACNG3/CACNG4/CACNG5/CALCR/CALY/CD36/DLG1/DNM2/DNM3/DRD1/DRD2/DRD3/DRD4/EFNB2/FABP3/FAM155A/FAM155B/FXYD2/FYN/GDNF/HCN4/HFE/HPCA/IFNG/IRS2/ISCU/ITGB3/KCNJ1/KCNJ10/KCNJ13/KCNJ14/KCNJ15/KCNJ16/KCNJ2/KCNJ3/KCNJ4/KCNJ5/KCNJ6/KCNJ8/KCNJ9/LRP2/LTF/NOS1/NOX5/NTSR1/OPHN1/PSEN1/RAB3B/RAMP3/RGS4/RPS6KB1/SCRIB/SLC12A1/SLC12A2/SLC12A3/SLC12A4…	119
GO:0042493	BP	GO:0042493	response to drug	185/5894	397/18866	7.22e-11	1.34e-08	8.78e-09	AACS/ABCA2/ABCA3/ABCB11/ABCC2/ABCC3/ACSL1/ADAM9/ADCY1/ADCYAP1R1/ADIPOQ/ADRA1A/AMELX/ANKRD1/AOC1/APOA2/APOBEC1/ASS1/ATG5/ATP1A1/ATP8B1/BAD/BCAR3/BCL2/BDNF/CASP3/CCND1/CCNO/CD69/CDH1/CDK9/CDKN1A/CDKN1B/CHUK/COMT/CPB2/CPS1/CPT1A/CREB1/CRH/CRHBP/CRKL/CTNNB1/CYP1A2/CYP2A13/CYP2A6/CYP2A7/CYP2B6/CYP2F1/CYP2R1/CYP2U1/CYP2W1/DAB1/DAD1/DDC/DHODH/DNMT3A/DPEP1/DRD1/DRD2/DRD3/EDN1/EEF2/EMX1/EMX2/ENG/ENO3/F7/F…	185
GO:0018108	BP	GO:0018108	peptidyl-tyrosine phosphorylation	176/5894	374/18866	7.84e-11	1.41e-08	9.27e-09	AATK/ABL1/ACE/ADIPOQ/ADNP/ADORA1/ADRA1A/ADRA2A/AGT/ANGPT1/ANGPT4/ARHGEF2/BDNF/BMP6/BST1/BTK/CADM4/CASS4/CAV1/CBL/CBLC/CCK/CCL5/CD36/CD3E/CD44/CD74/CHMP6/CLK1/CLK3/CLK4/CNOT7/CNTF/CNTN1/CRLF1/CSF1R/CSF2/CSF3/CSH1/CSPG4/CTF1/DGKQ/DLG4/DMTN/DSTYK/DYRK1B/DYRK2/DYRK4/EFEMP1/EGF/EHD4/ENPP2/EPHA4/EPHA5/EPHA7/EPHB1/EPHB3/EPO/ERBB4/ERCC6/FCGR1A/FES/FGF8/FGFR1/FGFR2/FGFR3/FGFR4/FGR/FLT1/FLT3/FLT4/FRK/FYN/G…	176
GO:0007409	BP	GO:0007409	axonogenesis	217/5894	482/18866	9.25e-11	1.62e-08	1.06e-08	ABL1/ACTB/ADCY1/ADNP/AFG3L2/ANAPC2/APBB1/ARHGAP35/ARHGAP4/ARHGDIA/ATOH1/ATP8A2/B4GALT6/BCL2/BDNF/BMPR1B/BMPR2/BRSK2/CCK/CDH2/CDH4/CDK5R1/CDKL3/CDKL5/CHL1/CHRNB2/CNP/CNTN2/CNTN6/CREB1/CSF1R/CTNNA2/DAB1/DAG1/DBN1/DCC/DISC1/DNM2/DOK1/DOK2/DOK5/DPYSL2/DRD2/DSCAM/EFNA2/EFNA3/EFNB2/EFNB3/EPHA4/EPHA5/EPHA7/EPHB1/EPHB3/ETV1/FEZ2/FEZF2/FGF13/FGF8/FGFR2/FLRT3/FOXB1/FOXG1/FRS2/FSTL4/FYN/FZD3/GAP43/GATA3/GBX…	217
GO:0008016	BP	GO:0008016	regulation of heart contraction	129/5894	256/18866	1.09e-10	1.82e-08	1.2e-08	ABCC9/ADM/ADORA1/ADORA3/ADRA1A/ADRA1B/ADRB1/AGT/AGTR2/ATP1A1/ATP2A1/ATP2A2/ATP2B2/ATP2B3/ATP2B4/AVPR1A/BIN1/BMP10/CACNA1B/CACNA1C/CACNA1D/CACNA1F/CACNA1G/CACNA1S/CACNA2D1/CACNA2D3/CACNB1/CACNB3/CACNG1/CACNG2/CACNG3/CACNG4/CACNG5/CALCA/CASQ1/CAV1/CAV3/CHRM2/CLIC2/CORIN/CSRP3/CTNNA3/CXADR/DLG1/DRD2/DSP/EDN1/EPAS1/FGF13/FKBP1B/FLNA/FXYD2/FXYD3/FXYD6/FXYD7/GATA4/GCH1/GJA1/GJA5/GLP1R/GSK3A/GSTM2/HCN4/…	129
GO:0048568	BP	GO:0048568	embryonic organ development	205/5894	451/18866	1.1e-10	1.82e-08	1.2e-08	ADM/AHI1/ALDH1A2/ALX1/ALX3/ALX4/ARID1A/ARNT/ASCL2/ATF4/ATOH1/ATP6V1B1/ATP8A2/BBS4/BBS7/BCR/BMP4/BMP5/BMPR1A/CASP8/CCDC134/CCDC40/CDX2/CEBPA/CELSR1/CHD7/CHRNA10/CHRNA9/CITED1/CSF2/CTNNB1/DLG1/DLX6/DNAAF1/DNAJB6/E2F8/EDN1/EFEMP1/EGLN1/ENG/EPAS1/EPN1/ERCC1/ERCC2/EYA1/FGF8/FGF9/FGFR1/FGFR2/FLT3LG/FOXC1/FOXC2/FOXF2/FOXG1/FOXH1/FOXI1/FRS2/FRZB/FUZ/FZD3/FZD5/GATA1/GATA3/GATA4/GBX2/GCM1/GDF3/GDNF/GJA5/GN…	205
GO:0003012	BP	GO:0003012	muscle system process	211/5894	467/18866	1.14e-10	1.84e-08	1.21e-08	ACTA1/ACTN2/ADORA1/ADRA1A/ADRA1B/ADRA2A/ADRA2B/ADRA2C/ADRB2/AGT/AGTR2/AIF1/ALDOA/ANKRD2/ANXA6/ARHGEF11/ATP1A1/ATP2A1/ATP2A2/ATP2B4/ATP8A2/BIN1/BMP10/CACNA1C/CACNA1D/CACNA1G/CACNA1S/CACNA2D1/CALCA/CALCRL/CALD1/CAMK2B/CAMTA2/CASQ1/CAV1/CAV3/CDK9/CHRM2/CHRM3/CHRNA1/CHRNA3/CHRNB1/CHRNB2/CHRNB4/CHRND/CHRNE/CHRNG/CHUK/CLCN1/CLIC2/COMP/CSRP3/CTDP1/CTNNA3/DAG1/DLG1/DOCK5/DRD1/DRD2/DSP/DTNA/DYSF/EDN1/EEF2…	211
GO:0002791	BP	GO:0002791	regulation of peptide secretion	178/5894	381/18866	1.28e-10	2.02e-08	1.32e-08	AACS/ABCC8/ACHE/ADAM9/ADCY8/ADCYAP1/ADORA1/ADRA2A/ADRA2C/ADTRP/AGTR2/AIMP1/ALOX5/ANKRD1/APBB1/ARL2/ARNTL/BAD/BAIAP3/BMP6/BMP8A/BRSK2/BTN2A2/C1QTNF3/CACNA1C/CACNA1D/CACNA1E/CARTPT/CASR/CCL5/CD200/CD33/CD40LG/CD74/CDK16/CHD7/CPT1A/CRH/CRHBP/CRTAM/DNM1L/DOC2B/DRD2/DRD3/DRD4/EPHA5/ERP29/F2RL1/FCGR2B/FFAR2/FGB/FGR/FKBP1B/FOXP3/G6PC2/GAPDH/GCG/GCK/GHRH/GHRHR/GHSR/GIP/GIPR/GJA1/GJA5/GLMN/GLP1R/GLUD1/GOL…	178
GO:0048638	BP	GO:0048638	regulation of developmental growth	167/5894	353/18866	1.43e-10	2.18e-08	1.43e-08	ABL1/ADNP/ADRB1/ADRB2/AFG3L2/ANAPC2/ARHGAP4/ATP8A2/BBS4/BCL11A/BCL2/BDNF/BMP10/BMP4/BMPR1A/BMPR2/CAPN3/CAV3/CDH4/CDK5R1/CDKL3/CDKL5/CDKN1A/CDKN1B/CHD7/COLQ/CPNE6/CREB1/CSF1/CTDP1/CXADR/DBN1/DCC/DIO3/DISC1/DNM2/DPYSL2/DRD2/DRD3/DSCAM/EDN1/EPHA7/ERBB4/FGF13/FGF20/FGF8/FGF9/FGFR1/FGFR2/FGFR3/FOXC1/FOXC2/FSTL4/GAMT/GDF15/GDF5/GH1/GHR/GHRH/GHRHR/GHSR/GJA1/GPR21/GSK3A/HEY2/IFRD1/INSR/IST1/JARID2/KCNK2/…	167
GO:0050806	BP	GO:0050806	positive regulation of synaptic transmission	94/5894	172/18866	1.47e-10	2.18e-08	1.43e-08	ABL1/ADCY1/ADCY8/ADCYAP1/ADORA1/ADRA1A/ADRB2/AGER/AKAP5/ARC/BAIAP3/CA2/CA7/CACNA1D/CACNB3/CACNG2/CACNG3/CACNG4/CACNG5/CCL2/CCR2/CHRNB2/CLSTN2/CLSTN3/CREB1/CRH/CRHR2/CRTC1/CUX2/CYP46A1/DLG4/DNM1L/DRD1/DRD2/DRD4/EPHA4/GIP/GRIK2/GRIN1/GRIN2A/GRIN2B/GRIN2C/GRIN2D/HAP1/IGSF9B/INS/KCTD13/KIF5B/KISS1/LGMN/LRRTM2/MAPK1/MECP2/MPP2/NF1/NLGN3/NPTN/NR2E1/NRGN/NTRK1/NTSR1/OXT/OXTR/PLK2/PRKCE/PRKCZ/PTEN/PTGS2/…	94
GO:0099003	BP	GO:0099003	vesicle-mediated transport in synapse	114/5894	220/18866	1.48e-10	2.18e-08	1.43e-08	ACTB/ADCY1/ADRA1A/AMPH/AP3D1/APBA1/APBA2/ARC/ATP2A2/BACE1/BRSK2/BSN/CACNA1D/CADPS/CADPS2/CALY/CANX/CDH2/CDK5R1/CEL/CHRM2/CHRNA6/CHRNB2/CHRNB3/CPLX2/CPLX3/CSPG5/CTBP2/CTNNB1/DDC/DGKQ/DNAJC6/DNM1L/DNM2/DNM3/DOC2A/DOC2B/DRD1/DRD2/DRD3/DRD4/EFNB2/ERC2/GRIK5/GRIP1/GRIP2/HPCA/HTR1B/HTR2A/ITGB3/MAGI2/MAPK10/NCS1/NLGN3/NLGN4X/NLGN4Y/OPHN1/OTOF/P2RX7/P2RY1/P2RY4/PCLO/PICALM/PLAA/PPFIA2/PPFIA3/PPP3CB/PREPL…	114
GO:0018212	BP	GO:0018212	peptidyl-tyrosine modification	176/5894	377/18866	1.74e-10	2.51e-08	1.65e-08	AATK/ABL1/ACE/ADIPOQ/ADNP/ADORA1/ADRA1A/ADRA2A/AGT/ANGPT1/ANGPT4/ARHGEF2/BDNF/BMP6/BST1/BTK/CADM4/CASS4/CAV1/CBL/CBLC/CCK/CCL5/CD36/CD3E/CD44/CD74/CHMP6/CLK1/CLK3/CLK4/CNOT7/CNTF/CNTN1/CRLF1/CSF1R/CSF2/CSF3/CSH1/CSPG4/CTF1/DGKQ/DLG4/DMTN/DSTYK/DYRK1B/DYRK2/DYRK4/EFEMP1/EGF/EHD4/ENPP2/EPHA4/EPHA5/EPHA7/EPHB1/EPHB3/EPO/ERBB4/ERCC6/FCGR1A/FES/FGF8/FGFR1/FGFR2/FGFR3/FGFR4/FGR/FLT1/FLT3/FLT4/FRK/FYN/G…	176
GO:0035637	BP	GO:0035637	multicellular organismal signaling	108/5894	206/18866	1.83e-10	2.57e-08	1.69e-08	ABCC9/AGT/ATP1A1/ATP2A1/ATP2A2/ATP2B2/ATP2B3/ATP2B4/AVP/AVPR1A/BIN1/CACNA1C/CACNA1D/CACNA1F/CACNA1G/CACNA1I/CACNA1S/CACNA2D1/CACNA2D3/CACNB1/CACNB3/CACNG1/CACNG2/CACNG3/CACNG4/CACNG5/CARTPT/CASQ1/CAV1/CHRM5/CHRNA1/CHRNB4/CLCN1/CNTNAP1/CORIN/CTNNA3/CXADR/DRD1/DRD5/DSP/FGF12/FKBP1B/FLNA/FXYD2/FXYD3/FXYD6/FXYD7/GHSR/GJA1/GJA5/GLRA1/GPR88/GRIK2/HCN4/ITGA2/JUP/KCNA1/KCNA2/KCND1/KCNE1/KCNE4/KCNH6/KCNIP…	108
GO:0045776	BP	GO:0045776	negative regulation of blood pressure	36/5894	47/18866	1.99e-10	2.7e-08	1.78e-08	ADIPOQ/ADM2/ADORA1/ADRA1A/ADRB1/ADRB2/ADRB3/AGTR2/BBS4/BDKRB1/BMPR2/CALCA/CRH/DRD2/DRD3/DRD5/GCH1/GJA5/GPR37L1/GUCA2B/NOS1/NOS2/NOS3/NPPA/NPPB/NTSR1/OPRL1/OXT/PPARA/PRCP/PTAFR/RNLS/RNPEP/SCPEP1/SNX5/VEGFC	36
GO:0019933	BP	GO:0019933	cAMP-mediated signaling	105/5894	199/18866	2e-10	2.7e-08	1.78e-08	ADCY1/ADCY2/ADCY7/ADCY8/ADCY9/ADCYAP1/ADCYAP1R1/ADM/ADM2/ADRA1A/ADRA1B/ADRA2A/ADRA2B/ADRA2C/ADRB1/ADRB2/ADRB3/APLNR/APLP1/ATP2B4/CALCA/CALCB/CALCR/CALCRL/CDC34/CNR2/CRH/CRHR1/CRTC3/DEFB1/DGKQ/DRD1/DRD2/DRD3/DRD5/EPHA5/FSHR/GAL/GALR1/GALR2/GCG/GCGR/GHRH/GHRHR/GIP/GIPR/GLP1R/GNA13/GNAI1/GNAI2/GNAL/GNAS/GPR12/GPR161/GPR3/GPR6/GPR65/GSK3A/HTR5A/IAPP/LHCGR/LPAR2/LPAR3/MC2R/MC3R/MC4R/MC5R/MGRN1/NOS1/NP…	105
GO:0048880	BP	GO:0048880	sensory system development	182/5894	394/18866	2.49e-10	3.3e-08	2.17e-08	ACHE/ACVR2B/AGTPBP1/AHI1/ALDH1A2/ARHGAP35/ARHGEF15/ARID1A/ATF4/ATF6/ATP2B4/ATP8A2/B9D1/BBS4/BBS7/BCAR3/BCL2/BDNF/BFSP1/BFSP2/BMP4/BMP6/BMPR1B/BMPR2/C3/CACNA1C/CDKN1B/CDON/CHD7/CNTF/COL8A1/COL8A2/CRB1/CRYBA1/CRYBA2/CRYBA4/CRYBB1/CRYBB2/CRYBB3/CRYGA/CRYGB/CRYGC/CRYGD/CTNNB1/CYP1B1/DIO3/DLG1/DRD2/DSCAM/EFEMP1/EPHB1/FASLG/FGF9/FLT1/FOXC1/FOXC2/FOXE3/FOXF2/FRS2/FSCN2/FZD5/FZR1/GATA3/GDF11/GDF3/GJA8/GN…	182
GO:0050731	BP	GO:0050731	positive regulation of peptidyl-tyrosine phosphorylation	103/5894	195/18866	2.74e-10	3.47e-08	2.28e-08	ABL1/ACE/ADIPOQ/ADNP/ADORA1/ADRA1A/ADRA2A/AGT/ANGPT1/ANGPT4/ARHGEF2/BDNF/BMP6/CASS4/CCK/CCL5/CD36/CD3E/CD44/CD74/CNTF/CNTN1/CRLF1/CSF1R/CSF2/CSF3/CSH1/CSPG4/CTF1/DGKQ/DLG4/EGF/EHD4/ENPP2/EPHA4/EPO/ERBB4/ERCC6/FCGR1A/FGF8/FGFR3/FLT3/FYN/GAS6/GATA1/GH1/GH2/GHR/GPRC5B/GRM5/HAX1/HCLS1/HDAC2/HES1/HGF/HPX/HTR2A/IFNA2/IFNG/IL12B/IL13/IL15/IL21/IL23A/IL3/IL4/IL5/IL6/IL6R/IQGAP1/ISL1/ITGB3/KITLG/LEP/LIF/L…	103
GO:0007204	BP	GO:0007204	positive regulation of cytosolic calcium ion concentration	154/5894	322/18866	2.76e-10	3.47e-08	2.28e-08	ABL1/ACKR2/ACKR4/ADCY8/ADCYAP1/ADCYAP1R1/ADM/ADRA1A/ADRA1B/AGT/APLNR/ATG5/ATP2B4/AVP/AVPR1A/AVPR1B/BCL2/BDKRB1/C1QTNF1/C5AR2/CACNA1C/CACNA1D/CACNA2D1/CACNB3/CALCA/CALCR/CAPN3/CASQ1/CAV1/CAV3/CCL1/CCL21/CCR10/CCR2/CCR3/CCR4/CCR6/CCR9/CD36/CHD7/CHRNA10/CHRNA9/CIB2/CLIC2/CX3CL1/CXCR1/DLG4/DRD1/DRD2/DRD3/EDN1/EPO/ESR1/F2/F2RL1/F2RL2/F2RL3/FAM155A/FAM155B/FASLG/FKBP1B/FYN/GALR1/GALR2/GIPR/GJA1/GLP1R/G…	154
GO:0001654	BP	GO:0001654	eye development	178/5894	384/18866	2.78e-10	3.47e-08	2.28e-08	ACHE/ACVR2B/AGTPBP1/AHI1/ALDH1A2/ARHGAP35/ARHGEF15/ARID1A/ATF4/ATF6/ATP2B4/ATP8A2/B9D1/BBS4/BBS7/BCAR3/BCL2/BDNF/BFSP1/BFSP2/BMP4/BMP6/BMPR1B/BMPR2/CACNA1C/CDKN1B/CDON/CHD7/CNTF/COL8A1/COL8A2/CRB1/CRYBA1/CRYBA2/CRYBA4/CRYBB1/CRYBB2/CRYBB3/CRYGA/CRYGB/CRYGC/CRYGD/CTNNB1/CYP1B1/DIO3/DLG1/DRD2/DSCAM/EFEMP1/EPHB1/FASLG/FGF9/FLT1/FOXC1/FOXC2/FOXE3/FOXF2/FRS2/FSCN2/FZD5/FZR1/GATA3/GDF11/GDF3/GJA8/GNAT1…	178
GO:0048608	BP	GO:0048608	reproductive structure development	200/5894	443/18866	3.77e-10	4.61e-08	3.03e-08	ADAM15/ADAM19/ADAM20/ADAM21/ADCYAP1/ADM/AFP/AMHR2/ARID1A/ARID4B/ARNT/ASB1/ASCL2/ASH1L/ATM/ATRX/BCL2/BCL2L1/BMP4/BMP5/BMP6/BMPR1B/BMPR2/CASP3/CASP8/CBL/CCDC134/CCND1/CDKN1B/CDX2/CEBPA/CHD7/CITED1/CRIP1/CRKL/CSF2/CTNNB1/CTSV/CUL7/CYP19A1/CYP7B1/DCN/DLG1/DMC1/DMRT1/DNAJB6/E2F8/EGLN1/EIF2B2/EPAS1/EPOR/ERCC1/ESR1/ETNK2/FEM1B/FGF8/FGF9/FGFR2/FKBP4/FLNA/FNDC3A/FOSL1/FOXA1/FOXC1/FOXF2/FRS2/FSHB/FSHR/FZD5…	200
GO:0150063	BP	GO:0150063	visual system development	179/5894	388/18866	3.97e-10	4.75e-08	3.12e-08	ACHE/ACVR2B/AGTPBP1/AHI1/ALDH1A2/ARHGAP35/ARHGEF15/ARID1A/ATF4/ATF6/ATP2B4/ATP8A2/B9D1/BBS4/BBS7/BCAR3/BCL2/BDNF/BFSP1/BFSP2/BMP4/BMP6/BMPR1B/BMPR2/C3/CACNA1C/CDKN1B/CDON/CHD7/CNTF/COL8A1/COL8A2/CRB1/CRYBA1/CRYBA2/CRYBA4/CRYBB1/CRYBB2/CRYBB3/CRYGA/CRYGB/CRYGC/CRYGD/CTNNB1/CYP1B1/DIO3/DLG1/DRD2/DSCAM/EFEMP1/EPHB1/FASLG/FGF9/FLT1/FOXC1/FOXC2/FOXE3/FOXF2/FRS2/FSCN2/FZD5/FZR1/GATA3/GDF11/GDF3/GJA8/GN…	179
GO:0007611	BP	GO:0007611	learning or memory	129/5894	260/18866	4.03e-10	4.75e-08	3.12e-08	AAAS/ABCA7/ACTR2/ADAM2/ADCY1/ADCY8/ADNP/AFF2/AGER/AGT/ARC/ASIC1/ATXN1/BDNF/BRINP1/C1QL1/CAMK4/CASP3/CCK/CCL11/CHRNB2/CLN3/CNTN2/COMT/CREB1/CRH/CRHBP/CRTC1/CUX2/DBH/DDHD2/DKK1/DLG4/DRD1/DRD2/DRD3/DRD5/EP300/FGF13/FOSL1/FOXB1/FYN/FZD9/GABRA5/GALR2/GHSR/GIP/GLP1R/GM2A/GPR88/GRIA1/GRIN1/GRIN2A/GRIN2B/GRM5/GRPR/HRH2/HTR2A/INSR/JPH3/KALRN/KCNK10/KCNK2/KMT2B/KRAS/LDLR/LGMN/MAPK1/MAPK8IP2/MECP2/MTOR/MUSK…	129
GO:0060078	BP	GO:0060078	regulation of postsynaptic membrane potential	81/5894	144/18866	4.19e-10	4.85e-08	3.18e-08	ADCYAP1/ADORA1/ADRB1/ADRB2/BDNF/CACNB3/CBLN1/CHRNA1/CHRNA10/CHRNA2/CHRNA3/CHRNA6/CHRNA9/CHRNB1/CHRNB2/CHRNB3/CHRNB4/CHRND/CHRNE/CHRNG/CUX2/DLG4/DRD2/DRD4/GABRA1/GABRA2/GABRA3/GABRA4/GABRA5/GABRB1/GABRB2/GABRB3/GABRD/GABRG2/GABRG3/GABRR2/GLRA1/GLRA2/GLRA3/GLRB/GRIA1/GRIA3/GRIK1/GRIK2/GRIK3/GRIK4/GRIK5/GRIN1/GRIN2A/GRIN2B/GRIN2C/GRIN2D/GRM1/GRM5/GSK3A/IGSF9B/KCNA1/MAPK8IP2/MECP2/MPP2/NLGN3/NLGN4X/N…	81
GO:0050769	BP	GO:0050769	positive regulation of neurogenesis	215/5894	485/18866	6.08e-10	6.91e-08	4.54e-08	ACTR2/ADCYAP1/ADNP/ADRA2B/ADRA2C/AGT/ANAPC2/ANKRD1/ANKRD27/APBB1/ARHGAP35/ARHGDIA/ARHGEF2/ASCL1/ATF1/ATOH1/ATP8A2/BCL2/BDNF/BIN1/BMP2/BMP4/BMP5/BMP6/BMPR2/BRINP1/BRINP2/BRINP3/C21orf91/CAMK2B/CAPRIN1/CBFA2T2/CCR2/CDH4/CDKL3/CDKL5/CDON/CNTF/CNTN1/CPNE6/CRKL/CRTC1/CSF1/CSNK1D/CSNK1E/CTNNB1/CUL7/CUX2/CX3CL1/DAB1/DAG1/DBN1/DCT/DICER1/DISC1/DKK1/DLG4/DLG5/DNM1L/DPYSL3/DRD2/DSCAM/ELL3/EP300/EPHA4/EPO/F…	215
GO:0051222	BP	GO:0051222	positive regulation of protein transport	165/5894	354/18866	7.46e-10	8.33e-08	5.47e-08	AACS/ACHE/ADAM9/ADCY8/AGTR2/AKAP5/AKT2/ANKRD1/APBB1/ARHGEF5/ARIH2/ATG13/BAD/BAG3/BAIAP3/BAP1/BCAS3/BCL2/BMP6/C1QTNF3/C2CD5/CACNB3/CASP8/CASR/CD33/CDC42/CDH1/CDK5R1/CIB1/CLN3/CRH/CRTAM/DNM1L/DOC2B/DRD2/EDEM1/EMD/F2RL1/FGB/FGR/FLNA/FYN/FZD5/GAPDH/GAS6/GCG/GCK/GIP/GIPR/GJA1/GLMN/GLUD1/GOLPH3/GPI/GPLD1/GPR27/GPR68/GSK3A/HCLS1/HDAC3/HLA-E/HPCA/HRAS/HSPA1L/HTR2B/HUWE1/HYAL2/IFNG/IL13/IL1B/IL26/IL5/IL6/…	165
GO:0050768	BP	GO:0050768	negative regulation of neurogenesis	142/5894	295/18866	7.81e-10	8.58e-08	5.63e-08	ADCYAP1/APPL2/ARHGAP4/ARHGDIA/ARHGEF2/ASCL1/ASCL2/BAG5/BCL11A/BDNF/BMPR1A/BRINP1/CBFA2T2/CCL11/CDK5R1/CDK5RAP2/CDKL3/CIB1/CNTF/CNTN2/CTNNB1/CX3CL1/DAB1/DCC/DDX6/DICER1/DIO3/DKK1/DLL3/DNM3/DPYSL3/DRD3/EFNB2/EFNB3/EIF4ENIF1/EPHA4/EPHA7/ERBB4/F2/FEZF2/FGF13/FKBP4/FOXG1/FSTL4/GDF11/GFI1/GNRH1/GPR173/GPR37L1/GSK3A/HDAC2/HES1/HMG20A/ID1/ID2/IDH2/IFRD1/IL1B/IL6/INPP5J/ISL1/JAG1/KIAA0319/LBX1/LDLR/LIN28A…	142
GO:0061458	BP	GO:0061458	reproductive system development	200/5894	447/18866	9.49e-10	1.02e-07	6.73e-08	ADAM15/ADAM19/ADAM20/ADAM21/ADCYAP1/ADM/AFP/AMHR2/ARID1A/ARID4B/ARNT/ASB1/ASCL2/ASH1L/ATM/ATRX/BCL2/BCL2L1/BMP4/BMP5/BMP6/BMPR1B/BMPR2/CASP3/CASP8/CBL/CCDC134/CCND1/CDKN1B/CDX2/CEBPA/CHD7/CITED1/CRIP1/CRKL/CSF2/CTNNB1/CTSV/CUL7/CYP19A1/CYP7B1/DCN/DLG1/DMC1/DMRT1/DNAJB6/E2F8/EGLN1/EIF2B2/EPAS1/EPOR/ERCC1/ESR1/ETNK2/FEM1B/FGF8/FGF9/FGFR2/FKBP4/FLNA/FNDC3A/FOSL1/FOXA1/FOXC1/FOXF2/FRS2/FSHB/FSHR/FZD5…	200
GO:0014706	BP	GO:0014706	striated muscle tissue development	178/5894	389/18866	9.77e-10	1.04e-07	6.81e-08	ACTA1/ACTN2/ADAMTS9/ADRA1A/AGT/AGTR2/AKIRIN1/ALDH1A2/ALPK3/ANKRD1/ANKRD2/ARID1A/ARNTL/ATG5/BCL2/BCL9/BIN3/BMP10/BMP2/BMP4/BMP5/BMPR1A/CASQ1/CAV1/CAV3/CBY1/CCNT2/CDC42/CDON/CHD7/CHRNA1/CHRND/COL19A1/COPS2/CREB1/CSRP3/CTDP1/CTNNB1/CXADR/CYP26B1/DCN/DDX17/DKK1/DSP/EDN1/EEF2/EFNB2/EGLN1/ELN/EMD/ENG/EP300/EPHB1/ERBB4/EYA1/FBXO22/FGF20/FGF3/FGF8/FGF9/FGFR1/FGFR2/FHOD3/FOXC1/FOXC2/FOXH1/FOXN2/FRS2/FZD7/…	178
GO:0006367	BP	GO:0006367	transcription initiation from RNA polymerase II promoter	99/5894	189/18866	1.1e-09	1.15e-07	7.54e-08	ATF7IP/BRF2/CCNC/CCND1/CCNH/CDK8/CDK9/CDKN1A/CREB1/CREBBP/DR1/E2F2/ERCC1/ERCC2/ERCC6/ESR1/ESR2/ESRRA/ESRRB/GTF2A1/GTF2A2/GTF2E2/GTF2F2/GTF2H1/GTF2H3/GTF2H5/HEY2/HNF1A/HNF4G/MAML1/MECP2/MED12/MED13/MED14/MED15/MED23/MED24/MED25/MED27/MED4/MED6/MED8/NKX2-5/NOTCH1/NOTCH3/NOTCH4/NPPA/NR0B1/NR1H2/NR1H4/NR1I2/NR1I3/NR2C2/NR2E1/NR2E3/NR3C1/NR5A1/NR5A2/NRBF2/PGR/POLR2A/POLR2E/POLR2I/PPARA/PPARD/PPARG/PSM…	99
GO:0099504	BP	GO:0099504	synaptic vesicle cycle	103/5894	199/18866	1.22e-09	1.25e-07	8.23e-08	ACTB/ADCY1/ADRA1A/AMPH/AP3D1/APBA1/APBA2/ATP2A2/BACE1/BRSK2/BSN/CACNA1D/CADPS/CADPS2/CANX/CDH2/CDK5R1/CEL/CHRM2/CHRNA6/CHRNB2/CHRNB3/CPLX2/CPLX3/CSPG5/CTBP2/CTNNB1/DDC/DGKQ/DNAJC6/DNM1L/DNM2/DNM3/DOC2A/DOC2B/DRD1/DRD2/ERC2/GRIK5/HTR1B/HTR2A/MAGI2/NCS1/NLGN3/NLGN4X/NLGN4Y/OPHN1/OTOF/P2RX7/P2RY1/P2RY4/PCLO/PICALM/PLAA/PPFIA2/PPFIA3/PPP3CB/PREPL/PRKAR1B/PRKCG/PSEN1/PTEN/RAB3A/RAB3B/RAB3GAP1/RAPGEF4/…	103
GO:0050890	BP	GO:0050890	cognition	144/5894	302/18866	1.34e-09	1.36e-07	8.92e-08	AAAS/ABCA7/ACTR2/ADAM2/ADCY1/ADCY8/ADNP/ADORA1/AFF2/AGER/AGT/ARC/ASIC1/ATXN1/BBS4/BDNF/BRINP1/C1QL1/CAMK4/CASP3/CCK/CCL11/CHD7/CHL1/CHRNB2/CLN3/CNTN2/COMT/CREB1/CRH/CRHBP/CRTC1/CUX2/DBH/DDHD2/DGCR2/DKK1/DLG4/DRD1/DRD2/DRD3/DRD5/EP300/FGF13/FOSL1/FOXB1/FYN/FZD9/GABRA5/GALR2/GHSR/GIP/GLP1R/GM2A/GPR88/GRIA1/GRIN1/GRIN2A/GRIN2B/GRM5/GRPR/HLA-DRA/HOXA1/HRH2/HRH3/HTR2A/INS/INSR/JPH3/KALRN/KCNK10/KCNK2/…	144
GO:0018105	BP	GO:0018105	peptidyl-serine phosphorylation	147/5894	310/18866	1.46e-09	1.46e-07	9.56e-08	AKT2/AKT3/ANGPT1/ARAF/ATM/ATP2B4/AURKC/AVP/BAG4/BCAR3/BCL2/BDNF/BRSK2/CALCR/CAMK1G/CAMK2A/CAMK4/CAMKV/CAV1/CD44/CDK5R1/CHUK/CLK1/CLSPN/CREBL2/CSF3/CSNK1A1/CSNK1D/CSNK1E/CSNK1G1/CSNK1G3/DCLK2/DGKQ/DKK1/DMTN/DRD1/DYRK1B/DYRK2/DYRK4/EIF2AK3/EPO/ERN1/GADD45A/GAS6/GCG/GSK3A/HAX1/HCLS1/HDAC6/HGF/HIPK3/IFNA1/IFNA10/IFNA14/IFNA16/IFNA17/IFNA2/IFNA4/IFNA5/IFNA7/IFNA8/IFNB1/IFNG/IFNW1/IKBKB/IL6/INPP5J/INPP…	147
GO:0007193	BP	GO:0007193	adenylate cyclase-inhibiting G protein-coupled receptor signaling pathway	54/5894	86/18866	1.59e-09	1.56e-07	1.03e-07	ADCY1/ADCY2/ADCY7/ADCY8/ADCY9/ADORA1/ADRA2A/AKAP5/CASR/CHRM2/CHRM3/CHRM4/CHRM5/CORT/DRD2/DRD3/DRD4/EDN1/FLNA/GNAI1/GNAI2/GNAL/GNAT1/GNAT3/GNAZ/GPR176/GPR37L1/GRIK3/GRM2/GRM3/GRM4/GRM6/GRM8/HRH3/HRH4/HTR1A/HTR1B/HTR1D/HTR1E/HTR1F/HTR4/HTR5A/INSL3/MARCO/MCHR1/MTNR1A/NPR3/NPY2R/OPRK1/OPRL1/OPRM1/P2RY1/PTGDR2/SSTR2	54
GO:0030072	BP	GO:0030072	peptide hormone secretion	126/5894	257/18866	1.67e-09	1.61e-07	1.06e-07	AACS/ABCC8/ACVR2B/ADCY8/ADCYAP1/ADRA2A/ADRA2C/AIMP1/ALOX5/ARL2/ARNTL/BAD/BAIAP3/BMP8A/BRSK2/CACNA1C/CACNA1D/CACNA1E/CARTPT/CASR/CCL5/CDK16/CHD7/CPLX3/CPT1A/CRH/CRHBP/CRHR1/CYB5R4/DOC2B/DRD2/EDN1/EPHA5/FFAR2/FGB/FKBP1B/G6PC2/GAL/GCG/GCK/GHRH/GHRHR/GHSR/GIP/GIPR/GJA1/GLP1R/GLUD1/GPLD1/GPR27/GPR68/HADH/HFE/HMGN3/HNF1A/HTR2C/IFNG/IL1B/IL6/INS/IRS2/ISL1/KALRN/KCNC2/KIF5B/KISS1/LEP/LRP1/LTBP4/MC4R/MPC2…	126
GO:0046887	BP	GO:0046887	positive regulation of hormone secretion	74/5894	131/18866	1.82e-09	1.73e-07	1.14e-07	AACS/ADCY8/ADCYAP1/AIMP1/BAD/BAIAP3/BMP6/C1QTNF1/C1QTNF3/CASR/CREB1/CRH/CYP19A1/DOC2B/DRD2/EDN1/FGB/FGFR1/GAL/GALR1/GCG/GCK/GHRH/GHRHR/GIP/GIPR/GJA1/GLUD1/GPLD1/GPR27/GPR68/HFE/INHA/INS/IRS2/ISL1/KIF5B/KISS1/LEP/LRP1/MPC2/MYB/NADK/NNAT/NPPA/NR1H4/P2RY1/PDX1/PLA2G3/PLA2G6/PPARD/PPP3CB/PRKCE/PSMD9/PTPN11/RAC1/RBP4/RETN/RPH3AL/SCT/SMAD4/STX4/SYBU/TAC1/TARDBP/TCF7L2/TFR2/TM7SF3/TMF1/TNFSF11/TRH/TRPM4…	74
GO:0003073	BP	GO:0003073	regulation of systemic arterial blood pressure	58/5894	95/18866	1.9e-09	1.79e-07	1.17e-07	ACE/ADM/ADORA1/ADRA1A/ADRA1B/ADRB1/ADRB2/ADRB3/AGT/AGTR2/ATP6AP2/AVP/AVPR1A/AVPR1B/AVPR2/BBS4/BMPR2/CALCA/CORIN/CPA3/CRH/CYP11B2/CYP4A11/CYP4F2/DRD2/DRD3/DRD5/EDN1/F2RL1/GAS6/GJA1/GJA5/GPR37L1/GSK3A/HSD11B2/KLK1/KLK2/KLK3/MECP2/NAV2/NCALD/NOS3/NOX1/NPPA/NPPB/NTSR1/OR51E2/OXTR/PDE4D/PDGFB/PLCB3/PRCP/PTPRO/REN/SERPINF2/SLC2A5/SLC4A5/TNNI3	58
GO:0010038	BP	GO:0010038	response to metal ion	168/5894	366/18866	2.16e-09	2e-07	1.31e-07	AANAT/ABCC2/ACO1/ACTA1/ADAM9/ADAMTS13/ADCY1/ADCY7/ADCY8/ALOX15/ALOX5AP/AMELX/ANXA7/AOC1/APBB1/APOBEC1/AQP2/ASCL1/ASS1/ATF1/ATF4/ATP7B/BACE1/BAD/BCL2/BMP6/CA2/CACNA1G/CACNG2/CAPN3/CARF/CASP3/CASP8/CASR/CAV1/CCND1/CDH1/CDKN1B/CEBPA/CHUK/CPNE6/CPNE7/CPS1/CREB1/CRHBP/CRIP1/CYBRD1/CYP11B1/CYP11B2/CYP1A2/CYP2R1/DLG4/DMTN/DNMT3A/DPEP1/DRD2/EDN1/EIF2AK3/ENDOG/ERCC1/FABP4/FECH/FGB/GIPR/GLRA1/GLRA2/GNRH1/G…	168
GO:0097696	BP	GO:0097696	receptor signaling pathway via STAT	92/5894	174/18866	2.26e-09	2.06e-07	1.35e-07	AGT/CAV1/CCL2/CCL5/CCR2/CDK5R1/CENPJ/CNOT7/CNTF/CRLF1/CRLF2/CRLF3/CSF1R/CSF2/CSH1/CTF1/CTR9/CYP1B1/DAB1/DOT1L/EGF/EPO/ERBB4/F2/FGFR3/FLT3/FYN/GADD45A/GH1/GH2/GHR/HCLS1/HDAC2/HES1/HGS/HPX/IFNA1/IFNA10/IFNA14/IFNA16/IFNA17/IFNA2/IFNA4/IFNA5/IFNA7/IFNA8/IFNAR1/IFNB1/IFNG/IFNW1/IL12B/IL13/IL15/IL21/IL23A/IL26/IL3/IL4/IL5/IL6/IL6R/IL7R/ISL1/JAK3/LEP/LIF/MGAT5/NOTCH1/OSM/PECAM1/PIBF1/PKD2/PPP2R1A/PRL/P…	92
GO:0021983	BP	GO:0021983	pituitary gland development	32/5894	42/18866	2.61e-09	2.35e-07	1.54e-07	ADCYAP1/ALDH1A2/BMP2/BMP4/BMPR1A/CDH1/CREB1/DRD2/ETS1/FGF8/GHRH/GHRHR/HES1/HESX1/ISL1/LHX3/MSX1/NKX2-1/NR0B1/PAX6/POU1F1/POU3F2/PROP1/RBPJ/SALL1/SIX3/SLC6A3/SOX2/SOX3/TBX19/WNT4/WNT5A	32
GO:0021700	BP	GO:0021700	developmental maturation	137/5894	287/18866	3.06e-09	2.72e-07	1.78e-07	ABHD2/ACTL6B/ALDH1A2/ANAPC2/ANKRD17/ANKRD27/AP1G1/AP3D1/ARCN1/ARHGEF15/ASCL1/B4GALT6/BAIAP3/BCAN/BCL11A/BCL2/BFSP1/BFSP2/BMP2/BRD1/BTK/C1QL1/C3/CAMK2B/CCL21/CCR6/CD63/CDH5/CDK5R1/CDK5R2/CDKN1A/CEBPA/CEND1/CLEC7A/CLN5/CNTN2/CTNNB1/CX3CL1/DAG1/DAZL/DCHS1/DEFB1/DISC1/DLD/DLG4/DMC1/ELSPBP1/EPAS1/EPB42/EPO/ERCC2/FEM1B/FEV/FGFR1/FGFR3/FOXA1/FZD5/GAL/GATA3/GDF11/GH1/GHRHR/GRIN1/HES1/HOXA5/HOXB13/ID2/IL1…	137
GO:0048015	BP	GO:0048015	phosphatidylinositol-mediated signaling	99/5894	192/18866	3.3e-09	2.82e-07	1.85e-07	AGT/ANGPT1/BECN1/BTN2A2/C1QBP/CA8/CBL/CCL5/CD160/CD28/CRYBA1/CSF1R/CSF3/DCN/EDN1/EPO/EPOR/ERBB4/F2/F2RL1/FBXL2/FGFR1/FGR/FLT1/FLT3/FSHR/FYN/GATA3/GH1/GPR143/HAX1/HCLS1/HGF/HTR2A/HTR2B/INS/INSR/IRS2/KCNH1/KDR/LEP/LIME1/LTK/MAPK1/NCF1/NCS1/NEDD4/NF1/NGF/NPR3/NTF3/NTRK1/OGT/OSM/PDGFB/PDGFD/PI4KA/PI4KB/PIK3C3/PIK3CB/PIK3CG/PIK3IP1/PIK3R2/PIK3R5/PIP4K2A/PIP4K2B/PIP4K2C/PIP5K1A/PLCB1/PLCB2/PLCB3/PLCE1/…	99
GO:0007269	BP	GO:0007269	neurotransmitter secretion	92/5894	175/18866	3.31e-09	2.82e-07	1.85e-07	ADCY1/ADRA1A/APBA1/APBA2/ASIC1/ATP2A2/BACE1/BAIAP3/CACNA1B/CACNA1D/CADPS/CADPS2/CAMK2A/CHAT/CHRM2/CHRNA3/CHRNA6/CHRNB2/CHRNB3/CHRNB4/CPLX2/CPLX3/CSPG5/CTBP2/DNM1L/DOC2A/DOC2B/DRD1/DRD2/ERC2/GAD1/GAD2/GRIK5/GRM4/HRH3/HTR1B/HTR2A/KCNC4/KCNMB4/LIN7A/LIN7C/MCTP1/NCS1/NF1/NRXN2/OTOF/P2RX7/P2RY1/P2RY4/PCLO/PPFIA2/PPFIA3/PPFIA4/PREPL/PRKCG/PSEN1/RAB3A/RAB3GAP1/RHOT1/RIMS3/RPH3A/SCRIB/SLC18A2/SLC18A3/SLC…	92
GO:0099643	BP	GO:0099643	signal release from synapse	92/5894	175/18866	3.31e-09	2.82e-07	1.85e-07	ADCY1/ADRA1A/APBA1/APBA2/ASIC1/ATP2A2/BACE1/BAIAP3/CACNA1B/CACNA1D/CADPS/CADPS2/CAMK2A/CHAT/CHRM2/CHRNA3/CHRNA6/CHRNB2/CHRNB3/CHRNB4/CPLX2/CPLX3/CSPG5/CTBP2/DNM1L/DOC2A/DOC2B/DRD1/DRD2/ERC2/GAD1/GAD2/GRIK5/GRM4/HRH3/HTR1B/HTR2A/KCNC4/KCNMB4/LIN7A/LIN7C/MCTP1/NCS1/NF1/NRXN2/OTOF/P2RX7/P2RY1/P2RY4/PCLO/PPFIA2/PPFIA3/PPFIA4/PREPL/PRKCG/PSEN1/RAB3A/RAB3GAP1/RHOT1/RIMS3/RPH3A/SCRIB/SLC18A2/SLC18A3/SLC…	92
GO:0007599	BP	GO:0007599	hemostasis	160/5894	348/18866	4.5e-09	3.78e-07	2.49e-07	A2M/ACTB/ADAMTS13/ADRA2A/ADRA2B/ADRA2C/ADTRP/AKAP1/AKAP10/ANXA7/APOH/AVPR2/C1GALT1C1/C1QBP/C1QTNF1/C4BPB/CAPZA1/CAPZA2/CAV1/CD177/CD36/CD40LG/CD9/CDC42/CLEC1B/CLIC1/COMP/CPB2/CYP4F2/DGKE/DGKG/DGKH/DGKQ/DMTN/DOCK1/DOCK6/EDN1/EHD1/EHD2/ENPP4/ENTPD1/ENTPD2/F11/F12/F13B/F2/F2RL1/F2RL2/F2RL3/F3/F5/F7/F8/F9/FGB/FLNA/FYN/GAS6/GATA1/GATA3/GATA4/GNA11/GNA13/GNAS/GP1BA/GP5/GP6/GP9/GPI/HBD/HBE1/HDAC2/HPS5/H…	160
GO:0031667	BP	GO:0031667	response to nutrient levels	207/5894	473/18866	4.64e-09	3.86e-07	2.53e-07	AACS/ACSL1/ADCYAP1/ADIPOQ/ADM/ADRB1/ADRB2/AGL/AHCY/ALB/ALDH1A2/ALPL/AMBRA1/AMELX/AOC1/APAF1/APPL2/ASCL1/ASS1/ATF4/ATG14/ATG5/ATG7/BBS4/BCAS3/BCL2/BECN1/BMP8A/BMPR2/BNIP1/BRSK2/CACNB3/CADPS2/CARTPT/CASR/CBL/CCK/CCND1/CD3E/CDKN1A/CDKN2B/CDKN2D/CLEC16A/COMT/COX4I1/CPS1/CSH1/CTSV/CYP26B1/DAD1/DEPDC5/DHODH/DNAJC15/DNM1L/DNMT3A/EEF2/EHMT2/EIF2AK3/EIF4EBP1/EPO/ERCC1/F7/FBXO22/FES/FKBP1B/FOXO1/FOXO4/GABA…	207
GO:0060537	BP	GO:0060537	muscle tissue development	183/5894	409/18866	4.87e-09	3.99e-07	2.62e-07	ACTA1/ACTN2/ADAMTS9/ADRA1A/AGT/AGTR2/AKIRIN1/ALDH1A2/ALPK3/ANKRD1/ANKRD2/ARID1A/ARNTL/ATG5/BCL2/BCL9/BIN3/BMP10/BMP2/BMP4/BMP5/BMPR1A/CASQ1/CAV1/CAV3/CBY1/CCNT2/CDC42/CDON/CHD7/CHRNA1/CHRND/COL19A1/COPS2/CREB1/CSRP3/CTDP1/CTNNB1/CXADR/CYP26B1/DCN/DDX17/DKK1/DLG1/DSP/EDN1/EEF2/EFNB2/EGLN1/ELN/EMD/ENG/EP300/EPHB1/ERBB4/EYA1/FBXO22/FGF20/FGF3/FGF8/FGF9/FGFR1/FGFR2/FHOD3/FOXC1/FOXC2/FOXH1/FOXN2/FRS2/…	183
GO:0007259	BP	GO:0007259	receptor signaling pathway via JAK-STAT	87/5894	164/18866	4.94e-09	4e-07	2.63e-07	AGT/CAV1/CCL2/CCL5/CCR2/CDK5R1/CENPJ/CNOT7/CNTF/CRLF1/CRLF3/CSF1R/CSF2/CSH1/CTF1/CTR9/CYP1B1/DAB1/DOT1L/EGF/EPO/ERBB4/F2/FGFR3/FLT3/FYN/GADD45A/GH1/GH2/GHR/HCLS1/HDAC2/HES1/HGS/HPX/IFNA1/IFNA10/IFNA14/IFNA16/IFNA17/IFNA2/IFNA4/IFNA5/IFNA7/IFNA8/IFNAR1/IFNB1/IFNG/IFNW1/IL12B/IL13/IL15/IL21/IL23A/IL26/IL3/IL4/IL5/IL6/IL6R/ISL1/JAK3/LEP/LIF/NOTCH1/OSM/PECAM1/PIBF1/PKD2/PPP2R1A/PRL/PRLR/PTK2B/PWP1/RE…	87
GO:0090276	BP	GO:0090276	regulation of peptide hormone secretion	107/5894	213/18866	5.14e-09	4.11e-07	2.7e-07	AACS/ABCC8/ADCY8/ADCYAP1/ADRA2A/ADRA2C/AIMP1/ALOX5/ARL2/ARNTL/BAD/BAIAP3/BMP8A/BRSK2/CACNA1C/CACNA1D/CACNA1E/CARTPT/CASR/CCL5/CDK16/CHD7/CPT1A/CRH/CRHBP/DOC2B/DRD2/EPHA5/FFAR2/FGB/FKBP1B/G6PC2/GCG/GCK/GHRH/GHRHR/GHSR/GIP/GIPR/GJA1/GLP1R/GLUD1/GPLD1/GPR27/GPR68/HADH/HFE/HMGN3/HTR2C/IFNG/IL1B/IL6/INS/IRS2/ISL1/KALRN/KCNC2/KIF5B/KISS1/LEP/LRP1/MPC2/MTNR1B/NADK/NNAT/NOS2/NPFF/NR1H4/PASK/PAX8/PDX1/PFK…	107
GO:0045785	BP	GO:0045785	positive regulation of cell adhesion	190/5894	428/18866	5.26e-09	4.16e-07	2.73e-07	ABL1/ADAM19/ADAM9/AGER/AIF1/ALOX15/ALOX5/ANGPT1/AP3D1/APBB1IP/ARHGEF7/ARL2/ATM/BAD/BAG4/BTN2A2/C1QBP/CASS4/CAV1/CCL2/CCL21/CCL25/CCL5/CCR2/CD160/CD1D/CD209/CD28/CD36/CD3E/CD40LG/CD44/CD46/CD47/CD6/CD70/CD74/CDC42/CHRD/CIB1/COL8A1/CRK/CRKL/CSF1/CSPG5/CX3CL1/CYLD/CYTH3/DAG1/DISC1/DMP1/DMTN/DNM2/DOCK1/DOCK5/DUSP26/DYSF/EBI3/ECM2/EDIL3/EFNB2/EFNB3/EMILIN1/EPB41L5/EPO/ETS1/FBLN2/FGB/FLNA/FLOT2/FOXA1/F…	190
GO:0007389	BP	GO:0007389	pattern specification process	200/5894	455/18866	5.53e-09	4.31e-07	2.83e-07	ACVR2B/AHI1/AIDA/ALDH1A2/ALG5/ALX1/ALX3/ALX4/APC/APC2/ARC/ASCL1/ATM/ATP6AP2/BARX1/BBS4/BBS7/BMP2/BMP4/BMP5/BMPR1A/BMPR1B/BMPR2/C3/C9orf116/CCDC40/CDON/CDX1/CDX2/CELSR1/CELSR2/CER1/CHRD/CITED1/CRKL/CTNNB1/CXXC4/CYP26B1/DCHS1/DKK1/DLL3/DNAAF1/DNAI1/DNAI2/DYNC2H1/DYNC2LI1/EDN1/EMX1/EMX2/ENG/EP300/EPB41L5/ERBB4/ETS2/EVX1/EYA1/FBXL15/FEZF2/FGF1/FGF8/FGFR1/FGFR2/FOXA1/FOXB1/FOXC1/FOXC2/FOXG1/FOXH1/FOXJ…	200
GO:0001659	BP	GO:0001659	temperature homeostasis	91/5894	174/18866	5.64e-09	4.35e-07	2.86e-07	ABHD6/ACADL/ACHE/ACSL1/ACVR2B/ADCYAP1/ADIPOQ/ADORA1/ADRB1/ADRB2/ADRB3/ALDH1A1/APC/APPL2/ARNTL/ATF4/CAV1/CCR2/CD36/DBH/DRD1/DRD2/EBF2/EHMT1/EPAS1/FABP4/FABP5/FH/FOXC2/FOXO1/GJA1/GNAS/GPR3/GPX1/HADH/HDAC3/HTR2A/ID1/IL13/IL15/IL18R1/IL1B/IL4/IL4R/IRF4/KDM3A/KDM6B/LAMA4/LEP/LNPEP/MAP2K6/MC3R/MFN2/NOTCH1/NOVA2/NPR3/NR1H2/NTSR1/OGT/OXT/OXTR/PCTP/PEMT/PHOX2B/PLCL1/PLCL2/PRDM16/PRLR/PTGER3/PTGS2/PTH2R/RB…	91
GO:0050817	BP	GO:0050817	coagulation	160/5894	349/18866	5.77e-09	4.4e-07	2.89e-07	A2M/ACTB/ADAMTS13/ADRA2A/ADRA2B/ADRA2C/ADTRP/AKAP1/AKAP10/APOH/C1GALT1C1/C1QBP/C1QTNF1/C4BPB/CAPZA1/CAPZA2/CAV1/CD177/CD36/CD40LG/CD9/CDC42/CLEC1B/CLIC1/COMP/CPB2/CYP4F2/DGKE/DGKG/DGKH/DGKQ/DMTN/DOCK1/DOCK6/EDN1/EHD1/EHD2/ENPP4/ENTPD1/ENTPD2/F11/F12/F13B/F2/F2RL1/F2RL2/F2RL3/F3/F5/F7/F8/F9/FGB/FLNA/FYN/GAS6/GATA1/GATA3/GATA4/GNA11/GNA13/GNAS/GP1BA/GP5/GP6/GP9/HBD/HBE1/HDAC2/HPS5/HPS6/HRG/IFNA1/IF…	160
GO:0044706	BP	GO:0044706	multi-multicellular organism process	112/5894	226/18866	6.12e-09	4.61e-07	3.03e-07	ABCC2/ACR/ACVR1B/ADCYAP1/ADM/ADRA2B/ADRA2C/AGRP/AGT/AMBP/ARHGDIB/ARID1A/ARNTL/ASH1L/AVPR1A/BCL2/BMPR2/C1QBP/CALCA/COMT/CORIN/CRH/CRHBP/CRHR1/CTSV/DHODH/DKKL1/EDDM3A/EDN1/EPN1/EPO/EPOR/ESR1/ETS1/FKBP4/FOSL1/FSHB/FUT7/GHSR/GIP/GJA1/GNRH1/HFE/HSD11B2/HYAL3/IGFBP2/IGFBP5/IL1B/ITGA2/KALRN/KLF1/KLK14/KPNA6/KRAS/LEP/LGALS9/LIF/LNPEP/MAGED2/MAPK1/MTOR/NPFF/NPPA/OVGP1/OXT/OXTR/PAM/PAPPA/PGR/PLA2G4C/PLA2G6…	112
GO:1990845	BP	GO:1990845	adaptive thermogenesis	83/5894	155/18866	6.21e-09	4.62e-07	3.04e-07	ABHD6/ACADL/ACHE/ACSL1/ACVR2B/ADCYAP1/ADIPOQ/ADRB1/ADRB2/ADRB3/ALDH1A1/APC/APPL2/ARNTL/ATF4/BMP8A/CAV1/CCR2/CD36/DBH/EBF2/EHMT1/EPAS1/FABP4/FABP5/FH/FOXC2/GJA1/GNAS/GPR3/HADH/HDAC3/ID1/IL13/IL15/IL18R1/IL4/IL4R/IRF4/KDM3A/KDM6B/LAMA4/LEP/LNPEP/MAP2K6/MC4R/MFN2/NOTCH1/NOVA2/NPR3/NR1H2/OGT/OXT/OXTR/PCTP/PEMT/PHOX2B/PLCL1/PLCL2/PRDM16/PRLR/PTH2R/RB1/RBPJ/SCT/SCTR/SIRT6/SLN/SORL1/STAT6/STK11/SYK/TFE3…	83
GO:0003014	BP	GO:0003014	renal system process	70/5894	125/18866	8.13e-09	5.98e-07	3.93e-07	ADCY1/ADCY2/ADCY7/ADCY8/ADCY9/ADIPOQ/ADM/ADORA1/ADRA1A/AGT/AGTR2/AKAP11/AQP2/AQP4/ATP6V1B1/AVP/AVPR1A/AVPR2/BCL2/BCR/BMP4/CHRNA3/CHRNB2/CHRNB4/CLN3/COMT/CORIN/CYP11B2/CYP4A11/CYP4F2/DRD2/DRD3/EDN1/F2RL1/GAS6/GJA1/GJA5/GNAI2/HNF1A/HSD11B2/HYAL2/INPP5K/KLHL3/LGMN/MAGED2/MCAM/MYO1E/NPPB/NPR3/OPRL1/OR51E2/OXT/PDGFB/PKN1/PRKACA/PRKACG/PRKAR1B/PTPRO/REN/SERPINF2/SLC15A2/SLC22A6/SLC4A1/SLC4A5/SNX5/TAC1/…	70
GO:0003229	BP	GO:0003229	ventricular cardiac muscle tissue development	38/5894	55/18866	8.7e-09	6.33e-07	4.16e-07	ADAMTS9/BMP10/BMPR1A/CHD7/DSP/ENG/FGFR2/FOXC1/FOXC2/FOXH1/HAND1/HEG1/HEY2/ID2/ISL1/LRP2/MYBPC3/MYH6/MYH7/MYL2/MYL3/NKX2-5/NOTCH1/PKP2/PROX1/PTCD2/RBPJ/RXRA/SMAD4/TBX3/TGFB2/TNNC1/TNNI1/TNNI3/TNNT2/UBE4B/ZFPM2/ZMPSTE24	38
GO:0007596	BP	GO:0007596	blood coagulation	157/5894	343/18866	9.13e-09	6.47e-07	4.25e-07	A2M/ACTB/ADAMTS13/ADRA2A/ADRA2B/ADRA2C/ADTRP/AKAP1/AKAP10/APOH/C1GALT1C1/C1QBP/C1QTNF1/C4BPB/CAPZA1/CAPZA2/CAV1/CD177/CD36/CD40LG/CD9/CDC42/CLEC1B/CLIC1/COMP/CPB2/CYP4F2/DGKE/DGKG/DGKH/DGKQ/DMTN/DOCK1/DOCK6/EDN1/EHD1/EHD2/ENPP4/ENTPD1/ENTPD2/F11/F12/F13B/F2/F2RL1/F2RL2/F2RL3/F3/F5/F7/F8/F9/FGB/FLNA/FYN/GAS6/GATA1/GATA3/GATA4/GNA11/GNA13/GNAS/GP1BA/GP5/GP6/GP9/HBD/HBE1/HDAC2/HPS5/HPS6/HRG/IFNA1/IF…	157
GO:0010721	BP	GO:0010721	negative regulation of cell development	157/5894	343/18866	9.13e-09	6.47e-07	4.25e-07	ACTN4/ADCYAP1/AP1AR/APPL2/ARHGAP4/ARHGDIA/ARHGEF2/ASCL1/ASCL2/BAG5/BCL11A/BCL2/BDNF/BMPR1A/BRINP1/CAV3/CBFA2T2/CCL11/CDK5R1/CDK5RAP2/CDKL3/CIB1/CNTF/CNTN2/CTDP1/CTNNB1/CX3CL1/DAB1/DCC/DDX6/DICER1/DIO3/DKK1/DLL3/DMTN/DNM3/DPYSL3/DRD3/EFNB2/EFNB3/EIF4ENIF1/EPHA4/EPHA7/ERBB4/F2/FEZF2/FGF13/FKBP4/FOXG1/FRZB/FSTL4/GDF11/GFI1/GNRH1/GPR173/GPR37L1/GSK3A/HDAC2/HES1/HMG20A/ID1/ID2/IDH2/IFRD1/IL1B/IL6/INPP…	157
GO:0030308	BP	GO:0030308	negative regulation of cell growth	97/5894	190/18866	9.19e-09	6.47e-07	4.25e-07	ACVR1B/ADAM15/AGT/AGTR2/APBB1/ARHGAP4/BCL11A/BCL2/BDKRB1/BMP10/BMPR2/CAV3/CCAR2/CCDC85B/CDK5R1/CDKL3/CDKN1A/CDKN1B/CDKN2A/CDKN2C/CDKN2D/CRLF3/CTDP1/DCBLD2/DCC/DDX3X/DNAJB2/EI24/EPHA7/ESR2/FGF13/FRZB/FSTL4/GDF2/GDF9/GJA1/GNG4/GSK3A/HRG/HYAL1/HYAL2/IFRD1/ING1/IP6K2/KIAA0319/MAG/MAP2/MEG3/MSX1/MT3/MYL2/NDRG3/NDUFS3/NPPA/NPPB/NTN1/OSGIN2/PPARA/PPARD/PPARG/PPP2R1A/PRDM11/PTPRJ/PTPRS/RB1/RBBP7/RGS4/RNF…	97
GO:0070252	BP	GO:0070252	actin-mediated cell contraction	69/5894	123/18866	9.4e-09	6.55e-07	4.3e-07	ACTA1/ACTN2/ADORA1/ATP1A1/ATP2A1/ATP2A2/BIN1/CACNA1C/CACNA1D/CACNA1G/CACNA2D1/CAV1/CAV3/CTNNA3/DLG1/DSP/EPB41L5/FGF12/FGF13/FLNA/GATA4/GJA1/GJA5/HCN4/JUP/KCNE1/KCNE4/KCNJ2/KCNJ3/KCNJ5/KCNJ8/KCNN2/MYBPC1/MYBPC2/MYBPC3/MYH2/MYH3/MYH6/MYH7/MYH8/MYL1/MYL2/MYL3/MYL4/NEDD4L/PDE4B/PDE4D/PKP2/RANGRF/SCN1A/SCN1B/SCN3B/SCN5A/SNTA1/TCAP/TNNC1/TNNC2/TNNI1/TNNI2/TNNI3/TNNT1/TNNT2/TNNT3/TPM3/TPM4/TRPM4/TTN/VIL…	69
GO:0050730	BP	GO:0050730	regulation of peptidyl-tyrosine phosphorylation	126/5894	263/18866	9.88e-09	6.81e-07	4.47e-07	ABL1/ACE/ADIPOQ/ADNP/ADORA1/ADRA1A/ADRA2A/AGT/ANGPT1/ANGPT4/ARHGEF2/BDNF/BMP6/BST1/CADM4/CASS4/CAV1/CBL/CBLC/CCK/CCL5/CD36/CD3E/CD44/CD74/CHMP6/CNOT7/CNTF/CNTN1/CRLF1/CSF1R/CSF2/CSF3/CSH1/CSPG4/CTF1/DGKQ/DLG4/DMTN/EGF/EHD4/ENPP2/EPHA4/EPHA7/EPO/ERBB4/ERCC6/FCGR1A/FGF8/FGFR3/FLT3/FYN/GAS6/GATA1/GH1/GH2/GHR/GPRC5A/GPRC5B/GRM5/HAX1/HCLS1/HDAC2/HES1/HGF/HPX/HRG/HTR2A/HYAL2/IFNA2/IFNG/IL12B/IL13/IL15/…	126
GO:0006941	BP	GO:0006941	striated muscle contraction	92/5894	178/18866	1e-08	6.84e-07	4.49e-07	ADORA1/ADRA1A/ADRA1B/ALDOA/ARHGEF11/ATP1A1/ATP2A1/ATP2A2/ATP8A2/BIN1/BMP10/CACNA1C/CACNA1D/CACNA1G/CACNA2D1/CASQ1/CAV1/CAV3/CHRNA1/CHRNB1/CHRND/CHUK/CLIC2/CSRP3/CTNNA3/DLG1/DSP/DTNA/EEF2/FGF12/FGF13/FKBP1B/FLNA/GATA4/GJA1/GJA5/GSTM2/HCN4/HDAC4/JUP/KCNE1/KCNE4/KCNJ2/KCNJ3/KCNJ5/KCNJ8/KCNN2/MAP2K6/MB/MTOR/MYBPC3/MYBPH/MYH3/MYH6/MYH7/MYH8/MYL1/MYL2/MYL3/MYL4/NEDD4L/NKX2-5/NOS1/NPPA/PDE4B/PDE4D/PIK3C…	92
GO:0002793	BP	GO:0002793	positive regulation of peptide secretion	98/5894	193/18866	1.11e-08	7.46e-07	4.9e-07	AACS/ACHE/ADAM9/ADCY8/ADCYAP1/ADORA1/AGTR2/AIMP1/ANKRD1/APBB1/BAD/BAIAP3/BMP6/C1QTNF3/CASR/CD33/CRH/CRTAM/DNM1L/DOC2B/DRD2/F2RL1/FGB/FGR/GAPDH/GCG/GCK/GHRH/GHRHR/GIP/GIPR/GJA1/GLMN/GLUD1/GOLPH3/GPI/GPLD1/GPR27/GPR68/HFE/HLA-E/HTR2B/IFNG/IL13/IL26/IL5/IL6/INS/IRS2/ISL1/KCNN4/KIF5B/KISS1/LRP1/MIF/MPC2/NADK/NNAT/NPY2R/NR1H2/NR1H4/OR51E2/P2RX7/PARD6A/PDX1/PLA2G6/PPARD/PPID/PPP3CB/PRKCE/PSMD9/PTGER4/R…	98
GO:0090596	BP	GO:0090596	sensory organ morphogenesis	128/5894	269/18866	1.27e-08	8.47e-07	5.56e-07	AGTPBP1/AHI1/ARID1A/ATF4/ATOH1/ATP6V1B1/ATP8A2/BBS4/BCAR3/BCL2/BCR/BDNF/BMP4/CDON/CELSR1/CHD7/CHRNA10/CHRNA9/CNTF/COL8A1/COL8A2/CRB1/CRYGB/CTNNB1/CYP26B1/DIO3/DLX6/DSCAM/EDN1/EFEMP1/EPHB1/EYA1/FASLG/FGF8/FGF9/FGFR1/FGFR2/FOXE3/FOXF2/FOXG1/FOXI1/FRS2/FRZB/FSCN2/FZD3/FZD5/GATA3/GBX2/GDF11/GNAT1/GNAT2/HDAC2/HESX1/HMGN1/HOXA1/HPN/IFT122/INSIG1/JAG1/LHX1/LRIG1/LRP6/MAN2A1/MAPK1/MFAP5/MFN2/MSX1/MYO15A/…	128
GO:0006814	BP	GO:0006814	sodium ion transport	117/5894	241/18866	1.28e-08	8.48e-07	5.57e-07	ABCB11/ACTN4/ADRB2/ASIC1/ASIC4/ATP12A/ATP1A1/ATP2B4/ATP6V1B1/BPIFA1/CACNA1G/CACNA1I/CAV3/CNTN1/COMMD3/COMMD9/DLG1/DNM2/DRD2/DRD3/DRD4/FGF12/FGF13/FXYD2/FXYD3/FXYD5/FXYD6/FXYD7/HCN4/HECW1/KCNK1/KIF5B/KLHL3/MAGED2/NDUFA9/NEDD4/NEDD4L/NKAIN1/NKX2-5/NOS1/NOS3/P2RX7/PKD2/PKD2L1/PKP2/PRKCE/RANGRF/SCN10A/SCN11A/SCN1A/SCN1B/SCN2A/SCN3A/SCN3B/SCN4A/SCN5A/SCN8A/SCNN1D/SCNN1G/SHROOM2/SLC10A1/SLC10A2/SLC12A1…	117
GO:0048167	BP	GO:0048167	regulation of synaptic plasticity	97/5894	191/18866	1.3e-08	8.49e-07	5.58e-07	ABHD6/ABL1/ADCY1/ADCY8/ADORA1/AGER/AGT/AKAP5/ANAPC2/ARC/ATF4/BDNF/CAMK2A/CAMK2B/CBLN1/CLN3/CNTN2/CPLX2/CREB1/CRH/CRHR2/CRTC1/CX3CL1/CYP46A1/DBN1/DLG4/DRD1/DRD2/DRD5/EPHA4/GIP/GRIA1/GRIK2/GRIN1/GRIN2A/GRIN2B/GRIN2C/GRIN2D/GRM5/HRAS/HRH2/INS/ITPKA/JPH3/KCNJ10/KRAS/LGMN/LRRTM2/MAPK1/MCTP1/MECP2/MPP2/NEURL1/NEUROD2/NF1/NLGN3/NPTN/NR2E1/NRGN/P2RX3/PICK1/PLK2/PPFIA3/PPP3CB/PRKCZ/PSEN1/PTEN/PTGS2/PTK2B/…	97
GO:0048017	BP	GO:0048017	inositol lipid-mediated signaling	99/5894	196/18866	1.32e-08	8.57e-07	5.63e-07	AGT/ANGPT1/BECN1/BTN2A2/C1QBP/CA8/CBL/CCL5/CD160/CD28/CRYBA1/CSF1R/CSF3/DCN/EDN1/EPO/EPOR/ERBB4/F2/F2RL1/FBXL2/FGFR1/FGR/FLT1/FLT3/FSHR/FYN/GATA3/GH1/GPR143/HAX1/HCLS1/HGF/HTR2A/HTR2B/INS/INSR/IRS2/KCNH1/KDR/LEP/LIME1/LTK/MAPK1/NCF1/NCS1/NEDD4/NF1/NGF/NPR3/NTF3/NTRK1/OGT/OSM/PDGFB/PDGFD/PI4KA/PI4KB/PIK3C3/PIK3CB/PIK3CG/PIK3IP1/PIK3R2/PIK3R5/PIP4K2A/PIP4K2B/PIP4K2C/PIP5K1A/PLCB1/PLCB2/PLCB3/PLCE1/…	99
GO:0071902	BP	GO:0071902	positive regulation of protein serine/threonine kinase activity	157/5894	345/18866	1.49e-08	9.54e-07	6.26e-07	ACSL1/ADAM9/ADIPOQ/ADORA1/ADRA2A/ADRA2B/ADRB2/AGER/AGT/ARHGEF5/ATP2B4/AVPI1/BIRC7/BMP2/BMP4/C5/CARTPT/CCND1/CCND2/CCND3/CCNK/CCNT1/CCNT2/CD40LG/CD74/CDK5R1/CDK5R2/CDKN1B/CIB1/CRK/CRKL/CSF1R/CSPG4/DAZAP2/DBF4B/DDX3X/DKK1/DRD4/DUSP7/EDN1/EGF/EPHA4/ERCC6/ERN1/ERN2/ERP29/FGD2/FGF1/FGF18/FGFR1/FLT1/FLT3/FRS2/FZD10/FZD5/GADD45A/GDF15/GH1/GHR/GNG3/GRM1/GRM4/HGF/HRAS/HTR2A/HTR2B/IFNG/IGFBP6/IL1B/INCENP/I…	157
GO:0035296	BP	GO:0035296	regulation of tube diameter	77/5894	143/18866	1.57e-08	9.88e-07	6.49e-07	ACE/ADCYAP1/ADM/ADORA1/ADRA1A/ADRA1B/ADRA2A/ADRA2B/ADRA2C/ADRB1/ADRB2/ADRB3/AGT/AGTR2/ATG5/AVP/AVPR1A/AVPR1B/AVPR2/BMPR2/CALCA/CASR/CAV1/CHRM3/COMP/CPS1/CRP/DBH/DOCK5/DRD1/DRD5/EDN1/F2RL1/FGB/FOXC1/FOXC2/GCH1/GJA1/GJA5/GPX1/GRIP2/HRH2/HTR1A/HTR1B/HTR1D/HTR2A/HTR2B/HTR7/INS/ITGA1/KCNMB2/KCNMB4/KEL/KNG1/LEP/MTNR1B/NOS1/NOS3/NPPA/NPPB/NPPC/OXTR/P2RY1/PLA2G6/PPARD/PRKG1/PTAFR/PTGS2/PTPRM/ROCK2/SCPEP1…	77
GO:0097746	BP	GO:0097746	regulation of blood vessel diameter	77/5894	143/18866	1.57e-08	9.88e-07	6.49e-07	ACE/ADCYAP1/ADM/ADORA1/ADRA1A/ADRA1B/ADRA2A/ADRA2B/ADRA2C/ADRB1/ADRB2/ADRB3/AGT/AGTR2/ATG5/AVP/AVPR1A/AVPR1B/AVPR2/BMPR2/CALCA/CASR/CAV1/CHRM3/COMP/CPS1/CRP/DBH/DOCK5/DRD1/DRD5/EDN1/F2RL1/FGB/FOXC1/FOXC2/GCH1/GJA1/GJA5/GPX1/GRIP2/HRH2/HTR1A/HTR1B/HTR1D/HTR2A/HTR2B/HTR7/INS/ITGA1/KCNMB2/KCNMB4/KEL/KNG1/LEP/MTNR1B/NOS1/NOS3/NPPA/NPPB/NPPC/OXTR/P2RY1/PLA2G6/PPARD/PRKG1/PTAFR/PTGS2/PTPRM/ROCK2/SCPEP1…	77
GO:0016049	BP	GO:0016049	cell growth	211/5894	490/18866	1.63e-08	1.02e-06	6.69e-07	ABL1/ACVR1B/ADAM15/ADNP/ADNP2/ADRA1A/AGT/AGTR2/ANAPC2/APBB1/ARHGAP4/ARHGEF11/ARIH2/AVP/AVPR1A/BAP1/BCL11A/BCL2/BDKRB1/BDNF/BIN3/BMP10/BMPR2/CAV3/CCAR2/CCDC85B/CDC42/CDC73/CDH4/CDK5R1/CDKL3/CDKL5/CDKN1A/CDKN1B/CDKN2A/CDKN2C/CDKN2D/CIB1/CISH/CLSTN3/CPNE6/CRKL/CRLF3/CTDP1/CTNNB1/DBN1/DCBLD2/DCC/DDX3X/DERL2/DISC1/DNAJB2/DNM2/DNPH1/DPYSL2/DSCAM/EDN1/EI24/EIF4G2/EMX1/EPB41L5/EPHA7/ESR2/F2/FGF13/FLRT1/F…	211
GO:0016358	BP	GO:0016358	dendrite development	119/5894	247/18866	1.68e-08	1.04e-06	6.82e-07	ACTL6B/ACTR2/ANAPC2/ANKRD27/ARC/ARHGAP33/BBS4/BCL11A/BDNF/BMP5/BTBD3/C21orf91/CAMK2A/CAMK2B/CAPRIN1/CD3E/CDC42/CDK5R1/CDKL3/CDKL5/CELSR2/CHRNA3/CHRNB2/CRK/CRKL/CRTC1/CTNNA2/CTNND2/CUL7/CUX2/DAB1/DBN1/DCC/DISC1/DLG4/DLG5/DNM1L/DNM3/DOCK10/DSCAM/EPHA4/EPHB1/EPHB3/FBXO31/FEZF2/FLRT1/FSTL4/FYN/GRIN1/GRIP1/GSK3A/HDAC2/HDAC6/HECW1/ID1/IQGAP1/IQSEC1/ITPKA/KALRN/KIAA0319/KIDINS220/KIF1A/LLPH/LRP4/LST1/MA…	119
GO:0019233	BP	GO:0019233	sensory perception of pain	61/5894	106/18866	1.83e-08	1.12e-06	7.35e-07	ADCYAP1/ADORA1/ADRA2C/ALOXE3/BACE1/BDKRB1/CACNB3/CALCA/CCK/CCL2/CCR2/CHRNB2/CNR2/COMT/EDN1/EPHB1/FABP5/FYN/GIP/GRIN1/GRIN2A/GRIN2D/GRM1/HOXB8/HOXD1/HTR2A/IAPP/IL12B/ITGA2/KCNA1/KCNA2/LXN/MAPK1/MECP2/MTOR/NDN/NPFF/NPY2R/NTRK1/NTSR1/OPRK1/OPRL1/OPRM1/OXT/P2RX3/P2RX7/P2RY1/PENK/PRDM12/PTAFR/PTGS2/SCN10A/SCN11A/SCN1A/SCN3B/SMR3A/SMR3B/TAC1/TRPA1/VIP/ZFHX2	61
GO:0030048	BP	GO:0030048	actin filament-based movement	81/5894	153/18866	1.86e-08	1.13e-06	7.4e-07	ACTA1/ACTN2/ACTN4/ADORA1/ATP1A1/ATP2A1/ATP2A2/BIN1/CACNA1C/CACNA1D/CACNA1G/CACNA2D1/CAV1/CAV3/CTNNA3/DLG1/DSP/EPB41L5/FGF12/FGF13/FLNA/FNBP1L/GATA4/GJA1/GJA5/HCN4/JUP/KCNE1/KCNE4/KCNJ2/KCNJ3/KCNJ5/KCNJ8/KCNN2/MYBPC1/MYBPC2/MYBPC3/MYH2/MYH3/MYH6/MYH7/MYH8/MYL1/MYL2/MYL3/MYL4/MYO15A/MYO1A/MYO1C/MYO1D/MYO1E/MYO1F/MYO7B/NEDD4L/PDE4B/PDE4D/PKP2/RANGRF/SCN1A/SCN1B/SCN3B/SCN5A/SNTA1/SYNE2/TCAP/TNNC1/TNN…	81
GO:0018209	BP	GO:0018209	peptidyl-serine modification	152/5894	333/18866	1.96e-08	1.17e-06	7.66e-07	AKT2/AKT3/ANGPT1/ARAF/ATM/ATP2B4/AURKC/AVP/BAG4/BCAR3/BCL2/BDNF/BRSK2/CALCR/CAMK1G/CAMK2A/CAMK4/CAMKV/CAV1/CD44/CDK5R1/CHUK/CLK1/CLSPN/CREBL2/CSF3/CSNK1A1/CSNK1D/CSNK1E/CSNK1G1/CSNK1G3/DCLK2/DCN/DGKQ/DKK1/DMTN/DRD1/DYRK1B/DYRK2/DYRK4/EIF2AK3/EPO/ERN1/GADD45A/GALNT3/GAS6/GCG/GSK3A/HAX1/HCLS1/HDAC6/HGF/HIPK3/IFNA1/IFNA10/IFNA14/IFNA16/IFNA17/IFNA2/IFNA4/IFNA5/IFNA7/IFNA8/IFNB1/IFNG/IFNW1/IKBKB/IL6/…	152
GO:0055010	BP	GO:0055010	ventricular cardiac muscle tissue morphogenesis	34/5894	48/18866	1.96e-08	1.17e-06	7.66e-07	BMP10/BMPR1A/CHD7/DSP/ENG/FGFR2/FOXC1/FOXC2/FOXH1/HAND1/HEG1/HEY2/ISL1/LRP2/MYBPC3/MYH6/MYH7/MYL2/MYL3/NKX2-5/NOTCH1/PKP2/PROX1/PTCD2/RBPJ/RXRA/SMAD4/TGFB2/TNNC1/TNNI1/TNNI3/TNNT2/UBE4B/ZFPM2	34
GO:1904951	BP	GO:1904951	positive regulation of establishment of protein localization	166/5894	370/18866	1.98e-08	1.17e-06	7.66e-07	AACS/ACHE/ADAM9/ADCY8/AGTR2/AKAP5/AKT2/ANKRD1/APBB1/ARHGEF5/ARIH2/ATG13/BAD/BAG3/BAIAP3/BAP1/BCAS3/BCL2/BMP6/C1QTNF3/C2CD5/CACNB3/CASP8/CASR/CD33/CDC42/CDH1/CDK5R1/CENPJ/CIB1/CLN3/CRH/CRTAM/DNM1L/DOC2B/DRD2/EDEM1/EMD/F2RL1/FGB/FGR/FLNA/FYN/FZD5/GAPDH/GAS6/GCG/GCK/GIP/GIPR/GJA1/GLMN/GLUD1/GOLPH3/GPI/GPLD1/GPR27/GPR68/GSK3A/HCLS1/HDAC3/HLA-E/HPCA/HRAS/HSPA1L/HTR2B/HUWE1/HYAL2/IFNG/IL13/IL1B/IL26/IL…	166
GO:0042110	BP	GO:0042110	T cell activation	208/5894	483/18866	2.05e-08	1.2e-06	7.86e-07	ABL1/AGER/AIF1/AIRE/AP3D1/APBB1IP/ATG5/BAD/BATF/BCL2/BMP4/BTN2A2/CAMK4/CASP3/CASP8/CAV1/CCL2/CCL21/CCL5/CCND3/CCR2/CCR6/CCR9/CD151/CD160/CD1D/CD2/CD209/CD28/CD3D/CD3E/CD3G/CD40LG/CD44/CD46/CD47/CD6/CD7/CD70/CD74/CDC42/CHD7/CLEC7A/CLPTM1/CR1/CRTAM/CTNNB1/CXADR/CYLD/CYP26B1/DLG1/DLG5/DOCK2/EBI3/EFNB2/EFNB3/EPO/F2RL1/FCGR2B/FGL1/FKBP1B/FLOT2/FOXJ1/FOXP3/FUT7/FYN/FZD5/FZD7/GATA3/GLMN/GNRH1/GPR183/GRA…	208
GO:1904892	BP	GO:1904892	regulation of receptor signaling pathway via STAT	80/5894	151/18866	2.18e-08	1.26e-06	8.27e-07	AGT/CAV1/CCL5/CDK5R1/CENPJ/CNOT7/CNTF/CRLF1/CRLF2/CRLF3/CSF1R/CSF2/CSH1/CTF1/CYP1B1/DAB1/DOT1L/EGF/EPO/ERBB4/F2/FGFR3/FLT3/FYN/GADD45A/GH1/GH2/GHR/HCLS1/HDAC2/HES1/HGS/HPX/IFNA1/IFNA10/IFNA14/IFNA16/IFNA17/IFNA2/IFNA4/IFNA5/IFNA7/IFNA8/IFNB1/IFNG/IFNW1/IL12B/IL13/IL15/IL21/IL23A/IL26/IL3/IL4/IL5/IL6/IL6R/IL7R/ISL1/JAK3/LEP/LIF/MGAT5/NOTCH1/OSM/PECAM1/PIBF1/PPP2R1A/PRL/PRLR/PTK2B/PTPRT/PWP1/RET/SO…	80
GO:0010769	BP	GO:0010769	regulation of cell morphogenesis involved in differentiation	143/5894	310/18866	2.26e-08	1.3e-06	8.51e-07	ABL1/ACTN4/ACTR2/ADNP/ANAPC2/ANKRD27/AP1AR/ARC/ARHGAP33/ARHGAP35/ARHGAP4/ARHGDIA/ARHGEF7/BDNF/BMPR2/BRSK2/C1QBP/CAMK2B/CAPRIN1/CASS4/CDC42/CDH2/CDH4/CDK5R1/CDKL3/CDKL5/CHRNA3/CHRNB2/CIB1/CNTN2/CRK/CRKL/CSPG5/CUL7/CUX2/DAB1/DBN1/DCC/DISC1/DMTN/DNM1L/DNM2/DNM3/DOCK1/DOCK5/DPYSL2/DSCAM/EFNB3/EPHA4/EPHA7/EPHB3/FBXO31/FEZF2/FGB/FGF13/FLNA/FSTL4/GRIN1/HECW1/ID1/IFRD1/IST1/ITPKA/KALRN/KEL/KIAA0319/KIF1A…	143
GO:0015844	BP	GO:0015844	monoamine transport	51/5894	84/18866	2.32e-08	1.32e-06	8.67e-07	ACTB/ADRA2A/ADRA2B/ADRA2C/AGT/AGTR2/CARTPT/CHRM5/CHRNA6/CHRNB2/CRH/DRD1/DRD2/DRD3/DRD4/FGF20/GDNF/GHSR/HRH3/HTR1A/HTR1B/HTR2A/ITGB3/KCNA2/MECP2/NOS1/NPY2R/OXT/OXTR/P2RY1/PICK1/RAB3A/RAB3B/SLC18A1/SLC18A2/SLC22A1/SLC22A2/SLC22A3/SLC6A2/SLC6A3/SNCA/SYK/SYT1/SYT11/SYT12/SYT13/SYT17/SYT2/SYT5/TOR1A/VIP	51
GO:0035150	BP	GO:0035150	regulation of tube size	77/5894	144/18866	2.35e-08	1.32e-06	8.69e-07	ACE/ADCYAP1/ADM/ADORA1/ADRA1A/ADRA1B/ADRA2A/ADRA2B/ADRA2C/ADRB1/ADRB2/ADRB3/AGT/AGTR2/ATG5/AVP/AVPR1A/AVPR1B/AVPR2/BMPR2/CALCA/CASR/CAV1/CHRM3/COMP/CPS1/CRP/DBH/DOCK5/DRD1/DRD5/EDN1/F2RL1/FGB/FOXC1/FOXC2/GCH1/GJA1/GJA5/GPX1/GRIP2/HRH2/HTR1A/HTR1B/HTR1D/HTR2A/HTR2B/HTR7/INS/ITGA1/KCNMB2/KCNMB4/KEL/KNG1/LEP/MTNR1B/NOS1/NOS3/NPPA/NPPB/NPPC/OXTR/P2RY1/PLA2G6/PPARD/PRKG1/PTAFR/PTGS2/PTPRM/ROCK2/SCPEP1…	77
GO:0043405	BP	GO:0043405	regulation of MAP kinase activity	155/5894	342/18866	2.56e-08	1.42e-06	9.34e-07	ADAM9/ADIPOQ/ADORA1/ADRA2A/ADRA2B/AGER/AGT/AIDA/ARHGEF5/AVPI1/BIRC7/BMP2/BMP4/C5/CARTPT/CAV1/CAV3/CBLC/CD40LG/CD74/CRK/CRKL/CSPG4/DKK1/DRD4/DUSP14/DUSP21/DUSP4/DUSP7/EDN1/EGF/EPHA4/ERCC6/ERN1/ERN2/ERP29/FGD2/FGF1/FGF18/FGFR1/FLT1/FLT3/FRS2/FZD10/FZD5/GADD45A/GDF15/GH1/GHR/GNG3/GPS1/GPS2/GRM1/GRM4/GSTP1/HGF/HGS/HIPK3/HRAS/HTR2A/HTR2B/HYAL2/IGFBP6/IL1B/INPP5K/INSR/IQGAP1/IRAK3/ITGA1/KIDINS220/KITLG…	155
GO:0007626	BP	GO:0007626	locomotory behavior	99/5894	198/18866	2.57e-08	1.42e-06	9.34e-07	ABCA2/ADAM22/ADCY8/ANKH/APBA1/APBA2/ARCN1/ASTN1/AVP/C1QL1/CACNA1B/CELSR1/CEND1/CHD7/CHL1/CHRNA3/CHRNB2/CHRNB4/CLN6/CNP/CNTN2/CRH/DAB1/DBH/DDHD2/DLG4/DRD1/DRD2/DRD3/DRD4/DSCAM/EFNB3/EPHA4/EPS8/ESPN/FEZF2/FGF12/GAD1/GBX1/GDNF/GHSR/GIP/GLRA1/GLRB/GPR52/GPR88/GRIN1/GRIN2D/GRM1/GRM5/GRM6/HOXB8/HTR2C/ID2/KALRN/KCNJ10/MC3R/MCOLN3/MECP2/MTOR/MYO15A/NAGLU/NAV2/NKX2-1/NPC1/NPY2R/NTAN1/NTSR1/OPRK1/OPRL1/OPR…	99
GO:0043406	BP	GO:0043406	positive regulation of MAP kinase activity	125/5894	264/18866	2.68e-08	1.47e-06	9.68e-07	ADAM9/ADORA1/ADRA2A/ADRA2B/AGER/AGT/ARHGEF5/AVPI1/BIRC7/BMP2/BMP4/C5/CARTPT/CD40LG/CD74/CRK/CRKL/CSPG4/DKK1/DRD4/DUSP7/EDN1/EGF/EPHA4/ERCC6/ERN1/ERN2/ERP29/FGD2/FGF1/FGF18/FGFR1/FLT1/FLT3/FRS2/FZD10/FZD5/GADD45A/GDF15/GH1/GHR/GNG3/GRM1/GRM4/HGF/HRAS/HTR2A/HTR2B/IGFBP6/IL1B/INSR/IQGAP1/ITGA1/KIDINS220/KITLG/KRAS/LAMTOR2/LPAR3/MADD/MAP2K5/MAP2K6/MAP2K7/MAP3K10/MAP3K12/MAP3K13/MAP3K14/MAP3K2/MAP3K5/…	125
GO:0046425	BP	GO:0046425	regulation of receptor signaling pathway via JAK-STAT	76/5894	142/18866	2.74e-08	1.49e-06	9.81e-07	AGT/CAV1/CCL5/CDK5R1/CENPJ/CNOT7/CNTF/CRLF1/CRLF3/CSF1R/CSF2/CSH1/CTF1/CYP1B1/DAB1/DOT1L/EGF/EPO/ERBB4/F2/FGFR3/FLT3/FYN/GADD45A/GH1/GH2/GHR/HCLS1/HDAC2/HES1/HGS/HPX/IFNA1/IFNA10/IFNA14/IFNA16/IFNA17/IFNA2/IFNA4/IFNA5/IFNA7/IFNA8/IFNB1/IFNG/IFNW1/IL12B/IL13/IL15/IL21/IL23A/IL26/IL3/IL4/IL5/IL6/IL6R/ISL1/JAK3/LEP/LIF/NOTCH1/OSM/PECAM1/PIBF1/PPP2R1A/PRL/PRLR/PTK2B/PWP1/RET/SOCS2/STAT3/TNF/TNFRSF1A/…	76
GO:0043434	BP	GO:0043434	response to peptide hormone	194/5894	447/18866	3.03e-08	1.63e-06	1.07e-06	AANAT/ABCC2/ACTN2/ADCY1/ADCY2/ADCY7/ADCY8/ADCY9/ADIPOQ/ADM/AGRP/AGT/AGTR2/AKT2/APC/APOBEC1/APPL2/APRT/ASS1/ATP6AP1/ATP6V0A1/ATP6V0A2/ATP6V0D1/ATP6V0E2/ATP6V1A/ATP6V1B1/ATP6V1B2/ATP6V1E1/ATP6V1G1/ATP6V1H/BCAR3/C2CD5/CA2/CAMK2A/CAV1/CCND3/CDC5L/CDKN1B/CHUK/CITED1/CPS1/CREB1/CRHBP/CRHR1/CRHR2/CRK/CSH1/CSRP3/CYP11B1/CYP11B2/DAG1/EDN1/EIF2B1/EIF2B2/EIF2B3/EIF4EBP1/EIF6/ESRRA/F7/FABP3/FOXC2/FOXO1/FOXO4…	194
GO:0035725	BP	GO:0035725	sodium ion transmembrane transport	89/5894	174/18866	3.29e-08	1.75e-06	1.15e-06	ABCB11/ACTN4/ASIC1/ASIC4/ATP12A/ATP1A1/ATP2B4/BPIFA1/CACNA1G/CACNA1I/CAV3/DLG1/DNM2/DRD3/DRD4/FGF12/FGF13/FXYD2/FXYD3/FXYD5/FXYD6/FXYD7/HCN4/HECW1/KCNK1/KIF5B/NEDD4/NEDD4L/NOS1/PKD2/PKD2L1/PRKCE/RANGRF/SCN10A/SCN11A/SCN1A/SCN1B/SCN2A/SCN3A/SCN3B/SCN4A/SCN5A/SCN8A/SCNN1D/SCNN1G/SHROOM2/SLC12A1/SLC12A2/SLC12A3/SLC17A1/SLC17A2/SLC17A3/SLC17A4/SLC17A7/SLC20A2/SLC24A1/SLC24A2/SLC28A3/SLC34A1/SLC34A2/S…	89
GO:0055008	BP	GO:0055008	cardiac muscle tissue morphogenesis	41/5894	63/18866	3.3e-08	1.75e-06	1.15e-06	ANKRD1/BMP10/BMP2/BMPR1A/CHD7/DSP/EGLN1/ENG/FGFR2/FOXC1/FOXC2/FOXH1/HAND1/HEG1/HEY2/ISL1/LRP2/MYBPC3/MYH6/MYH7/MYL2/MYL3/NKX2-5/NOTCH1/PKP2/PROX1/PTCD2/RBPJ/RXRA/SIRT6/SMAD4/TCAP/TGFB2/TNNC1/TNNI1/TNNI3/TNNT2/TTN/UBE4B/WNT5A/ZFPM2	41
GO:0021536	BP	GO:0021536	diencephalon development	46/5894	74/18866	4.02e-08	2.12e-06	1.39e-06	ADCYAP1/ALDH1A2/BMP2/BMP4/BMPR1A/CDH1/CHRNB2/CREB1/CRH/DRD2/ETS1/FGF8/FOXB1/GBX2/GHRH/GHRHR/HAP1/HES1/HESX1/ISL1/KCNC1/KCNC2/LHX3/LRP6/MSX1/NKX2-1/NR0B1/OLIG2/PAX6/POU1F1/POU3F2/PROP1/RAB3GAP1/RBPJ/SALL1/SEMA3A/SHH/SIX3/SLC6A3/SMO/SOX2/SOX3/TBX19/WNT1/WNT4/WNT5A	46
GO:0050708	BP	GO:0050708	regulation of protein secretion	158/5894	352/18866	4.15e-08	2.17e-06	1.42e-06	AACS/ABCC8/ACHE/ADAM9/ADCY8/ADRA2A/ADRA2C/ADTRP/AGTR2/ALOX5/ANKRD1/APBB1/ARL2/ARNTL/BAD/BAIAP3/BMP6/BMP8A/BRSK2/BTN2A2/C1QTNF3/CACNA1C/CACNA1D/CACNA1E/CARTPT/CASR/CCL5/CD200/CD33/CD40LG/CDK16/CPT1A/CRH/CRTAM/DNM1L/DOC2B/DRD2/DRD3/DRD4/EPHA5/ERP29/F2RL1/FCGR2B/FGB/FGR/FKBP1B/FOXP3/G6PC2/GAPDH/GCG/GCK/GHSR/GIP/GIPR/GJA1/GJA5/GLMN/GLP1R/GLUD1/GOLPH3/GPI/GPLD1/GPR27/GPR68/HADH/HDAC9/HLA-E/HMGN3/HTR2B…	158
GO:0051937	BP	GO:0051937	catecholamine transport	45/5894	72/18866	4.44e-08	2.3e-06	1.51e-06	ACTB/ADRA2A/ADRA2B/ADRA2C/AGT/AGTR2/CARTPT/CHRM5/CHRNA6/CHRNB2/CRH/DRD1/DRD2/DRD3/DRD4/FGF20/GDNF/GHSR/HRH3/HTR1B/HTR2A/KCNA2/MECP2/NPY2R/OXT/OXTR/P2RY1/RAB3A/RAB3B/SLC18A2/SLC22A1/SLC22A2/SLC22A3/SLC6A2/SLC6A3/SNCA/SYT1/SYT11/SYT12/SYT13/SYT17/SYT2/SYT5/TOR1A/VIP	45
GO:0015837	BP	GO:0015837	amine transport	57/5894	99/18866	5.19e-08	2.67e-06	1.75e-06	ADORA1/ADRA2A/ADRA2B/ADRA2C/AGT/AGTR2/AVP/AVPR1A/CARTPT/CCK/CHRNA3/CHRNA6/CHRNB2/CRH/DDC/DRD1/DRD2/DRD3/DRD4/FGF20/GDNF/GHSR/HRH3/HTR1B/HTR2A/KCNA2/LEP/NPY2R/NPY5R/NTSR1/OXT/OXTR/P2RX7/P2RY1/PSEN1/RAB3A/RAB3B/RAB3GAP1/RGS4/SLC12A2/SLC18A1/SLC18A2/SLC22A2/SLC38A3/SNCA/STXBP1/SYT1/SYT11/SYT12/SYT13/SYT17/SYT2/SYT5/TH/TOR1A/TRH/VIP	57
GO:0045666	BP	GO:0045666	positive regulation of neuron differentiation	168/5894	380/18866	5.62e-08	2.87e-06	1.88e-06	ACTR2/ADCYAP1/ADNP/ADRA2B/ADRA2C/AGT/ANAPC2/ANKRD1/ANKRD27/APBB1/ARHGAP35/ARHGDIA/ARHGEF2/ASCL1/ATF1/ATOH1/ATP8A2/BCL2/BDNF/BMP2/BMP4/BMP5/BMP6/BMPR2/BRINP1/BRINP2/BRINP3/C21orf91/CAMK2B/CAPRIN1/CBFA2T2/CDH4/CDKL3/CDKL5/CDON/CNTF/CNTN1/CPNE6/CRTC1/CSNK1D/CSNK1E/CUL7/CUX2/CX3CL1/DAB1/DBN1/DISC1/DKK1/DLG4/DLG5/DNM1L/DPYSL3/DSCAM/EP300/EPHA4/EPO/FBXO31/FES/FEZF2/FGF20/FGFR1/FKBP1B/FOXA1/FOXG1/FYN/GD…	168
GO:0106106	BP	GO:0106106	cold-induced thermogenesis	76/5894	144/18866	6e-08	3.01e-06	1.98e-06	ABHD6/ACADL/ACHE/ACSL1/ACVR2B/ADCYAP1/ADIPOQ/ADRB1/ADRB2/ADRB3/ALDH1A1/APC/APPL2/ARNTL/ATF4/CAV1/CCR2/CD36/DBH/EBF2/EHMT1/EPAS1/FABP4/FABP5/FH/FOXC2/GJA1/GNAS/GPR3/HADH/HDAC3/ID1/IL13/IL15/IL18R1/IL4/IL4R/IRF4/KDM3A/KDM6B/LAMA4/LEP/LNPEP/MAP2K6/MFN2/NOTCH1/NOVA2/NPR3/NR1H2/OGT/OXT/OXTR/PCTP/PEMT/PHOX2B/PLCL1/PLCL2/PRDM16/PRLR/PTH2R/RB1/RBPJ/SIRT6/SLN/STAT6/STK11/SYK/TFE3/THRA/TLE3/TRPM8/TSHR/UCP1…	76
GO:0120161	BP	GO:0120161	regulation of cold-induced thermogenesis	76/5894	144/18866	6e-08	3.01e-06	1.98e-06	ABHD6/ACADL/ACHE/ACSL1/ACVR2B/ADCYAP1/ADIPOQ/ADRB1/ADRB2/ADRB3/ALDH1A1/APC/APPL2/ARNTL/ATF4/CAV1/CCR2/CD36/DBH/EBF2/EHMT1/EPAS1/FABP4/FABP5/FH/FOXC2/GJA1/GNAS/GPR3/HADH/HDAC3/ID1/IL13/IL15/IL18R1/IL4/IL4R/IRF4/KDM3A/KDM6B/LAMA4/LEP/LNPEP/MAP2K6/MFN2/NOTCH1/NOVA2/NPR3/NR1H2/OGT/OXT/OXTR/PCTP/PEMT/PHOX2B/PLCL1/PLCL2/PRDM16/PRLR/PTH2R/RB1/RBPJ/SIRT6/SLN/STAT6/STK11/SYK/TFE3/THRA/TLE3/TRPM8/TSHR/UCP1…	76
GO:0002027	BP	GO:0002027	regulation of heart rate	59/5894	104/18866	6.32e-08	3.15e-06	2.07e-06	ADM/ADRA1A/ADRA1B/ADRB1/AGT/AGTR2/ATP2A2/AVPR1A/BIN1/CACNA1C/CACNA1D/CACNA1G/CACNA2D1/CAV1/CAV3/CTNNA3/DRD2/DSP/EDN1/EPAS1/FKBP1B/GCH1/GJA5/HCN4/HEY2/JUP/KCNE1/KCNE4/KCNH6/KCNJ2/KCNJ3/KCNJ5/MC3R/MDM2/MYH6/MYH7/NPFF/NPPA/OXT/PDE4D/PKP2/POPDC2/PRKACA/RANGRF/RGS4/RNLS/SCN10A/SCN1B/SCN3B/SCN5A/SEMA3A/SLC1A1/SLC8A1/SNTA1/SPTBN4/TAC1/TACR3/TRPM4/YWHAE	59
GO:0042176	BP	GO:0042176	regulation of protein catabolic process	174/5894	397/18866	6.83e-08	3.38e-06	2.22e-06	ABCA2/ADAM9/ADRA2A/AGAP2/APC/APC2/ARAF/ARIH1/ARIH2/ARNTL/ASB9/ATG4B/ATG7/ATXN3/BAG2/BAG5/BAG6/BARD1/BBS7/BRSK2/C4BPA/C4BPB/CAV1/CAV3/CBFA2T3/CCAR2/CCDC22/CDH1/CDKN1B/CEBPA/CHFR/CHMP6/CLEC16A/CSNK1A1/CSNK1D/CSNK1E/DDA1/DERL2/DET1/DISC1/DNAJB2/DYSF/EDEM1/EEF1A2/EGF/EGLN1/EPHA4/F13B/FAF1/FBXO22/FLNA/FOXF2/FOXO1/FYN/FZR1/GFAP/GGA1/GGA3/GJA1/GLMN/GPC3/GPLD1/GPX1/GRIN2A/GRIN2C/GSK3A/HECW1/HFE/HGS/HUWE1…	174
GO:0006813	BP	GO:0006813	potassium ion transport	115/5894	242/18866	7.45e-08	3.66e-06	2.4e-06	ABCB8/ABCC8/ABCC9/ACTN2/ADCYAP1/ADORA1/ADRA2A/ATF4/ATP12A/ATP1A1/BIN1/CACNA1D/CAV1/CAV3/CCDC51/CCT8L2/CD63/CDKN1B/DLG1/DNM2/DRD1/DRD2/DRD3/FLNA/FXYD2/FXYD3/GAL/GALR2/GCK/GJA5/HCN4/HPN/HTR2A/KCNA1/KCNA10/KCNA2/KCNA3/KCNA4/KCNAB3/KCNB2/KCNC1/KCNC2/KCNC3/KCNC4/KCND1/KCNE1/KCNE4/KCNF1/KCNG1/KCNH1/KCNH4/KCNH6/KCNIP1/KCNIP2/KCNJ1/KCNJ10/KCNJ13/KCNJ14/KCNJ15/KCNJ16/KCNJ2/KCNJ3/KCNJ4/KCNJ5/KCNJ6/KCNJ8/KC…	115
GO:0016570	BP	GO:0016570	histone modification	200/5894	468/18866	7.67e-08	3.73e-06	2.45e-06	ACTL6B/AKAP8L/APBB1/ARID4B/ASH1L/ASH2L/ATF2/ATG5/ATM/ATRX/ATXN3/AURKC/BAP1/BAZ2A/BRD1/BRD7/BRD8/BRPF1/CBX8/CDC73/CDK9/CDY1/CHD5/CREBBP/CTBP1/CTNNB1/CTR9/CXXC1/DDB2/DOT1L/DPF3/DR1/DRD1/EHMT1/EHMT2/EID1/EP300/EP400/EYA1/EYA4/FBL/FEZF2/FOXP3/GATA3/GCG/GFI1/GLYR1/HDAC11/HDAC2/HDAC3/HDAC4/HDAC6/HDAC7/HDAC9/HR/HSF4/HUWE1/IL1B/INCENP/ING2/ING3/ING4/IRF4/ISL1/JADE3/JARID2/JMJD6/KANSL3/KAT5/KAT6A/KAT7/KAT…	200
GO:1904894	BP	GO:1904894	positive regulation of receptor signaling pathway via STAT	54/5894	93/18866	7.82e-08	3.78e-06	2.48e-06	AGT/CCL5/CENPJ/CNTF/CRLF1/CRLF2/CRLF3/CSF1R/CSF2/CSH1/CTF1/CYP1B1/EPO/ERBB4/F2/FGFR3/FLT3/FYN/GH1/GH2/GHR/HCLS1/HDAC2/HES1/HPX/IFNA2/IFNG/IL12B/IL13/IL15/IL21/IL23A/IL26/IL3/IL4/IL5/IL6/IL6R/IL7R/ISL1/LEP/LIF/MGAT5/NOTCH1/OSM/PECAM1/PIBF1/PRL/PRLR/PTK2B/STAT3/TNF/TNFRSF1A/TNFSF18	54
GO:0048562	BP	GO:0048562	embryonic organ morphogenesis	138/5894	302/18866	8.01e-08	3.85e-06	2.53e-06	AHI1/ALX1/ALX3/ALX4/ARID1A/ATOH1/ATP6V1B1/ATP8A2/BBS4/BBS7/BCR/BMP4/CCDC40/CELSR1/CHD7/CHRNA10/CHRNA9/CTNNB1/DLG1/DLX6/DNAAF1/EDN1/EFEMP1/ENG/EYA1/FGF8/FGF9/FGFR1/FGFR2/FOXC2/FOXF2/FOXG1/FOXH1/FOXI1/FRS2/FRZB/FUZ/FZD3/FZD5/GATA3/GATA4/GBX2/GNAS/GRHL2/HAND1/HAND2/HES1/HESX1/HOXA1/HOXA5/HOXA6/HOXB1/HOXB2/HOXB3/HOXB5/HOXB6/HOXB8/HOXB9/HOXC4/HPN/HYAL1/ID2/IFT122/IFT140/IFT57/INSIG1/LBX1/LHX1/LRIG1/LR…	138
GO:0051966	BP	GO:0051966	regulation of synaptic transmission	glutamatergic	45/5894	73/18866	8.08e-08	3.85e-06	2.53e-06	ADCYAP1/ADORA1/CACNG2/CACNG3/CACNG4/CACNG5/CCL2/CCR2/CDH2/CLN3/DISC1/DKK1/DRD1/DRD2/DRD3/GRIK1/GRIK2/GRIK3/GRM1/GRM2/GRM3/GRM4/GRM5/GRM6/GRM8/HTR1B/HTR2A/MAPK8IP2/NLGN3/NPY2R/NTRK1/OPHN1/OXTR/PLA2G6/PSEN1/PTGS2/PTK2B/RAB3GAP1/ROR2/SHANK1/STXBP1/SYT1/TNF/TNR/UNC13A	45
GO:0003002	BP	GO:0003002	regionalization	158/5894	355/18866	8.18e-08	3.87e-06	2.54e-06	ACVR2B/AHI1/AIDA/ALDH1A2/ALX1/ALX4/ARC/ASCL1/ATM/ATP6AP2/BARX1/BMP2/BMP4/BMPR1A/BMPR1B/BMPR2/C3/CDON/CDX1/CDX2/CELSR1/CELSR2/CER1/CHRD/CRKL/CTNNB1/CXXC4/CYP26B1/DKK1/DLL3/DNAAF1/DYNC2H1/EDN1/EMX1/EMX2/EP300/EPB41L5/ETS2/EVX1/FBXL15/FEZF2/FGF1/FGF8/FGFR1/FGFR2/FOXA1/FOXB1/FOXC1/FOXC2/FOXG1/FOXH1/FOXJ1/FRS2/FUZ/FZD5/GATA4/GBX2/GDF11/GDF3/GDNF/GPC3/GPR161/GRSF1/HES1/HES2/HEY2/HEYL/HHEX/HOXA5/HOXA6/H…	158
GO:0048511	BP	GO:0048511	rhythmic process	139/5894	305/18866	8.77e-08	4.12e-06	2.71e-06	AANAT/ADCY1/ADIPOQ/ADNP/ADORA1/ADRB1/AFP/AGRP/AHCY/ARNTL/ASS1/ATF4/ATG7/BDNF/BMPR1B/CARTPT/CASP3/CCAR2/CDK5R1/CHRNB2/CPT1A/CREB1/CREBBP/CREM/CRH/CRTC1/CSF2/CSNK1D/CSNK1E/CUL4A/DBP/DDC/DNM1L/DRD2/DRD3/DRD4/ENOX1/EP300/ESR1/ETS1/F7/FBXL8/FSHB/FSHR/GABRB1/GDF9/GFPT1/GHRH/GHRHR/GNA11/GNRH1/GPR176/HAS1/HCRTR2/HDAC2/HDAC3/HNRNPD/HS3ST2/HTR7/HUWE1/ID1/ID2/KCNA2/KDM2A/KDM5A/KDM5B/KDM5C/KDM8/KISS1/KMT2A/L…	139
GO:0001558	BP	GO:0001558	regulation of cell growth	182/5894	420/18866	9.16e-08	4.27e-06	2.8e-06	ABL1/ACVR1B/ADAM15/ADNP/ADNP2/AGT/AGTR2/ANAPC2/APBB1/ARHGAP4/ARHGEF11/AVP/AVPR1A/BAP1/BCL11A/BCL2/BDKRB1/BDNF/BMP10/BMPR2/CAV3/CCAR2/CCDC85B/CDC42/CDC73/CDH4/CDK5R1/CDKL3/CDKL5/CDKN1A/CDKN1B/CDKN2A/CDKN2C/CDKN2D/CIB1/CISH/CLSTN3/CPNE6/CRKL/CRLF3/CTDP1/DBN1/DCBLD2/DCC/DDX3X/DERL2/DISC1/DNAJB2/DNM2/DNPH1/DPYSL2/DSCAM/EDN1/EI24/EIF4G2/EPHA7/ESR2/F2/FGF13/FRZB/FSTL4/GDF2/GDF9/GJA1/GNG4/GSK3A/HPN/HRG/…	182
GO:0045665	BP	GO:0045665	negative regulation of neuron differentiation	108/5894	225/18866	9.64e-08	4.46e-06	2.93e-06	ARHGAP4/ARHGDIA/ASCL1/BAG5/BCL11A/CBFA2T2/CDK5R1/CDK5RAP2/CDKL3/CIB1/CNTF/CNTN2/DAB1/DCC/DDX6/DIO3/DKK1/DNM3/DPYSL3/EFNB2/EFNB3/EIF4ENIF1/EPHA4/EPHA7/FEZF2/FGF13/FKBP4/FOXG1/FSTL4/GDF11/GFI1/GPR37L1/GSK3A/HDAC2/HES1/HMG20A/ID1/ID2/IFRD1/INPP5J/ISL1/JAG1/KIAA0319/LBX1/LRIG2/LRP1/LRP4/LSM1/MAG/MAP2/MCF2/MDM2/MT3/MYLIP/NGFR/NKX2-2/NLGN3/NOTCH1/NOTCH3/NR2E1/NTN1/OLIG2/PAFAH1B1/PAQR3/PAX6/PHOX2B/PLK2/…	108
GO:0051932	BP	GO:0051932	synaptic transmission	GABAergic	33/5894	48/18866	1.01e-07	4.62e-06	3.04e-06	ADORA1/ADRA1A/BAIAP3/BDNF/CA2/CA7/CLN3/CLSTN3/CNR2/DRD2/GABRA1/GABRA2/GABRA3/GABRA4/GABRA5/GABRB2/GABRG2/GABRG3/HAP1/HTR1B/KIF5B/KRAS/NF1/NPY5R/OXTR/PLCL1/PLCL2/PRKCE/PTEN/RAC3/STXBP1/SYN3/TAC1	33
GO:0006816	BP	GO:0006816	calcium ion transport	184/5894	426/18866	1.03e-07	4.7e-06	3.09e-06	ABL1/ADCYAP1R1/ADRA1A/ADRA2A/AFG3L2/AGT/ANXA6/APLNR/ASIC1/ATG5/ATP2A1/ATP2A2/ATP2B2/ATP2B3/ATP2B4/ATP2C2/BCL2/BDKRB1/BEST1/BIN1/CACNA1B/CACNA1C/CACNA1D/CACNA1E/CACNA1F/CACNA1G/CACNA1I/CACNA1S/CACNA2D1/CACNA2D3/CACNB1/CACNB3/CACNG1/CACNG2/CACNG3/CACNG4/CACNG5/CALCR/CALCRL/CAMK2A/CAMK2B/CAPN3/CASQ1/CASR/CAV1/CAV3/CCL2/CCL21/CCL5/CD33/CHD7/CHRNA10/CHRNA9/CHRNB2/CLCA1/CLIC2/CRH/CRHR1/CSN2/CTNNB1/CUL5…	184
GO:0008277	BP	GO:0008277	regulation of G protein-coupled receptor signaling pathway	77/5894	148/18866	1.09e-07	4.9e-06	3.22e-06	ABHD6/ADCYAP1/ADM/ADRB2/AIPL1/APLNR/APLP1/ARR3/ATP2B4/C3/CALCR/CAMK2A/CAMKMT/CCL5/CNGB1/CNTN2/DGKQ/DNM2/DRD2/DRD3/EDN1/F2/FGF8/FNTA/FRMPD1/GIPR/GIT2/GNAI2/GNAT1/GNG4/GPR27/GRK1/GRK4/GRK5/GRK6/GSK3A/GUCA1B/GUCY2F/HTR1B/HTR2B/KLK14/KLK5/METAP1/MGRN1/NECAB2/NMT2/NOS1/OPRL1/OPRM1/PDCL/PDE6B/PDE6G/PDE6H/PLCB1/PLCE1/PPEF1/PRKCA/PTGDR2/RAMP1/RAMP3/RGS20/RGS4/RGS6/RGS9/RHO/ROCK2/RPH3AL/SAG/SNCA/SSTR4/SYP…	77
GO:0003018	BP	GO:0003018	vascular process in circulatory system	94/5894	190/18866	1.09e-07	4.9e-06	3.22e-06	ABCC2/ABCG2/ACE/ADCYAP1/ADM/ADORA1/ADRA1A/ADRA1B/ADRA2A/ADRA2B/ADRA2C/ADRB1/ADRB2/ADRB3/AGT/AGTR2/ANGPT1/ARHGAP35/ATG5/AVP/AVPR1A/AVPR1B/AVPR2/BCR/BMP6/BMPR2/CALCA/CASR/CAV1/CD36/CDH5/CHRM3/COMP/CPS1/CRP/DBH/DOCK5/DRD1/DRD5/EDN1/F2RL1/FABP5/FGB/FOXC1/FOXC2/GCH1/GJA1/GJA5/GPX1/GRIP2/HRH2/HTR1A/HTR1B/HTR1D/HTR2A/HTR2B/HTR7/INS/ITGA1/KCNMB2/KCNMB4/KEL/KNG1/LEP/MTNR1B/MYLK3/NOS1/NOS3/NPPA/NPPB/NPPC/O…	94
GO:0035249	BP	GO:0035249	synaptic transmission	glutamatergic	55/5894	96/18866	1.11e-07	4.98e-06	3.27e-06	ADCYAP1/ADORA1/CACNG2/CACNG3/CACNG4/CACNG5/CCL2/CCR2/CDH2/CDH8/CLN3/CLSTN3/CNIH3/DISC1/DKK1/DRD1/DRD2/DRD3/GRIA2/GRIK1/GRIK2/GRIK3/GRIK4/GRIK5/GRIN1/GRM1/GRM2/GRM3/GRM4/GRM5/GRM6/GRM8/HTR1B/HTR2A/MAPK8IP2/NF1/NLGN3/NPY2R/NTRK1/OPHN1/OXTR/PLA2G6/PSEN1/PTGS2/PTK2B/RAB3GAP1/ROR2/SHANK1/SLC17A6/SLC17A7/STXBP1/SYT1/TNF/TNR/UNC13A	55
GO:0016569	BP	GO:0016569	covalent chromatin modification	204/5894	481/18866	1.13e-07	5.03e-06	3.3e-06	ACTL6B/AKAP8L/APBB1/APOBEC1/ARID4B/ASH1L/ASH2L/ATF2/ATF7IP/ATG5/ATM/ATRX/ATXN3/AURKC/BAP1/BAZ2A/BRD1/BRD7/BRD8/BRPF1/CBX8/CDC73/CDK9/CDY1/CHD1/CHD5/CREBBP/CTBP1/CTNNB1/CTR9/CXXC1/DDB2/DNMT3A/DOT1L/DPF3/DR1/DRD1/EHMT1/EHMT2/EID1/EP300/EP400/EYA1/EYA4/FBL/FEZF2/FOXP3/GATA3/GCG/GFI1/GLYR1/HDAC11/HDAC2/HDAC3/HDAC4/HDAC6/HDAC7/HDAC9/HR/HSF4/HUWE1/IL1B/INCENP/ING2/ING3/ING4/IRF4/ISL1/JADE3/JARID2/JMJD6…	204
GO:0006352	BP	GO:0006352	DNA-templated transcription	initiation	117/5894	249/18866	1.24e-07	5.45e-06	3.58e-06	ATF7IP/BAZ2A/BCLAF1/BRF1/BRF2/CCNC/CCND1/CCNH/CDK8/CDK9/CDKN1A/CREB1/CREBBP/CTNNB1/DR1/E2F2/ERCC1/ERCC2/ERCC6/ESR1/ESR2/ESRRA/ESRRB/FOSL1/GTF2A1/GTF2A2/GTF2E2/GTF2F2/GTF2H1/GTF2H3/GTF2H5/GTF3C5/HEY2/HNF1A/HNF4G/MAML1/MECP2/MED12/MED13/MED14/MED15/MED23/MED24/MED25/MED27/MED4/MED6/MED8/MORC1/NKX2-5/NOTCH1/NOTCH3/NOTCH4/NPPA/NR0B1/NR1H2/NR1H4/NR1I2/NR1I3/NR2C2/NR2E1/NR2E3/NR3C1/NR5A1/NR5A2/NRBF2/PG…	117
GO:0042063	BP	GO:0042063	gliogenesis	139/5894	307/18866	1.42e-07	6.2e-06	4.07e-06	ABCA2/ABL1/ADAM22/ADCYAP1/AGER/AKT2/ARHGEF10/ASCL1/ASCL2/B4GALT6/BIN1/BMP2/CCL2/CCR2/CD9/CDH2/CDK5R1/CDK5R2/CDKN2C/CNP/CNTF/CNTN2/CNTNAP1/CRB1/CREB1/CRKL/CSF1/CSF1R/CSPG4/CSPG5/CTNNB1/CX3CL1/DAB1/DAG1/DICER1/DISC1/DRD1/DRD3/EEF2/EIF2B1/EIF2B2/EIF2B3/EMX1/EPHA4/ERCC2/F2/FGF5/FOXG1/GAP43/GCM1/GCM2/GPC1/GPR17/GPR183/GPR37L1/GSTP1/HDAC11/HDAC2/HES1/ID2/IDH2/IFNG/IL1B/IL6/KCNJ10/KLF15/KRAS/LAMC3/LDLR/…	139
GO:0007565	BP	GO:0007565	female pregnancy	96/5894	196/18866	1.47e-07	6.41e-06	4.21e-06	ABCC2/ACVR1B/ADCYAP1/ADM/ADRA2B/ADRA2C/AGRP/AGT/AMBP/ARHGDIB/ARID1A/ASH1L/BCL2/BMPR2/C1QBP/CALCA/COMT/CORIN/CRH/CRHBP/CRHR1/CTSV/DHODH/EPN1/EPO/EPOR/ESR1/ETS1/FKBP4/FOSL1/FSHB/FUT7/GHSR/GIP/GJA1/GNRH1/HFE/HSD11B2/IGFBP2/IGFBP5/IL1B/ITGA2/KLF1/KPNA6/KRAS/LEP/LGALS9/LIF/LNPEP/MAGED2/MAPK1/MTOR/NPFF/NPPA/OVGP1/OXT/OXTR/PAM/PAPPA/PGR/PLA2G6/POLR1B/PPARD/PRDM14/PRL/PRLR/PSG1/PSG11/PSG2/PSG3/PSG4/PSG5/…	96
GO:0019226	BP	GO:0019226	transmission of nerve impulse	44/5894	72/18866	1.61e-07	6.97e-06	4.58e-06	AGT/AVP/AVPR1A/CACNA1G/CACNA1I/CACNG2/CACNG3/CACNG4/CACNG5/CARTPT/CHRM5/CHRNA1/CHRNB4/CLCN1/CNTNAP1/DRD1/DRD5/FGF12/FKBP1B/GHSR/GLRA1/GPR88/GRIK2/ITGA2/KCNA1/KCNA2/KCNMB2/KCNMB4/MAG/MTNR1B/P2RX3/PAFAH1B1/SCN10A/SCN11A/SCN1A/SCN1B/SCN2A/SCN3A/SCN4A/SCN5A/SCN8A/SOD1/SPTBN4/TNR	44
GO:0003007	BP	GO:0003007	heart morphogenesis	120/5894	258/18866	1.71e-07	7.29e-06	4.79e-06	ADAM15/AHI1/ALDH1A2/ANKRD1/ATF2/BBS4/BBS7/BMP10/BMP2/BMP4/BMP5/BMPR1A/BMPR2/CAV3/CCDC40/CHD7/CRKL/CTNNB1/DCHS1/DKK1/DNAAF1/DSP/EGLN1/ELN/ENG/EYA1/FGF8/FGFR2/FOXC1/FOXC2/FOXH1/GATA3/GATA4/GJA5/GRHL2/GSK3A/HAND1/HAND2/HEG1/HES1/HEY2/HEYL/HTR2B/ID2/IFT57/INSR/ISL1/JAG1/LBX1/LEFTY1/LRP2/MDM2/MDM4/MEGF8/MICAL2/MSX1/MTOR/MYBPC3/MYH6/MYH7/MYL2/MYL3/NDRG4/NEDD4/NIPBL/NKX2-5/NOS3/NOTCH1/NPY2R/NPY5R/OLFM1/…	120
GO:1901617	BP	GO:1901617	organic hydroxy compound biosynthetic process	120/5894	258/18866	1.71e-07	7.29e-06	4.79e-06	ABCA2/ABCB11/ACAT2/ACOT8/ADCYAP1R1/AGTR2/AKR1C4/AKR1D1/ALOX15/APOA4/ASIP/AVPR1B/BAAT/BMP2/BMP5/BMP6/CITED1/CYB5R1/CYB5R2/CYB5R3/CYP11B1/CYP11B2/CYP19A1/CYP27A1/CYP2R1/CYP39A1/CYP46A1/CYP7A1/CYP7B1/DAO/DBH/DCT/DDC/DGKQ/DKKL1/EBP/ERLIN2/FASN/FDFT1/FGF1/FGFR4/GATA3/GCH1/GFI1/GGPS1/H6PD/HAND2/HDC/HMGCS1/HSD17B3/HSD17B7/IDI1/IFNG/IL1B/IMPA1/INSIG1/INSM1/IP6K2/IPPK/ITPKA/ITPKB/LDHC/LEP/LHCGR/LPCAT3/MBT…	120
GO:0030879	BP	GO:0030879	mammary gland development	74/5894	142/18866	1.75e-07	7.31e-06	4.8e-06	AKT2/APRT/ARHGAP35/ATP2C2/ATP7B/BMP4/CAV1/CAV3/CCL11/CCND1/CREB1/CSF1/CSF1R/CSN2/CSN3/CYP19A1/DHODH/EGF/ELF5/ERBB4/ESR1/FASN/FGFR2/FOXB1/GATA3/GHRHR/GPX1/HOXA5/HOXB9/ID2/IGFBP5/IRS2/ITGA2/KALRN/KDM5B/LATS1/LRP6/MAPK1/MST1/MSX1/NCOR2/NEURL1/NOTCH4/NTN1/OXTR/PAM/PGR/PRL/PRLR/PTCH1/ROBO1/RTN4/SCRIB/SERPINC1/SLC29A1/SLC6A3/SMO/SOCS2/SOSTDC1/SOX9/SRC/STAT5A/STAT5B/STAT6/TBX2/TBX3/TNFSF11/TPH1/USF2/VDR…	74
GO:0072073	BP	GO:0072073	kidney epithelium development	74/5894	142/18866	1.75e-07	7.31e-06	4.8e-06	ADIPOQ/AGT/AGTR2/AHI1/BCL2/BDNF/BMP2/BMP4/CER1/CITED1/CRLF1/CTNNB1/DCHS1/DLG1/EFNB2/EPHA4/EPHA7/EYA1/FGF1/FGF8/FGFR1/FGFR2/FOXC1/FOXC2/FOXJ1/GATA3/GDF11/GDNF/GPC3/GREB1L/HES1/HEYL/IQGAP1/JAG1/KLF15/KLHL3/LHX1/LIF/MAGI2/MTSS1/MYO1E/NOTCH1/NPHS1/NPHS2/PAX2/PAX8/PECAM1/PKD2/POU3F3/PTCH1/PTPRO/RARA/RET/SALL1/SDC1/SDC4/SHH/SIM1/SIX2/SMAD2/SMAD3/SMAD4/SMAD5/SMAD6/SMO/SOX9/UMOD/WNT1/WNT11/WNT2B/WNT4/WNT…	74
GO:0003205	BP	GO:0003205	cardiac chamber development	87/5894	174/18866	1.76e-07	7.31e-06	4.8e-06	ADAMTS6/ARID1A/BMP10/BMP4/BMP5/BMPR1A/BMPR2/CAV3/CHD7/DCTN5/DNM2/DSP/EGLN1/ENG/FGF8/FGFR2/FOXC1/FOXC2/FOXH1/FRS2/GATA3/GATA4/GJA5/GREB1L/GRHL2/GSK3A/HAND1/HAND2/HEG1/HES1/HEY2/HEYL/ID2/ISL1/JAG1/KCNK2/LRP2/LTBP1/LUZP1/MAML1/MDM2/MDM4/MYBPC3/MYH6/MYH7/MYL2/MYL3/NKX2-5/NOS3/NOTCH1/NPY2R/NPY5R/OVOL2/PAX8/PKP2/PROX1/PTCD2/RARA/RBP4/RBPJ/ROBO1/RXRA/SALL1/SCN5A/SMAD4/SMAD6/SMO/SNX17/SOS1/SRF/TAB1/TBX1/…	87
GO:0007517	BP	GO:0007517	muscle organ development	176/5894	407/18866	1.76e-07	7.31e-06	4.8e-06	ACTA1/AKIRIN1/ALX4/ANKRD1/ANKRD2/ARNTL/ASS1/BCL2/BCL9/BIN3/BMP10/BMP2/BMP4/BMPR1A/BTBD1/CAPN3/CASQ1/CAV1/CAV3/CCNT2/CD164/CDON/CHD2/CHD7/CHRNA1/CHRND/CNTF/CNTFR/COL19A1/COPS2/CREB1/CSRP3/CTDP1/CTF1/CTNNB1/CXADR/CYP26B1/DAG1/DCN/DDX17/DKK1/DSP/EDN1/EEF2/EFNB2/EGLN1/ELN/EMD/ENG/EP300/EPHB1/ERBB4/ETV1/EVC/FBXO22/FGF20/FGF3/FGF8/FGF9/FGFR1/FGFR2/FKTN/FOXC1/FOXC2/FOXH1/FOXN2/FOXO4/FRS2/FZD7/GJA1/GPC1/…	176
GO:0007189	BP	GO:0007189	adenylate cyclase-activating G protein-coupled receptor signaling pathway	76/5894	147/18866	1.83e-07	7.57e-06	4.97e-06	ADCY1/ADCY2/ADCY7/ADCY8/ADCY9/ADCYAP1/ADM/ADM2/ADRA1A/ADRA1B/ADRA2A/ADRA2B/ADRA2C/ADRB1/ADRB2/ADRB3/APLP1/ATP2B4/CALCA/CALCB/CALCR/CALCRL/CNR2/CRHR1/DRD1/DRD2/DRD3/DRD5/FSHR/GALR1/GALR2/GCG/GCGR/GHRH/GHRHR/GLP1R/GNA13/GNAI2/GNAL/GNAS/GPR12/GPR161/GPR3/GPR6/GPR65/GSK3A/IAPP/LHCGR/LPAR2/LPAR3/MC2R/MC3R/MC4R/MC5R/NOS1/OPRL1/OPRM1/PDE4D/PF4/PRKCA/PTGER1/PTGER2/PTGER3/PTGER4/PTGFR/PTGIR/PTH/RAMP1/RAMP…	76
GO:0008202	BP	GO:0008202	steroid metabolic process	148/5894	332/18866	1.85e-07	7.57e-06	4.97e-06	ABCA2/ABCB11/ACADL/ACAT2/ACBD3/ACOT8/ADM/AFP/AGT/AKR1C4/AKR1D1/ANGPTL3/APOA2/APOA4/APOF/ATP1A1/ATP8B1/BAAT/BMP2/BMP5/BMP6/CEBPA/CEL/CETP/CGA/CLN6/COMT/CRH/CUBN/CYB5R1/CYB5R2/CYB5R3/CYP11B1/CYP11B2/CYP17A1/CYP19A1/CYP1A2/CYP1B1/CYP26B1/CYP27A1/CYP2A6/CYP2B6/CYP2R1/CYP39A1/CYP46A1/CYP7A1/CYP7B1/DGKQ/DHRS2/DKKL1/EBP/ERLIN2/ESR1/FASN/FDFT1/FDX1/FDXR/FGF1/FGFR1/FGFR4/FSHB/GAL/GFI1/GGPS1/GNB3/H6PD/HDLB…	148
GO:0050714	BP	GO:0050714	positive regulation of protein secretion	86/5894	172/18866	2.06e-07	8.4e-06	5.52e-06	AACS/ACHE/ADAM9/ADCY8/AGTR2/ANKRD1/APBB1/BAD/BAIAP3/BMP6/C1QTNF3/CASR/CD33/CRH/CRTAM/DNM1L/DOC2B/DRD2/F2RL1/FGB/FGR/GAPDH/GCG/GCK/GIP/GIPR/GJA1/GLMN/GLUD1/GOLPH3/GPI/GPLD1/GPR27/GPR68/HLA-E/HTR2B/IFNG/IL13/IL26/IL5/IL6/INS/IRS2/ISL1/KCNN4/KIF5B/LRP1/MIF/MPC2/NADK/NNAT/NR1H2/NR1H4/OR51E2/P2RX7/PARD6A/PDX1/PLA2G6/PPARD/PPID/PPP3CB/PRKCE/PSMD9/PTGER4/RAC1/RBP4/RGCC/RPH3AL/SCAMP5/SORL1/SRC/STX4/SYBU/…	86
GO:0001655	BP	GO:0001655	urogenital system development	147/5894	330/18866	2.14e-07	8.67e-06	5.69e-06	ACE/ACVR2B/ADIPOQ/AGT/AGTR2/AHI1/ALDH1A2/ANGPT1/APAF1/APH1A/AQP2/ARL3/ASS1/BAG6/BCL2/BDNF/BMP2/BMP4/BMP6/CA2/CDKN1B/CER1/CITED1/COL4A4/CRIP1/CRKL/CRLF1/CTNNB1/CYP19A1/CYP26B1/CYP4A11/CYP7B1/DCHS1/DCN/DLG1/DLG5/EFNB2/EMX2/EPHA4/EPHA7/EPHB3/ESR1/EYA1/FEM1B/FGF1/FGF8/FGFR1/FGFR2/FKBP4/FOXA1/FOXB1/FOXC1/FOXC2/FOXJ1/FRAS1/FRS2/GATA3/GCNT1/GCNT4/GDF11/GDNF/GPC3/GREB1L/HES1/HEYL/HOXB13/HYAL2/ID2/IL6R/IQ…	147
GO:0007548	BP	GO:0007548	sex differentiation	128/5894	280/18866	2.26e-07	9.11e-06	5.99e-06	ACVR1B/ADAM15/ADAM20/ADAM21/ADCYAP1/ADCYAP1R1/AFP/AMHR2/ARID4B/ASB1/ATM/ATRX/BCL2/BCL2L1/BMP5/BMP6/BMPR1A/BMPR1B/CASP3/CBL/CBX2/CCND1/CDKL2/CHD7/CNTFR/CRKL/CTNNB1/CTSV/CYP17A1/CYP19A1/DACH1/DMC1/DMRT1/EIF2B2/ERCC1/ESR1/FGF8/FGF9/FKBP4/FLNA/FNDC3A/FOXC1/FOXF2/FSHB/FSHR/GATA1/GATA3/GATA4/GDF9/GNRH1/GREB1L/HMGCS1/HSD17B3/HYAL3/IDH1/ING2/INHA/INSR/KDM5A/KITLG/KMT2B/LEP/LFNG/LHCGR/LHX1/LRP2/LRP6/LRRC6…	128
GO:0035592	BP	GO:0035592	establishment of protein localization to extracellular region	196/5894	463/18866	2.34e-07	9.38e-06	6.16e-06	AACS/ABCC8/ACHE/ACVR2B/ADAM9/ADCY8/ADCYAP1/ADRA2A/ADRA2C/ADTRP/AFM/AGT/AGTR2/ALOX5/ANKRD1/APBB1/ARL2/ARNTL/BAD/BAIAP3/BMP6/BMP8A/BRSK2/BTN2A2/C1QTNF3/CACNA1C/CACNA1D/CACNA1E/CANX/CARTPT/CASR/CBLN1/CCL5/CD200/CD33/CD40LG/CDK16/COMP/CPLX3/CPT1A/CRH/CRTAM/CTAGE1/CYB5R4/DMTN/DNM1L/DOC2B/DRD2/DRD3/DRD4/DYSF/EPHA5/ERP29/F2RL1/FCGR2B/FGB/FGR/FKBP1B/FOXP3/G6PC2/GAL/GAPDH/GCG/GCK/GHSR/GIP/GIPR/GJA1/GJA5/G…	196
GO:0050808	BP	GO:0050808	synapse organization	185/5894	433/18866	2.38e-07	9.46e-06	6.21e-06	ABL1/ACHE/ACTB/ACTR2/ADD2/ADNP/AFG3L2/ANAPC2/ARC/ARHGAP22/ARHGAP33/ARHGEF15/BCAN/BDNF/BSN/C1QL1/C3/CACNB1/CACNB3/CACNG2/CAMK2B/CAMKV/CAPRIN1/CBLN1/CDC42/CDH1/CDH2/CDH8/CDH9/CDK5R1/CDKL5/CEL/CHRNA1/CHRNB1/CHRNB2/CLN3/CLSTN2/CLSTN3/CNKSR2/CNTN2/CNTN5/COLQ/CRIPT/CRKL/CTBP2/CTNNA2/CTNNB1/CTNND2/CUX2/CX3CL1/DAG1/DBN1/DCTN1/DISC1/DKK1/DLG1/DLG4/DLG5/DNM1L/DNM3/DOCK10/DRD1/DRD2/DSCAM/EFNB2/EGLN1/EPHA4/E…	185
GO:0001508	BP	GO:0001508	action potential	72/5894	138/18866	2.4e-07	9.49e-06	6.23e-06	ADRA1A/ATP1A1/ATP2A2/BIN1/CACNA1C/CACNA1D/CACNA1G/CACNA1I/CACNA2D1/CACNB3/CAV1/CAV3/CD36/CHRNA1/CHRNB2/CHRNB4/CLCN1/CLN3/CNR2/CNTNAP1/CTNNA3/CXADR/DLG1/DRD1/DSP/FGF12/FGF13/FKBP1B/FLNA/GJA1/GJA5/GJD2/GLRA1/GNA11/GPR88/GRIK2/HCN4/JUP/KCNA1/KCNA2/KCNE1/KCNE4/KCNIP2/KCNJ2/KCNJ3/KCNJ5/KCNJ8/KCNMB2/KCNMB4/KCNN2/MTNR1B/NEDD4L/NTSR1/P2RX3/PKP2/RANGRF/SCN10A/SCN11A/SCN1A/SCN1B/SCN2A/SCN3A/SCN3B/SCN4A/SCN…	72
GO:0007254	BP	GO:0007254	JNK cascade	102/5894	213/18866	2.49e-07	9.74e-06	6.39e-06	AGER/AIDA/AMBP/ANKRD6/ARHGEF5/BIRC7/CASR/CCL21/CD40LG/CDC42/CRKL/CYLD/DKK1/EDA2R/EDAR/EDN1/EPHA4/EPHB1/ERCC6/ERN1/ERN2/F2RL1/FCGR2B/FGD2/FKTN/FLT4/FZD10/FZD5/FZD7/GADD45A/GPS1/GPS2/GRIK2/GSTP1/HDAC3/HIPK3/HRAS/IL1B/LTBR/MAP2K7/MAP3K10/MAP3K12/MAP3K13/MAP3K2/MAP3K5/MAP3K6/MAP3K7/MAP4K3/MAP4K4/MAP4K5/MAPK10/MAPK8IP2/MAPK8IP3/MAPK9/MINK1/MMP8/NCF1/NOD1/NOX1/NPHS1/NPPA/PAFAH1B1/PHLPP1/PKN1/PLCB1/PPEF…	102
GO:0030073	BP	GO:0030073	insulin secretion	102/5894	213/18866	2.49e-07	9.74e-06	6.39e-06	AACS/ABCC8/ACVR2B/ADCY8/ADCYAP1/ADRA2A/ADRA2C/ALOX5/ARL2/ARNTL/BAD/BAIAP3/BMP8A/BRSK2/CACNA1C/CACNA1D/CACNA1E/CARTPT/CASR/CCL5/CDK16/CPLX3/CPT1A/CRH/CYB5R4/DOC2B/DRD2/EPHA5/FKBP1B/G6PC2/GAL/GCG/GCK/GHSR/GIP/GIPR/GJA1/GLP1R/GLUD1/GPLD1/GPR27/GPR68/HADH/HMGN3/HNF1A/IFNG/IL1B/IL6/IRS2/ISL1/KCNC2/KIF5B/LEP/LRP1/MC4R/MPC2/MTNR1B/NADK/NNAT/NOS2/NPFF/NR1H4/PCLO/PDX1/PFKL/PICK1/PLA2G6/PPARD/PPP3CA/PPP3CB…	102
GO:0050805	BP	GO:0050805	negative regulation of synaptic transmission	45/5894	75/18866	2.51e-07	9.74e-06	6.4e-06	ABHD6/ACHE/ADCY8/ADIPOQ/ADNP/ADORA1/AGER/ARC/ASIC1/BDNF/CBLN1/CNR2/DRD1/DRD2/DRD3/DRD5/GNAI1/GNAI2/GRIA1/GRIK2/GRIK3/HTR1B/HTR2A/IL1B/NF1/NLGN3/NLGN4X/NPY2R/NPY5R/PICK1/PLA2G6/PLK2/PTEN/PTGS2/PTK2B/S1PR2/SLC24A1/SLC24A2/SLC30A1/SNCA/SORCS3/SRF/STXBP1/SYT11/TNR	45
GO:0050886	BP	GO:0050886	endocrine process	49/5894	84/18866	2.54e-07	9.79e-06	6.43e-06	ACE/AGT/AGTR2/ATP6AP2/AVPR1A/AVPR1B/AVPR2/BMP6/C1QTNF1/C1QTNF3/CORIN/CPA3/CRH/CRHBP/CRHR1/CYP11B2/DRD3/DRD5/EDN1/F2RL1/FGFR1/GAL/GALR1/GATA3/GDF9/GJA1/GJA5/GNAS/HSD11B2/IL1B/INHA/KISS1/KRAS/LEP/NOS3/NOX1/NPVF/OR51E2/OXTR/POMC/PTPN11/RAB11FIP5/REN/RETN/SERPINF2/SMAD4/TAC1/TBX3/TMF1	49
GO:0003231	BP	GO:0003231	cardiac ventricle development	69/5894	131/18866	2.65e-07	1.02e-05	6.67e-06	BMP10/BMP4/BMPR1A/BMPR2/CHD7/DCTN5/DNM2/DSP/EGLN1/ENG/FGFR2/FOXC1/FOXC2/FOXH1/FRS2/GATA3/GATA4/GJA5/GREB1L/GRHL2/GSK3A/HAND1/HAND2/HEG1/HES1/HEY2/HEYL/ID2/ISL1/JAG1/KCNK2/LRP2/LTBP1/LUZP1/MDM2/MDM4/MYBPC3/MYH6/MYH7/MYL2/MYL3/NKX2-5/NOS3/NOTCH1/NPY2R/NPY5R/PAX8/PKP2/PROX1/PTCD2/RBPJ/ROBO1/RXRA/SALL1/SCN5A/SMAD4/SMAD6/TBX3/TGFB2/TNNC1/TNNI1/TNNI3/TNNT2/TRIP11/UBE4B/WNT11/WNT5A/ZFPM2/ZMPSTE24	69
GO:0051952	BP	GO:0051952	regulation of amine transport	52/5894	91/18866	2.75e-07	1.05e-05	6.88e-06	ADORA1/ADRA2A/ADRA2B/ADRA2C/AGT/AGTR2/AVP/AVPR1A/CARTPT/CCK/CHRNA3/CHRNA6/CHRNB2/CRH/DRD1/DRD2/DRD3/DRD4/FGF20/GDNF/GHSR/HRH3/HTR1B/HTR2A/KCNA2/LEP/NPY2R/NPY5R/NTSR1/OXT/OXTR/P2RX7/P2RY1/PSEN1/RAB3A/RAB3B/RAB3GAP1/RGS4/SLC12A2/SLC38A3/SNCA/STXBP1/SYT1/SYT11/SYT12/SYT13/SYT17/SYT2/SYT5/TOR1A/TRH/VIP	52
GO:0034765	BP	GO:0034765	regulation of ion transmembrane transport	205/5894	489/18866	2.95e-07	1.12e-05	7.33e-06	ABL1/ACTN2/ACTN4/ADRA2A/ADRB2/AGT/AKT2/APLNR/ARC/ATG5/ATP2A1/ATP2B4/BDKRB1/BIN1/BPIFA1/CACNA1B/CACNA1C/CACNA1D/CACNA1E/CACNA1F/CACNA1G/CACNA1I/CACNA1S/CACNA2D1/CACNA2D3/CACNB1/CACNB3/CACNG1/CACNG2/CACNG3/CACNG4/CACNG5/CALCR/CAPN3/CASQ1/CAV1/CAV3/CCL2/CCR2/CD63/CHD7/CHRM3/CLCN1/CLCNKB/CLIC1/CLIC2/CNIH3/CRH/CRHBP/CRHR1/CX3CL1/DAPK1/DLG1/DLG4/DNM2/DRD1/DRD2/DRD3/DRD4/DYSF/EPO/F2/F2RL3/FGF12/FGF13/FK…	205
GO:0070661	BP	GO:0070661	leukocyte proliferation	140/5894	313/18866	3.09e-07	1.16e-05	7.6e-06	ABL1/ACE/AGER/AIF1/ATM/BCL2/BMP4/BST1/BTK/BTN2A2/CASP3/CCL5/CCND3/CCR2/CD151/CD1D/CD209/CD28/CD3E/CD40LG/CD46/CD6/CD70/CD74/CDKN1A/CHRNB2/CRP/CRTAM/CSF1/CSF1R/CTNNB1/CX3CL1/DLG1/DLG5/DOCK2/EBI3/EPO/F2RL1/FCGR2B/FKBP1B/FLT3/FLT3LG/FOXJ1/FOXP3/FYN/GAL/GLMN/GNRH1/GPR183/GSTP1/HES1/HHEX/HHLA2/HLA-DMB/HLA-DPA1/HLA-DPB1/HLA-E/IFNA1/IFNA10/IFNA14/IFNA16/IFNA17/IFNA2/IFNA4/IFNA5/IFNA7/IFNA8/IFNB1/IFNW1/I…	140
GO:0071692	BP	GO:0071692	protein localization to extracellular region	198/5894	470/18866	3.09e-07	1.16e-05	7.6e-06	AACS/ABCC8/ACHE/ACVR2B/ADAM9/ADCY8/ADCYAP1/ADRA2A/ADRA2C/ADTRP/AFM/AGT/AGTR2/ALOX5/ANKRD1/APBB1/ARL2/ARNTL/BAD/BAIAP3/BMP6/BMP8A/BRSK2/BTN2A2/C1QTNF3/CACNA1C/CACNA1D/CACNA1E/CANX/CARTPT/CASR/CBLN1/CCL5/CD200/CD33/CD40LG/CDK16/CER1/COMP/CPLX3/CPT1A/CRH/CRTAM/CTAGE1/CYB5R4/DMTN/DNM1L/DOC2B/DRD2/DRD3/DRD4/DYSF/EPHA5/ERP29/F2RL1/FCGR2B/FGB/FGR/FKBP1B/FOXP3/G6PC2/GAL/GAPDH/GCG/GCK/GHSR/GIP/GIPR/GJA1/G…	198
GO:0009306	BP	GO:0009306	protein secretion	195/5894	462/18866	3.23e-07	1.2e-05	7.9e-06	AACS/ABCC8/ACHE/ACVR2B/ADAM9/ADCY8/ADCYAP1/ADRA2A/ADRA2C/ADTRP/AGT/AGTR2/ALOX5/ANKRD1/APBB1/ARL2/ARNTL/BAD/BAIAP3/BMP6/BMP8A/BRSK2/BTN2A2/C1QTNF3/CACNA1C/CACNA1D/CACNA1E/CANX/CARTPT/CASR/CBLN1/CCL5/CD200/CD33/CD40LG/CDK16/COMP/CPLX3/CPT1A/CRH/CRTAM/CTAGE1/CYB5R4/DMTN/DNM1L/DOC2B/DRD2/DRD3/DRD4/DYSF/EPHA5/ERP29/F2RL1/FCGR2B/FGB/FGR/FKBP1B/FOXP3/G6PC2/GAL/GAPDH/GCG/GCK/GHSR/GIP/GIPR/GJA1/GJA5/GLMN/…	195
GO:0032535	BP	GO:0032535	regulation of cellular component size	166/5894	383/18866	3.27e-07	1.21e-05	7.93e-06	ABL1/ACTN2/ACTR2/ACTR3/ADD2/ADD3/ADNP/ALOX15/ANAPC2/ANXA7/AP1AR/AQP4/ARFIP2/ARHGAP28/ARHGAP35/ARHGAP4/ARPC1A/ARPC4/ARPC5L/ARPIN/BAG4/BAIAP2L2/BBS4/BDNF/BIN1/BMPR2/CAPG/CAPZA1/CAPZA2/CAV3/CCL11/CCL21/CCL24/CDC42EP1/CDC42EP2/CDH4/CDHR5/CDK5R1/CDKL3/CDKL5/CLCN6/CLN3/CNTN2/CORO1B/CREB1/CSF3/CTNNA2/DBN1/DCC/DISC1/DLG1/DMTN/DNM2/DPYSL2/DSCAM/EDN1/ELN/EPHA7/EPS8/F2RL1/FGF13/FHOD3/FSTL4/GNB3/GRB2/HAX1/HC…	166
GO:0050770	BP	GO:0050770	regulation of axonogenesis	91/5894	186/18866	3.28e-07	1.21e-05	7.93e-06	ABL1/ADNP/ANAPC2/ARHGAP35/ARHGAP4/ARHGDIA/BDNF/BMPR2/BRSK2/CDH2/CDH4/CDK5R1/CDKL3/CDKL5/CNTN2/DAB1/DBN1/DCC/DISC1/DNM2/DPYSL2/DSCAM/EFNB3/EPHA4/EPHA7/EPHB3/FEZF2/FGF13/FSTL4/GRIN1/IFRD1/IST1/KEL/KIAA0319/L1CAM/LPAR3/LRP1/LRP4/MAG/MAP2/MAP3K13/MCF2/MEGF8/METRN/MT3/NDEL1/NGF/NGFR/NIN/NTN1/OLFM1/PAFAH1B1/PAK3/PLXNB2/POU3F2/POU4F2/PSEN1/PTEN/PTPRO/PTPRS/RAB21/RET/RND2/RNF6/ROBO1/RTN4/SEMA3A/SEMA3B/SE…	91
GO:0050796	BP	GO:0050796	regulation of insulin secretion	89/5894	181/18866	3.32e-07	1.21e-05	7.97e-06	AACS/ABCC8/ADCY8/ADRA2A/ADRA2C/ALOX5/ARL2/ARNTL/BAD/BAIAP3/BMP8A/BRSK2/CACNA1C/CACNA1D/CACNA1E/CARTPT/CASR/CCL5/CDK16/CPT1A/CRH/DOC2B/DRD2/EPHA5/FKBP1B/G6PC2/GCG/GCK/GHSR/GIP/GIPR/GJA1/GLP1R/GLUD1/GPLD1/GPR27/GPR68/HADH/HMGN3/IFNG/IL1B/IL6/IRS2/ISL1/KCNC2/KIF5B/LEP/LRP1/MPC2/MTNR1B/NADK/NNAT/NOS2/NPFF/NR1H4/PDX1/PFKL/PICK1/PLA2G6/PPARD/PPP3CA/PPP3CB/PRKCA/PRKCE/PSMD9/PTPN11/RAC1/RAPGEF4/RBP4/REST…	89
GO:0042593	BP	GO:0042593	glucose homeostasis	114/5894	245/18866	3.35e-07	1.22e-05	8.01e-06	AACS/ADCY8/ADIPOQ/ADRA2A/AGER/ALOX5/APPL2/BAD/BAIAP3/BCKDK/BRSK2/CARTPT/CASR/CAV3/CDK16/CEBPA/CPB2/CRH/CSRP3/CYB5R4/CYP11B1/CYP7A1/DBH/ENDOG/EPHA5/ERN1/FABP5/FFAR2/FGFR4/FKBP1B/FOXA1/FOXO1/FOXO4/G6PC2/GAS6/GATA4/GCG/GCGR/GCK/GHRHR/GPLD1/GPR21/GPR27/GPR68/GRIK5/HKDC1/HMGN3/HNF1A/IGFBP5/IL6/INPP5K/INS/INSR/IRS2/KIF5B/KLF15/LEP/LIN28A/LRP1/MLXIPL/MPC2/MTNR1B/NADK/NGFR/NR1H4/OAS1/PAX2/PAX6/PCK1/PDK3/…	114
GO:0045471	BP	GO:0045471	response to ethanol	65/5894	122/18866	3.37e-07	1.22e-05	8.01e-06	AACS/ACTR2/ADCY7/ADCYAP1/ADCYAP1R1/ADIPOQ/APOBEC1/AVP/BAD/CA3/CASP8/CBL/CCND1/CHRNB2/CLDN3/CRH/CRHBP/CSF3/DBH/DNMT3A/DRD2/DRD4/EEF2/EIF4EBP1/EPS8/FECH/FGFR2/FYN/GATA3/GLRA1/GLRA2/GNRH1/GRIN1/GRIN2A/GRIN2B/GSTP1/HDAC2/HTR1B/HTR3A/IL13/KCNC2/LEP/MSTN/NPPC/NQO1/OGG1/OPRM1/PEMT/PENK/POLB/PRKAA1/PRKCE/PTEN/PTH/PTK2B/RARA/RBP4/RGS4/S100A8/SLC2A4/SLC6A3/SOD1/STAR/STAT3/TH	65
GO:0071695	BP	GO:0071695	anatomical structure maturation	110/5894	235/18866	3.7e-07	1.33e-05	8.74e-06	ABHD2/ACTL6B/ALDH1A2/ANKRD17/ARCN1/ASCL1/B4GALT6/BCL11A/BCL2/BFSP1/BFSP2/BMP2/BRD1/BTK/C1QL1/C3/CCL21/CCR6/CDH5/CDK5R1/CDK5R2/CDKN1A/CEBPA/CEND1/CLEC7A/CLN5/CNTN2/CTNNB1/CX3CL1/DAG1/DAZL/DCHS1/DEFB1/DLD/DMC1/ELSPBP1/EPAS1/EPB42/EPO/ERCC2/FEM1B/FEV/FGFR1/FGFR3/FOXA1/FZD5/GAL/GATA3/GDF11/GH1/GHRHR/GRIN1/HES1/HOXA5/HOXB13/ID2/IL15/IL21/KCNIP2/LEP/LHX6/LTF/LYL1/MAP3K13/MBTPS2/MECP2/MTOR/NF1/NPPC/NPR2…	110
GO:0014065	BP	GO:0014065	phosphatidylinositol 3-kinase signaling	78/5894	154/18866	3.81e-07	1.37e-05	8.97e-06	AGT/ANGPT1/BECN1/BTN2A2/C1QBP/CBL/CCL5/CD160/CD28/CRYBA1/CSF3/DCN/EDN1/EPO/EPOR/ERBB4/F2/F2RL1/FBXL2/FGFR1/FGR/FLT1/FLT3/FSHR/FYN/GATA3/GH1/HAX1/HCLS1/HGF/HTR2A/HTR2B/INS/INSR/IRS2/KDR/LEP/LIME1/LTK/MAPK1/NCF1/NEDD4/NF1/NTF3/NTRK1/OSM/PDGFB/PDGFD/PIK3CB/PIK3CG/PIK3IP1/PIK3R2/PIK3R5/PIP4K2A/PIP4K2B/PIP4K2C/PIP5K1A/PLEKHA1/PPARD/PPP2R5B/PPP2R5C/PREX2/PTEN/PTPN13/ROR2/SELP/SIRT2/SOX9/SRC/STAMBP/TGFB…	78
GO:0022604	BP	GO:0022604	regulation of cell morphogenesis	208/5894	499/18866	3.98e-07	1.42e-05	9.31e-06	ABL1/ACTN4/ACTR2/ADNP/ALDOA/ANAPC2/ANKRD27/ANXA7/AP1AR/ARC/ARHGAP33/ARHGAP35/ARHGAP4/ARHGDIA/ARHGEF18/ARHGEF7/ARPIN/ATP10A/BCL11A/BDNF/BMPR2/BRSK2/BRWD1/C1QBP/CAMK2B/CAPRIN1/CASS4/CCL11/CCL13/CCL2/CCL24/CD44/CDC42/CDC42EP1/CDC42EP2/CDC42SE1/CDH2/CDH4/CDK5R1/CDKL3/CDKL5/CHRNA3/CHRNB2/CIB1/CLDN3/CNTN2/CORO1B/CPNE6/CRK/CRKL/CSF1R/CSPG5/CUL7/CUX2/DAB1/DAG1/DBN1/DCC/DISC1/DLG1/DLG4/DMTN/DNM1L/DNM2/DNM…	208
GO:0060415	BP	GO:0060415	muscle tissue morphogenesis	45/5894	76/18866	4.3e-07	1.52e-05	9.99e-06	ANKRD1/BMP10/BMP2/BMPR1A/CHD7/DSP/EGLN1/ENG/FGFR2/FOXC1/FOXC2/FOXH1/HAND1/HEG1/HEY2/ISL1/LRP2/MYBPC3/MYF5/MYF6/MYH6/MYH7/MYL2/MYL3/NKX2-5/NOTCH1/PAX7/PKP2/PROX1/PTCD2/RBPJ/RXRA/SIRT6/SMAD4/TBX1/TCAP/TGFB2/TNNC1/TNNI1/TNNI3/TNNT2/TTN/UBE4B/WNT5A/ZFPM2	45
GO:0033500	BP	GO:0033500	carbohydrate homeostasis	114/5894	246/18866	4.34e-07	1.53e-05	1e-05	AACS/ADCY8/ADIPOQ/ADRA2A/AGER/ALOX5/APPL2/BAD/BAIAP3/BCKDK/BRSK2/CARTPT/CASR/CAV3/CDK16/CEBPA/CPB2/CRH/CSRP3/CYB5R4/CYP11B1/CYP7A1/DBH/ENDOG/EPHA5/ERN1/FABP5/FFAR2/FGFR4/FKBP1B/FOXA1/FOXO1/FOXO4/G6PC2/GAS6/GATA4/GCG/GCGR/GCK/GHRHR/GPLD1/GPR21/GPR27/GPR68/GRIK5/HKDC1/HMGN3/HNF1A/IGFBP5/IL6/INPP5K/INS/INSR/IRS2/KIF5B/KLF15/LEP/LIN28A/LRP1/MLXIPL/MPC2/MTNR1B/NADK/NGFR/NR1H4/OAS1/PAX2/PAX6/PCK1/PDK3/…	114
GO:0048644	BP	GO:0048644	muscle organ morphogenesis	48/5894	83/18866	4.8e-07	1.68e-05	1.1e-05	ANKRD1/BMP10/BMP2/BMPR1A/CHD7/CNTF/DSP/EGLN1/ENG/FGFR2/FOXC1/FOXC2/FOXH1/HAND1/HEG1/HEY2/ISL1/LIF/LRP2/MYBPC3/MYF5/MYF6/MYH6/MYH7/MYL2/MYL3/NKX2-5/NOTCH1/PAX7/PKP2/PROX1/PTCD2/RBPJ/RXRA/SIRT6/SMAD4/TBX1/TCAP/TCF15/TGFB2/TNNC1/TNNI1/TNNI3/TNNT2/TTN/UBE4B/WNT5A/ZFPM2	48
GO:0060560	BP	GO:0060560	developmental growth involved in morphogenesis	110/5894	236/18866	4.81e-07	1.68e-05	1.1e-05	ABL1/ADNP/ANAPC2/ARHGAP4/BCL11A/BDNF/BIN3/BMP4/BMPR2/CCL11/CDH4/CDK5R1/CDKL3/CDKL5/CPNE6/CSF1/CTNNB1/DBN1/DCC/DISC1/DNM2/DPYSL2/DSCAM/EMX1/EPB41L5/EPHA7/ESR1/FGF1/FGF13/FGFR2/FLRT1/FLRT3/FSTL4/HDAC6/IFRD1/IMPACT/IQGAP1/IST1/KDM5B/KIAA0319/L1CAM/LHX1/LLPH/LPAR3/LRP1/LRP6/MAG/MAGI2/MAP2/MAP3K13/MED12/MEGF8/MT3/NDEL1/NDN/NEDD4L/NGF/NIN/NLGN3/NOTCH1/NTN1/OLFM1/PAFAH1B1/PAK6/PLAA/POU4F2/POU4F3/PPP3CB/…	110
GO:0051091	BP	GO:0051091	positive regulation of DNA-binding transcription factor activity	123/5894	270/18866	4.86e-07	1.68e-05	1.11e-05	ADCY1/ADCY8/AGER/AGT/ARHGEF2/ARHGEF5/ATF2/BEX1/BTK/CAMK2A/CAPN3/CAV1/CD200/CD36/CD40LG/CEBPG/CHUK/CIB1/CRTC1/CRTC3/CSF3/CTH/CTNNB1/CX3CL1/CYTL1/EDA/EDA2R/EDN1/EP300/EPHA5/ERC1/ESR1/ESR2/FLOT2/FOSL1/FOXA1/HCLS1/HDAC4/IKBKB/IL18R1/IL18RAP/IL1B/IL5/IL6/INS/IRAK3/JUP/KRAS/LAMTOR5/LGALS9/LRP6/LTF/MALT1/MAP3K13/MAP3K7/MAVS/MBTPS2/NDP/NEUROD2/NEUROG1/NEUROG2/NEUROG3/NFKB1/NKX2-2/NLRP3/NOD1/NPM1/NTRK1/PI…	123
GO:0060048	BP	GO:0060048	cardiac muscle contraction	72/5894	140/18866	4.97e-07	1.71e-05	1.12e-05	ADORA1/ADRA1A/ADRA1B/ATP1A1/ATP2A1/ATP2A2/BIN1/BMP10/CACNA1C/CACNA1D/CACNA1G/CACNA2D1/CAV1/CAV3/CLIC2/CSRP3/CTNNA3/DLG1/DSP/FGF12/FGF13/FKBP1B/FLNA/GATA4/GJA1/GJA5/GSTM2/HCN4/HDAC4/JUP/KCNE1/KCNE4/KCNJ2/KCNJ3/KCNJ5/KCNJ8/KCNN2/MAP2K6/MTOR/MYBPC3/MYH6/MYH7/MYL1/MYL2/MYL3/MYL4/NEDD4L/NKX2-5/NOS1/NPPA/PDE4B/PDE4D/PIK3CG/PKP2/PRKACA/RANGRF/SCN10A/SCN1A/SCN1B/SCN3B/SCN5A/SLC8A1/SMAD5/SNTA1/TCAP/TNNC1/…	72
GO:0032943	BP	GO:0032943	mononuclear cell proliferation	129/5894	286/18866	5.07e-07	1.74e-05	1.14e-05	ABL1/ACE/AGER/AIF1/ATM/BCL2/BMP4/BST1/BTK/BTN2A2/CASP3/CCL5/CCND3/CCR2/CD151/CD1D/CD209/CD28/CD3E/CD40LG/CD46/CD6/CD70/CD74/CDKN1A/CHRNB2/CRP/CRTAM/CSF1/CTNNB1/DLG1/DLG5/DOCK2/EBI3/EPO/FCGR2B/FKBP1B/FLT3/FLT3LG/FOXJ1/FOXP3/FYN/GAL/GLMN/GNRH1/GPR183/HES1/HHLA2/HLA-DMB/HLA-DPA1/HLA-DPB1/HLA-E/IFNA1/IFNA10/IFNA14/IFNA16/IFNA17/IFNA2/IFNA4/IFNA5/IFNA7/IFNA8/IFNB1/IFNW1/IGFBP2/IKZF3/IL12B/IL12RB1/IL13…	129
GO:0046427	BP	GO:0046427	positive regulation of receptor signaling pathway via JAK-STAT	51/5894	90/18866	5.09e-07	1.74e-05	1.14e-05	AGT/CCL5/CENPJ/CNTF/CRLF1/CRLF3/CSF1R/CSF2/CSH1/CTF1/CYP1B1/EPO/ERBB4/F2/FGFR3/FLT3/FYN/GH1/GH2/GHR/HCLS1/HDAC2/HES1/HPX/IFNA2/IFNG/IL12B/IL13/IL15/IL21/IL23A/IL26/IL3/IL4/IL5/IL6/IL6R/ISL1/LEP/LIF/NOTCH1/OSM/PECAM1/PIBF1/PRL/PRLR/PTK2B/STAT3/TNF/TNFRSF1A/TNFSF18	51
GO:0044262	BP	GO:0044262	cellular carbohydrate metabolic process	132/5894	294/18866	5.14e-07	1.74e-05	1.15e-05	ADCYAP1R1/ADIPOQ/AGL/AKT2/ANGPTL3/AOAH/ARPP19/AVPR1B/B3GALNT1/B3GALT1/B3GALT2/B3GNT4/BAD/BPNT1/C1QTNF1/C1QTNF3/CBFA2T3/COQ2/COQ3/COX11/DGKQ/DYRK2/DYSF/ENOSF1/EP300/ESRRB/FGGY/FOXO1/GALK2/GBA3/GCG/GCGR/GCK/GK/GK2/GNB3/GNMT/GNPTAB/GPD2/GPLD1/GPT/GSK3A/GYG1/GYG2/GYS1/HAS1/HDAC4/HKDC1/HS2ST1/IDH1/IDH2/IDUA/IMPA1/INPP5B/INPP5J/INPP5K/INS/INSR/IPPK/IRS2/ITPK1/ITPKA/KHK/LALBA/LCMT1/LEP/LHCGR/MECP2/MGAM/…	132
GO:0001504	BP	GO:0001504	neurotransmitter uptake	29/5894	42/18866	5.23e-07	1.76e-05	1.16e-05	DRD1/DRD2/DRD3/DRD4/GDNF/ITGB3/KCNJ10/NOS1/RAB3B/SLC18A1/SLC18A2/SLC1A2/SLC1A3/SLC1A6/SLC1A7/SLC22A1/SLC22A2/SLC22A3/SLC29A1/SLC29A2/SLC6A11/SLC6A2/SLC6A3/SLC6A5/SLC6A9/SNAP25/SNCA/SYNGR3/TOR1A	29
GO:0035264	BP	GO:0035264	multicellular organism growth	76/5894	150/18866	5.26e-07	1.76e-05	1.16e-05	ADRB1/ADRB2/AFG3L2/ANKRD11/APBA1/APBA2/ATM/ATP8A2/ATRX/BBS4/BCL2/CHD7/COMP/CREB1/CSF1/CTC1/DIO3/DRD2/DRD3/EP300/ERCC1/ERCC2/ERCC6/ETNK2/GAMT/GDF15/GDF5/GH1/GHR/GHRH/GHRHR/GHSR/GNAS/GPD2/GPR21/GRHL2/HEG1/HOXA5/LGMN/MTOR/NIPBL/NPPC/PDE4D/PLEKHA1/POU1F1/POU3F2/PRL/PRLH/PTCH1/PTPN11/RAI1/RARA/RBBP6/RC3H2/SGPL1/SLC12A5/SLC1A2/SLC4A10/SLC6A3/SMO/SOCS2/SOD1/SOS1/SP2/SPTBN4/STAT3/STAT5A/STAT5B/TAF10/TMED…	76
GO:0007613	BP	GO:0007613	memory	64/5894	121/18866	5.83e-07	1.95e-05	1.28e-05	ABCA7/ADCY1/ADCY8/ADNP/ARC/ASIC1/ATXN1/BDNF/BRINP1/CAMK4/CCK/CHRNB2/COMT/CREB1/CRTC1/CUX2/DBH/DRD1/DRD2/FGF13/GIP/GRIA1/GRIN1/GRIN2A/HRH2/HTR2A/INSR/JPH3/KALRN/KCNK10/KCNK2/KMT2B/LDLR/LGMN/MECP2/MTOR/MUSK/NGF/NQO2/NTAN1/NTF3/OXT/OXTR/PAK6/PLA2G6/PLCB1/PLK2/PPP3CB/PRKCZ/PSEN1/PTEN/PTGS2/RASGRF1/RIN1/SCN2A/SHANK1/SLC17A7/SLC24A2/SLC2A4/SORCS3/SRF/SYT11/TAC1/TH	64
GO:0061337	BP	GO:0061337	cardiac conduction	75/5894	148/18866	6.17e-07	2.05e-05	1.35e-05	ABCC9/AGT/ATP1A1/ATP2A1/ATP2A2/ATP2B2/ATP2B3/ATP2B4/BIN1/CACNA1C/CACNA1D/CACNA1F/CACNA1G/CACNA1S/CACNA2D1/CACNA2D3/CACNB1/CACNB3/CACNG1/CACNG2/CACNG3/CACNG4/CACNG5/CASQ1/CAV1/CORIN/CTNNA3/CXADR/DSP/FKBP1B/FLNA/FXYD2/FXYD3/FXYD6/FXYD7/GJA1/GJA5/HCN4/JUP/KCND1/KCNE1/KCNE4/KCNH6/KCNIP1/KCNIP2/KCNJ14/KCNJ2/KCNJ3/KCNJ4/KCNJ5/KCNK1/KCNK15/KCNN2/NKX2-5/NOS1/NPPA/NPPC/NPR2/PDE4D/PKP2/PRKACA/RANGRF/RYR3/S…	75
GO:0003206	BP	GO:0003206	cardiac chamber morphogenesis	68/5894	131/18866	6.56e-07	2.17e-05	1.42e-05	BMP10/BMP4/BMP5/BMPR1A/BMPR2/CAV3/CHD7/DSP/EGLN1/ENG/FGF8/FGFR2/FOXC1/FOXC2/FOXH1/GATA3/GATA4/GJA5/GRHL2/GSK3A/HAND1/HAND2/HEG1/HES1/HEY2/HEYL/ID2/ISL1/JAG1/LRP2/MDM2/MYBPC3/MYH6/MYH7/MYL2/MYL3/NKX2-5/NOS3/NOTCH1/NPY2R/NPY5R/OVOL2/PKP2/PROX1/PTCD2/RARA/RBP4/RBPJ/ROBO1/RXRA/SMAD4/SMAD6/SMO/SOS1/SRF/TBX1/TBX2/TBX3/TGFB2/TNNC1/TNNI1/TNNI3/TNNT2/TP53/UBE4B/WNT11/WNT5A/ZFPM2	68
GO:0032355	BP	GO:0032355	response to estradiol	72/5894	141/18866	7.07e-07	2.32e-05	1.52e-05	ABCC2/ADCYAP1R1/AGT/ALDH1A2/ARNT2/ASS1/BAD/CASP3/CASP8/CCND1/CDKN1B/CRHBP/CSN1S1/CTNNB1/CYP19A1/CYP1A2/DNMT3A/EEF2/ENDOG/ESR1/ESR2/ESRRA/ETS1/F7/FOXA1/GGT5/GH1/GHSR/GJA1/GSTP1/HNRNPD/HTR5A/IGFBP2/ITGA2/KAT5/LEP/MBD1/MBD3/MMP15/MYOD1/MYOG/NCOA3/NCOR2/NQO1/NRIP1/OGG1/OPRL1/OXT/OXTR/PAM/PENK/POU4F2/PTCH1/PTEN/PTGFR/PTGS2/RAMP3/RARA/RGS9/SLC34A1/SOCS2/SSTR1/SSTR2/SSTR3/STAT3/STAT5B/STXBP1/TACR3/TFPI/…	72
GO:0040014	BP	GO:0040014	regulation of multicellular organism growth	41/5894	68/18866	7.08e-07	2.32e-05	1.52e-05	ADRB1/ADRB2/AFG3L2/ATP8A2/BBS4/BCL2/CHD7/CREB1/CSF1/DIO3/DRD2/DRD3/GAMT/GDF15/GDF5/GH1/GHR/GHRH/GHRHR/GHSR/GPR21/LGMN/NIPBL/NPPC/POU1F1/POU3F2/PRL/PRLH/PTCH1/RAI1/SGPL1/SLC6A3/SMO/SOCS2/SOD1/SPTBN4/STAT3/STAT5A/STAT5B/VIL1/ZMPSTE24	41
GO:0008361	BP	GO:0008361	regulation of cell size	88/5894	181/18866	7.17e-07	2.33e-05	1.53e-05	ABL1/ADNP/ANAPC2/ANXA7/AQP4/ARHGAP4/BDNF/BMPR2/CAV3/CDH4/CDK5R1/CDKL3/CDKL5/CLCN6/CLN3/CREB1/DBN1/DCC/DISC1/DNM2/DPYSL2/DSCAM/EDN1/EPHA7/FGF13/FSTL4/GNB3/IFRD1/IL7R/IST1/KCNN4/KEL/KIAA0319/L1CAM/LAMTOR5/LPAR3/LRP1/MAG/MAP2/MAP3K13/MEGF8/MT3/MTOR/NDEL1/NGF/NTN1/OLFM1/P2RX7/PAFAH1B1/POU4F2/PTEN/PTPRS/RAB21/RAC1/RAP1GAP2/RB1CC1/RDX/RET/RND2/RNF6/RTN4/SCT/SCTR/SEMA3A/SEMA3B/SEMA3D/SEMA4A/SEMA4G/SEMA6…	88
GO:0017157	BP	GO:0017157	regulation of exocytosis	104/5894	222/18866	7.24e-07	2.34e-05	1.53e-05	ADCY1/ADRA1A/ADRA2A/AP1G1/APBA1/APBA2/ATP2A2/ATP6AP1/BACE1/BAIAP3/BCR/CACNA1D/CACNA1G/CACNA1I/CADPS/CADPS2/CCR2/CD177/CDK5R2/CHRM2/CHRNA6/CHRNB2/CHRNB3/CLASP1/CPLX2/CPLX3/CSPG5/DNM1L/DOC2A/DOC2B/DRD1/DRD2/F2RL1/FCGR2B/FES/FGB/FGR/GNAI2/GRIK5/HAP1/HGS/HTR1B/HTR2A/HYAL3/IFNG/IL13/IL4/IL4R/LAMP1/LGALS9/MICAL1/NCS1/NOTCH1/NPPA/P2RY1/P2RY4/PCLO/PLA2G3/PLA2G6/PPFIA2/PREPL/PRKCG/PTAFR/RAB13/RAB21/RAB26/…	104
GO:0048813	BP	GO:0048813	dendrite morphogenesis	74/5894	146/18866	7.24e-07	2.34e-05	1.53e-05	ACTR2/ANAPC2/ANKRD27/ARC/ARHGAP33/BTBD3/CAMK2B/CAPRIN1/CDC42/CDK5R1/CDKL3/CDKL5/CELSR2/CHRNA3/CHRNB2/CTNNA2/CTNND2/CUL7/CUX2/DBN1/DLG4/DNM1L/DNM3/DOCK10/DSCAM/EPHA4/EPHB1/EPHB3/FBXO31/FYN/GRIN1/HDAC6/HECW1/ID1/ITPKA/KALRN/KIDINS220/KIF1A/LRP4/MAP2/MAPK8IP2/MINK1/NEDD4/NEDD4L/NEUROG3/NLGN3/NR2E1/OBSL1/PAFAH1B1/PAK3/PARP6/PHACTR1/PICALM/PPFIA2/PPP3CA/PQBP1/PREX2/PTEN/PTPRD/RAB21/RBFOX2/SEMA3A/SHANK…	74
GO:0099565	BP	GO:0099565	chemical synaptic transmission	postsynaptic	60/5894	112/18866	7.36e-07	2.36e-05	1.55e-05	ADORA1/ADRB2/BDNF/CACNB3/CBLN1/CHRNA1/CHRNA10/CHRNA2/CHRNA3/CHRNA6/CHRNA9/CHRNB1/CHRNB2/CHRNB3/CHRNB4/CHRND/CHRNE/CHRNG/CUX2/DLG4/DRD2/DRD4/GABRB3/GLRA1/GLRA2/GLRA3/GLRB/GRIK2/GRIK5/GRIN1/GRIN2A/GRIN2B/GRIN2C/GRIN2D/GSK3A/IGSF9B/MAPK8IP2/MECP2/MPP2/NLGN3/NLGN4X/NPFF/NPY2R/NTSR1/OPRM1/P2RX3/P2RX6/P2RX7/PPP3CA/PRKCZ/PTEN/PTK2B/RAB3GAP1/RGS4/S1PR2/SHANK1/SLC17A7/SLC29A1/WNT7A/ZMYND8	60
GO:0070374	BP	GO:0070374	positive regulation of ERK1 and ERK2 cascade	101/5894	215/18866	8.86e-07	2.83e-05	1.86e-05	ABCA7/ABL1/ADCYAP1/ADRA1A/AGER/ALOX15/ANGPT1/ATP6AP1/BMP2/BMP4/C5AR2/CALCR/CASR/CCL1/CCL11/CCL13/CCL16/CCL2/CCL21/CCL23/CCL24/CCL25/CCL5/CD36/CD44/CD74/CIB1/CRKL/CSF1R/CX3CL1/DRD2/DSTYK/EPO/ERBB4/F2RL1/FGB/FGF18/FGF20/FGF4/FGF8/FGFR2/FGFR3/FGFR4/FLT4/FSHR/GAS6/GATA4/GCG/GCNT2/GNAI2/GPR183/HAND2/HCRTR1/HRAS/HTR2A/HTR2B/HTR2C/IL26/KDR/LGALS9/LRP1/MAP2K7/MAP3K12/MARCO/MIF/MT3/NDRG4/NECAB2/NOD1/NOTCH…	101
GO:0003208	BP	GO:0003208	cardiac ventricle morphogenesis	43/5894	73/18866	9.41e-07	2.99e-05	1.96e-05	BMP10/BMPR1A/CHD7/DSP/ENG/FGFR2/FOXC1/FOXC2/FOXH1/GATA3/GATA4/GRHL2/GSK3A/HAND1/HAND2/HEG1/HEY2/HEYL/ISL1/JAG1/LRP2/MYBPC3/MYH6/MYH7/MYL2/MYL3/NKX2-5/NOTCH1/NPY2R/NPY5R/PKP2/PROX1/PTCD2/RBPJ/RXRA/SMAD4/TGFB2/TNNC1/TNNI1/TNNI3/TNNT2/UBE4B/ZFPM2	43
GO:0014075	BP	GO:0014075	response to amine	31/5894	47/18866	1.01e-06	3.2e-05	2.1e-05	ADAMTS13/ASIC1/ASS1/CNR2/CPS1/DBH/DRD1/DRD2/DRD3/DRD4/DRD5/GRIN1/GRIN2A/HDAC2/HDAC9/ITGA2/KCNC1/KCNC2/OXT/OXTR/PDE1B/PPP3CA/RANBP2/RGS17/RGS4/RGS9/SLC18A2/SOD1/TH/TRDMT1/UROS	31
GO:1903305	BP	GO:1903305	regulation of regulated secretory pathway	80/5894	162/18866	1.03e-06	3.23e-05	2.12e-05	ADCY1/ADRA1A/ADRA2A/AP1G1/APBA1/APBA2/ATP2A2/BACE1/BAIAP3/BCR/CACNA1D/CACNA1G/CACNA1I/CCR2/CD177/CDK5R2/CHRM2/CHRNA6/CHRNB2/CHRNB3/CPLX2/CPLX3/CSPG5/DNM1L/DOC2A/DOC2B/DRD1/DRD2/F2RL1/FCGR2B/FES/FGR/GNAI2/GRIK5/HTR1B/HTR2A/HYAL3/IL13/IL4/IL4R/LAMP1/LGALS9/MICAL1/NCS1/NOTCH1/NPPA/P2RY1/P2RY4/PLA2G3/PPFIA2/PREPL/PRKCG/PTAFR/RAB3A/RAB3D/RAB3GAP1/REST/RIMS3/RPH3AL/SCAMP5/SLC4A8/SPHK2/STX4/STXBP1/STXBP…	80
GO:0007215	BP	GO:0007215	glutamate receptor signaling pathway	55/5894	101/18866	1.06e-06	3.32e-05	2.18e-05	ACTN2/ADRB2/ARC/CACNG2/CACNG3/CACNG4/CACNG5/CCL2/CCR2/CDK5R1/CLN3/CNIH3/CRH/CRHBP/CX3CL1/DAPK1/DLG1/DLG4/FYN/GRIA1/GRIA2/GRIA3/GRIA4/GRIK1/GRIK2/GRIK3/GRIK4/GRIK5/GRIN1/GRIN2A/GRIN2B/GRIN2C/GRIN2D/GRM1/GRM2/GRM3/GRM4/GRM5/GRM6/GRM8/IFNG/MAPK8IP2/MINK1/NECAB2/NLGN3/OPRM1/PLCB1/PTK2B/RASGRF1/RGS9/SHANK1/SLC6A9/SSTR1/TRPM1/UNC13A	55
GO:0014047	BP	GO:0014047	glutamate secretion	30/5894	45/18866	1.07e-06	3.35e-05	2.2e-05	ADORA1/APBA1/AVP/AVPR1A/BDNF/CCK/GJA1/GLS2/GRM2/HRH3/NF1/NPY5R/NTSR1/P2RX7/PPFIA2/PPFIA3/PPFIA4/RAB3A/RAB3GAP1/SLC17A7/SLC1A1/SLC1A2/SLC1A3/SLC1A6/SLC1A7/SLC38A2/SNAP25/STXBP1/SYT1/TRH	30
GO:0097305	BP	GO:0097305	response to alcohol	108/5894	234/18866	1.1e-06	3.41e-05	2.24e-05	AACS/AANAT/ABCA2/ACTR2/ADAM15/ADCY1/ADCY2/ADCY7/ADCY8/ADCYAP1/ADCYAP1R1/ADIPOQ/APOBEC1/AVP/AVPR1A/BAD/BCL2L1/CA3/CASP8/CBL/CCL21/CCND1/CDH1/CDKN1A/CHRNB2/CLDN3/CRH/CRHBP/CSF3/CSN1S1/CTNNB1/CYP7A1/DAG1/DBH/DNMT3A/DRD2/DRD4/EEF2/EIF4EBP1/EPS8/F7/FDX1/FECH/FGFR2/FOSL1/FYN/GATA3/GLRA1/GLRA2/GNAI1/GNRH1/GOLPH3/GPLD1/GRAMD1B/GRIN1/GRIN2A/GRIN2B/GSTP1/HDAC2/HMGCS1/HNRNPD/HSD3B1/HSD3B2/HTR1B/HTR3A/IL13/J…	108
GO:0097755	BP	GO:0097755	positive regulation of blood vessel diameter	37/5894	60/18866	1.12e-06	3.47e-05	2.28e-05	ADCYAP1/ADM/ADORA1/ADRB1/ADRB2/ADRB3/AGT/AGTR2/ATG5/BMPR2/CALCA/CASR/CPS1/DOCK5/DRD1/F2RL1/GCH1/GJA1/GJA5/GPX1/INS/ITGA1/KNG1/LEP/MTNR1B/NOS1/NOS3/NPPA/NPPC/PLA2G6/PPARD/PRKG1/PTAFR/PTPRM/SCPEP1/SOD1/VIP	37
GO:0001975	BP	GO:0001975	response to amphetamine	24/5894	33/18866	1.15e-06	3.54e-05	2.32e-05	ASIC1/CNR2/DBH/DRD1/DRD2/DRD3/DRD4/DRD5/GRIN1/GRIN2A/HDAC2/HDAC9/OXT/OXTR/PDE1B/PPP3CA/RANBP2/RGS17/RGS4/RGS9/SLC18A2/SOD1/TH/TRDMT1	24
GO:0098801	BP	GO:0098801	regulation of renal system process	25/5894	35/18866	1.19e-06	3.59e-05	2.36e-05	ADIPOQ/ADORA1/AGT/AGTR2/AVP/AVPR1A/AVPR2/COMT/CORIN/DRD2/DRD3/EDN1/F2RL1/GAS6/GJA1/GJA5/GNAI2/INPP5K/NPPB/OR51E2/OXT/PDGFB/PTPRO/SNX5/TAC1	25
GO:0007612	BP	GO:0007612	learning	73/5894	145/18866	1.19e-06	3.59e-05	2.36e-05	AAAS/ACTR2/ADAM2/AGT/ARC/ASIC1/ATXN1/C1QL1/CCK/CHRNB2/CLN3/CNTN2/COMT/CREB1/CRH/DBH/DDHD2/DKK1/DLG4/DRD1/DRD2/DRD3/DRD5/FGF13/FOSL1/FOXB1/FYN/GABRA5/GPR88/GRIN1/GRIN2A/GRM5/HRH2/INSR/JPH3/KALRN/KRAS/LGMN/MAPK8IP2/MECP2/MTOR/NDRG4/NEUROD2/NF1/NLGN3/NLGN4X/NLGN4Y/NPTN/NPTX2/NRGN/NRXN2/NTSR1/OPRL1/PAK6/PDE1B/PPP3CB/PTGS2/RIN1/SHANK1/SLC12A5/SLC24A2/SNAP25/SORCS3/SRF/SYNJ1/SYNPO/SYT11/TAC1/TBR1/TH/TN…	73
GO:0033135	BP	GO:0033135	regulation of peptidyl-serine phosphorylation	73/5894	145/18866	1.19e-06	3.59e-05	2.36e-05	ANGPT1/ARAF/ATP2B4/AVP/BAG4/BCAR3/BCL2/BDNF/CALCR/CAV1/CD44/CREBL2/CSF3/DKK1/DMTN/GADD45A/GAS6/GCG/GSK3A/HAX1/HCLS1/HDAC6/HGF/IFNA1/IFNA10/IFNA14/IFNA16/IFNA17/IFNA2/IFNA4/IFNA5/IFNA7/IFNA8/IFNB1/IFNG/IFNW1/IL6/INPP5J/INPP5K/LATS1/LIF/MAPKAP1/MIF/MLXIPL/NCK1/NGF/NOS1/NSD1/NTF3/OSM/PAQR3/PDE4D/PLCL1/PLCL2/PPM1F/PRKAA1/PRKD1/PRKD2/PTEN/PTGS2/PWP1/RAMP3/RET/SH2D3A/SH2D3C/SNCA/SPRY2/SPTBN4/STK4/TCL1B…	73
GO:0030049	BP	GO:0030049	muscle filament sliding	27/5894	39/18866	1.2e-06	3.59e-05	2.36e-05	ACTA1/ACTN2/MYBPC1/MYBPC2/MYBPC3/MYH2/MYH3/MYH6/MYH7/MYH8/MYL1/MYL2/MYL3/MYL4/TCAP/TNNC1/TNNC2/TNNI1/TNNI2/TNNI3/TNNT1/TNNT2/TNNT3/TPM3/TPM4/TTN/VIM	27
GO:0033275	BP	GO:0033275	actin-myosin filament sliding	27/5894	39/18866	1.2e-06	3.59e-05	2.36e-05	ACTA1/ACTN2/MYBPC1/MYBPC2/MYBPC3/MYH2/MYH3/MYH6/MYH7/MYH8/MYL1/MYL2/MYL3/MYL4/TCAP/TNNC1/TNNC2/TNNI1/TNNI2/TNNI3/TNNT1/TNNT2/TNNT3/TPM3/TPM4/TTN/VIM	27
GO:0070897	BP	GO:0070897	transcription preinitiation complex assembly	26/5894	37/18866	1.21e-06	3.6e-05	2.36e-05	ATF7IP/BAZ2A/BRF1/BRF2/CREB1/DR1/ESR1/GTF2A2/PIH1D1/POLR1E/PSMC3/PSMC4/PSMC5/PSMC6/SMARCA4/SMARCB1/TAF1/TAF12/TAF1B/TAF7/TAF7L/TBP/THRA/TP53/UBTF/WNT10B	26
GO:0072511	BP	GO:0072511	divalent inorganic cation transport	198/5894	478/18866	1.26e-06	3.73e-05	2.45e-05	ABCC2/ABL1/ADCYAP1R1/ADRA1A/ADRA2A/AFG3L2/AGT/ANXA6/APLNR/ASIC1/ATG5/ATP2A1/ATP2A2/ATP2B2/ATP2B3/ATP2B4/ATP2C2/ATP7B/BCL2/BDKRB1/BEST1/BIN1/CACNA1B/CACNA1C/CACNA1D/CACNA1E/CACNA1F/CACNA1G/CACNA1I/CACNA1S/CACNA2D1/CACNA2D3/CACNB1/CACNB3/CACNG1/CACNG2/CACNG3/CACNG4/CACNG5/CALCR/CALCRL/CAMK2A/CAMK2B/CAPN3/CASQ1/CASR/CAV1/CAV3/CCL2/CCL21/CCL5/CD33/CHD7/CHRNA10/CHRNA9/CHRNB2/CLCA1/CLDN16/CLIC2/CNNM2/C…	198
GO:0002526	BP	GO:0002526	acute inflammatory response	59/5894	111/18866	1.28e-06	3.79e-05	2.49e-05	ADCYAP1/ADORA1/APCS/APOA2/ASH1L/ASS1/BTK/C3/CD6/CRP/EPO/F12/F2/F3/F8/FCGR2B/FFAR2/FUT7/GATA3/GSTP1/HFE/HLA-E/HP/HPR/IL1B/IL22/IL4/IL6/IL6R/INS/LBP/MBL2/MYLK3/NLRP3/NPFF/NPY5R/NUPR1/OGG1/OPRM1/ORM1/OSM/PIK3CG/PLA2G2D/PPARG/PRCP/PTGER3/PTGS2/RHBDD3/S100A8/SERPINA3/SERPINC1/SERPINF2/SIGIRR/STAT3/TAC1/TFR2/TNF/TNFSF11/VNN1	59
GO:0033555	BP	GO:0033555	multicellular organismal response to stress	44/5894	76/18866	1.37e-06	4.03e-05	2.64e-05	ADCYAP1/ADCYAP1R1/ADRB1/ASIC1/ASIC4/BCL2/BDNF/BRINP1/CACNA1B/CALCA/CCK/COMT/CRH/DBH/DRD1/DRD4/GABRA5/GCH1/GJA1/GJA4/GRIK2/HTR1A/HTR2C/KIAA0319/MAPK8IP2/MECP2/MORC1/NEUROD2/NOS1/NPY2R/NR2E1/NTRK1/P2RX3/PENK/PPP3CA/PRKCG/PTEN/RET/SLC6A2/TAC1/THBS4/TRPA1/VDAC3/VWA1	44
GO:0043279	BP	GO:0043279	response to alkaloid	56/5894	104/18866	1.37e-06	4.03e-05	2.64e-05	ADCY8/AIF1/ATG7/BCL2L1/CACNA1S/CACNG4/CASP3/CASP6/CHRNB2/CRH/CRHBP/DDC/DHODH/DNM2/DNMT3A/DRD1/DRD2/DRD3/DRD4/DRD5/GRIN1/GSTM2/HDAC2/HTR1B/HTR2A/HTR3A/MBD1/MDM2/MTOR/NPFF/OPRM1/OXT/OXTR/PDX1/PENK/PITX3/PPARG/PPP5C/PRKAA1/PRKCE/PRKCG/PTK2B/RECQL5/RELA/RGS4/RYR3/SLC34A1/SLC6A3/SLC8A1/STAR/TAC1/TACR3/TH/TMED10/UBE3A/UQCRC1	56
GO:0009896	BP	GO:0009896	positive regulation of catabolic process	189/5894	454/18866	1.47e-06	4.3e-05	2.82e-05	AADAC/ABCA2/ABCD1/ABCD2/ADAM9/ADORA1/ADRA2A/ADRB2/AKT2/AMBRA1/ANGPTL3/APC/APC2/APOA2/APOA4/ARIH1/ARIH2/ARNT/ASB9/ATG4B/ATG5/ATG7/ATM/ATXN3/BAD/BAG2/BAG3/BAG6/BARD1/BBS7/BNIP3L/C4BPA/C4BPB/CAV1/CAV3/CBFA2T3/CCDC22/CDKN1B/CEBPA/CHFR/CLEC16A/CNOT7/CPT1A/CSNK1A1/CSNK1D/CSNK1E/DAPK1/DCN/DDA1/DET1/DISC1/DNAJB2/DND1/DXO/EDEM1/EGF/ENDOG/ESRRB/FABP1/FAF1/FBXO22/FOXO1/FZR1/GAPDHS/GGA1/GGA3/GJA1/GPC3/GPD1/G…	189
GO:0060562	BP	GO:0060562	epithelial tube morphogenesis	144/5894	331/18866	1.49e-06	4.33e-05	2.84e-05	ABL1/ADM/AGT/AGTR2/AHI1/ALX1/APAF1/ARHGAP35/ARID1A/BBS4/BBS7/BCL2/BMP2/BMP4/BMP5/BRD2/CASP3/CASR/CAV3/CCDC40/CCL11/CELSR1/CITED1/CSF1/CSF1R/CSNK2B/CTNNB1/DAG1/DCHS1/DLG1/DLG5/DNAAF1/EDN1/EFNB2/EGF/ENG/EPHA4/EPHA7/ESR1/EYA1/FGF1/FGF8/FGFR2/FOXA1/FOXC2/FOXH1/FUZ/FZD3/GATA3/GATA4/GBX2/GDF2/GDNF/GLMN/GNA13/GPC3/GREB1L/GRHL2/HAND1/HAND2/HES1/HESX1/HOXA5/IFT122/IFT57/KDM5B/KDR/KLHL3/KRAS/LAMA1/LBX1/LHX…	144
GO:0046942	BP	GO:0046942	carboxylic acid transport	151/5894	350/18866	1.51e-06	4.37e-05	2.87e-05	ABCB11/ABCB4/ABCC2/ABCC3/ABCD1/ABCD2/ABCD4/ABCG2/ACE/ACSL1/ADORA1/AGT/AGTR2/AGXT/AKR1C4/AKT2/APBA1/ATP8B1/AVP/AVPR1A/AVPR1B/BDNF/CASR/CCK/CD36/CLN3/CPT1A/CYP4A11/CYP4F2/DRD2/DRD3/DRD4/EDN1/FABP1/FABP3/FABP4/FABP5/FOLR3/GJA1/GLS2/GRM2/HRH3/HTR1B/IL1B/IRS2/KCNJ10/LEP/LRP2/LRRC8E/MAP2K6/MID1IP1/MIF/MPC2/NF1/NOS2/NPY5R/NR1H4/NTSR1/OXT/P2RX7/PLA2G2A/PLA2G2D/PLA2G2E/PLA2G2F/PLA2G3/PLA2G4A/PLA2G6/PLA2R1…	151
GO:0007588	BP	GO:0007588	excretion	39/5894	65/18866	1.57e-06	4.49e-05	2.95e-05	ABCG2/ADORA1/ADRA1A/AGT/AGTR2/AMN/AQP6/ATP6V1B1/AVP/AVPR1A/AVPR2/CHRNA3/CHRNB2/CHRNB4/CLCN5/CLCNKB/CLDN16/CLN3/COMT/CORIN/DRD2/DRD3/EDN1/GNAI2/GUCA2B/KCNJ1/NEDD4L/NFAT5/NPHP1/NPHS1/NPHS2/NPPB/OXT/POU3F3/SCNN1G/SLC26A3/SNX5/TAC1/UMOD	39
GO:0070838	BP	GO:0070838	divalent metal ion transport	195/5894	471/18866	1.57e-06	4.49e-05	2.95e-05	ABL1/ADCYAP1R1/ADRA1A/ADRA2A/AFG3L2/AGT/ANXA6/APLNR/ASIC1/ATG5/ATP2A1/ATP2A2/ATP2B2/ATP2B3/ATP2B4/ATP2C2/BCL2/BDKRB1/BEST1/BIN1/CACNA1B/CACNA1C/CACNA1D/CACNA1E/CACNA1F/CACNA1G/CACNA1I/CACNA1S/CACNA2D1/CACNA2D3/CACNB1/CACNB3/CACNG1/CACNG2/CACNG3/CACNG4/CACNG5/CALCR/CALCRL/CAMK2A/CAMK2B/CAPN3/CASQ1/CASR/CAV1/CAV3/CCL2/CCL21/CCL5/CD33/CHD7/CHRNA10/CHRNA9/CHRNB2/CLCA1/CLDN16/CLIC2/CNNM2/CRH/CRHR1/CSN…	195
GO:0046651	BP	GO:0046651	lymphocyte proliferation	126/5894	283/18866	1.58e-06	4.49e-05	2.95e-05	ABL1/AGER/AIF1/ATM/BCL2/BMP4/BST1/BTK/BTN2A2/CASP3/CCL5/CCND3/CCR2/CD151/CD1D/CD209/CD28/CD3E/CD40LG/CD46/CD6/CD70/CD74/CDKN1A/CHRNB2/CRTAM/CTNNB1/DLG1/DLG5/DOCK2/EBI3/EPO/FCGR2B/FKBP1B/FLT3/FLT3LG/FOXJ1/FOXP3/FYN/GAL/GLMN/GNRH1/GPR183/HES1/HHLA2/HLA-DMB/HLA-DPA1/HLA-DPB1/HLA-E/IFNA1/IFNA10/IFNA14/IFNA16/IFNA17/IFNA2/IFNA4/IFNA5/IFNA7/IFNA8/IFNB1/IFNW1/IGFBP2/IKZF3/IL12B/IL12RB1/IL13/IL15/IL1B/IL…	126
GO:0045732	BP	GO:0045732	positive regulation of protein catabolic process	104/5894	225/18866	1.58e-06	4.49e-05	2.95e-05	ABCA2/ADAM9/ADRA2A/APC/APC2/ARIH1/ARIH2/ASB9/ATG4B/ATG7/ATXN3/BAG2/BAG6/BARD1/BBS7/C4BPA/C4BPB/CAV1/CAV3/CBFA2T3/CCDC22/CDKN1B/CEBPA/CHFR/CSNK1A1/CSNK1D/CSNK1E/DDA1/DET1/DISC1/DNAJB2/EDEM1/EGF/FAF1/FBXO22/FOXO1/FZR1/GGA1/GGA3/GJA1/GPC3/GPLD1/GSK3A/HECW1/HUWE1/IDE/IFNG/IL1B/LDLR/LRP1/LRP2/MAPK9/MDM2/MYLIP/NDFIP1/NEDD4/NEDD4L/NFE2L2/NUPR1/OSBPL7/PACSIN3/PLK2/PSEN1/PSMC4/PTEN/PTK2B/PTTG1IP/PYHIN1/RA…	104
GO:0009581	BP	GO:0009581	detection of external stimulus	71/5894	141/18866	1.64e-06	4.65e-05	3.06e-05	ABCA4/ADORA1/AIPL1/ANO3/ATP8A2/BACE1/BEST1/CACNA1F/CACNB3/CALCA/CAMKMT/CAV3/CEP250/CHRNA10/CHRNA9/CNGB1/CRB1/CSRP3/EPHB1/FNTA/FYN/GNA11/GNAT1/GNAT2/GPR52/GPR88/GRIK2/GRK1/GRK4/GRM6/GUCA1B/GUCY2F/HPN/HTR2A/ITGA2/JUP/KCNA1/LXN/METAP1/NGFR/NMT2/NR2E3/NTRK1/NTSR1/PDC/PDE6B/PDE6C/PDE6G/PDZD7/PIEZO2/PITPNM1/PKD2/PKD2L1/PKD2L2/PKDREJ/PLEKHB1/PPEF1/PRDM12/RCVRN/RGR/RHO/RPE65/RRH/SAG/SCN1A/TCAP/TRPA1/TRPC…	71
GO:0000187	BP	GO:0000187	activation of MAPK activity	77/5894	156/18866	1.66e-06	4.66e-05	3.06e-05	ADRA2B/AGT/AVPI1/BIRC7/BMP2/C5/CD40LG/CD74/CRKL/CSPG4/DRD4/DUSP7/EGF/ERCC6/ERN1/ERN2/ERP29/FGF1/FRS2/GDF15/GHR/GNG3/GRM1/GRM4/HGF/IGFBP6/IL1B/INSR/ITGA1/LPAR3/MADD/MAP2K5/MAP2K6/MAP2K7/MAP3K10/MAP3K12/MAP3K13/MAP3K2/MAP3K5/MAP3K6/MAP3K7/MAP4K5/MAPK1/MAPK10/MAPK11/MAPK8IP3/NOD1/NTF3/P2RX7/PAK3/PDE6G/PDE6H/PIK3CB/PKN1/PLCE1/PRDX2/PRKAA1/PTPN1/PTPN11/RET/RPS27A/S1PR2/SHC2/SOD1/SPAG9/SYK/TAB1/TAOK1/T…	77
GO:0048592	BP	GO:0048592	eye morphogenesis	77/5894	156/18866	1.66e-06	4.66e-05	3.06e-05	AGTPBP1/AHI1/ARID1A/ATF4/ATP8A2/BBS4/BCAR3/BCL2/BDNF/BMP4/CDON/CNTF/COL8A1/COL8A2/CRB1/CRYGB/CTNNB1/DIO3/DSCAM/EFEMP1/EPHB1/FASLG/FOXE3/FOXF2/FRS2/FSCN2/FZD5/GDF11/GNAT1/GNAT2/HMGN1/IFT122/JAG1/LHX1/LRP6/MAN2A1/MFAP5/MFN2/NAGLU/NF1/NIPBL/NR2E3/NRL/OBSL1/PAX2/PAX6/PDE6C/PITX3/PROX1/PTPRM/RBP4/RING1/RORB/RPE65/RPGRIP1/SDK2/SHROOM2/SIX3/SKI/SOX1/SOX9/SP3/STAT3/TBX2/TDRD7/TENM3/TFAP2A/TH/TOPORS/TRPM1…	77
GO:0046328	BP	GO:0046328	regulation of JNK cascade	88/5894	184/18866	1.73e-06	4.82e-05	3.16e-05	AGER/AIDA/AMBP/ANKRD6/ARHGEF5/BIRC7/CCL21/CD40LG/CDC42/CYLD/DKK1/EDA2R/EDAR/EDN1/EPHA4/EPHB1/ERCC6/ERN1/ERN2/F2RL1/FCGR2B/FGD2/FKTN/FLT4/FZD10/FZD5/FZD7/GADD45A/GPS2/GRIK2/GSTP1/HDAC3/HIPK3/HRAS/IL1B/LTBR/MAP2K7/MAP3K10/MAP3K12/MAP3K13/MAP3K2/MAP3K5/MAP3K6/MAP3K7/MAP4K4/MAP4K5/MAPK8IP2/MAPK8IP3/MINK1/MMP8/NCF1/NOD1/NOX1/NPPA/PAFAH1B1/PHLPP1/PKN1/PLCB1/PPEF2/PTK2B/PTPN1/PTPN22/PYCARD/RAPGEF1/RB1CC…	88
GO:0046661	BP	GO:0046661	male sex differentiation	80/5894	164/18866	1.9e-06	5.3e-05	3.48e-05	ADAM15/ADAM20/ADAM21/AMHR2/ARID4B/ASB1/ATRX/BCL2/BCL2L1/BMP5/BMP6/BMPR1A/CBL/CCND1/CRKL/CTNNB1/CTSV/DMRT1/ERCC1/ESR1/FGF8/FGF9/FKBP4/FLNA/FNDC3A/FSHB/FSHR/GATA1/GATA3/GATA4/GREB1L/HMGCS1/HSD17B3/ING2/INHA/INSR/KDM5A/KITLG/LHCGR/LRP2/LRRC6/MAMLD1/NKX2-1/NR0B1/NR5A1/NTRK1/NUPR1/PLEKHA1/PRKACG/RAB13/RAD21L1/RARA/REN/RHOBTB3/ROR2/SDC1/SEMA3A/SF1/SGPL1/SHH/SMAD4/SMAD5/SOX15/SOX9/SRD5A2/SRY/STAR/STAT5B…	80
GO:0048738	BP	GO:0048738	cardiac muscle tissue development	106/5894	231/18866	1.92e-06	5.31e-05	3.49e-05	ACTN2/ADAMTS9/ADRA1A/AGT/AGTR2/ALDH1A2/ALPK3/ANKRD1/ARID1A/ATG5/BMP10/BMP2/BMP4/BMP5/BMPR1A/CAV3/CBY1/CDC42/CHD7/CREB1/CSRP3/CTDP1/CXADR/DKK1/DSP/EDN1/EFNB2/EGLN1/ENG/ERBB4/FGF20/FGF3/FGF8/FGF9/FGFR1/FGFR2/FHOD3/FOXC1/FOXC2/FOXH1/FRS2/FZD7/GATA4/GJA1/GJA5/GSK3A/HAND1/HEG1/HEY2/ID2/ISL1/JARID2/KCNK2/KDM6B/LRP2/MAML1/MAPK1/MAPK11/MTOR/MYBPC3/MYH6/MYH7/MYL2/MYL3/MYLK3/NDRG4/NKX2-5/NOTCH1/NPPA/NRAP/O…	106
GO:0055067	BP	GO:0055067	monovalent inorganic cation homeostasis	78/5894	159/18866	1.93e-06	5.31e-05	3.49e-05	ADORA1/AGT/AGTR2/ATP12A/ATP1A1/ATP6AP1/ATP6AP2/ATP6V0A1/ATP6V0A2/ATP6V0D1/ATP6V0E2/ATP6V1A/ATP6V1B1/ATP6V1B2/ATP6V1E1/ATP6V1G1/ATP6V1H/AVP/AVPR1A/AVPR2/BCL2/CA2/CA7/CLN3/CLN5/CLN6/COMT/CORIN/CYP11B2/CYP4A11/CYP4F2/DRD2/DRD3/EDN1/FASLG/GNAI2/KCNJ10/KCNJ2/MAFG/MAPK1/MC3R/NEDD4L/NOX1/NPPB/OTC/OXT/RAB38/RAB7A/SCNN1G/SLC12A1/SLC12A2/SLC12A3/SLC12A4/SLC12A5/SLC26A3/SLC26A4/SLC4A1/SLC4A10/SLC4A3/SLC4A5/…	78
GO:0022407	BP	GO:0022407	regulation of cell-cell adhesion	183/5894	439/18866	1.94e-06	5.31e-05	3.49e-05	ABL1/ADAM19/ADIPOQ/ADTRP/AGER/AIF1/ALOX15/ALOX5/AP3D1/ASS1/BAD/BMP2/BMP4/BMP6/BTN2A2/C1QTNF1/CASP3/CAV1/CCL2/CCL21/CCL25/CCL5/CCR2/CD160/CD1D/CD209/CD28/CD3E/CD40LG/CD44/CD46/CD47/CD6/CD70/CD74/CD9/CDC42/CDH1/CDSN/CELSR2/CRTAM/CX3CL1/CYLD/DLG1/DLG5/DMTN/EBI3/EFNB2/EFNB3/EPB41L5/EPHA7/EPHB3/EPO/ETS1/FCGR2B/FGB/FGL1/FLOT2/FOXA1/FOXJ1/FOXP3/FUT4/FUT7/FXYD5/FYN/GATA3/GCNT2/GLMN/GNRH1/GRAP2/GRB2/HES1/…	183
GO:0009582	BP	GO:0009582	detection of abiotic stimulus	72/5894	144/18866	1.95e-06	5.31e-05	3.49e-05	ABCA4/ADORA1/AIPL1/ANO3/ATP8A2/BACE1/BEST1/CACNA1F/CACNB3/CALCA/CAMKMT/CAV3/CEP250/CHRNA10/CHRNA9/CNGB1/CRB1/CSRP3/EPHB1/FNTA/FYN/GNA11/GNAT1/GNAT2/GPR52/GPR88/GRIK2/GRK1/GRK4/GRM6/GUCA1B/GUCY2F/HPN/HTR2A/ITGA2/JUP/KCNA1/LXN/METAP1/NGFR/NMT2/NR2E3/NTRK1/NTSR1/PDC/PDE6B/PDE6C/PDE6G/PDZD7/PIEZO2/PITPNM1/PKD2/PKD2L1/PKD2L2/PKDREJ/PLEKHB1/PPEF1/PRDM12/RCVRN/RGR/RHO/RPE65/RRH/SAG/SCN1A/TAC1/TCAP/TRPA1…	72
GO:0031098	BP	GO:0031098	stress-activated protein kinase signaling cascade	132/5894	300/18866	1.95e-06	5.31e-05	3.49e-05	AGER/AGT/AIDA/AMBP/ANKRD6/ARHGEF5/BIRC7/BMP2/CASR/CAV3/CCL21/CD40LG/CDC42/CHUK/CRKL/CYLD/DKK1/DLG1/EDA2R/EDAR/EDN1/EMC10/EPHA4/EPHB1/ERCC6/ERN1/ERN2/F2RL1/FCGR2B/FGD2/FKTN/FLT4/FOXO1/FZD10/FZD5/FZD7/GADD45A/GPS1/GPS2/GRIK2/GSTP1/HAND2/HDAC3/HGF/HIPK3/HRAS/IKBKB/IL1B/IL26/KAT7/LEP/LGALS9/LTBR/MAP2K7/MAP3K10/MAP3K12/MAP3K13/MAP3K2/MAP3K5/MAP3K6/MAP3K7/MAP3K8/MAP4K3/MAP4K4/MAP4K5/MAPK1/MAPK10/MAPK11…	132
GO:0043270	BP	GO:0043270	positive regulation of ion transport	126/5894	284/18866	1.97e-06	5.35e-05	3.51e-05	ABCA7/ABCB11/ABCB4/ABL1/ACTN2/ACTN4/ADCYAP1R1/ADORA1/ADRA2A/ADRB2/AGT/APLNR/ARC/ATF4/ATP2A1/ATP2C2/ATP8A2/AVP/AVPR1A/AVPR1B/BDKRB1/CACNA1D/CACNA2D1/CACNB3/CACNG2/CACNG3/CACNG4/CALCR/CAMK2A/CAPN3/CASQ1/CASR/CAV1/CCK/CCL2/CCL5/CCR2/CETP/CHRNB2/CNTN1/CRH/CX3CL1/CYP4A11/CYP4F2/DLG1/DNM2/DRD1/DRD2/DRD4/EDN1/F2/F2RL3/FABP3/FGF12/FLNA/GAL/GALR2/GCG/GDNF/GRIN1/GRM6/GSTM2/HAP1/HTR3A/IFNG/IL13/IL1B/KCNA1/K…	126
GO:0048545	BP	GO:0048545	response to steroid hormone	149/5894	346/18866	2e-06	5.41e-05	3.55e-05	AANAT/ABCA2/ABCA3/ABCC2/ABHD2/ACR/ACSBG1/ACTA1/ADAM9/ADCYAP1/ADIPOQ/ADM/ADTRP/AGL/AGTR2/AGXT/AIF1/ALPL/APOA2/ARID1A/ARNTL/ASS1/ATP1A1/AVPR1A/BAD/BCL2/BMP4/BMP6/CA2/CALCR/CASP3/CATSPERB/CATSPERG/CAV1/CCND1/CDKN1A/CNOT2/CPN1/CPS1/CRH/CSN1S1/CTSV/CYP7B1/DDX17/EDN1/EIF4EBP1/ENG/EP300/EPO/ESR1/ESR2/ESRRA/ESRRB/FECH/FKBP4/FLT3/FOSL1/FOXA1/FOXH1/FOXO1/GABRB1/GHRHR/GHSR/GNRH1/GSTP1/HDAC6/HEYL/HSD11B2/HSD…	149
GO:0019216	BP	GO:0019216	regulation of lipid metabolic process	180/5894	431/18866	2.04e-06	5.48e-05	3.6e-05	AADAC/ABCA2/ABCB11/ABCB4/ABCD1/ABCD2/ABHD6/ACADL/ACSL1/ADIPOQ/ADM/ADORA1/ADRA2A/AGAP2/AGT/AKT2/AMBRA1/ANGPTL3/ANGPTL4/ANKRD1/APOA2/APOA4/APOBEC1/APOC3/APPL2/ASXL3/ATG14/ATP1A1/AVP/AVPR1A/BBS4/BMP2/BMP5/BMP6/C3/CAV1/CCL21/CD36/CD74/CDC42/CGA/CHD9/CHRM5/CISH/CPT1A/CREB1/CREBBP/CREBL2/CRTC3/CTDNEP1/CYP4A11/CYP7A1/DGKQ/DKKL1/DNAJC15/DRD3/EEF1A2/EIF6/ERLIN2/F2/FABP1/FABP3/FABP5/FASN/FDFT1/FGF1/FGFR3/F…	180
GO:0007631	BP	GO:0007631	feeding behavior	56/5894	105/18866	2.05e-06	5.48e-05	3.6e-05	ADM2/AGRP/AGT/ASIP/ATP8A2/BDNF/BRS3/CALCA/CARTPT/CCK/CHRNB2/CNTFR/CPT1A/DACH1/DERL2/DRD1/DRD2/FYN/GAL/GALR2/GCG/GDF15/GHSR/GRIN1/HAND2/HCRTR1/HCRTR2/HTR1B/HTR2C/IAPP/INS/INSL5/LEP/MC3R/MC4R/MCHR1/MMP17/MTOR/NPY2R/NPY5R/OPRL1/OPRM1/OXT/OXTR/P2RY1/PPY/PRLH/PYY/REN/RETN/STAT3/TACR3/TBR1/TCF15/TH/TRH	56
GO:1901653	BP	GO:1901653	cellular response to peptide	168/5894	398/18866	2.05e-06	5.48e-05	3.6e-05	ACTN2/ADCY1/ADCY2/ADCY7/ADCY8/ADCY9/ADIPOQ/ADRB2/AGER/AGT/AGTR2/AKT2/APC/APOBEC1/APPL2/APRT/ARHGEF2/ASS1/ATP6AP1/ATP6V0A1/ATP6V0A2/ATP6V0D1/ATP6V0E2/ATP6V1A/ATP6V1B1/ATP6V1B2/ATP6V1E1/ATP6V1G1/ATP6V1H/BACE1/BCAR3/C2CD5/CA2/CACNA2D1/CACNB1/CAMK2A/CASP4/CASR/CAV1/CCND3/CD36/CDC5L/CPS1/CREB1/CRHBP/CRHR1/CRHR2/CRK/CSH1/CSRP3/CYP11B1/CYP11B2/EDN1/EIF4EBP1/EPHA4/ESRRA/FCGR2B/FOXC2/FOXO1/FOXO4/FUT7/FYN/…	168
GO:0030098	BP	GO:0030098	lymphocyte differentiation	157/5894	368/18866	2.09e-06	5.56e-05	3.65e-05	ABL1/AIRE/AP3D1/ATG5/ATM/BAD/BATF/BCL2/BMP4/BTK/BTN2A2/CAMK4/CCR2/CCR6/CCR9/CD1D/CD2/CD28/CD3D/CD3E/CD3G/CD40LG/CD46/CD74/CDH17/CEBPG/CHD7/CLPTM1/CR1/CRTAM/CTNNB1/CYLD/CYP26B1/DCLRE1C/DNAJB9/DOCK10/DOCK2/EP300/FCGR2B/FLT3/FLT3LG/FOXJ1/FOXP3/FUT7/FZD5/FZD7/FZD9/GAS6/GATA3/GPR183/GPS2/HDAC4/HDAC9/HHEX/HLA-DOA/ID2/IFNA1/IFNA10/IFNA14/IFNA16/IFNA17/IFNA2/IFNA4/IFNA5/IFNA7/IFNA8/IFNB1/IFNG/IFNW1/IKZF3…	157
GO:0015698	BP	GO:0015698	inorganic anion transport	83/5894	172/18866	2.14e-06	5.67e-05	3.72e-05	ANKH/ANO2/ANO3/AQP6/ATF4/BEST1/BEST2/CA2/CA7/CASR/CCT8L2/CLCA1/CLCA2/CLCC1/CLCN1/CLCN4/CLCN5/CLCN6/CLCNKB/CLIC1/CLIC2/FGFR1/FXYD3/GABRA1/GABRA2/GABRA3/GABRA4/GABRA5/GABRB1/GABRB2/GABRB3/GABRD/GABRG2/GABRG3/GABRQ/GABRR2/GLRA1/GLRA2/GLRA3/GLRB/GRM5/IP6K2/LRRC8B/LRRC8E/MTOR/P2RY4/PRKG2/PTAFR/ROS1/SLC12A1/SLC12A2/SLC12A3/SLC12A4/SLC12A5/SLC13A1/SLC17A1/SLC17A3/SLC17A7/SLC1A1/SLC1A3/SLC20A2/SLC22A11/S…	83
GO:0002064	BP	GO:0002064	epithelial cell development	102/5894	221/18866	2.16e-06	5.68e-05	3.73e-05	ADIPOQ/ARID4B/ARNTL/ATF4/ATRX/BAD/BFSP1/BFSP2/BMP4/BMP5/BMP6/CDH5/CDKN1A/CDSN/CLDN3/COL15A1/CRYGB/CTNNB1/DMRT1/DNASE1L2/ENG/EPB41L5/ESR1/F2RL1/FASN/FEM1B/FGFR1/FLNA/FNDC3A/FOXA1/FOXC2/FOXJ1/FRS2/GPX1/GRHL2/GSK3A/GSTM3/HAPLN2/HEG1/HOXA5/HOXB13/HRH2/ID1/IFT74/IKBKB/IL1B/INSM1/IQGAP1/JAG1/KRT2/MAGI2/MYO1E/NKX2-2/NKX3-2/NOTCH1/NOTCH4/NPHS1/NPHS2/NTRK1/ONECUT1/PAFAH1B1/PAX6/PDE4D/PDGFB/PDZD7/PECAM1/PG…	102
GO:0071867	BP	GO:0071867	response to monoamine	58/5894	110/18866	2.21e-06	5.77e-05	3.79e-05	ABL1/ADIPOQ/APLP1/ATF4/ATP2B4/CALY/CHRM2/CHRM3/CHRM4/CHRM5/DNM2/DRD1/DRD2/DRD3/DRD4/DRD5/FLNA/GABPA/GNA11/GNAL/GNAS/GSK3A/HDAC2/HRH2/HRH3/HRH4/HTR1A/HTR1B/HTR1D/HTR1E/HTR1F/HTR2A/HTR2B/HTR2C/HTR3A/HTR4/HTR5A/HTR6/HTR7/ID1/MAPK1/OPRM1/OR10H1/OR10H2/OR10H3/PDE4B/PDE4D/PENK/PKLR/PRKACA/PTGER1/RGS4/RGS9/RNLS/SIRT2/SNCA/STAR/VPS35	58
GO:0071869	BP	GO:0071869	response to catecholamine	58/5894	110/18866	2.21e-06	5.77e-05	3.79e-05	ABL1/ADIPOQ/APLP1/ATF4/ATP2B4/CALY/CHRM2/CHRM3/CHRM4/CHRM5/DNM2/DRD1/DRD2/DRD3/DRD4/DRD5/FLNA/GABPA/GNA11/GNAL/GNAS/GSK3A/HDAC2/HRH2/HRH3/HRH4/HTR1A/HTR1B/HTR1D/HTR1E/HTR1F/HTR2A/HTR2B/HTR2C/HTR3A/HTR4/HTR5A/HTR6/HTR7/ID1/MAPK1/OPRM1/OR10H1/OR10H2/OR10H3/PDE4B/PDE4D/PENK/PKLR/PRKACA/PTGER1/RGS4/RGS9/RNLS/SIRT2/SNCA/STAR/VPS35	58
GO:0044060	BP	GO:0044060	regulation of endocrine process	29/5894	44/18866	2.32e-06	6.03e-05	3.96e-05	AGT/AGTR2/BMP6/C1QTNF1/C1QTNF3/CRH/CRHBP/CRHR1/F2RL1/FGFR1/GAL/GALR1/GDF9/GJA1/GJA5/GNAS/IL1B/INHA/KISS1/LEP/NPVF/OR51E2/POMC/PTPN11/RAB11FIP5/REN/RETN/SMAD4/TAC1	29
GO:0006066	BP	GO:0006066	alcohol metabolic process	163/5894	385/18866	2.34e-06	6.06e-05	3.98e-05	ABCA2/ACADL/ACAT2/ACO2/ADCYAP1R1/ADH1A/ADH1C/ADH5/AKR1B10/AKR1C4/AKR1D1/ALDH1A1/ALDH1A2/ALDH1B1/ANGPTL3/APOA2/APOA4/APOF/AVPR1B/BMP2/BMP5/BMP6/BPNT1/CEBPA/CEL/CETP/CHKA/CLN6/COQ2/COQ3/CUBN/CYB5R3/CYP11B1/CYP11B2/CYP1A2/CYP1B1/CYP27A1/CYP2R1/CYP39A1/CYP46A1/CYP7A1/CYP7B1/DBH/DGKQ/DPAGT1/DYSF/EBP/ERLIN2/FASN/FDFT1/FDX1/FDXR/FGF1/FGFR1/GALR2/GCH1/GDE1/GFI1/GGPS1/GK/GK2/GNB3/GPD1/GPD2/H6PD/HAO1/HDLBP…	163
GO:0031623	BP	GO:0031623	receptor internalization	60/5894	115/18866	2.35e-06	6.06e-05	3.98e-05	ACHE/ADM/AHI1/ANGPT1/ARC/ARR3/ATXN2/CACNG2/CACNG3/CACNG4/CACNG5/CALCRL/CALY/CAV1/CAV3/CD36/CD63/CD9/CNTN2/CXCR1/DKK1/DLG4/DNM2/DNM3/DRD2/DRD3/DRD4/EFNB2/EGF/GRB2/GRIA1/GRK4/HPCA/HTR1B/HTR2B/INSR/ITGB3/LRP1/LRPAP1/LRRTM2/MAGI2/MKLN1/NECAB2/NEDD4/NTF3/OPHN1/PICALM/PICK1/RAMP1/RAMP3/SAG/SCRIB/SCYL2/SDCBP/SELE/SNAP25/SNCA/SNX1/SYK/UBQLN2	60
GO:0060079	BP	GO:0060079	excitatory postsynaptic potential	55/5894	103/18866	2.4e-06	6.17e-05	4.05e-05	ADORA1/ADRB2/CACNB3/CBLN1/CHRNA1/CHRNA10/CHRNA2/CHRNA3/CHRNA6/CHRNA9/CHRNB1/CHRNB2/CHRNB3/CHRNB4/CHRND/CHRNE/CHRNG/CUX2/DLG4/DRD2/GLRA1/GLRA2/GLRA3/GLRB/GRIK2/GRIK5/GRIN1/GRIN2A/GRIN2B/GRIN2C/GRIN2D/GSK3A/MAPK8IP2/MECP2/MPP2/NLGN3/NLGN4X/NPFF/NPY2R/OPRM1/P2RX3/P2RX6/P2RX7/PPP3CA/PRKCZ/PTEN/PTK2B/RAB3GAP1/RGS4/S1PR2/SHANK1/SLC17A7/SLC29A1/WNT7A/ZMYND8	55
GO:0048593	BP	GO:0048593	camera-type eye morphogenesis	64/5894	125/18866	2.55e-06	6.53e-05	4.29e-05	AHI1/ARID1A/ATF4/ATP8A2/BBS4/BCAR3/BMP4/CDON/COL8A1/COL8A2/CRB1/CRYGB/CTNNB1/DIO3/DSCAM/EPHB1/FOXE3/FOXF2/FRS2/FZD5/GDF11/GNAT2/HMGN1/IFT122/JAG1/LHX1/LRP6/MAN2A1/MFN2/NAGLU/NF1/NRL/OBSL1/PAX2/PAX6/PDE6C/PITX3/PROX1/PTPRM/RBP4/RING1/RORB/RPE65/RPGRIP1/SDK2/SHROOM2/SIX3/SKI/SOX1/SOX9/SP3/TBX2/TDRD7/TENM3/TFAP2A/TH/TOPORS/TRPM1/TSKU/USH1C/VSX1/WNT16/WNT2B/WNT5A	64
GO:0140353	BP	GO:0140353	lipid export from cell	27/5894	40/18866	2.58e-06	6.59e-05	4.33e-05	AGT/AGTR2/BMP6/C1QTNF1/CRH/CRHR1/CYP19A1/EDN1/GAL/GALR1/GDF9/IL1B/KDM5B/LEP/MAP2K6/MIF/MYB/NOS2/OXT/P2RX7/POMC/PTPN11/REN/RETN/TAC1/TMF1/TNFSF11	27
GO:0044282	BP	GO:0044282	small molecule catabolic process	187/5894	452/18866	2.69e-06	6.85e-05	4.5e-05	AASS/ABCB11/ABCD1/ABCD2/ABCD4/ABHD2/ABHD3/ACAD10/ACADL/ACADS/ACAT2/ACOT8/ACOXL/ADH5/ADIPOQ/ADPRM/ADTRP/AGXT/AHCY/AKR1B10/AKR1D1/AKT2/ALDH1A1/ALDH1B1/ALDH1L1/ALDH5A1/ALDH8A1/ALDOA/ALDOC/APOBEC1/APOBEC3C/APOBEC3F/ASRGL1/ATP2B4/AUH/BAD/BCAT2/BCKDK/BDH1/BPGM/BPNT1/CD44/CEL/CPT1A/CRABP1/CTH/CYP26B1/CYP27A1/CYP2W1/CYP39A1/CYP46A1/CYP4A11/CYP4F2/CYP4F3/CYP7A1/DAO/DBT/DCXR/DECR2/DERA/DLD/DLST/DPYS/ECH1/E…	187
GO:0098810	BP	GO:0098810	neurotransmitter reuptake	23/5894	32/18866	2.71e-06	6.85e-05	4.5e-05	DRD1/DRD2/DRD3/DRD4/GDNF/ITGB3/KCNJ10/NOS1/RAB3B/SLC18A1/SLC18A2/SLC1A2/SLC1A7/SLC22A1/SLC22A2/SLC22A3/SLC29A1/SLC29A2/SLC6A11/SLC6A2/SLC6A3/SNCA/TOR1A	23
GO:0015849	BP	GO:0015849	organic acid transport	151/5894	353/18866	2.72e-06	6.85e-05	4.5e-05	ABCB11/ABCB4/ABCC2/ABCC3/ABCD1/ABCD2/ABCD4/ABCG2/ACE/ACSL1/ADORA1/AGT/AGTR2/AGXT/AKR1C4/AKT2/APBA1/ATP8B1/AVP/AVPR1A/AVPR1B/BDNF/CASR/CCK/CD36/CLN3/CPT1A/CYP4A11/CYP4F2/DRD2/DRD3/DRD4/EDN1/FABP1/FABP3/FABP4/FABP5/FOLR3/GJA1/GLS2/GRM2/HRH3/HTR1B/IL1B/IRS2/KCNJ10/LEP/LRP2/LRRC8E/MAP2K6/MID1IP1/MIF/MPC2/NF1/NOS2/NPY5R/NR1H4/NTSR1/OXT/P2RX7/PLA2G2A/PLA2G2D/PLA2G2E/PLA2G2F/PLA2G3/PLA2G4A/PLA2G6/PLA2R1…	151
GO:0006099	BP	GO:0006099	tricarboxylic acid cycle	24/5894	34/18866	2.75e-06	6.91e-05	4.54e-05	ACO1/ACO2/DLAT/DLD/DLST/FH/IDH1/IDH2/IDH3A/IDH3B/IDH3G/IREB2/MDH1/MDH2/ME2/ME3/NNT/OGDH/OGDHL/PDHA1/PDHA2/SDHA/SDHB/SDHC	24
GO:0001819	BP	GO:0001819	positive regulation of cytokine production	185/5894	447/18866	2.96e-06	7.4e-05	4.86e-05	ADCYAP1/ADIPOQ/ADRA2A/AGER/AGPAT1/AGT/AGTR2/AIF1/ANKRD17/APOA2/ARFGEF2/ARHGEF2/ARNT/ATF2/ATF4/ATP6AP2/BIRC3/C1QBP/C1QTNF3/C3/C5/CARD8/CASP1/CASP8/CCL1/CCR2/CD160/CD2/CD200/CD226/CD28/CD36/CD3E/CD40LG/CD46/CD58/CD6/CD74/CEBPG/CHUK/CLEC7A/CREB1/CREBBP/CRLF2/CRTAM/CSF2/CTNNB1/CX3CL1/CYP1B1/DDX1/DDX3X/DDX41/DHX58/DRD2/EBI3/EIF2AK3/EP300/EPX/F2RL1/F3/FFAR2/FGR/FLT4/FOXP3/FZD5/GAPDH/GATA3/GATA4/GDF2/GL…	185
GO:0071868	BP	GO:0071868	cellular response to monoamine stimulus	56/5894	106/18866	3.03e-06	7.53e-05	4.94e-05	ABL1/ADIPOQ/APLP1/ATF4/ATP2B4/CALY/CHRM2/CHRM3/CHRM4/CHRM5/DNM2/DRD1/DRD2/DRD3/DRD4/DRD5/FLNA/GABPA/GNA11/GNAL/GNAS/GSK3A/HDAC2/HRH2/HRH3/HRH4/HTR1A/HTR1B/HTR1D/HTR1E/HTR1F/HTR2A/HTR2B/HTR2C/HTR3A/HTR4/HTR5A/HTR6/HTR7/ID1/MAPK1/OPRM1/OR10H1/OR10H2/OR10H3/PDE4B/PDE4D/PKLR/PRKACA/PTGER1/RGS4/RGS9/SIRT2/SNCA/STAR/VPS35	56
GO:0071870	BP	GO:0071870	cellular response to catecholamine stimulus	56/5894	106/18866	3.03e-06	7.53e-05	4.94e-05	ABL1/ADIPOQ/APLP1/ATF4/ATP2B4/CALY/CHRM2/CHRM3/CHRM4/CHRM5/DNM2/DRD1/DRD2/DRD3/DRD4/DRD5/FLNA/GABPA/GNA11/GNAL/GNAS/GSK3A/HDAC2/HRH2/HRH3/HRH4/HTR1A/HTR1B/HTR1D/HTR1E/HTR1F/HTR2A/HTR2B/HTR2C/HTR3A/HTR4/HTR5A/HTR6/HTR7/ID1/MAPK1/OPRM1/OR10H1/OR10H2/OR10H3/PDE4B/PDE4D/PKLR/PRKACA/PTGER1/RGS4/RGS9/SIRT2/SNCA/STAR/VPS35	56
GO:0051403	BP	GO:0051403	stress-activated MAPK cascade	126/5894	286/18866	3.05e-06	7.55e-05	4.96e-05	AGER/AGT/AIDA/AMBP/ANKRD6/ARHGEF5/BIRC7/BMP2/CASR/CAV3/CCL21/CD40LG/CDC42/CHUK/CRKL/CYLD/DKK1/DLG1/EDA2R/EDAR/EDN1/EMC10/EPHA4/EPHB1/ERCC6/ERN1/ERN2/F2RL1/FCGR2B/FGD2/FKTN/FLT4/FOXO1/FZD10/FZD5/FZD7/GADD45A/GPS1/GPS2/GRIK2/GSTP1/HAND2/HDAC3/HGF/HIPK3/HRAS/IKBKB/IL1B/IL26/LEP/LGALS9/LTBR/MAP2K7/MAP3K10/MAP3K12/MAP3K13/MAP3K2/MAP3K5/MAP3K6/MAP3K7/MAP3K8/MAP4K3/MAP4K4/MAP4K5/MAPK1/MAPK10/MAPK11/MAPK…	126
GO:0031644	BP	GO:0031644	regulation of nervous system process	73/5894	148/18866	3.16e-06	7.77e-05	5.11e-05	ADORA1/ADRA2C/ADRB2/AGT/AVP/AVPR1A/BEGAIN/CACNB3/CACNG4/CACNG5/CARTPT/CBLN1/CCK/CHRNB4/COMT/CST7/CUX2/DAG1/DICER1/DLG4/DLGAP1/DLGAP2/DLGAP4/EDN1/EIF2AK3/FABP5/FGF12/GHSR/GLRA1/GRIN1/GRIN2D/GRM1/HGF/HTR2C/IGSF9B/ITGA2/MAG/MTNR1B/MTOR/NLGN3/NLGN4X/NOS3/NPFF/NPTX1/NPTX2/NPTXR/NPY2R/NTSR1/OPRL1/OPRM1/OXT/P2RX3/PRKCZ/PTAFR/PTEN/PTK2B/RGS4/ROCK2/S1PR2/SCN11A/SHANK1/SLC25A12/SMR3A/SMR3B/SRC/TENM4/TNFRSF…	73
GO:0061387	BP	GO:0061387	regulation of extent of cell growth	58/5894	111/18866	3.23e-06	7.92e-05	5.2e-05	ABL1/ADNP/ANAPC2/ARHGAP4/BDNF/BMPR2/CDH4/CDK5R1/CDKL3/CDKL5/DBN1/DCC/DISC1/DNM2/DPYSL2/DSCAM/EPHA7/FGF13/FSTL4/IFRD1/IST1/KIAA0319/L1CAM/LPAR3/LRP1/MAG/MAP2/MAP3K13/MEGF8/MT3/NDEL1/NGF/NTN1/OLFM1/PAFAH1B1/POU4F2/PTPRS/RAB21/RND2/RNF6/RTN4/SEMA3A/SEMA3B/SEMA3D/SEMA4A/SEMA4G/SEMA6A/SEMA6B/SEMA6C/SEMA6D/SEMA7A/SRF/TNR/TRIM46/TRPC5/TWF2/ULK2/WNT5A	58
GO:0090277	BP	GO:0090277	positive regulation of peptide hormone secretion	53/5894	99/18866	3.28e-06	8.03e-05	5.27e-05	AACS/ADCY8/ADCYAP1/AIMP1/BAD/BAIAP3/CASR/CRH/DOC2B/DRD2/FGB/GCG/GCK/GHRH/GHRHR/GIP/GIPR/GJA1/GLUD1/GPLD1/GPR27/GPR68/HFE/INS/IRS2/ISL1/KIF5B/KISS1/LRP1/MPC2/NADK/NNAT/NR1H4/PDX1/PLA2G6/PPARD/PPP3CB/PRKCE/PSMD9/RAC1/RBP4/RPH3AL/SCT/STX4/SYBU/TARDBP/TCF7L2/TFR2/TM7SF3/TNFSF11/TRH/TRPM4/VSNL1	53
GO:0062012	BP	GO:0062012	regulation of small molecule metabolic process	188/5894	456/18866	3.3e-06	8.05e-05	5.29e-05	AAAS/ABCB11/ABCD1/ABCD2/ACADL/ADCYAP1R1/ADIPOQ/ADM/AKT2/APOA4/APOC3/APPL2/ARNT/ARPP19/ATP2B4/AVP/AVPR1A/AVPR1B/BAD/BMP2/BMP5/BMP6/C1QTNF1/C1QTNF3/CAV1/CBFA2T3/CD74/CLN3/COMT/COQ3/COX11/CPT1A/CYP7A1/DGKQ/DKKL1/DYRK2/EGF/EIF6/EP300/ERLIN2/ESRRB/FABP1/FABP3/FABP5/FASN/FDFT1/FGF1/FGFR4/FOXO1/GAPDHS/GCG/GCGR/GCK/GFI1/GGPS1/GHSR/GIP/GNB3/GNMT/GPD1/GPLD1/GPT/GSK3A/GSTZ1/GUCA1B/GUCA2B/H6PD/HDAC4/HMGCS1/H…	188
GO:0030100	BP	GO:0030100	regulation of endocytosis	97/5894	210/18866	3.62e-06	8.73e-05	5.73e-05	ABCA2/ABCA7/ABL1/ACTN4/AHI1/ALOX15/ANGPT1/ANKFY1/AP2S1/APOC3/APPL2/ARC/ATXN2/BIN1/BMP2K/C3/CALY/CAV1/CAV3/CBL/CCL21/CD151/CD177/CD36/CD63/CDC42/CLN3/DGKQ/DKK1/DLG4/DNAJC6/DNM1L/DNM2/DRD2/DRD3/DRD4/EFNB2/EGF/EHD4/F2RL1/GPC3/HFE/HIP1R/HPCA/IL4/INSR/ITGA2/ITGB3/LRP1/LRPAP1/LRRTM2/MAGI2/MCTP1/MKLN1/NCKAP1L/NECAB2/NEDD4L/NR1H2/NTF3/OPHN1/PACSIN2/PACSIN3/PICALM/PICK1/PIK3CB/PPARG/PPP3CA/PPP3CB/PRKD1/PT…	97
GO:0006694	BP	GO:0006694	steroid biosynthetic process	92/5894	197/18866	3.62e-06	8.73e-05	5.73e-05	ABCB11/ACAT2/ACBD3/ACOT8/ADM/AKR1C4/AKR1D1/APOA4/ATP1A1/BAAT/BMP2/BMP5/BMP6/CGA/CRH/CYB5R1/CYB5R2/CYB5R3/CYP11B1/CYP11B2/CYP17A1/CYP19A1/CYP27A1/CYP2R1/CYP39A1/CYP46A1/CYP7A1/CYP7B1/DGKQ/DKKL1/EBP/ERLIN2/FASN/FDFT1/FDX1/FDXR/FGF1/FGFR4/FSHB/GFI1/GGPS1/H6PD/HMGCS1/HSD11B2/HSD17B1/HSD17B11/HSD17B12/HSD17B14/HSD17B2/HSD17B3/HSD17B6/HSD17B7/HSD17B8/HSD3B1/HSD3B2/IDI1/IFNG/IL1B/INSIG1/LEP/LPCAT3/MBTPS…	92
GO:0071375	BP	GO:0071375	cellular response to peptide hormone stimulus	142/5894	330/18866	3.63e-06	8.73e-05	5.73e-05	ACTN2/ADCY1/ADCY2/ADCY7/ADCY8/ADCY9/ADIPOQ/AGT/AGTR2/AKT2/APC/APOBEC1/APPL2/APRT/ASS1/ATP6AP1/ATP6V0A1/ATP6V0A2/ATP6V0D1/ATP6V0E2/ATP6V1A/ATP6V1B1/ATP6V1B2/ATP6V1E1/ATP6V1G1/ATP6V1H/BCAR3/C2CD5/CA2/CAMK2A/CAV1/CCND3/CDC5L/CPS1/CREB1/CRHBP/CRHR1/CRHR2/CRK/CSH1/CSRP3/CYP11B1/CYP11B2/EDN1/EIF4EBP1/ESRRA/FOXC2/FOXO1/FOXO4/FUT7/FYN/GCG/GCGR/GCK/GDF15/GH1/GH2/GHR/GHRHR/GHSR/GLP1R/GLP2R/GNAI2/GPLD1/GPR1…	142
GO:0031960	BP	GO:0031960	response to corticosteroid	79/5894	164/18866	4.06e-06	9.73e-05	6.39e-05	AANAT/ABCA3/ABCC2/ACSBG1/ADAM9/ADCYAP1/ADIPOQ/ADM/AGL/AGTR2/AGXT/AIF1/ALPL/APOA2/ASS1/AVPR1A/BAD/BCL2/BMP6/CALCR/CASP3/CCND1/CDKN1A/CPN1/CPS1/CRH/CSN1S1/CTSV/EDN1/EIF4EBP1/ENG/EPO/FECH/FLT3/FOSL1/FOXO1/GHRHR/GHSR/GNRH1/GSTP1/HSD11B2/HSD3B1/HSD3B2/HTR1B/IGFBP2/IL22/IL6/ISL1/KRAS/MSTN/MYOD1/NOTCH1/NR3C1/OXT/PAM/PAPPA/PCK1/PDX1/PFKFB1/PTAFR/PTGS2/PTPRU/REST/RPL27/SCGB1A1/SDC1/SRC/SSTR2/SSTR3/SSTR4/S…	79
GO:0062013	BP	GO:0062013	positive regulation of small molecule metabolic process	75/5894	154/18866	4.24e-06	0.000101437	6.66e-05	ABCD1/ABCD2/ADCYAP1R1/ADIPOQ/ADM/AKT2/APOA4/ARNT/ARPP19/AVP/AVPR1A/AVPR1B/BMP6/CD74/COMT/CPT1A/CYP7A1/DYRK2/EGF/ESRRB/FABP1/FGF1/FOXO1/GAPDHS/GCG/GCK/GHSR/GPD1/GPLD1/GPT/GUCA1B/GUCA2B/HTR2A/IFNG/IL1B/IL4/INS/INSR/IRS2/LHCGR/MID1IP1/MLXIPL/NFKB1/NOS1/NOS2/NOS3/NR1H2/NR1H4/NTSR1/P2RX7/P2RY1/PDGFB/PFKFB1/PFKFB3/PFKFB4/PLA2G3/POU1F1/PPARA/PPARD/PPARG/PRKAA1/PRKCE/PSEN1/PTAFR/PTGS2/PTH/RCVRN/SLC25A12/…	75
GO:0048588	BP	GO:0048588	developmental cell growth	107/5894	237/18866	4.35e-06	0.000103511	6.8e-05	ABL1/ADNP/ADRA1A/AGT/AGTR2/ANAPC2/ARHGAP4/ARIH2/BCL11A/BDNF/BMPR2/CAV3/CDH4/CDK5R1/CDKL3/CDKL5/CPNE6/CTDP1/CTNNB1/DBN1/DCC/DISC1/DNM2/DPYSL2/DSCAM/EDN1/EMX1/EPHA7/FGF13/FLRT1/FLRT3/FSTL4/GATA4/GDF9/GSK3A/HDAC6/IFRD1/IMPACT/IQGAP1/IST1/KIAA0319/KMT2D/L1CAM/LLPH/LPAR3/LRP1/MAG/MAP2/MAP3K13/MEGF8/MEX3C/MT3/MTOR/NDEL1/NDN/NEDD4L/NGF/NIN/NLGN3/NPPA/NTN1/OLFM1/PAFAH1B1/PAK6/PIN1/PLAA/POU4F2/POU4F3/PPAR…	107
GO:0070588	BP	GO:0070588	calcium ion transmembrane transport	135/5894	312/18866	4.4e-06	0.000103673	6.81e-05	ABL1/ADRA2A/AFG3L2/ANXA6/APLNR/ASIC1/ATG5/ATP2A1/ATP2A2/ATP2B2/ATP2B3/ATP2B4/ATP2C2/BDKRB1/BIN1/CACNA1B/CACNA1C/CACNA1D/CACNA1E/CACNA1F/CACNA1G/CACNA1I/CACNA1S/CACNA2D1/CACNA2D3/CACNB1/CACNB3/CACNG1/CACNG2/CACNG3/CACNG4/CACNG5/CALCR/CAPN3/CASQ1/CAV3/CCL21/CHD7/CHRNA10/CHRNA9/CLIC2/CRHR1/CUL5/CX3CL1/DRD1/DRD2/DRD3/DRD4/DYSF/F2/F2RL3/FAM155A/FAM155B/FASLG/FKBP1B/FYN/GAS6/GPM6A/GRIN1/GRIN2A/GRIN2B/G…	135
GO:0071214	BP	GO:0071214	cellular response to abiotic stimulus	142/5894	331/18866	4.41e-06	0.000103673	6.81e-05	AGT/AIPL1/AKT2/ANKRD1/AQP2/ARHGEF2/ASCL1/ASIC1/ATF4/ATM/ATP1A1/AVPR1A/BAD/BAG3/BCL2L1/BMP6/C9orf116/CAMKMT/CAPN3/CASP1/CASP3/CASP5/CASP8/CDKN1A/CLN3/CNGB1/CNN2/CRB1/CREBBP/CRIP1/DAG1/DDB2/DDX3X/DNM2/DYSF/EEF1D/ENG/EP300/EPO/ERCC1/ERCC4/FBXO4/FNTA/GADD45A/GATA3/GJA1/GNA11/GNAT1/GPLD1/GPR52/GPR68/GPR88/GRB2/GRK1/GRK4/GRM1/GTF2H5/GUCA1B/GUCY2F/HDAC4/HPCA/HRAS/HYAL1/HYAL2/HYAL3/IL13/IL1B/IMPACT/INSRR…	142
GO:0104004	BP	GO:0104004	cellular response to environmental stimulus	142/5894	331/18866	4.41e-06	0.000103673	6.81e-05	AGT/AIPL1/AKT2/ANKRD1/AQP2/ARHGEF2/ASCL1/ASIC1/ATF4/ATM/ATP1A1/AVPR1A/BAD/BAG3/BCL2L1/BMP6/C9orf116/CAMKMT/CAPN3/CASP1/CASP3/CASP5/CASP8/CDKN1A/CLN3/CNGB1/CNN2/CRB1/CREBBP/CRIP1/DAG1/DDB2/DDX3X/DNM2/DYSF/EEF1D/ENG/EP300/EPO/ERCC1/ERCC4/FBXO4/FNTA/GADD45A/GATA3/GJA1/GNA11/GNAT1/GPLD1/GPR52/GPR68/GPR88/GRB2/GRK1/GRK4/GRM1/GTF2H5/GUCA1B/GUCY2F/HDAC4/HPCA/HRAS/HYAL1/HYAL2/HYAL3/IL13/IL1B/IMPACT/INSRR…	142
GO:0031346	BP	GO:0031346	positive regulation of cell projection organization	165/5894	394/18866	4.42e-06	0.000103673	6.81e-05	ACTR2/ACTR3/ADCYAP1/ADNP/AGT/AKIRIN1/ANAPC2/ANKRD1/ANKRD27/APBB1/APC/ARHGAP35/ARHGDIA/ARHGEF7/ATF1/ATP8A2/BBS4/BCAS3/BDNF/BMP5/BMPR2/C21orf91/CAMK2B/CAPRIN1/CBFA2T2/CCL21/CDC42/CDC42EP1/CDC42EP2/CDH4/CDKL3/CDKL5/CENPJ/CNTF/CNTN1/CORO1B/CPNE6/CROCC/CRTC1/CUL7/CUX2/CX3CL1/DBN1/DEF8/DISC1/DLG4/DLG5/DNM1L/DNM2/DNM3/DPYSL3/DSCAM/ENPP2/EP300/EPHA4/EPO/EPS8/ESPN/F2RL1/FAM98A/FBXO31/FES/FGFR1/FKBP1B/FNBP…	165
GO:0043583	BP	GO:0043583	ear development	102/5894	224/18866	4.54e-06	0.000106118	6.97e-05	AHI1/ATG5/ATOH1/ATP6V1B1/ATP8A2/ATP8B1/BCL2/BCR/BDNF/BMP2/BMP4/BMP5/CDKN1B/CEBPA/CEBPD/CELSR1/CHD7/CHRNA10/CHRNA9/CYTL1/DCHS1/DLX6/EDN1/EPHA4/ESRRB/EYA1/FGF20/FGF8/FGF9/FGFR1/FGFR2/FOXG1/FOXI1/FRZB/FZD3/GABRA5/GABRB2/GABRB3/GATA3/GBX2/HES1/HESX1/HEY2/HOXA1/HPCA/HPN/INSIG1/JAG1/KCNK2/LHX3/LIN7A/LRIG1/MAF/MAPK1/MCOLN3/MSX1/MYCL/MYO15A/MYO3A/NAGLU/NEUROG1/NIPBL/NKX3-2/NOTCH1/NTN1/OSR2/PAFAH1B1/PAX2/…	102
GO:0035094	BP	GO:0035094	response to nicotine	29/5894	45/18866	4.57e-06	0.000106565	7e-05	AVP/BAD/BCL2/CASP3/CHRNA2/CHRNA3/CHRNB1/CHRNB2/CHRNB3/CHRNB4/CREB1/DRD2/EDN1/GNAT3/HDAC2/IL13/KCNK1/MAPK1/MSX1/NFKB1/NTRK1/PDX1/PENK/PPARA/RELA/SLC6A3/STAR/TH/TNF	29
GO:0014068	BP	GO:0014068	positive regulation of phosphatidylinositol 3-kinase signaling	48/5894	88/18866	4.74e-06	0.000110033	7.23e-05	AGT/ANGPT1/BECN1/CBL/CCL5/CD28/CSF3/DCN/EPO/EPOR/ERBB4/F2/F2RL1/FGFR1/FGR/FLT1/FLT3/FSHR/FYN/GH1/HAX1/HCLS1/HGF/INS/INSR/IRS2/KDR/LEP/NCF1/NEDD4/NTF3/NTRK1/OSM/PDGFB/PDGFD/PIK3CB/PIK3CG/PIK3R5/PPARD/ROR2/SELP/SOX9/SRC/TGFB2/TNF/UBE3A/UNC5B/WNT16	48
GO:0090257	BP	GO:0090257	regulation of muscle system process	114/5894	256/18866	4.8e-06	0.00011098	7.29e-05	ADORA1/ADRA1A/ADRA1B/ADRA2A/ADRA2B/ADRA2C/ADRB2/AGT/AIF1/ANXA6/ATP1A1/ATP2A1/ATP2A2/ATP2B4/BIN1/BMP10/CACNA1C/CALCA/CALCRL/CAMK2B/CASQ1/CAV1/CAV3/CDK9/CHRM2/CHRM3/CHRNA3/CHRNB4/CLIC2/CTDP1/CTNNA3/DAG1/DLG1/DOCK5/DSP/EDN1/FGF13/FKBP1B/FLNA/FOXO1/GATA4/GHSR/GJA5/GSK3A/GSTM2/GTF2IRD1/HAND2/HCN4/HDAC4/IGFBP5/ITGA2/JARID2/JUP/KCNA1/KCNB2/KCNJ2/LMCD1/MSTN/MTOR/MYBPC3/MYBPH/MYH7/MYL2/MYL3/MYOG/NEUROG1/N…	114
GO:0098739	BP	GO:0098739	import across plasma membrane	76/5894	157/18866	4.88e-06	0.000112481	7.39e-05	ABCC9/AGT/AKT2/ATP12A/ATP1A1/ATP2B4/CACNA2D1/CALCR/DLG1/FAM155A/FAM155B/FXYD2/FYN/HCN4/HFE/IFNG/IRS2/ISCU/KCNJ1/KCNJ10/KCNJ13/KCNJ14/KCNJ15/KCNJ16/KCNJ2/KCNJ3/KCNJ4/KCNJ5/KCNJ6/KCNJ8/KCNJ9/LRP2/NTSR1/PSEN1/RAMP3/RGS4/SLC12A1/SLC12A2/SLC12A3/SLC12A4/SLC12A5/SLC15A1/SLC15A2/SLC16A2/SLC1A1/SLC1A2/SLC1A3/SLC1A6/SLC22A2/SLC24A1/SLC24A2/SLC2A10/SLC2A5/SLC30A1/SLC31A1/SLC34A1/SLC5A2/SLC6A13/SLC6A14/SLC6…	76
GO:0001822	BP	GO:0001822	kidney development	124/5894	283/18866	5.06e-06	0.00011575	7.6e-05	ACE/ACVR2B/ADIPOQ/AGT/AGTR2/AHI1/ALDH1A2/ANGPT1/APAF1/APH1A/AQP2/ARL3/ASS1/BAG6/BCL2/BDNF/BMP2/BMP4/BMP6/CA2/CER1/CITED1/COL4A4/CRLF1/CTNNB1/CYP26B1/CYP4A11/DCHS1/DCN/DLG1/DLG5/EFNB2/EPHA4/EPHA7/EYA1/FGF1/FGF8/FGFR1/FGFR2/FOXC1/FOXC2/FOXJ1/FRAS1/GATA3/GCNT1/GCNT4/GDF11/GDNF/GPC3/GREB1L/HES1/HEYL/HYAL2/ID2/IL6R/IQGAP1/JAG1/JMJD6/KLF15/KLHL3/LHX1/LIF/LIN28A/LRP4/MAGI2/MMP17/MTSS1/MYO1E/NF1/NIPBL/NO…	124
GO:0051384	BP	GO:0051384	response to glucocorticoid	72/5894	147/18866	5.06e-06	0.00011575	7.6e-05	AANAT/ABCA3/ABCC2/ACSBG1/ADAM9/ADCYAP1/ADIPOQ/ADM/AGL/AGTR2/AGXT/AIF1/ALPL/APOA2/ASS1/AVPR1A/BAD/BCL2/BMP6/CALCR/CASP3/CCND1/CDKN1A/CPN1/CPS1/CRH/CTSV/EDN1/EIF4EBP1/EPO/FECH/FLT3/FOSL1/FOXO1/GHRHR/GHSR/GSTP1/HSD11B2/HSD3B1/HSD3B2/IGFBP2/IL22/IL6/ISL1/KRAS/MSTN/MYOD1/NR3C1/OXT/PAM/PAPPA/PCK1/PDX1/PFKFB1/PTAFR/PTGS2/PTPRU/REST/SCGB1A1/SDC1/SSTR2/SSTR3/SSTR4/SSTR5/STAR/TAT/TH/TNF/UBE2L3/UCP3/USP8/ZF…	72
GO:0014066	BP	GO:0014066	regulation of phosphatidylinositol 3-kinase signaling	64/5894	127/18866	5.07e-06	0.00011575	7.6e-05	AGT/ANGPT1/BECN1/BTN2A2/CBL/CCL5/CD28/CRYBA1/CSF3/DCN/EPO/EPOR/ERBB4/F2/F2RL1/FBXL2/FGFR1/FGR/FLT1/FLT3/FSHR/FYN/GH1/HAX1/HCLS1/HGF/INS/INSR/IRS2/KDR/LEP/LIME1/MAPK1/NCF1/NEDD4/NTF3/NTRK1/OSM/PDGFB/PDGFD/PIK3CB/PIK3CG/PIK3IP1/PIK3R5/PIP4K2A/PIP4K2B/PIP4K2C/PIP5K1A/PPARD/PPP2R5B/PPP2R5C/PTEN/PTPN13/ROR2/SELP/SOX9/SRC/STAMBP/TGFB2/TNF/TSC2/UBE3A/UNC5B/WNT16	64
GO:0021537	BP	GO:0021537	telencephalon development	115/5894	259/18866	5.17e-06	0.000117484	7.72e-05	AGTPBP1/ASCL1/ATAT1/ATOH1/ATP2B4/AVPR1A/AVPR2/BAD/BBS4/BCAN/BMP2/BMP4/BTBD3/CASP3/CCDC85C/CDH2/CDK5R1/CDK5R2/CDON/CHD7/CNTN2/CRK/CRKL/CSF1R/CTNNB1/DAB1/DCLK2/DISC1/DRD1/DRD2/EFHC1/EFNA2/EIF2B3/EMX1/EMX2/EPHA5/EPHB3/ERBB4/FEZF2/FGF13/FGF8/FLNA/FOXB1/FOXG1/GRIN1/HERC1/HES1/HSD3B1/HSD3B2/HTR5A/HTR6/ID2/KCNA1/KDM6B/KIF5B/LHX1/LHX5/LHX6/LRP1/LRP6/MBOAT7/MCPH1/NDEL1/NEUROD6/NF1/NIN/NKX2-1/NR2E1/NRGN/OX…	115
GO:0010001	BP	GO:0010001	glial cell differentiation	104/5894	230/18866	5.4e-06	0.000122434	8.04e-05	ABCA2/ABL1/ADAM22/AGER/AKT2/ARHGEF10/ASCL1/B4GALT6/BIN1/BMP2/CD9/CDH2/CDKN2C/CNP/CNTF/CNTN2/CNTNAP1/CRB1/CSPG5/CTNNB1/DAB1/DAG1/DICER1/DRD1/DRD3/EIF2B1/EIF2B2/EIF2B3/EMX1/EPHA4/ERCC2/F2/FGF5/GAP43/GCM1/GPC1/GPR17/GPR37L1/GSTP1/HDAC11/HDAC2/HES1/ID2/IFNG/IL1B/IL6/KCNJ10/KLF15/KRAS/LAMC3/LDLR/LIF/LIN28A/LRP1/MAG/MAPK1/MBD1/MED12/METRN/MT3/MTOR/NAB1/NAB2/NEUROD4/NF1/NKX2-1/NKX2-2/NLGN3/NOTCH1/NR2E1/…	104
GO:0021675	BP	GO:0021675	nerve development	44/5894	79/18866	5.64e-06	0.000126808	8.33e-05	AFG3L2/ATP8B1/BDNF/CHD7/CHRNB2/CTNNB1/CTSV/DAG1/DICER1/EPHB1/GABRA5/GABRB2/GABRB3/HES1/HOXA1/HOXB1/HOXB2/HOXB3/ISL1/KCNA2/LRIG1/LRIG2/NAV2/NEUROG1/NGF/NGFR/NKX2-2/NPTX1/NRTN/NTF3/NTRK1/PAX2/PHOX2A/PHOX2B/POU4F3/PRKCG/RET/SALL1/SEMA3A/SLC1A3/SLC25A46/TBX1/TFAP2A/UNC13A	44
GO:0031016	BP	GO:0031016	pancreas development	44/5894	79/18866	5.64e-06	0.000126808	8.33e-05	ACVR2B/ALDH1A2/ARNTL/BAD/BMP4/BMP5/BMP6/CCDC40/CTNNB1/DNAAF1/EIF2AK3/FOXO1/GDF11/GIP/GIPR/GSK3A/HES1/HNF1A/IL6/IL6R/INSM1/INSR/ISL1/MNX1/MSLN/NEUROG3/NKX2-2/NKX3-2/NR5A2/ONECUT1/PAX4/PAX6/PDX1/PROX1/RFX3/SHH/SIDT2/SMAD2/SMO/SOX9/TCF7L2/WFS1/WNT5A/ZIC3	44
GO:0048640	BP	GO:0048640	negative regulation of developmental growth	59/5894	115/18866	5.69e-06	0.000127181	8.35e-05	ADRB1/ADRB2/ARHGAP4/BCL11A/BMP4/CAV3/CDK5R1/CDKL3/CDKN1A/CDKN1B/CTDP1/CXADR/DCC/EPHA7/FGF13/FGFR3/FSTL4/GDF15/GJA1/GSK3A/IFRD1/JARID2/KCNK2/KIAA0319/LGMN/MAG/MAP2/MAPK11/MSTN/MT3/NTN1/PPARA/PTCH1/PTEN/PTPRS/RAI1/RBP4/RGS4/RNF6/RTN4/SEMA3A/SEMA3B/SEMA3D/SEMA4A/SEMA4G/SEMA6A/SEMA6B/SEMA6C/SEMA6D/SEMA7A/SOCS2/STK4/TLL2/TNR/TP73/TRIM46/ULK2/WNT5A/WWC3	59
GO:0001657	BP	GO:0001657	ureteric bud development	52/5894	98/18866	5.71e-06	0.000127181	8.35e-05	AGT/AGTR2/BCL2/BDNF/BMP2/BMP4/CER1/CITED1/CRLF1/CTNNB1/DCHS1/DLG1/EYA1/FGF1/FGF8/FGFR1/FGFR2/FOXC1/FOXC2/FOXJ1/GATA3/GDF11/GDNF/GPC3/GREB1L/HES1/LHX1/PAX2/PAX8/PKD2/PTCH1/RARA/RET/SALL1/SDC1/SDC4/SHH/SIM1/SIX2/SMAD2/SMAD3/SMAD4/SMAD5/SMAD6/SMO/SOX9/WNT1/WNT11/WNT2B/WNT4/WNT6/WT1	52
GO:0006835	BP	GO:0006835	dicarboxylic acid transport	52/5894	98/18866	5.71e-06	0.000127181	8.35e-05	ABCC2/ADORA1/AGXT/APBA1/AVP/AVPR1A/BDNF/CCK/FOLR3/GJA1/GLS2/GRM2/HRH3/KCNJ10/LRP2/LRRC8E/NF1/NPY5R/NTSR1/P2RX7/PPFIA2/PPFIA3/PPFIA4/PRAF2/PSEN1/RAB3A/RAB3GAP1/SLC12A2/SLC13A2/SLC17A6/SLC17A7/SLC19A2/SLC1A1/SLC1A2/SLC1A3/SLC1A6/SLC1A7/SLC22A6/SLC25A10/SLC25A11/SLC25A12/SLC25A21/SLC25A30/SLC26A1/SLC26A10/SLC26A3/SLC26A4/SLC38A2/SNAP25/STXBP1/SYT1/TRH	52
GO:0006937	BP	GO:0006937	regulation of muscle contraction	82/5894	173/18866	5.92e-06	0.000131287	8.62e-05	ADORA1/ADRA1A/ADRA1B/ADRA2A/ADRA2B/ADRA2C/ADRB2/ANXA6/ATP1A1/ATP2A1/ATP2A2/BIN1/BMP10/CACNA1C/CALCA/CALCRL/CASQ1/CAV1/CAV3/CHRM2/CHRM3/CHRNA3/CHRNB4/CLIC2/CTNNA3/DLG1/DOCK5/DSP/EDN1/FGF13/FKBP1B/FLNA/GATA4/GHSR/GJA5/GSTM2/HCN4/HDAC4/ITGA2/JUP/KCNA1/KCNB2/KCNJ2/MYBPC3/MYBPH/MYH7/MYL2/MYL3/NKX2-5/NOS1/NPPA/NPY2R/OXT/OXTR/PDE4B/PDE4D/PIK3CG/PKP2/PLCE1/PRKACA/PRKG1/PTAFR/PTGS2/RANGRF/SCN10A/SCN4A/SCN…	82
GO:0001823	BP	GO:0001823	mesonephros development	54/5894	103/18866	6.11e-06	0.000135002	8.87e-05	AGT/AGTR2/BCL2/BDNF/BMP2/BMP4/CER1/CITED1/CRLF1/CTNNB1/DCHS1/DLG1/EYA1/FGF1/FGF8/FGFR1/FGFR2/FOXC1/FOXC2/FOXJ1/GATA3/GDF11/GDNF/GPC3/GREB1L/HES1/LHX1/OSR2/PAX2/PAX8/PKD2/PTCH1/RARA/REN/RET/SALL1/SDC1/SDC4/SHH/SIM1/SIX2/SMAD2/SMAD3/SMAD4/SMAD5/SMAD6/SMO/SOX9/WNT1/WNT11/WNT2B/WNT4/WNT6/WT1	54
GO:0072001	BP	GO:0072001	renal system development	127/5894	292/18866	6.13e-06	0.000135043	8.87e-05	ACE/ACVR2B/ADIPOQ/AGT/AGTR2/AHI1/ALDH1A2/ANGPT1/APAF1/APH1A/AQP2/ARL3/ASS1/BAG6/BCL2/BDNF/BMP2/BMP4/BMP6/CA2/CER1/CITED1/COL4A4/CRLF1/CTNNB1/CYP26B1/CYP4A11/DCHS1/DCN/DLG1/DLG5/EFNB2/EMX2/EPHA4/EPHA7/EYA1/FGF1/FGF8/FGFR1/FGFR2/FOXC1/FOXC2/FOXJ1/FRAS1/GATA3/GCNT1/GCNT4/GDF11/GDNF/GPC3/GREB1L/HES1/HEYL/HYAL2/ID2/IL6R/IQGAP1/JAG1/JMJD6/KLF15/KLHL3/LHX1/LIF/LIN28A/LRP4/MAGI2/MMP17/MTSS1/MYO1E/NF1/NIP…	127
GO:0120255	BP	GO:0120255	olefinic compound biosynthetic process	23/5894	33/18866	6.29e-06	0.000138058	9.07e-05	ADM/ALOX12B/ALOX15/ALOX5/ALOXE3/BMP2/BMP5/BMP6/CYP11B1/CYP11B2/CYP19A1/DGKQ/DKKL1/FSHB/GSTM1/GSTM2/GSTP1/H6PD/HSD17B3/REST/SRD5A2/STAR/WNT4	23
GO:0045834	BP	GO:0045834	positive regulation of lipid metabolic process	74/5894	153/18866	6.72e-06	0.000147034	9.66e-05	AADAC/ABCD1/ABCD2/ABHD6/ADIPOQ/ADM/ADORA1/AGAP2/AGT/AKT2/AMBRA1/ANGPTL3/APOA2/APOA4/ATG14/AVP/AVPR1A/BMP6/CCL21/CD74/CDC42/CGA/CPT1A/CREB1/CREBL2/CTDNEP1/CYP7A1/EEF1A2/F2/FABP1/FABP3/FGF1/FGFR3/FGR/FLT1/FLT3/FSHB/GHSR/GPLD1/HTR2A/HTR2B/HTR2C/IFNG/IL1B/INS/IRS2/LDLR/MID1IP1/MLXIPL/MTOR/NR1H2/NR1H4/PDGFB/PLA2G3/PLA2G6/PNPLA2/PPARA/PPARD/PPARG/PRKAA1/PRKCE/PRKD1/PTGS2/PTK2B/RAB38/SCT/SIRT4/SPHK2/SRC…	74
GO:0001708	BP	GO:0001708	cell fate specification	53/5894	101/18866	7.16e-06	0.00015588	0.000102366	APC/APC2/ASCL1/ATOH1/BMPR1A/CDON/CTNNB1/DKK1/EVX1/EYA1/FEV/FGFR1/FOXA1/FZD7/ISL1/LBX1/LHX3/MGA/MNX1/MYL2/MYT1L/NANOG/NKX2-2/NOTCH1/OLIG2/PAX2/PAX6/POU1F1/POU3F2/PRDM14/PSEN1/PTCH1/PTCH2/RBPJ/SHH/SIX2/SMO/SOX1/SOX18/SOX2/SOX9/TBR1/TBX1/TBX10/TBX19/TBX2/TBX21/TBX3/TBX4/TENM4/TLX3/WNT11/WNT5A	53
GO:0007623	BP	GO:0007623	circadian rhythm	99/5894	218/18866	7.17e-06	0.00015588	0.000102366	AANAT/ADCY1/ADIPOQ/ADORA1/ADRB1/AGRP/AHCY/ARNTL/ASS1/ATF4/ATG7/BDNF/CARTPT/CCAR2/CHRNB2/CPT1A/CREB1/CREM/CRH/CRTC1/CSF2/CSNK1D/CSNK1E/DBP/DDC/DRD2/DRD3/DRD4/EP300/F7/FBXL8/GFPT1/GHRH/GHRHR/GNA11/GPR176/HCRTR2/HDAC2/HDAC3/HNRNPD/HS3ST2/HTR7/HUWE1/ID1/ID2/KCNA2/KDM2A/KDM5A/KDM8/KMT2A/LEP/MAGEL2/MAPK10/MAPK9/MC3R/MTNR1A/MTNR1B/MTOR/NAGLU/NDUFA9/NGFR/NKX2-1/NOS2/NPY2R/NRIP1/NTRK1/OGT/OPRL1/PDE6B/PER3…	99
GO:0007597	BP	GO:0007597	blood coagulation	intrinsic pathway	15/5894	18/18866	7.54e-06	0.000163464	0.000107347	A2M/APOH/C1QBP/F11/F12/F2/F8/F9/GP1BA/GP5/GP9/KNG1/PRCP/SERPINC1/SERPING1	15
GO:0016052	BP	GO:0016052	carbohydrate catabolic process	92/5894	200/18866	7.85e-06	0.000169567	0.000111354	AAAS/AGL/ALDH1A1/ALDOA/ALDOC/AOAH/ARNT/BAD/BPGM/CBFA2T3/DCXR/DERA/EIF6/ENO3/ENOSF1/EP300/ESRRB/FUT4/FUT5/FUT7/GAPDH/GAPDHS/GBA3/GCK/GK/GK2/GM2A/GPD1/GPD2/GPI/GSK3A/HDAC4/HKDC1/HTR2A/IFNG/INS/INSR/KHK/MAN2C1/MGAM/MLXIPL/MYOG/NAGA/NEU2/NEU3/NUP188/NUP214/NUP54/NUP88/NUP98/NUPR1/OGDH/OGDHL/OGT/P2RX7/PFKFB1/PFKFB3/PFKFB4/PFKL/PFKP/PGAM1/PGK1/PGK2/PHKA1/PHKA2/PHKG1/PKLR/POM121/PPARA/PPP1R3D/PRKAA1/PRK…	92
GO:0016079	BP	GO:0016079	synaptic vesicle exocytosis	61/5894	121/18866	8.23e-06	0.000177172	0.000116348	ADCY1/ADRA1A/APBA1/APBA2/ATP2A2/BACE1/CACNA1D/CADPS/CADPS2/CHRM2/CHRNA6/CHRNB2/CHRNB3/CPLX2/CPLX3/CSPG5/CTBP2/DNM1L/DOC2A/DOC2B/DRD1/DRD2/ERC2/GRIK5/HTR1B/HTR2A/NCS1/OTOF/P2RX7/P2RY1/P2RY4/PCLO/PPFIA2/PPFIA3/PREPL/PRKCG/PSEN1/RAB3A/RAB3GAP1/RIMS3/SCRIB/SLC4A8/SNAP23/SNAP25/SNCA/STX11/STX3/STX4/STXBP1/STXBP5L/SYN1/SYNJ1/SYP/SYT1/SYT12/SYT17/SYT2/SYT5/TRIM9/UNC13A/WNT7A	61
GO:0072163	BP	GO:0072163	mesonephric epithelium development	52/5894	99/18866	8.4e-06	0.000179571	0.000117923	AGT/AGTR2/BCL2/BDNF/BMP2/BMP4/CER1/CITED1/CRLF1/CTNNB1/DCHS1/DLG1/EYA1/FGF1/FGF8/FGFR1/FGFR2/FOXC1/FOXC2/FOXJ1/GATA3/GDF11/GDNF/GPC3/GREB1L/HES1/LHX1/PAX2/PAX8/PKD2/PTCH1/RARA/RET/SALL1/SDC1/SDC4/SHH/SIM1/SIX2/SMAD2/SMAD3/SMAD4/SMAD5/SMAD6/SMO/SOX9/WNT1/WNT11/WNT2B/WNT4/WNT6/WT1	52
GO:0072164	BP	GO:0072164	mesonephric tubule development	52/5894	99/18866	8.4e-06	0.000179571	0.000117923	AGT/AGTR2/BCL2/BDNF/BMP2/BMP4/CER1/CITED1/CRLF1/CTNNB1/DCHS1/DLG1/EYA1/FGF1/FGF8/FGFR1/FGFR2/FOXC1/FOXC2/FOXJ1/GATA3/GDF11/GDNF/GPC3/GREB1L/HES1/LHX1/PAX2/PAX8/PKD2/PTCH1/RARA/RET/SALL1/SDC1/SDC4/SHH/SIM1/SIX2/SMAD2/SMAD3/SMAD4/SMAD5/SMAD6/SMO/SOX9/WNT1/WNT11/WNT2B/WNT4/WNT6/WT1	52
GO:0001764	BP	GO:0001764	neuron migration	78/5894	164/18866	8.43e-06	0.000179755	0.000118045	ARHGEF2/ASCL1/ASTN1/ASTN2/ATOH1/BBS4/CAMK2A/CAMK2B/CCK/CCR4/CDK5R1/CDK5R2/CDKL5/CELSR1/CELSR2/CHL1/CNTN2/CRK/CRKL/CTNNA2/CTNNB1/CX3CL1/DAB1/DCC/DISC1/DRD1/DRD2/ELP3/ERBB4/FBXO31/FEZF2/FGF13/FGFR1/FLNA/FOXG1/FYN/FZD3/GAS6/GATA3/GFRA3/GNRH1/GPM6A/GPR173/KIAA0319/LHX1/LHX6/LRIG2/NDEL1/NDN/NEUROD4/NIPBL/NKX2-1/NTN1/NTNG1/PAFAH1B1/PAX6/PHACTR1/PHOX2B/PLAA/PLXNB2/PRKG1/PSEN1/RAC1/SCRT1/SEMA3A/SEMA6A/SO…	78
GO:0048863	BP	GO:0048863	stem cell differentiation	116/5894	264/18866	8.57e-06	0.000182131	0.000119605	A2M/ABL1/ACE/ALDH1A2/ALX1/ANXA6/ASCL1/BATF/BMP4/BMPR1A/CDK13/CHD2/DNMT3L/EDN1/ELL3/ERBB4/ERCC2/ESR1/ESRRB/FGFR2/FOXA1/FOXC1/FOXC2/FOXO4/FRZB/GATA1/GATA3/GATA4/GBX2/GDNF/GPM6A/HAND2/HES1/HTR2B/ISL1/JAG1/JARID2/KDM3A/KDM4C/KITLG/KLHL12/KMT2A/LIF/LIN28A/LMO1/LRP6/LTBP3/MAPK1/MEOX1/MLLT3/MSX1/MYB/N4BP2L2/NELFB/NFE2L2/NKX2-5/NOTCH1/NRTN/OSM/OVOL2/PAX2/PDCD6/PDX1/PHOX2B/PSMA5/PSMB6/PSMB7/PSMC3/PSMC4/PS…	116
GO:0034329	BP	GO:0034329	cell junction assembly	178/5894	434/18866	8.64e-06	0.000182831	0.000120065	ABL1/ACE/ACHE/ACTB/ACTN2/ACTN4/ADD2/ADNP/AGT/APC/ARHGEF7/ARL2/ARVCF/BCAS3/BCL2/BCR/BDNF/BSN/CAPZA1/CAV1/CBLN1/CD151/CD9/CDC42/CDH1/CDH10/CDH12/CDH18/CDH2/CDH20/CDH5/CDH6/CDH7/CDH8/CDH9/CEL/CHRNB2/CLASP1/CLDN14/CLDN16/CLDN3/CLDN6/CLDN8/CLDN9/CLSTN2/CLSTN3/CNTN5/CNTNAP1/COLQ/CRKL/CTNNB1/CTNND2/CUX2/DCHS1/DKK1/DLG1/DLG5/DMTN/DNM3/DRD1/DRD2/DSCAM/EFNB2/EPB41L5/EPHA7/EPHB1/EPHB3/ERBB4/FGF13/FLNA/FLRT3…	178
GO:0061005	BP	GO:0061005	cell differentiation involved in kidney development	34/5894	57/18866	8.7e-06	0.000183659	0.000120609	ADIPOQ/BMP4/CITED1/CTNNB1/FOXC2/FOXJ1/GATA3/GDNF/HES1/IQGAP1/JAG1/KLF15/LHX1/LIF/MAGI2/MTSS1/MYO1E/NOTCH1/NPHS1/NPHS2/PAX2/PAX8/PDGFB/POU3F3/PRKX/PTCH1/PTPRO/SALL1/SHH/SIX2/SMO/WNT4/WT1/YAP1	34
GO:0010977	BP	GO:0010977	negative regulation of neuron projection development	74/5894	154/18866	9.01e-06	0.000189456	0.000124415	ARHGAP4/ARHGDIA/BAG5/BCL11A/CBFA2T2/CDK5R1/CDKL3/CIB1/DAB1/DCC/DKK1/DNM3/DPYSL3/EFNB2/EFNB3/EPHA4/EPHA7/FGF13/FKBP4/FSTL4/GFI1/GSK3A/HDAC2/ID1/IFRD1/INPP5J/KIAA0319/LRIG2/LRP1/LRP4/MAG/MAP2/MCF2/MDM2/MT3/MYLIP/NGFR/NLGN3/NTN1/PAFAH1B1/PAQR3/PLK2/PMP22/PPP3CA/PSEN1/PTEN/PTPRO/PTPRS/RAP1GAP2/RIT2/RNF6/RTN4/SEMA3A/SEMA3B/SEMA3D/SEMA4A/SEMA4G/SEMA6A/SEMA6B/SEMA6C/SEMA6D/SEMA7A/STMN2/TLX2/TNR/TRIM46/T…	74
GO:0009952	BP	GO:0009952	anterior/posterior pattern specification	99/5894	219/18866	9.1e-06	0.000190841	0.000125324	ACVR2B/ALDH1A2/ALX1/ALX4/ARC/ATM/ATP6AP2/BARX1/BMP2/BMP4/BMPR1A/BMPR2/CDON/CDX1/CDX2/CELSR1/CELSR2/CER1/CRKL/CTNNB1/DKK1/DLL3/EMX2/EP300/EPB41L5/ETS2/FEZF2/FGF8/FOXB1/FOXC1/FOXC2/FOXH1/FRS2/FUZ/FZD5/GATA4/GBX2/GDF11/GDF3/GPC3/GRSF1/HES1/HES2/HEY2/HEYL/HHEX/HOXA5/HOXA6/HOXB1/HOXB2/HOXB3/HOXB5/HOXB6/HOXB8/HOXB9/HOXC4/HOXC5/HOXC8/LFNG/LHX1/LRP6/MED12/MEOX1/MLLT3/MSX1/MYF5/MYF6/NEUROG1/NOTCH1/PAX6/PC…	99
GO:0002286	BP	GO:0002286	T cell activation involved in immune response	56/5894	109/18866	9.23e-06	0.000192198	0.000126216	APBB1IP/BATF/CD46/CD74/F2RL1/FCGR2B/FOXP3/GATA3/GPR183/HLA-DMB/IFNA1/IFNA10/IFNA14/IFNA16/IFNA17/IFNA2/IFNA4/IFNA5/IFNA7/IFNA8/IFNB1/IFNG/IFNW1/IL12B/IL12RB1/IL18R1/IL21/IL23A/IL4/IL4R/IL6/IRF4/JAK3/LCP1/LGALS9/MALT1/MTOR/MYB/NLRP3/PCK1/PRKCZ/PSEN1/PTGER4/RARA/RC3H1/RC3H2/SEMA4A/SOCS5/SPN/STAT3/STAT6/TBX21/TNFSF18/TP53/TSC1/ZBTB7B	56
GO:0021761	BP	GO:0021761	limbic system development	56/5894	109/18866	9.23e-06	0.000192198	0.000126216	ATAT1/ATP2B4/BBS4/BCAN/CASP3/CDK5R1/CDK5R2/CRH/CRK/CRKL/DAB1/DCLK2/DRD1/DRD2/EIF2B3/EMX2/EPHA5/ETS1/FEZF2/FGF13/FGFR1/FGFR2/FOXB1/HAP1/HSD3B1/HSD3B2/HTR5A/KCNA1/KDM6B/KIF5B/LHX5/NEUROD6/NF1/NKX2-1/NR0B1/NR2E1/PAFAH1B1/PHLPP2/POU3F2/PROP1/PROX1/PTEN/PTPRS/RAB3GAP1/RARA/SCT/SEMA3A/SMO/SOX3/SRF/TBR1/TBX3/TSC1/UBA6/XRCC1/YWHAE	56
GO:0043491	BP	GO:0043491	protein kinase B signaling	121/5894	278/18866	9.62e-06	0.000199745	0.000131172	ADTRP/ANGPT1/BAG4/BTN2A2/C1QBP/C1QTNF1/CALCR/CAV3/CCL2/CCL21/CCL5/CD28/CIB1/CRYBA1/CSF3/CX3CL1/DAG1/DLG1/DRD2/DRD3/EGF/ENG/ERBB4/ESR1/F3/F7/FGF1/FGF16/FGF17/FGF18/FGF20/FGF22/FGF3/FGF4/FGF5/FGF6/FGF8/FGF9/FGFR1/FGFR2/FGFR3/FGFR4/FRS2/FYN/GAS6/GATA3/GATA4/GCNT2/GDF15/GPX1/GRB2/GRM2/HAX1/HCLS1/HGF/HYAL2/IAPP/IGFBP5/IL1B/IL26/INPP5K/INS/INSR/IRS2/KDR/KITLG/LEP/LIN28A/LRP2/MAGI2/MST1R/MSTN/MT3/MTM1/M…	121
GO:0070509	BP	GO:0070509	calcium ion import	46/5894	85/18866	9.81e-06	0.000200674	0.000131782	AFG3L2/ATP2A1/ATP2A2/ATP2B4/ATP2C2/CACNA1B/CACNA1C/CACNA1D/CACNA1E/CACNA1F/CACNA1G/CACNA1I/CACNA1S/CACNA2D1/CALCR/CASR/CAV3/CCL2/CRH/CTNNB1/DYSF/EGF/FAM155A/FAM155B/FYN/GCG/GCK/GRM6/MICU1/MICU2/PDGFB/PKD2/RAMP3/SEMG1/SLC24A1/SLC24A2/SLC30A1/SLC8A1/SLN/SPHK2/TRPC4/TRPM2/TRPV4/TRPV5/TRPV6/ZMPSTE24	46
GO:0032303	BP	GO:0032303	regulation of icosanoid secretion	16/5894	20/18866	9.84e-06	0.000200674	0.000131782	AGTR2/AVPR1B/CYP4A11/CYP4F2/EDN1/IL1B/MAP2K6/MIF/NTSR1/OXT/P2RX7/PLA2G6/PLA2R1/SSTR4/SYK/TNFSF11	16
GO:0060231	BP	GO:0060231	mesenchymal to epithelial transition	16/5894	20/18866	9.84e-06	0.000200674	0.000131782	BMP4/CITED1/CTNNB1/FZD7/GATA3/GDNF/LIF/PAX2/PAX8/PELO/SALL1/SIX2/SMO/TCF15/WNT4/WT1	16
GO:0098659	BP	GO:0098659	inorganic cation import across plasma membrane	51/5894	97/18866	9.85e-06	0.000200674	0.000131782	ABCC9/ATP12A/ATP1A1/ATP2B4/CACNA2D1/CALCR/DLG1/FAM155A/FAM155B/FXYD2/FYN/HCN4/HFE/IFNG/ISCU/KCNJ1/KCNJ10/KCNJ13/KCNJ14/KCNJ15/KCNJ16/KCNJ2/KCNJ3/KCNJ4/KCNJ5/KCNJ6/KCNJ8/KCNJ9/RAMP3/SLC12A1/SLC12A2/SLC12A3/SLC12A4/SLC12A5/SLC24A1/SLC24A2/SLC30A1/SLC31A1/SLC34A1/SLC5A2/SLC8A1/SLC9A2/SLC9A3/SLC9A5/SLC9A6/SLC9A7/TRPM2/TRPM4/TRPV4/TRPV5/TRPV6	51
GO:0099587	BP	GO:0099587	inorganic ion import across plasma membrane	51/5894	97/18866	9.85e-06	0.000200674	0.000131782	ABCC9/ATP12A/ATP1A1/ATP2B4/CACNA2D1/CALCR/DLG1/FAM155A/FAM155B/FXYD2/FYN/HCN4/HFE/IFNG/ISCU/KCNJ1/KCNJ10/KCNJ13/KCNJ14/KCNJ15/KCNJ16/KCNJ2/KCNJ3/KCNJ4/KCNJ5/KCNJ6/KCNJ8/KCNJ9/RAMP3/SLC12A1/SLC12A2/SLC12A3/SLC12A4/SLC12A5/SLC24A1/SLC24A2/SLC30A1/SLC31A1/SLC34A1/SLC5A2/SLC8A1/SLC9A2/SLC9A3/SLC9A5/SLC9A6/SLC9A7/TRPM2/TRPM4/TRPV4/TRPV5/TRPV6	51
GO:0120162	BP	GO:0120162	positive regulation of cold-induced thermogenesis	51/5894	97/18866	9.85e-06	0.000200674	0.000131782	ACADL/ACHE/ACSL1/ADCYAP1/ADIPOQ/ADRB1/ADRB2/ADRB3/APC/APPL2/CAV1/CCR2/CD36/DBH/EBF2/EHMT1/EPAS1/FABP4/FABP5/FH/GJA1/GNAS/GPR3/HADH/HDAC3/IL13/IL4/IL4R/IRF4/KDM3A/KDM6B/LEP/MFN2/OGT/OXT/OXTR/PEMT/PHOX2B/PRDM16/PRLR/PTH2R/SIRT6/SLN/STAT6/SYK/THRA/TRPM8/TSHR/UCP1/YBX2/ZBTB7B	51
GO:0042531	BP	GO:0042531	positive regulation of tyrosine phosphorylation of STAT protein	40/5894	71/18866	1.02e-05	0.000207521	0.000136278	CCL5/CNTF/CRLF1/CSF1R/CSF2/CSH1/CTF1/EPO/ERBB4/FGFR3/FLT3/FYN/GH1/GH2/GHR/HCLS1/HDAC2/HES1/HPX/IFNA2/IFNG/IL12B/IL13/IL15/IL21/IL23A/IL3/IL4/IL6/IL6R/ISL1/LEP/LIF/OSM/PECAM1/PIBF1/STAT3/TNF/TNFRSF1A/TNFSF18	40
GO:0032892	BP	GO:0032892	positive regulation of organic acid transport	26/5894	40/18866	1.13e-05	0.000229514	0.000150721	ABCB11/AGT/AVP/AVPR1A/AVPR1B/CCK/CYP4A11/CYP4F2/EDN1/FABP3/IL1B/MAP2K6/MIF/NTSR1/OXT/P2RX7/PLA2G6/PLA2R1/PSEN1/RAB3GAP1/SLC12A2/SLC38A3/SSTR4/STXBP1/TNFSF11/TRH	26
GO:0007589	BP	GO:0007589	body fluid secretion	50/5894	95/18866	1.16e-05	0.00023316	0.000153115	ADORA1/ALOX12B/APRT/ATG5/ATP7B/CAV1/CCND1/CEL/CELSR2/CHRM3/CREB1/CSN2/CSN3/DHODH/EDN1/ERBB4/FOXB1/GHRHR/GUCA1B/GUCA2B/KALRN/KCNN4/NCOR2/NEURL1/NEUROG1/NPPB/NPR3/NR1H2/OPRK1/OXTR/PAM/PRKCE/PRL/PRLR/SCT/SERPINC1/SLC22A2/SLC29A1/SLC4A5/SLC6A3/SOCS2/STAT5A/STAT5B/SYTL2/TAC1/USF2/VDR/VIP/XDH/ZBTB7B	50
GO:0045777	BP	GO:0045777	positive regulation of blood pressure	25/5894	38/18866	1.22e-05	0.000245435	0.000161177	ACE/ADH5/ADORA1/ADRA1A/ADRA1B/ADRA2B/ADRB1/AGT/AVP/AVPR1A/AVPR2/CARTPT/CYP11B2/DRD5/GLP1R/GRIP2/HSD11B2/ID2/NPFF/OR51E2/OXT/OXTR/PDE4D/TAC3/TACR3	25
GO:0072009	BP	GO:0072009	nephron epithelium development	56/5894	110/18866	1.31e-05	0.000263015	0.000172721	ADIPOQ/AGT/AGTR2/AHI1/BCL2/BMP2/BMP4/CITED1/CTNNB1/DCHS1/DLG1/EYA1/FGF1/FGF8/FOXC1/FOXC2/FOXJ1/GATA3/GDNF/GPC3/GREB1L/HES1/HEYL/IQGAP1/JAG1/KLF15/KLHL3/LHX1/LIF/MAGI2/MTSS1/MYO1E/NOTCH1/NPHS1/NPHS2/PAX2/PAX8/PECAM1/PKD2/POU3F3/PTCH1/PTPRO/SALL1/SHH/SIX2/SMAD4/SMO/SOX9/UMOD/WNT1/WNT11/WNT2B/WNT4/WNT6/WT1/YAP1	56
GO:0097485	BP	GO:0097485	neuron projection guidance	123/5894	285/18866	1.33e-05	0.000265783	0.000174539	ARHGAP35/ATOH1/BDNF/BMPR1B/BMPR2/CDH4/CDK5R1/CHL1/CNTN2/CNTN6/CSF1R/DAB1/DAG1/DCC/DOK1/DOK2/DOK5/DPYSL2/DPYSL4/DSCAM/EFNA2/EFNA3/EFNB2/EFNB3/EPHA4/EPHA5/EPHA7/EPHB1/EPHB3/ETV1/FEZ2/FEZF2/FGF8/FLRT3/FOXG1/FRS2/FYN/FZD3/GAP43/GATA3/GBX1/GBX2/GDNF/GFRA2/GFRA3/GFRA4/GPC1/GRB2/IRS2/ISL1/KIF3A/KIF5A/KIF5B/L1CAM/LAMA1/LHX1/LHX3/LRP1/LRTM1/LYPLA2/MAPK1/MEGF8/NGFR/NKX2-1/NOTCH1/NOTCH3/NPTN/NRTN/NTN1/NTN3/…	123
GO:0098664	BP	GO:0098664	G protein-coupled serotonin receptor signaling pathway	23/5894	34/18866	1.37e-05	0.000272613	0.000179024	CHRM2/CHRM3/CHRM4/CHRM5/DRD4/HRH2/HRH3/HRH4/HTR1A/HTR1B/HTR1D/HTR1E/HTR1F/HTR2A/HTR2B/HTR2C/HTR4/HTR5A/HTR6/HTR7/OR10H1/OR10H2/OR10H3	23
GO:0032024	BP	GO:0032024	positive regulation of insulin secretion	41/5894	74/18866	1.38e-05	0.000274713	0.000180403	AACS/ADCY8/BAD/BAIAP3/CASR/CRH/DOC2B/GCG/GCK/GIP/GIPR/GJA1/GLUD1/GPLD1/GPR27/GPR68/IRS2/ISL1/KIF5B/LRP1/MPC2/NADK/NNAT/NR1H4/PDX1/PLA2G6/PPARD/PPP3CB/PRKCE/PSMD9/RAC1/RBP4/RPH3AL/STX4/SYBU/TARDBP/TCF7L2/TM7SF3/TRH/TRPM4/VSNL1	41
GO:0008211	BP	GO:0008211	glucocorticoid metabolic process	19/5894	26/18866	1.4e-05	0.000277195	0.000182033	ATP1A1/BMP2/BMP5/CRH/CYP11B1/CYP11B2/CYP17A1/DGKQ/GAL/H6PD/HSD11B2/HSD3B1/HSD3B2/MECP2/REST/SERPINA6/STAR/STUB1/WNT4	19
GO:0015872	BP	GO:0015872	dopamine transport	30/5894	49/18866	1.42e-05	0.000279517	0.000183558	CHRM5/CHRNA6/CHRNB2/DRD1/DRD2/DRD3/DRD4/FGF20/GDNF/HTR1B/HTR2A/KCNA2/NPY2R/RAB3A/RAB3B/SLC18A2/SLC22A1/SLC22A2/SLC22A3/SLC6A2/SLC6A3/SNCA/SYT1/SYT11/SYT12/SYT13/SYT17/SYT2/SYT5/TOR1A	30
GO:0045058	BP	GO:0045058	T cell selection	30/5894	49/18866	1.42e-05	0.000279517	0.000183558	AIRE/ATG5/BATF/BCL2/CD1D/CD28/CD3D/CD3E/CD3G/CD74/CYLD/DOCK2/FOXP3/GATA3/IL12B/IL12RB1/IL15/IL23A/IL6/IRF4/ITPKB/MTOR/SHH/SPN/SRF/STAT3/STAT6/STK11/SYK/TBX21	30
GO:0021953	BP	GO:0021953	central nervous system neuron differentiation	88/5894	192/18866	1.46e-05	0.000285547	0.000187518	ABT1/AGTPBP1/ARHGAP35/ASCL1/B4GALT6/C21orf91/CBLN1/CEND1/CHD5/CHRNB2/CNTN2/CRK/CRKL/CSF1R/CSNK1D/CSNK1E/CTNNB1/DCC/DCLK2/DISC1/DKK1/DRD1/DRD2/DYNC2H1/EMX1/EPHA4/EPHB1/EPHB3/ERBB4/EVX1/FEZF2/FGF8/FGFR2/FOXG1/GABRB1/GBX1/GBX2/GDPD5/HERC1/HES1/ISL1/LBX1/LEP/LHX1/LHX3/LHX5/LHX6/LRP6/MAP2/MNX1/NDEL1/NIN/NKX2-1/NKX2-2/NR2E1/OLIG2/OPHN1/PAFAH1B1/PAX6/PAX7/PHOX2A/PHOX2B/PROX1/PSEN1/PTCH1/PTEN/RAC3/ROBO1/…	88
GO:0045137	BP	GO:0045137	development of primary sexual characteristics	102/5894	229/18866	1.46e-05	0.000285547	0.000187518	ACVR1B/ADAM15/ADAM20/ADAM21/ADCYAP1/ADCYAP1R1/AFP/AMHR2/ARID4B/ATM/ATRX/BCL2/BCL2L1/BMPR1B/CASP3/CBL/CBX2/CCND1/CRKL/CTSV/CYP19A1/DACH1/DMC1/DMRT1/EIF2B2/ERCC1/ESR1/FGF8/FGF9/FLNA/FNDC3A/FOXC1/FSHB/FSHR/GATA1/GATA3/GATA4/GDF9/GNRH1/HMGCS1/HYAL3/IDH1/ING2/INHA/INSR/KDM5A/KITLG/KMT2B/LEP/LFNG/LHCGR/LRP2/LRRC6/MAMLD1/MSH4/NKX2-1/NOS3/NR0B1/NR5A1/NRIP1/NTRK1/NUPR1/PCYT1B/PGR/PLEKHA1/PRKACG/PTX3/RAB13…	102
GO:1903793	BP	GO:1903793	positive regulation of anion transport	34/5894	58/18866	1.47e-05	0.00028593	0.00018777	ABCA7/ABCB11/ABCB4/AGT/ATF4/ATP8A2/AVP/AVPR1A/AVPR1B/CCK/CETP/CYP4A11/CYP4F2/EDN1/FABP3/IL1B/MAP2K6/MIF/NTSR1/OXT/P2RX7/PLA2G6/PLA2R1/PSEN1/PTAFR/RAB3GAP1/SLC12A2/SLC34A1/SLC38A3/SSTR4/STXBP1/TNFSF11/TRH/TRIAP1	34
GO:0009791	BP	GO:0009791	post-embryonic development	46/5894	86/18866	1.47e-05	0.00028593	0.00018777	ABL1/ACO1/ACVR2B/ALDH5A1/ALX4/ASH1L/ATM/ATRX/BCL2/BMP4/CCDC47/CRB1/CYP1A2/DSCAM/EFEMP1/EMX1/ERCC1/ERCC2/ETNK2/FGFR2/FZD5/GABRG2/GATA3/GNAS/HEG1/HMGN1/IREB2/KDM5B/LHX1/MECP2/MORC3/MTOR/MYL2/MYO1E/NDN/NPPC/PLAGL2/PLEKHA1/PSEN1/RAB3A/RC3H2/SGPL1/SLC18A2/SLC4A10/SMAD2/SZT2	46
GO:0045445	BP	GO:0045445	myoblast differentiation	46/5894	86/18866	1.47e-05	0.00028593	0.00018777	AKIRIN1/ANKRD2/BMP4/CAPN3/CDON/DDX17/EPAS1/FGF6/FLOT2/FLT3LG/GDF3/HIF1AN/HINFP/IFRD1/ISL1/JAG1/MAML1/MAP3K5/MBNL1/MSTN/MYF5/MYF6/MYOD1/MYOG/NMRK2/NOTCH1/PLCB1/PLG/PPARD/RB1/RBPJ/REST/SDC1/SHH/SOSTDC1/SOX15/SOX9/SRF/TBX2/TBX3/TCF7L2/TNF/TNFSF14/TRIP4/WNT10B/ZFP36L1	46
GO:0033157	BP	GO:0033157	regulation of intracellular protein transport	115/5894	264/18866	1.51e-05	0.000292049	0.000191788	ADIPOQ/AGTR2/AKAP5/AKAP8L/AKT2/ANGPT1/ARIH2/ATG13/BAD/BAG3/BAG4/BAP1/BARD1/BCAS3/BCL2/BMP4/BNIP3L/BRSK2/C2CD5/CABP1/CACNB3/CASP8/CD36/CDC42/CDH1/CDK5R1/CIB1/DERL2/DMTN/EDEM1/EMD/FLNA/FYN/FZD5/GAS6/GCC2/GSK3A/HAX1/HCLS1/HDAC3/HPCA/HRAS/HSPA1L/HUWE1/HYAL2/IFNG/IL1B/INPP5K/INSIG1/IPO5/JUP/KCNE1/KIF5B/LCP1/LEP/LMAN1/MAPK1/MAVS/MDM2/MFF/MYO1C/NDEL1/NF1/NUCB1/NUMA1/NUP54/OS9/PCNT/PDCD5/PDZK1/PIK3R2/PPM…	115
GO:0046330	BP	GO:0046330	positive regulation of JNK cascade	67/5894	138/18866	1.53e-05	0.000295203	0.000193859	AGER/ANKRD6/ARHGEF5/BIRC7/CCL21/CD40LG/CDC42/DKK1/EDA2R/EDAR/EDN1/EPHA4/ERCC6/ERN1/ERN2/F2RL1/FCGR2B/FGD2/FLT4/FZD10/FZD5/FZD7/GADD45A/HRAS/IL1B/LTBR/MAP2K7/MAP3K10/MAP3K12/MAP3K13/MAP3K2/MAP3K5/MAP3K6/MAP3K7/MAP4K5/MAPK8IP3/MINK1/MMP8/NCF1/NOD1/NOX1/PKN1/PLCB1/PTK2B/PTPN1/PYCARD/RB1CC1/ROR2/SDCBP/SEMA3A/SERPINF2/SLAMF1/SPAG9/SYK/TAOK1/TAOK2/TLR6/TNF/TNFSF11/TNIK/TRAF1/TRAF5/TRAF6/TRPV4/WNT16/WNT…	67
GO:0043254	BP	GO:0043254	regulation of protein-containing complex assembly	182/5894	449/18866	1.58e-05	0.000303598	0.000199371	ABL1/ACTR2/ACTR3/ADD2/ADD3/AIDA/ALOX15/ANKRA2/ANKRD27/ANKRD53/AP1AR/ARFIP2/ARHGAP28/ARHGEF2/ARHGEF5/ARL2/ARPC1A/ARPC4/ARPC5L/ARPIN/ATAT1/ATF7IP/ATM/BAG4/BAIAP2L2/BBS10/BBS4/BIN1/CAPG/CAPZA1/CAPZA2/CAV3/CCK/CCL11/CCL21/CCL24/CD36/CDC42/CDC42EP1/CDC42EP2/CDH17/CDH5/CDK5R1/CDK5RAP2/CDKN1B/CLASP1/CLEC7A/CORO1B/CREB1/CSF2/CSF3/CTNNA2/CUL4A/DBN1/DCTN1/DDB2/DDX3X/DKK1/DLG1/DMTN/DNAJC15/EIF4EBP1/ELN/EP30…	182
GO:0035850	BP	GO:0035850	epithelial cell differentiation involved in kidney development	29/5894	47/18866	1.59e-05	0.000304036	0.000199659	ADIPOQ/BMP4/CITED1/CTNNB1/FOXC2/FOXJ1/GATA3/GDNF/IQGAP1/JAG1/KLF15/LHX1/LIF/MAGI2/MTSS1/MYO1E/NOTCH1/NPHS1/NPHS2/PAX2/PAX8/PDGFB/PRKX/PTPRO/SALL1/SIX2/SMO/WT1/YAP1	29
GO:0060986	BP	GO:0060986	endocrine hormone secretion	29/5894	47/18866	1.59e-05	0.000304036	0.000199659	AGT/AGTR2/BMP6/C1QTNF1/C1QTNF3/CRH/CRHBP/CRHR1/FGFR1/GAL/GALR1/GATA3/GDF9/GJA1/GNAS/IL1B/INHA/KISS1/LEP/NPVF/POMC/PTPN11/RAB11FIP5/REN/RETN/SMAD4/TAC1/TBX3/TMF1	29
GO:0042098	BP	GO:0042098	T cell proliferation	89/5894	195/18866	1.6e-05	0.000304364	0.000199875	ABL1/AGER/AIF1/BMP4/BTN2A2/CASP3/CCL5/CCND3/CCR2/CD151/CD1D/CD209/CD28/CD3E/CD40LG/CD46/CD6/CD70/CRTAM/CTNNB1/DLG1/DLG5/DOCK2/EBI3/EPO/FKBP1B/FOXJ1/FOXP3/FYN/GLMN/GNRH1/HES1/HHLA2/HLA-DMB/HLA-DPA1/HLA-DPB1/HLA-E/IGFBP2/IL12B/IL12RB1/IL15/IL1B/IL21/IL23A/IL4/IL6/JAK3/LEP/LGALS9/LMO1/LRRC32/MALT1/NCK1/NCKAP1L/NDFIP1/P2RX7/PDCD1LG2/PIK3CG/PLA2G2D/PLA2G2F/PNP/PPP3CB/PRDX2/PRKCQ/PTPN22/PYCARD/RC3H1/RC…	89
GO:0070997	BP	GO:0070997	neuron death	150/5894	360/18866	1.62e-05	0.000307772	0.000202113	ABL1/ADNP/ADORA1/AGAP2/AKT2/AMBRA1/ANGPT1/APAF1/ASCL1/ATF2/ATF4/ATG7/ATM/ATN1/BACE1/BAD/BAG5/BCL2/BCL2L1/BDNF/CASP3/CASP8/CBL/CCL2/CCL5/CD200/CDC34/CDC42/CDK5R1/CHL1/CITED1/CLN3/CNTF/CNTFR/CREB1/CRLF1/CSF1/CSF3/CTNNB1/CX3CL1/DCC/DIO3/DKK1/DPYSL4/EFNB2/EGLN1/EGLN3/ENDOG/EPHA7/EPHB1/EPO/FASLG/FCGR2B/FGF20/FGF8/FOXB1/FYN/FZD9/GABRA5/GABRB2/GABRB3/GAPDH/GATA3/GDF5/GDNF/GPR75/GRIK2/GRIK5/GRIN1/GRIN2B/…	150
GO:1903039	BP	GO:1903039	positive regulation of leukocyte cell-cell adhesion	104/5894	235/18866	1.69e-05	0.000320364	0.000210382	AGER/AIF1/ALOX5/AP3D1/BAD/BTN2A2/CAV1/CCL2/CCL21/CCL5/CCR2/CD160/CD1D/CD209/CD28/CD3E/CD40LG/CD44/CD46/CD47/CD6/CD70/CD74/CDC42/CYLD/EBI3/EFNB2/EFNB3/EPO/ETS1/FLOT2/FOXP3/FUT4/FUT7/FYN/GATA3/GRAP2/GRB2/HES1/HHLA2/HLA-DMB/HLA-DPA1/HLA-DPB1/HLA-E/IFNG/IGFBP2/IL12B/IL12RB1/IL15/IL1B/IL21/IL23A/IL4/IL4R/IL6/IL7R/ITPKB/JAK3/LEP/LGALS9/MALT1/MAP3K8/MYB/NCK1/NCKAP1L/NFAT5/NLRP3/PAK3/PCK1/PDCD1/PDCD1LG2/…	104
GO:0007218	BP	GO:0007218	neuropeptide signaling pathway	54/5894	106/18866	1.81e-05	0.000342159	0.000224695	ADCYAP1/AGRP/CALCA/CARTPT/CYSLTR2/ECEL1/GAL/GALR1/GALR2/GLRA1/GLRA2/GLRA3/GLRB/GPR1/GPR143/GRPR/HCRTR1/HCRTR2/LTB4R/LTB4R2/MC2R/MCHR1/NPBWR2/NPFF/NPFFR1/NPPA/NPPB/NPVF/NPY2R/NPY5R/NPY6R/NTSR1/NTSR2/NXPH3/OPRK1/OPRL1/OPRM1/PCSK1N/PDYN/PENK/POMC/PPY/PTGDR2/PYY/SORCS3/SORL1/SSTR1/SSTR2/SSTR3/SSTR4/SSTR5/TAC1/TAC3/TENM1	54
GO:0098661	BP	GO:0098661	inorganic anion transmembrane transport	60/5894	121/18866	1.87e-05	0.000347791	0.000228393	ANKH/ANO2/ANO3/BEST1/BEST2/CASR/CLCA1/CLCA2/CLCC1/CLCN1/CLCN4/CLCN5/CLCN6/CLCNKB/CLIC1/CLIC2/FXYD3/GABRA1/GABRA2/GABRA3/GABRA4/GABRA5/GABRB1/GABRB2/GABRB3/GABRD/GABRG2/GABRG3/GABRQ/GABRR2/GLRA1/GLRA2/GLRA3/GLRB/GRM5/MTOR/PTAFR/SLC12A1/SLC12A2/SLC12A3/SLC12A4/SLC12A5/SLC13A1/SLC17A1/SLC17A7/SLC1A1/SLC1A3/SLC20A2/SLC25A10/SLC25A11/SLC25A30/SLC26A1/SLC26A10/SLC26A3/SLC26A4/SLC34A1/SLC37A4/SLC4A1/SLC…	60
GO:0007411	BP	GO:0007411	axon guidance	122/5894	284/18866	1.87e-05	0.000347791	0.000228393	ARHGAP35/ATOH1/BDNF/BMPR1B/BMPR2/CDH4/CDK5R1/CHL1/CNTN2/CNTN6/CSF1R/DAB1/DAG1/DCC/DOK1/DOK2/DOK5/DPYSL2/DSCAM/EFNA2/EFNA3/EFNB2/EFNB3/EPHA4/EPHA5/EPHA7/EPHB1/EPHB3/ETV1/FEZ2/FEZF2/FGF8/FLRT3/FOXG1/FRS2/FYN/FZD3/GAP43/GATA3/GBX1/GBX2/GDNF/GFRA2/GFRA3/GFRA4/GPC1/GRB2/IRS2/ISL1/KIF3A/KIF5A/KIF5B/L1CAM/LAMA1/LHX1/LHX3/LRP1/LRTM1/LYPLA2/MAPK1/MEGF8/NGFR/NKX2-1/NOTCH1/NOTCH3/NPTN/NRTN/NTN1/NTN3/NTRK1/O…	122
GO:0032370	BP	GO:0032370	positive regulation of lipid transport	39/5894	70/18866	1.87e-05	0.000347791	0.000228393	ABCA7/ABCB11/ABCB4/ADIPOQ/ATP8A2/AVPR1B/BMP6/C1QTNF1/CAV1/CETP/CRH/CYP19A1/CYP4A11/CYP4F2/EDN1/FABP3/GAL/GALR1/GPS2/IL1B/LPCAT3/LRP1/MAP2K6/MIF/MYB/NR1H2/NTSR1/OXT/P2RX7/PLA2G6/PLA2R1/PON1/PTCH1/RETN/SSTR4/TAC1/TMF1/TNFSF11/TRIAP1	39
GO:0050771	BP	GO:0050771	negative regulation of axonogenesis	39/5894	70/18866	1.87e-05	0.000347791	0.000228393	ARHGAP4/ARHGDIA/CDK5R1/CDKL3/DAB1/DCC/EFNB3/EPHA7/FGF13/FSTL4/IFRD1/KIAA0319/LRP4/MAG/MAP2/MCF2/MT3/NGFR/NTN1/PSEN1/PTEN/PTPRO/PTPRS/RNF6/RTN4/SEMA3A/SEMA3B/SEMA3D/SEMA4A/SEMA4G/SEMA6A/SEMA6B/SEMA6C/SEMA6D/SEMA7A/TNR/TRIM46/ULK2/WNT5A	39
GO:0050795	BP	GO:0050795	regulation of behavior	39/5894	70/18866	1.87e-05	0.000347791	0.000228393	ADORA1/ADRB1/AGRP/AHI1/CCK/CHRNB2/CRH/CSF2/DLG4/DRD2/DRD3/GHRH/GHRHR/GHSR/GJA1/HCRTR2/HDAC2/HDAC4/HOXA1/HTR1A/HTR1B/HTR1D/HTR2B/INS/INSL5/KCNA2/MC3R/MC4R/MTNR1B/MTOR/NPY2R/OPRL1/PENK/PER3/RETN/STAT3/TACR3/VPS35/ZFHX3	39
GO:0070371	BP	GO:0070371	ERK1 and ERK2 cascade	137/5894	325/18866	1.87e-05	0.000347791	0.000228393	ABCA7/ABL1/ADCYAP1/ADIPOQ/ADRA1A/AGER/AGT/ALOX15/ANGPT1/ATP6AP1/AVP/BMP2/BMP4/BTN2A2/C5AR2/CALCR/CASR/CCL1/CCL11/CCL13/CCL16/CCL2/CCL21/CCL23/CCL24/CCL25/CCL5/CD36/CD44/CD74/CHRNA10/CHRNA9/CIB1/CRKL/CRYBA1/CSF1R/CX3CL1/DLG1/DRD2/DSTYK/DUSP26/DUSP4/EGF/EIF3A/EMILIN1/EPHA7/EPHB1/EPO/ERBB4/F2RL1/FGB/FGF18/FGF20/FGF4/FGF8/FGFR2/FGFR3/FGFR4/FLT4/FRS2/FSHR/GAS6/GATA4/GCG/GCNT2/GNAI2/GPR183/GSTP1/HAND2/…	137
GO:0009612	BP	GO:0009612	response to mechanical stimulus	94/5894	209/18866	1.94e-05	0.000359027	0.000235772	ACTA1/AGT/ANKRD1/ANO3/ATP1A1/ATP8A2/BACE1/BAD/BAG3/BDKRB1/BMP6/CACNB3/CASP1/CASP5/CASP8/CAV3/CHRNA10/CHRNA9/CLCN6/CNN2/CSRP3/DAG1/DCN/DRD2/EDN1/ENDOG/ENG/ERCC8/ETS1/ETV1/FOSL1/FYN/GADD45A/GATA4/GDF5/GJA1/HDAC4/HPN/HTR2A/IGFBP2/IL13/IL1B/ITGA2/JUP/KCNA1/KCNC1/KCNJ2/KCNK2/KIAA0319/LTBR/MAG/MAP3K14/MAP3K2/MPO/NEUROG1/NFKB1/NPPA/NRXN2/NTRK1/P2RX3/P2RX7/P2RY1/PDZD7/PIEZO2/PKD2/PKD2L1/PKD2L2/PKDREJ/PPA…	94
GO:0009743	BP	GO:0009743	response to carbohydrate	103/5894	233/18866	1.96e-05	0.000361811	0.0002376	AACS/ACVR2B/ADCY8/ADIPOQ/ADNP/ADRA2A/AGER/APOA2/ATG7/BAD/BAIAP3/BRSK2/CALCRL/CASP3/CASR/CDK16/CDKN1B/CLEC7A/COLEC12/CPB2/CRH/CTSV/CYP7A1/EIF2B1/EIF2B2/EIF2B3/ENDOG/EPHA5/ERCC1/ERN1/FKBP1B/GAS6/GATA4/GCG/GCK/GHRHR/GIP/GIPR/GJA1/GPLD1/GPR27/GPR68/GRIK5/GSTP1/HMGN3/IL1B/IRS2/ITGA2/KAT7/KHK/KIF5B/LEP/LIN28A/LRP1/MAP2K6/MLXIPL/MPC2/NADK/NDUFA9/NKX2-2/NR1H4/OXT/P2RX3/PAX2/PCK1/PDK3/PDX1/PFKL/PIH1D1/PKL…	103
GO:0015850	BP	GO:0015850	organic hydroxy compound transport	116/5894	268/18866	1.97e-05	0.000362618	0.00023813	ABCA2/ABCA7/ABCB11/ABCB4/ABCC2/ABCC3/ACTB/ADIPOQ/ADRA2A/ADRA2B/ADRA2C/AGT/AGTR2/AKR1C4/APOA2/APOA4/APOC3/AQP2/ATP8B1/BMP6/C1QTNF1/CARTPT/CAV1/CD36/CEL/CETP/CHRM5/CHRNA6/CHRNB2/CRH/CRHR1/CYP19A1/DRD1/DRD2/DRD3/DRD4/EGF/FGF20/GAL/GALR1/GDNF/GHSR/GPS2/GRAMD1B/HRH3/HTR1A/HTR1B/HTR2A/ITGB3/KCNA2/KDM5B/LCAT/LDLR/LEP/LPCAT3/LRP1/LRP6/MECP2/MYB/NFKB1/NOS1/NPC1/NPC1L1/NPY2R/NR1H2/NR1H4/OSBP/OSBP2/OSBPL7/O…	116
GO:0031345	BP	GO:0031345	negative regulation of cell projection organization	86/5894	188/18866	1.98e-05	0.000363482	0.000238698	ARHGAP24/ARHGAP4/ARHGDIA/ARPIN/BAG5/BCL11A/CBFA2T2/CCL21/CDK5R1/CDKL3/CIB1/DAB1/DCC/DKK1/DNM2/DNM3/DPYSL3/EFNB2/EFNB3/EPHA4/EPHA7/FGF13/FKBP4/FSTL4/FYN/GFI1/GRIN2B/GSK3A/HDAC2/HRG/ID1/IFRD1/INPP5J/KIAA0319/LRIG2/LRP1/LRP4/MAG/MAK/MAP2/MAP4/MCF2/MDM2/MT3/MYLIP/NGFR/NLGN3/NTN1/PAFAH1B1/PAQR3/PLK2/PMP22/PPP3CA/PSEN1/PTEN/PTPRO/PTPRS/RAP1GAP/RAP1GAP2/RIT2/RNF6/RTN4/SEMA3A/SEMA3B/SEMA3D/SEMA4A/SEMA4G/…	86
GO:0032305	BP	GO:0032305	positive regulation of icosanoid secretion	14/5894	17/18866	2.03e-05	0.000370961	0.000243609	AVPR1B/CYP4A11/CYP4F2/EDN1/IL1B/MAP2K6/MIF/NTSR1/OXT/P2RX7/PLA2G6/PLA2R1/SSTR4/TNFSF11	14
GO:0007200	BP	GO:0007200	phospholipase C-activating G protein-coupled receptor signaling pathway	53/5894	104/18866	2.13e-05	0.000388169	0.000254909	ACTN2/ADRA1A/ADRA1B/ADRA2A/AGT/C5AR2/CALCA/CASR/CHRM2/DRD1/DRD2/DRD3/DRD5/EDN1/ESR1/F2/F2RL1/F2RL2/F2RL3/GALR2/GNA11/GNG13/GPR17/GPR20/GPR27/GPR32/GPR65/GRM1/GRM5/GRPR/HCRTR2/HTR2A/HTR2B/HTR2C/KISS1/LHCGR/LPAR3/LPAR4/LTB4R/MC3R/NMBR/NPR3/NTSR2/OPRK1/OPRL1/OPRM1/P2RY1/P2RY4/PLCE1/PTGER3/TGM2/TRHR/VIP	53
GO:0086001	BP	GO:0086001	cardiac muscle cell action potential	41/5894	75/18866	2.13e-05	0.000388169	0.000254909	ATP1A1/ATP2A2/BIN1/CACNA1C/CACNA1D/CACNA1G/CACNA2D1/CAV1/CAV3/CTNNA3/CXADR/DLG1/DSP/FGF12/FGF13/FLNA/GJA1/GJA5/HCN4/JUP/KCNE1/KCNE4/KCNIP2/KCNJ2/KCNJ3/KCNJ5/KCNJ8/KCNN2/NEDD4L/PKP2/RANGRF/SCN10A/SCN1A/SCN1B/SCN3B/SCN5A/SLC4A3/SLC8A1/SNTA1/TRPM4/YWHAE	41
GO:0033138	BP	GO:0033138	positive regulation of peptidyl-serine phosphorylation	55/5894	109/18866	2.17e-05	0.000393428	0.000258363	ANGPT1/ARAF/ATP2B4/AVP/BAG4/BCAR3/BCL2/BDNF/CALCR/CAV1/CD44/CREBL2/CSF3/GAS6/GCG/GSK3A/HAX1/HCLS1/HDAC6/IFNA1/IFNA10/IFNA14/IFNA16/IFNA17/IFNA2/IFNA4/IFNA5/IFNA7/IFNA8/IFNB1/IFNG/IFNW1/IL6/LATS1/LIF/MAPKAP1/MIF/NGF/NOS1/NTF3/OSM/PRKD1/PRKD2/PTGS2/RAMP3/RET/SH2D3A/SH2D3C/SNCA/SPRY2/STK4/TCL1B/TENM1/TNF/WNT5A	55
GO:0042446	BP	GO:0042446	hormone biosynthetic process	38/5894	68/18866	2.17e-05	0.000393428	0.000258363	AANAT/ADM/ARNT/ATP1A1/BMP2/BMP5/BMP6/CHST8/CYP11B1/CYP11B2/CYP17A1/CYP19A1/DGKQ/DIO3/FDX1/FDXR/FSHB/H6PD/HFE/HSD17B1/HSD17B11/HSD17B12/HSD17B14/HSD17B2/HSD17B3/HSD17B6/HSD17B7/HSD17B8/HSD3B1/HSD3B2/RDH8/REST/SRD5A2/SRD5A3/STAR/TG/TPO/WNT4	38
GO:0006090	BP	GO:0006090	pyruvate metabolic process	72/5894	152/18866	2.19e-05	0.00039434	0.000258962	AAAS/AGXT/ALDOA/ALDOC/ARNT/BPGM/CBFA2T3/DLAT/DLD/EIF6/ENO3/EP300/ESRRB/GAPDH/GAPDHS/GCK/GPD1/GPI/GSTZ1/HAGH/HDAC4/HKDC1/HTR2A/IFNG/INS/INSR/LDHAL6B/LDHC/ME2/ME3/MLXIPL/MPC2/MYOG/NUP188/NUP214/NUP54/NUP88/NUP98/NUPR1/OGDH/OGDHL/OGT/P2RX7/PCK1/PDHA1/PDHA2/PDHX/PDK3/PDPR/PFKFB1/PFKFB3/PFKFB4/PFKL/PFKP/PGAM1/PGK1/PGK2/PKLR/POM121/PPARA/PRKAA1/PRKAG2/PSEN1/RANBP2/SEC13/SEH1L/SIRT6/SLC16A8/SLC4A1/STAT3…	72
GO:0055078	BP	GO:0055078	sodium ion homeostasis	31/5894	52/18866	2.19e-05	0.000394395	0.000258998	ADORA1/AGT/AGTR2/ATP12A/ATP1A1/ATP6V1B1/AVP/AVPR1A/AVPR2/COMT/CORIN/CYP11B2/CYP4A11/CYP4F2/DRD2/DRD3/EDN1/GNAI2/MC3R/NEDD4L/NPPB/OXT/SCNN1G/SLC12A1/SLC12A2/SLC12A3/SLC8A1/SNX5/TAC1/TMPRSS3/UPK3A	31
GO:0030534	BP	GO:0030534	adult behavior	66/5894	137/18866	2.42e-05	0.000434005	0.00028501	ADAM2/ADAM22/AGRP/ARCN1/ASIP/ATP6V1B1/BBS4/BRS3/CARTPT/CEND1/CHD7/CHL1/CHRNA3/CHRNB1/CHRNB2/CHRNB4/CNP/CNTN2/CRHBP/DAB1/DBH/DRD1/DRD2/DRD3/DRD4/EFNB3/EPHA4/EPS8/FGF12/GABRG2/GBX1/GDNF/GHSR/GIP/GLRA1/GLRB/GRIN1/GRIN2D/HDAC2/HOXB8/HTR2A/ID2/KALRN/KCNJ10/LEP/MAFG/MECP2/NLGN3/NLGN4X/NPC1/NRXN2/NTAN1/NTSR1/OPRM1/PAFAH1B1/PPARA/PREX2/PTEN/SCN1A/SEZ6L/SHANK1/SLC1A2/SPTBN4/TSC1/ZFHX2/ZMPSTE24	66
GO:0071805	BP	GO:0071805	potassium ion transmembrane transport	97/5894	218/18866	2.45e-05	0.000439338	0.000288512	ABCB8/ABCC8/ABCC9/ACTN2/ATP12A/ATP1A1/BIN1/CACNA1D/CAV1/CAV3/CCDC51/CCT8L2/CD63/DLG1/DNM2/FLNA/FXYD2/GAL/GALR2/HCN4/HPN/KCNA1/KCNA10/KCNA2/KCNA3/KCNA4/KCNAB3/KCNB2/KCNC1/KCNC2/KCNC3/KCNC4/KCND1/KCNE1/KCNE4/KCNF1/KCNG1/KCNH1/KCNH4/KCNH6/KCNIP1/KCNIP2/KCNJ1/KCNJ10/KCNJ13/KCNJ14/KCNJ15/KCNJ16/KCNJ2/KCNJ3/KCNJ4/KCNJ5/KCNJ6/KCNJ8/KCNJ9/KCNK1/KCNK10/KCNK12/KCNK13/KCNK15/KCNK2/KCNMB2/KCNMB4/KCNN1/KCNN2/…	97
GO:0030217	BP	GO:0030217	T cell differentiation	110/5894	253/18866	2.52e-05	0.000450601	0.000295908	ABL1/AIRE/AP3D1/ATG5/BAD/BATF/BCL2/BMP4/BTN2A2/CAMK4/CCR2/CCR6/CCR9/CD1D/CD2/CD28/CD3D/CD3E/CD3G/CD46/CD74/CHD7/CLPTM1/CR1/CRTAM/CTNNB1/CYLD/CYP26B1/DOCK2/FOXJ1/FOXP3/FUT7/FZD5/FZD7/GATA3/GPR183/HLA-DOA/IFNA2/IFNB1/IFNG/IL12B/IL12RB1/IL15/IL18R1/IL1B/IL21/IL23A/IL4/IL4R/IL6/IL7R/IRF4/ITK/ITPKB/JAK3/JMJD6/KDELR1/LAG3/LEP/LFNG/LGALS9/LIG4/MALT1/MR1/MTOR/MYB/NCAPH2/NCKAP1L/NLRP3/PCK1/PKNOX1/PLA2G2D/…	110
GO:0050905	BP	GO:0050905	neuromuscular process	54/5894	107/18866	2.55e-05	0.000454383	0.000298392	ABL1/AGTPBP1/ATP8A2/BACE1/BCR/CAMTA1/CHRNA1/CHRND/CLN3/CNTNAP1/COMP/CTNNA2/DCTN1/DLG4/DRD1/DRD2/DRD3/FABP7/FGF12/GBX1/GCH1/GLRA1/GLRB/GM2A/GPR88/GRIN1/GRIN2A/GRIN2C/GRIN2D/HERC1/HOXA1/JPH3/KCNA1/KCNH1/MECP2/NEUROG1/NPAS1/OPA3/PAFAH1B1/PENK/POU4F2/POU4F3/PTEN/RAC3/RBFOX2/SCN1A/SHANK1/SLC1A3/SLC6A3/TCF15/TNR/TPP1/USH1C/ZMPSTE24	54
GO:0051402	BP	GO:0051402	neuron apoptotic process	107/5894	245/18866	2.57e-05	0.000456321	0.000299665	ADNP/AGAP2/AKT2/AMBRA1/ANGPT1/APAF1/ASCL1/ATF2/ATF4/ATM/ATN1/BACE1/BCL2/BCL2L1/BDNF/CASP3/CCL2/CDC34/CDC42/CDK5R1/CHL1/CITED1/CLN3/CNTF/CNTFR/CRLF1/CTNNB1/CX3CL1/DIO3/EGLN3/EPHA7/FASLG/FGF20/FGF8/FOXB1/FYN/FZD9/GABRA5/GABRB2/GABRB3/GAPDH/GATA3/GDF5/GDNF/GRIK2/GRIK5/GRIN1/GRM4/GSK3A/HDAC4/HRAS/HYOU1/ISL1/ITGA1/KRAS/LANCL1/LGMN/LIG4/LRP1/MAG/MAP3K12/MECP2/MT3/MTNR1B/MYB/NAIP/NES/NF1/NGF/NGFR/NLRP1/…	107
GO:0032872	BP	GO:0032872	regulation of stress-activated MAPK cascade	104/5894	237/18866	2.61e-05	0.000461499	0.000303065	AGER/AIDA/AMBP/ANKRD6/ARHGEF5/BIRC7/BMP2/CAV3/CCL21/CD40LG/CDC42/CYLD/DKK1/DLG1/EDA2R/EDAR/EDN1/EMC10/EPHA4/EPHB1/ERCC6/ERN1/ERN2/F2RL1/FCGR2B/FGD2/FKTN/FLT4/FOXO1/FZD10/FZD5/FZD7/GADD45A/GPS2/GRIK2/GSTP1/HAND2/HDAC3/HGF/HIPK3/HRAS/IL1B/IL26/LEP/LTBR/MAP2K7/MAP3K10/MAP3K12/MAP3K13/MAP3K2/MAP3K5/MAP3K6/MAP3K7/MAP4K4/MAP4K5/MAPK1/MAPK8IP2/MAPK8IP3/MID1/MINK1/MMP8/NCF1/NOD1/NOX1/NPPA/PAFAH1B1/PAGE4/…	104
GO:0042445	BP	GO:0042445	hormone metabolic process	98/5894	221/18866	2.64e-05	0.000466748	0.000306512	AANAT/ACE/ADH1A/ADH1C/ADM/AFP/AKR1B10/AKR1C4/AKR1D1/ALDH1A1/ALDH1A2/ALDH8A1/ARNT/ATP1A1/ATP6AP2/BMP2/BMP5/BMP6/CGA/CHST8/COMT/CORIN/CPA3/CRABP1/CRHBP/CYP11B1/CYP11B2/CYP17A1/CYP19A1/CYP1A2/CYP1B1/CYP26B1/CYP2W1/CYP46A1/DGKQ/DHRS2/DIO3/ECE2/ESR1/FDX1/FDXR/FOXA1/FSHB/GAL/GATA3/GCNT4/GHR/GHRHR/GNB3/H6PD/HFE/HPN/HSD17B1/HSD17B11/HSD17B12/HSD17B14/HSD17B2/HSD17B3/HSD17B6/HSD17B7/HSD17B8/HSD3B1/HSD3B2/…	98
GO:0070302	BP	GO:0070302	regulation of stress-activated protein kinase signaling cascade	105/5894	240/18866	2.79e-05	0.000490434	0.000322066	AGER/AIDA/AMBP/ANKRD6/ARHGEF5/BIRC7/BMP2/CAV3/CCL21/CD40LG/CDC42/CYLD/DKK1/DLG1/EDA2R/EDAR/EDN1/EMC10/EPHA4/EPHB1/ERCC6/ERN1/ERN2/F2RL1/FCGR2B/FGD2/FKTN/FLT4/FOXO1/FZD10/FZD5/FZD7/GADD45A/GPS2/GRIK2/GSTP1/HAND2/HDAC3/HGF/HIPK3/HRAS/IL1B/IL26/LEP/LTBR/MAP2K7/MAP3K10/MAP3K12/MAP3K13/MAP3K2/MAP3K5/MAP3K6/MAP3K7/MAP4K4/MAP4K5/MAPK1/MAPK8IP2/MAPK8IP3/MID1/MINK1/MMP8/NCF1/NOD1/NOX1/NPPA/PAFAH1B1/PAGE4/…	105
GO:0050432	BP	GO:0050432	catecholamine secretion	33/5894	57/18866	2.81e-05	0.000491758	0.000322936	ADRA2A/ADRA2B/ADRA2C/AGT/AGTR2/CARTPT/CHRNA6/CHRNB2/CRH/DRD2/DRD3/FGF20/GDNF/GHSR/HRH3/HTR1B/HTR2A/KCNA2/MECP2/NPY2R/OXT/OXTR/P2RY1/RAB3A/SNCA/SYT1/SYT11/SYT12/SYT13/SYT17/SYT2/SYT5/VIP	33
GO:0032228	BP	GO:0032228	regulation of synaptic transmission	GABAergic	23/5894	35/18866	2.81e-05	0.000491758	0.000322936	ADORA1/ADRA1A/BAIAP3/BDNF/CA2/CA7/CLN3/CNR2/DRD2/HAP1/HTR1B/KIF5B/KRAS/NF1/NPY5R/OXTR/PLCL1/PLCL2/PRKCE/PTEN/STXBP1/SYN3/TAC1	23
GO:0048469	BP	GO:0048469	cell maturation	82/5894	179/18866	2.86e-05	0.000500032	0.000328369	ABHD2/ACTL6B/ASCL1/B4GALT6/BCL11A/BCL2/BFSP1/BFSP2/BRD1/BTK/C1QL1/C3/CCL21/CCR6/CDKN1A/CEBPA/CLEC7A/CLN5/CNTN2/CTNNB1/CX3CL1/DAZL/DEFB1/DLD/DMC1/ELSPBP1/EPAS1/EPB42/EPO/ERCC2/FEM1B/FEV/FGFR1/FOXA1/FZD5/GATA3/GDF11/GHRHR/HES1/HOXA5/HOXB13/ID2/IL15/IL21/KCNIP2/LHX6/MAP3K13/MECP2/MTOR/NPPC/NPR2/PAEP/PDE3A/PGR/PICK1/PPARG/PPP2R1A/PRKACA/PTBP3/PTK2B/RAC3/RB1/REN/RET/RFX3/RND1/ROPN1B/RUNX2/SCARF1/SEMG1…	82
GO:0015800	BP	GO:0015800	acidic amino acid transport	39/5894	71/18866	2.9e-05	0.000505868	0.000332202	ADORA1/APBA1/AVP/AVPR1A/BDNF/CCK/GJA1/GLS2/GRM2/HRH3/KCNJ10/LRRC8E/NF1/NPY5R/NTSR1/P2RX7/PPFIA2/PPFIA3/PPFIA4/PRAF2/PSEN1/RAB3A/RAB3GAP1/SLC12A2/SLC17A6/SLC17A7/SLC1A1/SLC1A2/SLC1A3/SLC1A6/SLC1A7/SLC25A12/SLC38A2/SLC6A13/SLC6A6/SNAP25/STXBP1/SYT1/TRH	39
GO:0035813	BP	GO:0035813	regulation of renal sodium excretion	16/5894	21/18866	2.93e-05	0.000507849	0.000333503	ADORA1/AGT/AGTR2/AVP/AVPR1A/AVPR2/COMT/CORIN/DRD2/DRD3/EDN1/GNAI2/NPPB/OXT/SNX5/TAC1	16
GO:1900449	BP	GO:1900449	regulation of glutamate receptor signaling pathway	36/5894	64/18866	2.93e-05	0.000507849	0.000333503	ACTN2/ADRB2/ARC/CACNG2/CACNG3/CACNG4/CACNG5/CCL2/CCR2/CNIH3/CRH/CRHBP/CX3CL1/DAPK1/DLG1/DLG4/FYN/GRIA1/GRIA2/GRIA3/GRIA4/GRIN1/GRIN2A/GRIN2B/IFNG/MAPK8IP2/MINK1/NECAB2/NLGN3/OPRM1/PTK2B/RASGRF1/RGS9/SHANK1/SLC6A9/UNC13A	36
GO:0061138	BP	GO:0061138	morphogenesis of a branching epithelium	85/5894	187/18866	2.95e-05	0.000508124	0.000333683	ABL1/ADM/AGT/AGTR2/BCL2/BMP2/BMP4/CASR/CAV3/CCL11/CELSR1/CITED1/CSF1/CTNNB1/DAG1/DCHS1/DLG1/DLG5/EDN1/EGF/ENG/ESR1/EYA1/FEM1B/FGF1/FGF8/FGFR1/FGFR2/FOXA1/FOXC2/FRS2/FZD5/GBX2/GCM1/GDF2/GDNF/GNA13/GPC3/GRB2/GREB1L/GRHL2/HGF/HOXA5/HOXB13/KDM5B/KDR/KRAS/LAMA1/LHX1/LRP6/NKX2-1/NOTCH1/NOTCH4/PAX2/PAX8/PGR/PKD2/PROX1/PTCH1/RASIP1/RXRA/SALL1/SEMA3A/SHH/SIRT6/SIX2/SMAD4/SMO/SOX9/SPINT2/SPRY2/SRC/SRF/STK4…	85
GO:0001701	BP	GO:0001701	in utero embryonic development	157/5894	383/18866	2.95e-05	0.000508124	0.000333683	ACVR1B/ADAMTS3/ADCY9/ADM/AKAP3/AMOT/ANGPT1/ANKRD11/APBA1/APBA2/ARHGDIG/ARNT/ARNT2/ASCL2/ATP11A/B9D1/BCL2L1/BMP2/BMP5/BMPR1A/CASP8/CDX2/CEBPA/CHD7/CIR1/CITED1/CNOT2/COPS2/COPS3/CSF2/CTNNB1/CTR9/CUL4A/DAD1/DBN1/DHX35/DNAJB6/DSC3/E2F8/EDN1/EGLN1/EIF4E2/ELL/EMX1/ENDOG/EPAS1/EPB41L5/EPN1/ERCC2/ETNK2/FGFR1/FGFR2/FOSL1/FOXC1/FOXD3/FZD5/GABPA/GATA1/GATA3/GCM1/GDF3/GJB3/GNA13/GRB2/GRHL2/HAND1/HAND2/HEG1/H…	157
GO:0032386	BP	GO:0032386	regulation of intracellular transport	148/5894	358/18866	2.97e-05	0.000510185	0.000335037	AAAS/ABCA2/ACTN2/ADIPOQ/AGTR2/AKAP5/AKAP8L/AKT2/ANGPT1/ARIH2/ATG13/ATP2A1/BAD/BAG3/BAG4/BAP1/BARD1/BCAS3/BCL2/BMP4/BNIP3L/BRSK2/C2CD5/CABP1/CACNB3/CASP8/CD36/CDC42/CDH1/CDK5R1/CIB1/CRYAA/DERL2/DMTN/EDEM1/EHD1/EHD2/EMD/FLNA/FYN/FZD5/GAS6/GCC2/GSK3A/HAP1/HAX1/HCLS1/HDAC3/HPCA/HRAS/HSPA1L/HUWE1/HYAL2/IFNG/IL1B/INPP5K/INSIG1/IPO5/JUP/KCNE1/KIF5B/LAMP1/LCP1/LEP/LMAN1/MAP2/MAPK1/MAVS/MDM2/MFF/MLC1/MYBP…	148
GO:0040018	BP	GO:0040018	positive regulation of multicellular organism growth	22/5894	33/18866	3e-05	0.000512638	0.000336648	ATP8A2/BBS4/BCL2/CHD7/CREB1/CSF1/DIO3/DRD2/GH1/GHR/GHRH/GHRHR/GHSR/GPR21/NIPBL/POU1F1/POU3F2/SLC6A3/SMO/SPTBN4/STAT5B/VIL1	22
GO:0044070	BP	GO:0044070	regulation of anion transport	53/5894	105/18866	3e-05	0.000512638	0.000336648	ABCA7/ABCB11/ABCB4/ADORA1/AGT/AGTR2/AKT2/ATF4/ATP8A2/AVP/AVPR1A/AVPR1B/CA2/CA7/CCK/CETP/CYP4A11/CYP4F2/EDN1/FABP3/FGFR1/GRM5/HRH3/HTR1B/IL1B/IRS2/LEP/MAP2K6/MIF/MTOR/NPY5R/NTSR1/OXT/P2RX7/PDZK1/PLA2G6/PLA2R1/PRKG2/PSEN1/PTAFR/RAB11B/RAB3GAP1/RGS4/ROS1/SLC12A2/SLC34A1/SLC38A3/SSTR4/STXBP1/SYK/TNFSF11/TRH/TRIAP1	53
GO:0002088	BP	GO:0002088	lens development in camera-type eye	44/5894	83/18866	3.01e-05	0.000512638	0.000336648	ATF4/BCAR3/BFSP1/BFSP2/BMP4/CDKN1B/CDON/CRYBA1/CRYBA2/CRYBA4/CRYBB1/CRYBB2/CRYBB3/CRYGA/CRYGB/CRYGC/CRYGD/CTNNB1/DLG1/FOXE3/FRS2/FZR1/GATA3/GJA8/KDM5B/LIM2/MAF/MIP/PAX6/PDS5B/PITX3/PROX1/SHROOM2/SIX3/SIX5/SKI/SMAD3/SOX1/SPRY2/TDRD7/VIM/WNT2B/WNT5A/WNT7A	44
GO:0010226	BP	GO:0010226	response to lithium ion	17/5894	23/18866	3.18e-05	0.000536293	0.000352182	ACTA1/ADCY1/ADCY7/ASCL1/CDH1/CDKN1B/CEBPA/FABP4/GSK3A/ID2/IGFBP2/LIG4/MYOG/PKLR/PTGS2/PTK2B/SHH	17
GO:0033139	BP	GO:0033139	regulation of peptidyl-serine phosphorylation of STAT protein	17/5894	23/18866	3.18e-05	0.000536293	0.000352182	GADD45A/IFNA1/IFNA10/IFNA14/IFNA16/IFNA17/IFNA2/IFNA4/IFNA5/IFNA7/IFNA8/IFNB1/IFNG/IFNW1/LIF/PWP1/RET	17
GO:0035812	BP	GO:0035812	renal sodium excretion	17/5894	23/18866	3.18e-05	0.000536293	0.000352182	ADORA1/AGT/AGTR2/ATP6V1B1/AVP/AVPR1A/AVPR2/COMT/CORIN/DRD2/DRD3/EDN1/GNAI2/NPPB/OXT/SNX5/TAC1	17
GO:0032309	BP	GO:0032309	icosanoid secretion	28/5894	46/18866	3.19e-05	0.000536293	0.000352182	ACE/AGTR2/AVPR1B/CYP4A11/CYP4F2/DRD2/DRD3/DRD4/EDN1/IL1B/LEP/MAP2K6/MIF/NOS2/NTSR1/OXT/P2RX7/PLA2G2A/PLA2G2D/PLA2G2E/PLA2G2F/PLA2G3/PLA2G4A/PLA2G6/PLA2R1/SSTR4/SYK/TNFSF11	28
GO:2000142	BP	GO:2000142	regulation of DNA-templated transcription	initiation	28/5894	46/18866	3.19e-05	0.000536293	0.000352182	ATF7IP/BCLAF1/CREB1/CTNNB1/ERCC1/ERCC6/ESR1/FOSL1/HEY2/HNF1A/MED12/MED13/MED14/MED24/MED4/MORC1/NKX2-5/PSMC3/PSMC4/PSMC5/PSMC6/SETX/SRF/SUB1/THRA/TP53/WNT10B/ZNF451	28
GO:0070372	BP	GO:0070372	regulation of ERK1 and ERK2 cascade	129/5894	306/18866	3.22e-05	0.000537395	0.000352905	ABCA7/ABL1/ADCYAP1/ADIPOQ/ADRA1A/AGER/ALOX15/ANGPT1/ATP6AP1/BMP2/BMP4/BTN2A2/C5AR2/CALCR/CASR/CCL1/CCL11/CCL13/CCL16/CCL2/CCL21/CCL23/CCL24/CCL25/CCL5/CD36/CD44/CD74/CHRNA10/CHRNA9/CIB1/CRKL/CRYBA1/CSF1R/CX3CL1/DLG1/DRD2/DSTYK/DUSP26/DUSP4/EIF3A/EMILIN1/EPHA7/EPHB1/EPO/ERBB4/F2RL1/FGB/FGF18/FGF20/FGF4/FGF8/FGFR2/FGFR3/FGFR4/FLT4/FRS2/FSHR/GAS6/GATA4/GCG/GCNT2/GNAI2/GPR183/GSTP1/HAND2/HCRTR1/HRAS/…	129
GO:0050433	BP	GO:0050433	regulation of catecholamine secretion	32/5894	55/18866	3.23e-05	0.000537395	0.000352905	ADRA2A/ADRA2B/ADRA2C/AGT/AGTR2/CARTPT/CHRNA6/CHRNB2/CRH/DRD2/DRD3/FGF20/GDNF/GHSR/HRH3/HTR1B/HTR2A/KCNA2/NPY2R/OXT/OXTR/P2RY1/RAB3A/SNCA/SYT1/SYT11/SYT12/SYT13/SYT17/SYT2/SYT5/VIP	32
GO:0050879	BP	GO:0050879	multicellular organismal movement	32/5894	55/18866	3.23e-05	0.000537395	0.000352905	ASCL1/ATP2A1/ATP2A2/ATP8A2/CASQ1/CAV3/CHRNA1/CHRNB1/CHRND/CHUK/COMP/DRD3/EEF2/GSTM2/KCNJ2/MB/MTOR/MYH3/MYH7/MYH8/SCN4A/STAC/TCAP/TNNC1/TNNC2/TNNI1/TNNI2/TNNI3/TNNT1/TNNT3/VPS35/XRCC1	32
GO:0050881	BP	GO:0050881	musculoskeletal movement	32/5894	55/18866	3.23e-05	0.000537395	0.000352905	ASCL1/ATP2A1/ATP2A2/ATP8A2/CASQ1/CAV3/CHRNA1/CHRNB1/CHRND/CHUK/COMP/DRD3/EEF2/GSTM2/KCNJ2/MB/MTOR/MYH3/MYH7/MYH8/SCN4A/STAC/TCAP/TNNC1/TNNC2/TNNI1/TNNI2/TNNI3/TNNT1/TNNT3/VPS35/XRCC1	32
GO:0008306	BP	GO:0008306	associative learning	41/5894	76/18866	3.24e-05	0.000538306	0.000353504	ACTR2/ADAM2/AGT/ASIC1/CCK/CHRNB2/CLN3/CREB1/CRH/DBH/DDHD2/DRD1/DRD2/DRD3/DRD5/FOXB1/GABRA5/GRIN1/GRIN2A/HRH2/KRAS/LGMN/MECP2/MTOR/NDRG4/NEUROD2/NF1/NLGN3/NPTN/NPTX2/NRGN/OPRL1/PDE1B/RIN1/SHANK1/SNAP25/SRF/SYNPO/TAC1/TBR1/TNR	41
GO:0043112	BP	GO:0043112	receptor metabolic process	89/5894	198/18866	3.27e-05	0.00054181	0.000355805	ABCA2/ACHE/ADIPOQ/ADM/AHI1/ANGPT1/AP1AR/AP2A2/AP2S1/ARC/ARFGEF2/ARR3/ATXN2/BECN1/CACNG2/CACNG3/CACNG4/CACNG5/CALCRL/CALY/CAV1/CAV3/CD36/CD63/CD9/CLTA/CNTN2/CXCR1/DKK1/DLG4/DNM2/DNM3/DRD2/DRD3/DRD4/EDN1/EFNB2/EGF/FNTA/GRB2/GRIA1/GRK4/HDAC2/HDAC6/HOXA5/HPCA/HTR1B/HTR2B/IFNG/INSR/ITGB3/KIF16B/LGMN/LMTK2/LRP1/LRPAP1/LRRTM2/MAGI2/MKLN1/MYLIP/NECAB2/NEDD4/NTF3/OPHN1/PICALM/PICK1/PPARA/PPARG/PSEN1/PTPN1…	89
GO:0015874	BP	GO:0015874	norepinephrine transport	18/5894	25/18866	3.31e-05	0.00054682	0.000359095	ACTB/ADRA2A/ADRA2B/ADRA2C/AGT/AGTR2/CRH/GHSR/HRH3/OXT/OXTR/P2RY1/SLC22A1/SLC22A2/SLC22A3/SLC6A2/SLC6A3/SNCA	18
GO:0010771	BP	GO:0010771	negative regulation of cell morphogenesis involved in differentiation	50/5894	98/18866	3.46e-05	0.000570575	0.000374695	ACTN4/AP1AR/ARHGAP4/ARHGDIA/CDK5R1/CDKL3/DAB1/DCC/DMTN/DNM3/EFNB3/EPHA7/FGF13/FSTL4/ID1/IFRD1/KIAA0319/LRP4/MAG/MAP2/MCF2/MT3/NGFR/NLGN3/NTN1/PPP3CA/PSEN1/PTEN/PTPRO/PTPRS/RNF6/RTN4/SEMA3A/SEMA3B/SEMA3D/SEMA4A/SEMA4G/SEMA6A/SEMA6B/SEMA6C/SEMA6D/SEMA7A/TLX2/TNR/TRIM46/TRPC5/TRPC6/UBE3A/ULK2/WNT5A	50
GO:0009266	BP	GO:0009266	response to temperature stimulus	102/5894	233/18866	3.49e-05	0.00057164	0.000375394	AAAS/ABCC2/ADM/ADORA1/ADRB1/ADRB2/ANO3/APPL2/ARPP21/ATM/ATP2A2/ATXN3/BAG2/BAG3/BAG4/BAG5/CALCA/CAMK2A/CAMK2B/CASP8/CASQ1/CCAR2/CDH8/CDKN1A/CETN1/CPB2/CREBBP/DNAJA4/DNAJB4/DNAJB6/DNAJC3/DNAJC7/EIF2AK3/EIF2B1/EIF2B2/EIF2B3/EP300/EPHB1/FGF1/FGF16/FKBP4/FOXO1/GLRX2/GMPR/GRIK2/HDAC2/HSPA1L/HSPA6/HTR1B/HTR2A/HTR2B/IER5/LXN/MAP2K7/MAPK1/MICA/MSTN/MTOR/MYOF/NF1/NGFR/NOS1/NOS3/NTRK1/NTSR1/NUP188/NUP214/NU…	102
GO:0010976	BP	GO:0010976	positive regulation of neuron projection development	123/5894	290/18866	3.5e-05	0.00057164	0.000375394	ACTR2/ADCYAP1/ADNP/AGT/ANAPC2/ANKRD1/ANKRD27/APBB1/ARHGAP35/ARHGDIA/ATF1/ATP8A2/BDNF/BMP5/BMPR2/C21orf91/CAMK2B/CAPRIN1/CBFA2T2/CDH4/CDKL3/CDKL5/CNTF/CNTN1/CPNE6/CRTC1/CUL7/CUX2/CX3CL1/DBN1/DISC1/DLG4/DLG5/DNM1L/DPYSL3/DSCAM/EP300/EPHA4/EPO/FBXO31/FES/FGFR1/FKBP1B/FYN/GRIP1/HGF/IQGAP1/IST1/ITPKA/KALRN/KIDINS220/L1CAM/LLPH/LPAR3/LRP1/LTK/MAGI2/MAP3K13/MAPK6/MEGF8/METRN/MTOR/NCK1/NCKIPSD/NDEL1/NDRG…	123
GO:0060485	BP	GO:0060485	mesenchyme development	123/5894	290/18866	3.5e-05	0.00057164	0.000375394	ACTA1/ADAM15/ALDH1A2/ALX1/AMELX/ANXA6/BCL2/BMP2/BMP4/BMP5/BMPR1A/BMPR2/CER1/CLASP1/CTNNB1/CUL7/DAG1/DCHS1/DDX17/DLG5/DLL3/DPPA4/EDN1/ELL3/ENG/EPB41L5/ERBB4/FGF8/FGF9/FGFR1/FGFR2/FOXA1/FOXC1/FOXC2/FOXF2/FOXH1/FRZB/FUZ/GATA3/GATA4/GBX2/GCNT2/GDNF/HAND1/HAND2/HDAC2/HES1/HEY2/HEYL/HGF/HNRNPAB/HOXA5/HPN/HTR2B/IL1B/IL6/ISL1/JAG1/KITLG/KLHL12/LDLRAD4/LRP6/MAPK1/MDM2/MDM4/MEOX1/MSX1/MTOR/NEDD4/NKX2-1/NKX…	123
GO:0071248	BP	GO:0071248	cellular response to metal ion	87/5894	193/18866	3.5e-05	0.00057164	0.000375394	ADCY1/ADCY7/ADCY8/ALOX15/ALOX5AP/AOC1/AQP2/ATF4/BACE1/BMP6/CAPN3/CARF/CDH1/CDKN1B/CEBPA/CHUK/CPNE6/CPNE7/CREB1/CRHBP/CYP11B1/CYP11B2/CYP1A2/DLG4/DMTN/DPEP1/EDN1/EIF2AK3/ENDOG/FABP4/GLRA1/GLRA2/GPLD1/GSK3A/HFE/HPCA/ID2/IQGAP1/ITPKB/KCNA1/KCNH1/LGMN/LIG4/MAPK1/MAPK9/MCOLN1/MT1E/MT1F/MT1G/MT1H/MT1HL1/MT1M/MT1X/MT2A/MT3/MT4/MYOG/NCF1/NEUROD2/NFE2L2/NQO1/OGG1/PKD2/PPP5C/PRKAA1/PTGS2/RYR3/SCN5A/SHH/SLC…	87
GO:0001763	BP	GO:0001763	morphogenesis of a branching structure	90/5894	201/18866	3.54e-05	0.000576844	0.000378811	ABL1/ADM/AGT/AGTR2/BCL11A/BCL2/BMP2/BMP4/CASR/CAV3/CCL11/CELSR1/CITED1/CSF1/CTNNB1/DAG1/DCHS1/DLG1/DLG5/DRD2/EDN1/EGF/ENG/EPHA7/ESR1/EYA1/FEM1B/FGF1/FGF8/FGFR1/FGFR2/FOXA1/FOXC2/FRS2/FZD5/GBX2/GCM1/GDF2/GDNF/GNA13/GPC3/GRB2/GREB1L/GRHL2/HGF/HOXA5/HOXB13/KDM5B/KDR/KRAS/LAMA1/LHX1/LRP6/MAP3K13/NKX2-1/NOTCH1/NOTCH4/PAX2/PAX8/PGR/PKD2/PROX1/PTCH1/RASIP1/RTN4/RXRA/SALL1/SEMA3A/SHH/SIRT6/SIX2/SMAD4/SMO…	90
GO:0043949	BP	GO:0043949	regulation of cAMP-mediated signaling	31/5894	53/18866	3.7e-05	0.000601476	0.000394987	ADCYAP1/ADCYAP1R1/APLNR/APLP1/ATP2B4/CDC34/CRH/CRTC3/GIP/GIPR/GNAI1/GNAI2/GSK3A/MGRN1/NOS1/NPY2R/OPRL1/OPRM1/OR51E2/PDE10A/PDE11A/PDE3A/PDE3B/PDE4D/PEX5L/PRKAR1B/PRKCA/SCT/SCTR/SSTR4/TCP11	31
GO:0086003	BP	GO:0086003	cardiac muscle cell contraction	40/5894	74/18866	3.79e-05	0.000614174	0.000403326	ADORA1/ATP1A1/ATP2A1/ATP2A2/BIN1/CACNA1C/CACNA1D/CACNA1G/CACNA2D1/CAV1/CAV3/CTNNA3/DLG1/DSP/FGF12/FGF13/FLNA/GATA4/GJA1/GJA5/HCN4/JUP/KCNE1/KCNE4/KCNJ2/KCNJ3/KCNJ5/KCNJ8/KCNN2/NEDD4L/PDE4B/PDE4D/PKP2/RANGRF/SCN1A/SCN1B/SCN3B/SCN5A/SNTA1/TRPM4	40
GO:1903037	BP	GO:1903037	regulation of leukocyte cell-cell adhesion	137/5894	329/18866	3.82e-05	0.000616984	0.000405171	ADTRP/AGER/AIF1/ALOX5/AP3D1/ASS1/BAD/BMP4/BTN2A2/CASP3/CAV1/CCL2/CCL21/CCL25/CCL5/CCR2/CD160/CD1D/CD209/CD28/CD3E/CD40LG/CD44/CD46/CD47/CD6/CD70/CD74/CDC42/CRTAM/CYLD/DLG1/DLG5/EBI3/EFNB2/EFNB3/EPO/ETS1/FCGR2B/FGL1/FLOT2/FOXJ1/FOXP3/FUT4/FUT7/FYN/GATA3/GLMN/GNRH1/GRAP2/GRB2/HES1/HFE/HHLA2/HLA-DMB/HLA-DPA1/HLA-DPB1/HLA-E/IFNA2/IFNB1/IFNG/IGFBP2/IL12B/IL12RB1/IL15/IL1B/IL21/IL23A/IL4/IL4R/IL6/IL7R/…	137
GO:0010959	BP	GO:0010959	regulation of metal ion transport	161/5894	396/18866	3.94e-05	0.00063531	0.000417206	ABL1/ACTN2/ACTN4/ADCYAP1/ADCYAP1R1/ADORA1/ADRA2A/ADRB2/AGT/APLNR/ATF4/ATG5/ATP1A1/ATP2A1/ATP2B4/ATP2C2/BCL2/BDKRB1/BEST1/BIN1/BPIFA1/CACNA1B/CACNA1C/CACNA1D/CACNA2D1/CACNB1/CACNB3/CACNG1/CALCR/CAMK2A/CAMK2B/CAPN3/CASQ1/CASR/CAV1/CAV3/CCL2/CCL5/CD33/CD63/CHD7/CLIC2/CNTN1/CRH/CRHR1/CTNNB1/CX3CL1/DLG1/DNM2/DRD1/DRD2/DRD3/DRD4/DYSF/EGF/EPO/F2/F2RL3/FGF12/FGF13/FKBP1B/FLNA/FXYD2/FXYD3/FXYD5/FXYD6/FXYD…	161
GO:0060397	BP	GO:0060397	growth hormone receptor signaling pathway via JAK-STAT	12/5894	14/18866	3.96e-05	0.00063531	0.000417206	CSH1/GH1/GH2/GHR/JAK3/PRL/PRLR/PTPN1/STAT3/STAT5A/STAT5B/STAT6	12
GO:0072350	BP	GO:0072350	tricarboxylic acid metabolic process	12/5894	14/18866	3.96e-05	0.00063531	0.000417206	ACO1/ACO2/ASS1/GLUD1/IDH1/IDH2/IDH3A/IDH3B/IDH3G/IREB2/SIRT4/SLC34A1	12
GO:0019827	BP	GO:0019827	stem cell population maintenance	75/5894	162/18866	3.97e-05	0.000635449	0.000417297	ARID1A/ASCL2/BCL9/BMPR1A/CDC73/CDH2/CDX2/CNOT2/CTNNB1/CTR9/CUL4A/DDX6/DPPA4/EIF4ENIF1/ELF5/ESRRB/FANCC/FGF4/FOXD3/FOXO1/FZD7/HES1/JAG1/KDM3A/KDM4C/LIF/LIG4/LIN28A/LSM1/MCPH1/MED12/MED14/MED15/MED27/MED28/NANOG/NCOA3/NIPBL/NOTCH1/NR2E1/PADI4/PAF1/PAX2/PAX8/PELO/POLR2A/POLR2E/POLR2I/PRDM14/PRDM16/PROX1/RBPJ/REST/RTF1/SALL1/SETD6/SIX2/SKI/SMAD2/SMAD4/SMC3/SMO/SOX2/SOX9/SS18/STAT3/TAF6L/TAL1/TBX3/TRI…	75
GO:0001709	BP	GO:0001709	cell fate determination	26/5894	42/18866	4.02e-05	0.000641434	0.000421227	ASCL1/ATOH1/BMP4/CDC42/CTNNB1/CYP26B1/EBF2/FEZF2/FOXG1/GATA3/HES1/IFRD1/ISL1/JAG1/LBX1/MYOD1/NKX2-2/NOTCH4/PAX2/PAX6/PROX1/PTCH1/PTCH2/TBX2/WNT1/WNT7A	26
GO:0008406	BP	GO:0008406	gonad development	98/5894	223/18866	4.09e-05	0.000650936	0.000427467	ADAM15/ADAM20/ADAM21/ADCYAP1/AFP/AMHR2/ARID4B/ATM/ATRX/BCL2/BCL2L1/BMPR1B/CASP3/CBL/CCND1/CRKL/CTSV/CYP19A1/DMC1/DMRT1/EIF2B2/ERCC1/ESR1/FGF8/FGF9/FLNA/FNDC3A/FOXC1/FSHB/FSHR/GATA1/GATA3/GATA4/GDF9/GNRH1/HMGCS1/HYAL3/IDH1/ING2/INHA/INSR/KDM5A/KITLG/KMT2B/LEP/LFNG/LHCGR/LRP2/LRRC6/MAMLD1/MSH4/NKX2-1/NOS3/NR0B1/NR5A1/NRIP1/NTRK1/NUPR1/PCYT1B/PGR/PLEKHA1/PRKACG/PTX3/RAB13/RAD21L1/RARA/REN/RETN/RHOBT…	98
GO:0034284	BP	GO:0034284	response to monosaccharide	92/5894	207/18866	4.13e-05	0.000656248	0.000430956	AACS/ACVR2B/ADCY8/ADIPOQ/ADRA2A/AGER/APOA2/ATG7/BAD/BAIAP3/BRSK2/CASP3/CASR/CDK16/CDKN1B/CPB2/CRH/CTSV/CYP7A1/EIF2B1/EIF2B2/EIF2B3/ENDOG/EPHA5/ERN1/FKBP1B/GAS6/GATA4/GCG/GCK/GHRHR/GIP/GIPR/GJA1/GPLD1/GPR27/GPR68/GRIK5/GSTP1/HMGN3/IRS2/ITGA2/KHK/KIF5B/LEP/LIN28A/LRP1/MLXIPL/MPC2/NADK/NDUFA9/NKX2-2/NR1H4/PAX2/PCK1/PDK3/PDX1/PFKL/PIH1D1/PKLR/PLA2G6/POLG/PPARD/PPP3CA/PPP3CB/PRKAA1/PRKACA/PRKCE/PRLH/P…	92
GO:0018205	BP	GO:0018205	peptidyl-lysine modification	164/5894	405/18866	4.32e-05	0.000684229	0.000449331	AAAS/ACTL6B/APBB1/ARID4B/ARNT/ASH1L/ASH2L/ATAT1/ATF2/ATG5/ATRX/BAG6/BCL11A/BRD1/BRD7/BRD8/BRPF1/CAMKMT/CAPN3/CBX4/CDY1/CHD5/CREBBP/CTBP1/CTH/CTNNB1/CTR9/CXXC1/DOHH/DOT1L/DPF3/DR1/EHMT1/EHMT2/EID1/EP300/EP400/EYA1/FOXP3/GATA3/GCG/GFI1/GLYR1/HDAC2/HDAC4/HDAC6/HDAC9/HMG20A/IL1B/ING3/ING4/IRF4/ISL1/JADE3/JARID2/JMJD6/KANSL3/KAT5/KAT6A/KAT7/KAT8/KDM3A/KDM4C/KDM4D/KLF15/KMT2A/KMT2B/KMT2D/LIF/LIPT1/MAP3…	164
GO:0051896	BP	GO:0051896	regulation of protein kinase B signaling	109/5894	253/18866	4.37e-05	0.000690101	0.000453187	ANGPT1/BAG4/BTN2A2/C1QBP/C1QTNF1/CALCR/CAV3/CCL21/CD28/CIB1/CRYBA1/CSF3/CX3CL1/DAG1/DLG1/DRD2/DRD3/EGF/ENG/ERBB4/ESR1/F3/F7/FGF1/FGF16/FGF17/FGF18/FGF20/FGF22/FGF3/FGF4/FGF5/FGF6/FGF8/FGF9/FGFR1/FGFR2/FGFR3/FGFR4/FRS2/FYN/GAS6/GATA3/GATA4/GCNT2/GDF15/GPX1/GRB2/GRM2/HAX1/HCLS1/HGF/HYAL2/IAPP/IGFBP5/IL26/INPP5K/INS/INSR/IRS2/KITLG/LEP/LIN28A/LRP2/MAGI2/MST1R/MSTN/MTM1/MTOR/NTRK1/OSM/OTUD3/PDCD6/PDG…	109
GO:0021543	BP	GO:0021543	pallium development	79/5894	173/18866	4.55e-05	0.000716798	0.000470719	ASCL1/ATAT1/ATOH1/ATP2B4/BAD/BBS4/BCAN/BTBD3/CASP3/CCDC85C/CDH2/CDK5R1/CDK5R2/CDON/CRK/CRKL/CTNNB1/DAB1/DCLK2/DISC1/DRD1/EFHC1/EIF2B3/EMX1/EMX2/EPHA5/FEZF2/FGF13/FGF8/FLNA/FOXG1/GRIN1/HSD3B1/HSD3B2/HTR5A/HTR6/KCNA1/KDM6B/KIF5B/LHX5/LHX6/LRP1/LRP6/MBOAT7/MCPH1/NDEL1/NEUROD6/NF1/NKX2-1/NR2E1/PAFAH1B1/PAX6/PHACTR1/PHLPP2/PLCB1/POU3F2/POU3F3/PROX1/PSEN1/PTEN/PTPRS/RARA/ROBO1/RTN4/SCT/SLC38A2/SMO/SRF/…	79
GO:0046777	BP	GO:0046777	protein autophosphorylation	103/5894	237/18866	4.58e-05	0.000720703	0.000473283	AATK/ABL1/ACE/ACVR1B/ADIPOQ/ATM/BCR/BTK/CAMK2A/CAMK2B/CAMK4/CAV1/CDKL5/CLK1/CLK3/CLK4/CSF1R/DAPK1/DAPK2/DDX3X/DYRK1B/EIF2AK3/ENG/EPHA4/EPHA7/EPHB1/EPHB3/ERBB4/ERN1/FES/FGFR1/FGFR2/FGFR3/FGFR4/FGR/FLT1/FLT3/FLT4/FRK/FYN/GFRA2/GRK1/GRK5/IMPACT/INS/INSR/INSRR/IQGAP1/IRAK3/ITK/KDR/LMTK2/MAK/MAP3K10/MAP3K12/MAP3K13/MINK1/MKNK1/MTOR/MUSK/MVP/MYO3A/NTRK1/PASK/PDGFB/PDGFD/PEAK1/PPP2R5B/PPP2R5C/PPP2R5D/PP…	103
GO:0050920	BP	GO:0050920	regulation of chemotaxis	100/5894	229/18866	4.67e-05	0.000732305	0.000480902	AGER/AIF1/AKIRIN1/BMPR2/BST1/C1QBP/C5/C5AR2/CASR/CCL1/CCL2/CCL21/CCL27/CCL5/CCR2/CCR4/CCR6/CD74/CORO1B/CREB3/CSF1/CSF1R/CYP19A1/DAPK2/DNM1L/DSCAM/DYSF/EDN1/EFNB2/F2RL1/F3/F7/FEZF2/FGF1/FGF16/FGF18/FGF4/FGFR1/GAS6/GPR183/GSTP1/HRG/IL23A/IL4/IL6/IL6R/ITGA2/KDR/LBP/LGALS9/LGMN/MAPK1/MEGF8/MIF/MMP28/MPP1/MST1/MSTN/MTUS1/NCKAP1L/NOTCH1/NTF3/PADI2/PDGFB/PDGFD/POU4F2/PPM1F/PRKD1/PRKD2/PTK2B/PTPRO/RAC1/R…	100
GO:0046031	BP	GO:0046031	ADP metabolic process	60/5894	124/18866	4.72e-05	0.000738379	0.000484891	AAAS/AK1/AK5/ALDOA/ALDOC/AMPD3/ARNT/BAD/BPGM/CBFA2T3/EIF6/ENO3/EP300/ESRRB/GAPDH/GAPDHS/GCK/GPD1/GPI/HDAC4/HKDC1/HTR2A/IFNG/INS/INSR/MLXIPL/MYOG/NUDT9/NUP188/NUP214/NUP54/NUP88/NUP98/NUPR1/OGDH/OGDHL/OGT/P2RX7/PFKFB1/PFKFB3/PFKFB4/PFKL/PFKP/PGAM1/PGK1/PGK2/PKLR/POM121/PPARA/PRKAA1/PRKAG2/PSEN1/RANBP2/SEC13/SEH1L/SIRT6/SLC4A1/STAT3/TPI1/TPR	60
GO:0032944	BP	GO:0032944	regulation of mononuclear cell proliferation	97/5894	221/18866	4.73e-05	0.000739075	0.000485348	AGER/AIF1/ATM/BCL2/BMP4/BST1/BTK/BTN2A2/CASP3/CCL5/CCR2/CD1D/CD209/CD28/CD3E/CD40LG/CD46/CD6/CD70/CD74/CDKN1A/CHRNB2/CRP/CRTAM/CSF1/CTNNB1/DLG1/DLG5/EBI3/EPO/FCGR2B/FLT3LG/FOXJ1/FOXP3/GAL/GLMN/GNRH1/GPR183/HES1/HHLA2/HLA-DMB/HLA-DPA1/HLA-DPB1/HLA-E/IGFBP2/IKZF3/IL12B/IL12RB1/IL13/IL15/IL1B/IL21/IL23A/IL4/IL5/IL6/IRS2/JAK3/LEP/LGALS9/LMO1/LRRC32/LST1/MIF/NCK1/NCKAP1L/NDFIP1/PDCD1LG2/PKN1/PLA2G2D/P…	97
GO:0120178	BP	GO:0120178	steroid hormone biosynthetic process	29/5894	49/18866	4.85e-05	0.000756047	0.000496494	ADM/BMP2/BMP5/BMP6/CYP11B1/CYP11B2/CYP17A1/CYP19A1/DGKQ/FDX1/FDXR/FSHB/HSD17B1/HSD17B11/HSD17B12/HSD17B14/HSD17B2/HSD17B3/HSD17B6/HSD17B7/HSD17B8/HSD3B1/HSD3B2/RDH8/REST/SRD5A2/SRD5A3/STAR/WNT4	29
GO:0070663	BP	GO:0070663	regulation of leukocyte proliferation	104/5894	240/18866	4.87e-05	0.000756876	0.000497038	AGER/AIF1/ATM/BCL2/BMP4/BST1/BTK/BTN2A2/CASP3/CCL5/CCR2/CD1D/CD209/CD28/CD3E/CD40LG/CD46/CD6/CD70/CD74/CDKN1A/CHRNB2/CRP/CRTAM/CSF1/CSF1R/CTNNB1/DLG1/DLG5/EBI3/EPO/FCGR2B/FLT3LG/FOXJ1/FOXP3/GAL/GLMN/GNRH1/GPR183/GSTP1/HES1/HHEX/HHLA2/HLA-DMB/HLA-DPA1/HLA-DPB1/HLA-E/IGFBP2/IKZF3/IL12B/IL12RB1/IL13/IL15/IL1B/IL21/IL23A/IL4/IL5/IL5RA/IL6/IRS2/JAK3/KITLG/LEP/LGALS9/LMO1/LRRC32/LST1/MAPK1/MIF/NCK1/NCK…	104
GO:0098693	BP	GO:0098693	regulation of synaptic vesicle cycle	56/5894	114/18866	4.89e-05	0.000757631	0.000497534	ADCY1/ADRA1A/APBA1/APBA2/ATP2A2/BACE1/BRSK2/BSN/CACNA1D/CDH2/CDK5R1/CHRM2/CHRNA6/CHRNB2/CHRNB3/CPLX2/CPLX3/CSPG5/DGKQ/DNM1L/DNM3/DRD1/DRD2/GRIK5/HTR1B/HTR2A/MAGI2/NCS1/NLGN3/P2RY1/P2RY4/PLAA/PPFIA2/PPP3CB/PREPL/PRKAR1B/PRKCG/PTEN/RAB3A/RAB3B/RAB3GAP1/RAPGEF4/RIMS3/SLC17A7/SLC2A4/SLC4A8/SNCA/STXBP1/STXBP5L/SYN1/SYP/SYT1/SYT11/TOR1A/VAMP4/WNT7A	56
GO:0050773	BP	GO:0050773	regulation of dendrite development	72/5894	155/18866	4.9e-05	0.000757631	0.000497534	ACTR2/ANAPC2/ANKRD27/ARC/ARHGAP33/BCL11A/BMP5/C21orf91/CAMK2B/CAPRIN1/CDK5R1/CDKL3/CDKL5/CHRNA3/CHRNB2/CRK/CRKL/CRTC1/CUL7/CUX2/DBN1/DCC/DISC1/DLG5/DNM1L/DNM3/EPHA4/FBXO31/FSTL4/GRIN1/GSK3A/HDAC2/HECW1/ID1/IQGAP1/ITPKA/KALRN/KIAA0319/KIF1A/LLPH/MAPK6/MTOR/NEDD4/NEDD4L/NEURL1/NEUROG3/NLGN3/NR2E1/OBSL1/PAFAH1B1/PAK3/PARP6/PLK2/PPFIA2/PPP3CA/PQBP1/PSEN1/PTEN/PTPRD/PTPRS/RAB21/SHANK1/SIPA1L1/STK11/TL…	72
GO:0007159	BP	GO:0007159	leukocyte cell-cell adhesion	149/5894	364/18866	5.05e-05	0.00077867	0.00051135	ADD2/ADTRP/AGER/AIF1/ALOX5/AP3D1/APOA4/ASS1/BAD/BMP4/BTN2A2/CASP3/CAV1/CCL2/CCL21/CCL25/CCL5/CCR2/CD160/CD177/CD1D/CD209/CD28/CD3E/CD40LG/CD44/CD46/CD47/CD6/CD70/CD74/CDC42/CLEC4M/CRTAM/CYLD/DLG1/DLG5/EBI3/EFNB2/EFNB3/EPO/ETS1/FCGR2B/FGL1/FLOT2/FOXJ1/FOXP3/FUT4/FUT7/FYN/GATA3/GCNT1/GLMN/GNRH1/GOLPH3/GRAP2/GRB2/HES1/HFE/HHLA2/HLA-DMB/HLA-DPA1/HLA-DPB1/HLA-E/IFNA2/IFNB1/IFNG/IGFBP2/IL12B/IL12RB1/IL…	149
GO:2000027	BP	GO:2000027	regulation of animal organ morphogenesis	109/5894	254/18866	5.32e-05	0.000818972	0.000537816	ABL1/AGT/AGTR2/AHI1/AJAP1/AMELX/ANKRD6/AP2A2/AP2S1/BCL2/BDNF/BMP10/BMP2/BMP4/BMPR1A/BMPR2/CAV3/CDC42/CELSR1/CELSR2/CHAD/CITED1/CNTF/CPB2/CSF1/CTNNB1/DIO3/DKK1/DMP1/EDN1/ENG/ESR1/EYA1/FGF1/FGF8/FGFR1/FGFR2/FOXC1/FOXC2/FRS2/FZD3/FZD5/FZD7/GATA3/GDNF/GPC3/GPC4/HAND2/HES1/HGF/HPN/ISL1/JAG1/LHX1/LIF/MAGI2/MED12/MLLT3/MMP20/MSX1/NGFR/NOTCH1/PARD6A/PAX2/PAX8/PFN1/PLEKHA4/PSMA5/PSMB6/PSMB7/PSMC3/PSMC4/PS…	109
GO:0051262	BP	GO:0051262	protein tetramerization	45/5894	87/18866	5.45e-05	0.000834099	0.00054775	ALDH1A2/ALDOA/APPL2/AQP2/AQP4/CBY1/CRTC1/CRTC3/CRYZ/CTH/CUTC/GNMT/GRIN1/GRIN2B/HSD17B10/HSD17B8/KCNC1/KCNC3/KCNJ2/KIF25/KRT1/MAT1A/MCOLN1/MIP/PFKL/PFKP/PKD2/PKD2L1/RYR3/SAMHD1/SHMT1/SNCA/SYCP1/THG1L/TP53/TP73/TRPA1/TRPM1/TRPM2/TRPM3/TRPM4/TRPM6/TRPV5/UPB1/VASP	45
GO:0060291	BP	GO:0060291	long-term synaptic potentiation	45/5894	87/18866	5.45e-05	0.000834099	0.00054775	ABL1/ADCY1/ADCY8/ADORA1/AGER/AKAP5/ARC/CREB1/CRH/CRHR2/CRTC1/CYP46A1/DRD1/DRD2/EPHA4/GIP/GRIN2A/GRIN2B/GRIN2C/GRIN2D/INS/LGMN/LRRTM2/MAPK1/MECP2/MPP2/NF1/NLGN3/NPTN/NR2E1/NRGN/PLK2/PRKCZ/PTEN/PTK2B/SCGN/SHANK1/SLC24A1/SLC24A2/SNAP25/SQSTM1/STX3/STX4/SYT12/TNR	45
GO:0043368	BP	GO:0043368	positive T cell selection	23/5894	36/18866	5.48e-05	0.000835112	0.000548415	BATF/BCL2/CD3D/CD3E/CD3G/CD74/CYLD/DOCK2/FOXP3/IL12B/IL12RB1/IL23A/IL6/IRF4/ITPKB/MTOR/SHH/SPN/SRF/STAT3/STAT6/STK11/TBX21	23
GO:2000310	BP	GO:2000310	regulation of NMDA receptor activity	23/5894	36/18866	5.48e-05	0.000835112	0.000548415	ACTN2/CCL2/CCR2/CRH/CRHBP/DAPK1/DLG1/DLG4/GRIA1/GRIA2/GRIA3/GRIA4/GRIN1/GRIN2A/GRIN2B/IFNG/MAPK8IP2/NLGN3/OPRM1/PTK2B/RASGRF1/RGS9/SLC6A9	23
GO:0048639	BP	GO:0048639	positive regulation of developmental growth	84/5894	187/18866	5.52e-05	0.000839046	0.000550998	ADNP/ANAPC2/ATP8A2/BBS4/BCL2/BDNF/BMP10/BMPR1A/BMPR2/CAPN3/CDH4/CDKL5/CHD7/CPNE6/CREB1/CSF1/DBN1/DIO3/DISC1/DRD2/DSCAM/EDN1/ERBB4/FGF8/FGF9/FGFR1/FGFR2/GH1/GHR/GHRH/GHRHR/GHSR/GPR21/HEY2/INSR/IST1/L1CAM/LEP/LPAR3/LRP1/MAP3K13/MAPK1/MEGF8/MTM1/MTOR/MYOD1/NDEL1/NEDD4L/NGF/NIPBL/NOTCH1/NTN1/PAFAH1B1/PIN1/PLAA/PLCB1/POU1F1/POU3F2/POU4F2/PPARD/PROX1/RAG2/RBPJ/RND2/SEMA7A/SLC6A3/SMO/SMURF1/SOX15/SPTBN4…	84
GO:0046677	BP	GO:0046677	response to antibiotic	28/5894	47/18866	5.54e-05	0.000840419	0.0005519	ACTR2/ALPL/AOC1/CASP3/CASP8/CBL/CCR4/CDKN1B/CIITA/CRIP1/CYB5R4/EHMT1/ENDOG/HYAL1/HYAL2/HYAL3/ID1/JAK1/KAT7/KDM5B/KDM6B/MDM2/PLA2G4A/SLC1A3/SOD1/STAR/TP53/UROS	28
GO:0009953	BP	GO:0009953	dorsal/ventral pattern formation	47/5894	92/18866	5.63e-05	0.000852418	0.00055978	AIDA/ASCL1/BMP4/BMPR1A/BMPR1B/CER1/CHRD/CTNNB1/CXXC4/DYNC2H1/EDN1/EVX1/FBXL15/FGF8/FOXA1/FOXG1/GPR161/HOXB2/IFT122/LHX1/LHX3/LMX1B/LRP4/MDFI/NKX2-1/NKX2-2/OVOL2/PAX6/PAX7/PRKACA/PROP1/PSEN1/PTCH1/RFX4/SHH/SIX3/SMAD2/SMAD6/SMO/SOSTDC1/SOX1/TCTN1/TRAF3IP1/VAX2/WDR19/WNT7A/WNT8B	47
GO:1901216	BP	GO:1901216	positive regulation of neuron death	49/5894	97/18866	5.75e-05	0.000868064	0.000570054	ABL1/ADORA1/ASCL1/ATF2/ATF4/ATM/BACE1/BAD/CASP3/CASP8/CDC34/CDC42/CDK5R1/CTNNB1/DKK1/EFNB2/EPHA7/FASLG/FCGR2B/FYN/GRIK2/GRIK5/GRIN2B/GSK3A/HDAC4/IFNG/ITGA1/MAP3K5/MTOR/MYB/NF1/NQO1/NQO2/NUPR1/PAK3/PICALM/PIN1/PITX3/RAPSN/REST/SNCA/TFAP2A/TGFB2/TLR6/TNF/TP53/TP53BP2/UBE2M/WNT5A	49
GO:0010469	BP	GO:0010469	regulation of signaling receptor activity	79/5894	174/18866	5.8e-05	0.000872203	0.000572773	ACTN2/ADORA1/ADRA2A/ADRA2B/ADRA2C/ADRB2/AGTR2/ARC/BEGAIN/CACNG2/CACNG3/CACNG4/CACNG5/CALCR/CAV3/CBL/CBLC/CCL2/CCR2/CGA/CHMP6/CNIH3/CRH/CRHBP/DAPK1/DKK1/DKKL1/DLG1/DLG4/DLGAP1/DLGAP2/DLGAP4/EGF/ESR2/FCGR2B/FNTA/FSHB/GPRC5A/GRIA1/GRIA2/GRIA3/GRIA4/GRIN1/GRIN2A/GRIN2B/HFE/IFNG/IL18BP/LRPAP1/LY6H/MAPK8IP2/MINK1/MUC4/NCF1/NCOA3/NEURL1/NLGN3/NPTX1/NPTX2/NPTXR/OPRM1/P2RY1/PDE4D/PHLDA2/PPP2R5B/PSEN1/PTEN…	79
GO:0015718	BP	GO:0015718	monocarboxylic acid transport	79/5894	174/18866	5.8e-05	0.000872203	0.000572773	ABCB11/ABCB4/ABCC2/ABCC3/ABCD1/ABCD2/ABCD4/ABCG2/ACE/ACSL1/AGTR2/AKR1C4/AKT2/APBA1/ATP8B1/AVPR1B/CASR/CD36/CPT1A/CYP4A11/CYP4F2/DRD2/DRD3/DRD4/EDN1/FABP1/FABP3/FABP4/FABP5/HTR1B/IL1B/IRS2/LEP/MAP2K6/MID1IP1/MIF/MPC2/NF1/NOS2/NR1H4/NTSR1/OXT/P2RX7/PLA2G2A/PLA2G2D/PLA2G2E/PLA2G2F/PLA2G3/PLA2G4A/PLA2G6/PLA2R1/PPARA/PPARD/PPARG/PRKAG2/RPS6KB1/RXRA/SLC10A1/SLC10A2/SLC16A2/SLC16A5/SLC16A8/SLC22A13/SLC2…	79
GO:0071496	BP	GO:0071496	cellular response to external stimulus	135/5894	326/18866	5.91e-05	0.000885707	0.000581641	ADNP/AGT/AIF1/ALB/AMBRA1/ANKRD1/AOC1/AQP2/ARHGAP35/ASGR1/ATF4/ATG14/ATG5/ATG7/ATP1A1/AVPR1A/BAD/BAG3/BCL2/BECN1/BMP6/BMPR2/BRSK2/CACNB3/CADPS2/CARTPT/CASP1/CASP5/CASP8/CASR/CBL/CDKN1A/CDKN2B/CLEC16A/CNN2/COMT/CTSV/DAG1/DEPDC5/DNAJC15/DNM1L/EHMT2/EIF2AK3/ENG/FBXO22/FES/FOSL1/FOXO1/GABARAPL1/GABARAPL3/GADD45A/GAS2L1/GAS6/GCGR/GJA1/GLRX2/GSTP1/HDAC4/HFE/IL13/IL15/IL1B/IMPACT/ITFG2/ITGA2/KCNJ2/KPTN/L…	135
GO:0043523	BP	GO:0043523	regulation of neuron apoptotic process	94/5894	214/18866	5.93e-05	0.000887449	0.000582785	ADNP/AGAP2/AMBRA1/ANGPT1/ASCL1/ATF2/ATF4/ATM/BACE1/BCL2/BCL2L1/BDNF/CASP3/CCL2/CDC34/CDC42/CDK5R1/CHL1/CITED1/CLN3/CNTF/CNTFR/CRLF1/CTNNB1/CX3CL1/EGLN3/EPHA7/FASLG/FGF20/FGF8/FOXB1/FYN/FZD9/GABRA5/GABRB2/GABRB3/GATA3/GDF5/GDNF/GRIK2/GRIK5/GRIN1/GRM4/GSK3A/HDAC4/HRAS/HYOU1/ISL1/ITGA1/KRAS/LANCL1/LGMN/LIG4/LRP1/MAG/MAP3K12/MECP2/MT3/MTNR1B/MYB/NAIP/NES/NF1/NGF/NQO1/NQO2/NTF3/NTRK1/NUPR1/PAK3/PIN1/P…	94
GO:0030431	BP	GO:0030431	sleep	22/5894	34/18866	5.99e-05	0.000893974	0.000587069	ADORA1/ADRB1/CACNA1I/CHRNB2/CRH/CSF2/DLAT/DRD2/DRD3/GHRH/GHRHR/GRIN2A/HTR2A/KCNA2/MTNR1B/NPY2R/OXT/OXTR/PER3/PTGDR/SLC29A1/STAR	22
GO:0045927	BP	GO:0045927	positive regulation of growth	116/5894	274/18866	6.31e-05	0.00094032	0.000617505	ADNP/ADNP2/ANAPC2/ATP8A2/AVP/AVPR1A/BBS4/BCL2/BDNF/BMP10/BMPR1A/BMPR2/CAPN3/CDC42/CDH4/CDKL5/CHD7/CIB1/CPNE6/CREB1/CSF1/CSH1/DBN1/DDX3X/DERL2/DIO3/DISC1/DNPH1/DRD2/DSCAM/EDN1/EIF4G2/ERBB4/F2/FGF8/FGF9/FGFR1/FGFR2/GH1/GH2/GHR/GHRH/GHRHR/GHSR/GPR21/HEY2/HPN/HYAL1/IGFBP1/IL9/INS/INSR/IST1/KLHL22/L1CAM/LEP/LPAR3/LRP1/MAP2K5/MAP3K13/MAPK1/MEGF8/MTM1/MTOR/MYOD1/N6AMT1/NDEL1/NEDD4L/NGF/NIPBL/NOTCH1/NTN1…	116
GO:0030324	BP	GO:0030324	lung development	80/5894	177/18866	6.33e-05	0.00094032	0.000617505	ACVR2B/ADAMTSL2/ALDH1A2/ASCL1/BAG6/BMP4/BMPR1A/BMPR2/CCDC40/CDC42/CEBPA/CELSR1/CREB1/CRH/CRISPLD2/CTNNB1/CYP1A2/DAG1/DLG5/DNAAF1/DPPA4/EIF4EBP1/EP300/EPAS1/FGF1/FGF18/FGF8/FGF9/FGFR1/FGFR2/FLT4/FOXA1/FOXJ1/GPC3/GRHL2/HEG1/HES1/HOXA5/HS6ST1/ID1/IGFBP5/IL13/JMJD6/KRAS/LAMA1/LHX3/LIF/LTBP3/MAN1A2/MAN2A1/MAPK1/NKX2-1/NKX2-8/NOS3/NOTCH1/PGR/PHEX/PROX1/RAB3A/RBP4/RBPJ/RC3H2/SFTPD/SHH/SMAD2/SOX9/SP3/SPR…	80
GO:0050863	BP	GO:0050863	regulation of T cell activation	137/5894	332/18866	6.37e-05	0.000944445	0.000620214	ABL1/AGER/AIF1/AP3D1/BAD/BMP4/BTN2A2/CAMK4/CASP3/CAV1/CCL2/CCL21/CCL5/CCR2/CD160/CD1D/CD2/CD209/CD28/CD3E/CD40LG/CD46/CD47/CD6/CD70/CD74/CDC42/CLPTM1/CR1/CRTAM/CTNNB1/CYLD/CYP26B1/DLG1/DLG5/EBI3/EFNB2/EFNB3/EPO/FCGR2B/FGL1/FLOT2/FOXJ1/FOXP3/FYN/GATA3/GLMN/GNRH1/GRAP2/GRB2/HES1/HFE/HHLA2/HLA-DMB/HLA-DOA/HLA-DPA1/HLA-DPB1/HLA-E/IFNA2/IFNB1/IFNG/IGFBP2/IL12B/IL12RB1/IL15/IL1B/IL21/IL23A/IL4/IL4R/IL6…	137
GO:0030101	BP	GO:0030101	natural killer cell activation	44/5894	85/18866	6.4e-05	0.000947151	0.000621991	AP1G1/BAG6/CASP8/CD2/FGR/FLT3LG/GAS6/HLA-E/ID2/IFNA1/IFNA10/IFNA14/IFNA16/IFNA17/IFNA2/IFNA4/IFNA5/IFNA7/IFNA8/IFNB1/IFNW1/IL12B/IL15/IL18R1/IL23A/KAT7/KIR3DS1/LAMP1/LEP/MICA/NCR1/NCR3/PGLYRP1/PIBF1/PRDX1/PTPN22/RHBDD3/SLAMF7/SNX27/SP3/STAT5B/ULBP1/ULBP2/VAMP7	44
GO:1901214	BP	GO:1901214	regulation of neuron death	133/5894	321/18866	6.48e-05	0.000952099	0.00062524	ABL1/ADNP/ADORA1/AGAP2/AMBRA1/ANGPT1/ASCL1/ATF2/ATF4/ATG7/ATM/BACE1/BAD/BCL2/BCL2L1/BDNF/CASP3/CASP8/CBL/CCL2/CCL5/CD200/CDC34/CDC42/CDK5R1/CHL1/CITED1/CLN3/CNTF/CNTFR/CREB1/CRLF1/CSF1/CSF3/CTNNB1/CX3CL1/DCC/DKK1/EFNB2/EGLN1/EGLN3/EPHA7/EPHB1/EPO/FASLG/FCGR2B/FGF20/FGF8/FOXB1/FYN/FZD9/GABRA5/GABRB2/GABRB3/GATA3/GDF5/GDNF/GPR75/GRIK2/GRIK5/GRIN1/GRIN2B/GRM4/GSK3A/HDAC4/HRAS/HYOU1/IFNG/IL13/ISL1/IT…	133
GO:0090493	BP	GO:0090493	catecholamine uptake	14/5894	18/18866	6.48e-05	0.000952099	0.00062524	ACTB/DRD1/DRD2/DRD3/DRD4/GDNF/RAB3B/SLC22A1/SLC22A2/SLC22A3/SLC6A2/SLC6A3/SNCA/TOR1A	14
GO:2000831	BP	GO:2000831	regulation of steroid hormone secretion	14/5894	18/18866	6.48e-05	0.000952099	0.00062524	AGT/AGTR2/BMP6/C1QTNF1/CRH/CRHR1/GAL/GALR1/GDF9/POMC/PTPN11/REN/RETN/TAC1	14
GO:0051588	BP	GO:0051588	regulation of neurotransmitter transport	58/5894	120/18866	6.51e-05	0.000954509	0.000626823	ADCY1/ADRA1A/APBA1/APBA2/ASIC1/ATP2A2/BACE1/BAIAP3/CACNA1D/CAMK2A/CHRM2/CHRNA3/CHRNA6/CHRNB2/CHRNB3/CHRNB4/CPLX2/CPLX3/CSPG5/DNM1L/DRD1/DRD2/DRD3/DRD4/GDNF/GRIK5/HTR1B/HTR2A/ITGB3/KCNC4/KCNMB4/MCTP1/NCS1/NF1/NOS1/P2RY1/P2RY4/PPFIA2/PREPL/PRKCG/RAB3A/RAB3B/RAB3GAP1/RHOT1/RIMS3/SLC30A1/SLC4A8/SNCA/STXBP1/STXBP5L/SYN1/SYP/SYT1/SYT11/SYT12/TOR1A/UNC13A/WNT7A	58
GO:0098727	BP	GO:0098727	maintenance of cell number	75/5894	164/18866	6.58e-05	0.00096293	0.000632353	ARID1A/ASCL2/BCL9/BMPR1A/CDC73/CDH2/CDX2/CNOT2/CTNNB1/CTR9/CUL4A/DDX6/DPPA4/EIF4ENIF1/ELF5/ESRRB/FANCC/FGF4/FOXD3/FOXO1/FZD7/HES1/JAG1/KDM3A/KDM4C/LIF/LIG4/LIN28A/LSM1/MCPH1/MED12/MED14/MED15/MED27/MED28/NANOG/NCOA3/NIPBL/NOTCH1/NR2E1/PADI4/PAF1/PAX2/PAX8/PELO/POLR2A/POLR2E/POLR2I/PRDM14/PRDM16/PROX1/RBPJ/REST/RTF1/SALL1/SETD6/SIX2/SKI/SMAD2/SMAD4/SMC3/SMO/SOX2/SOX9/SS18/STAT3/TAF6L/TAL1/TBX3/TRI…	75
GO:1903351	BP	GO:1903351	cellular response to dopamine	46/5894	90/18866	6.62e-05	0.000966686	0.00063482	ABL1/ATF4/CALY/CHRM2/CHRM3/CHRM4/CHRM5/DNM2/DRD1/DRD2/DRD3/DRD4/DRD5/FLNA/GABPA/GNA11/GNAL/GNAS/GSK3A/HDAC2/HRH2/HRH3/HRH4/HTR1A/HTR1B/HTR1D/HTR1E/HTR1F/HTR2A/HTR2B/HTR2C/HTR3A/HTR4/HTR5A/HTR6/HTR7/ID1/MAPK1/OPRM1/OR10H1/OR10H2/OR10H3/PTGER1/RGS4/RGS9/VPS35	46
GO:1990138	BP	GO:1990138	neuron projection extension	78/5894	172/18866	6.76e-05	0.000982511	0.000645212	ABL1/ADNP/ANAPC2/ARHGAP4/BCL11A/BDNF/BMPR2/CDH4/CDK5R1/CDKL3/CDKL5/CPNE6/CTNNB1/DBN1/DISC1/DNM2/DPYSL2/DSCAM/EMX1/FLRT1/FLRT3/IFRD1/IMPACT/IQGAP1/KIAA0319/L1CAM/LLPH/LRP1/MAG/MAP2/MAP3K13/MEGF8/MT3/NDEL1/NDN/NEDD4L/NLGN3/NTN1/OLFM1/PAFAH1B1/PAK6/PLAA/POU4F2/POU4F3/PPP3CB/PRKCZ/PTPRS/RAB21/RNF6/RTN4/SEMA3A/SEMA3B/SEMA3D/SEMA4A/SEMA4G/SEMA6A/SEMA6B/SEMA6C/SEMA6D/SEMA7A/SLC9A6/SLIT1/SMURF1/SPG11/SRF…	78
GO:0048814	BP	GO:0048814	regulation of dendrite morphogenesis	48/5894	95/18866	6.76e-05	0.000982511	0.000645212	ACTR2/ANAPC2/ANKRD27/ARC/ARHGAP33/CAMK2B/CAPRIN1/CDK5R1/CDKL3/CDKL5/CHRNA3/CHRNB2/CUL7/CUX2/DBN1/DNM1L/DNM3/EPHA4/FBXO31/GRIN1/HECW1/ID1/ITPKA/KALRN/KIF1A/NEDD4/NEDD4L/NEUROG3/NLGN3/NR2E1/OBSL1/PAFAH1B1/PAK3/PARP6/PPFIA2/PPP3CA/PQBP1/PTEN/PTPRD/RAB21/SIPA1L1/STK11/TLX2/TNIK/TRPC5/TRPC6/UBE3A/VAMP7	48
GO:0060541	BP	GO:0060541	respiratory system development	90/5894	204/18866	6.93e-05	0.0010041	0.000659392	ACVR2B/ADAMTSL2/ALDH1A2/ASCL1/ASS1/BAG6/BMP4/BMPR1A/BMPR2/CCDC40/CDC42/CEBPA/CELSR1/CHD7/CREB1/CRH/CRISPLD2/CTNNB1/CYP1A2/DAG1/DLG5/DNAAF1/DPPA4/EDA/EIF4EBP1/EP300/EPAS1/FGF1/FGF18/FGF8/FGF9/FGFR1/FGFR2/FLT4/FOXA1/FOXJ1/GPC3/GRHL2/HEG1/HES1/HESX1/HOXA5/HS6ST1/ID1/IGFBP5/IL13/JMJD6/KRAS/LAMA1/LHX3/LIF/LRP6/LTBP3/MAN1A2/MAN2A1/MAPK1/NKX2-1/NKX2-8/NOS3/NOTCH1/PGR/PHEX/PHOX2B/PROX1/RAB3A/RARA/RBP4/RB…	90
GO:0019934	BP	GO:0019934	cGMP-mediated signaling	20/5894	30/18866	6.94e-05	0.0010041	0.000659392	ADNP/CD36/GUCA2B/GUCY2F/HTR2B/HTR2C/KCNC2/MTNR1B/NPPA/NPPB/NPPC/NPR2/PDE10A/PDE11A/PDE3A/PDE9A/PDZD3/PRKG1/PTK2B/RUNDC3A	20
GO:0009636	BP	GO:0009636	response to toxic substance	107/5894	250/18866	7.05e-05	0.00101763	0.000668271	ABCC2/ABCG2/ABTB2/ADAMTS13/ADH5/AKR1B10/ALB/ALOX5AP/APOA4/ARHGAP33/ASS1/ATF4/BCL2/BPHL/CCL5/CD36/CDH1/CDKN1A/CHKA/CHUK/CLIC2/CNP/CPS1/CYP1B1/CYP2F1/DDC/DHRS2/DNMT3A/DRD2/EHMT1/EPHX1/EPX/ERCC6/FABP1/FANCC/FECH/GABRB1/GCH1/GLYAT/GPX1/GSR/GSTA1/GSTM1/GSTM2/GSTM3/GSTP1/GSTT1/GSTZ1/GUCY2C/HBD/HBE1/HBQ1/HP/KCNC1/KCNC2/KDM3B/KDM5B/KDM6B/LPO/MAPK1/MDM2/MPO/MT1E/MT1F/MT1G/MT1H/MT1HL1/MT1M/MT1X/MT2A/MT3/MT…	107
GO:0046824	BP	GO:0046824	positive regulation of nucleocytoplasmic transport	36/5894	66/18866	7.1e-05	0.00102017	0.000669943	BAG3/CDH1/EMD/FLNA/GAS6/HCLS1/HDAC3/HYAL2/IFNG/IL1B/IPO5/JUP/LEP/MAPK1/MAVS/MDM2/NEDD4/NRDE2/PIK3R2/PPM1A/PRKACA/PSEN1/PTGS2/RAN/RBM22/RBM26/RIOK2/SFN/SHH/SMAD3/SMO/TARDBP/TCF7L2/TP53/TPR/YWHAE	36
GO:0003009	BP	GO:0003009	skeletal muscle contraction	26/5894	43/18866	7.15e-05	0.00102017	0.000669943	ATP2A1/ATP2A2/ATP8A2/CASQ1/CAV3/CHRNA1/CHRNB1/CHRND/CHUK/EEF2/GSTM2/KCNJ2/MB/MYH3/MYH7/MYH8/SCN4A/STAC/TCAP/TNNC1/TNNC2/TNNI1/TNNI2/TNNI3/TNNT1/TNNT3	26
GO:2000648	BP	GO:2000648	positive regulation of stem cell proliferation	26/5894	43/18866	7.15e-05	0.00102017	0.000669943	CITED1/CTNNB1/CX3CL1/DCT/DISC1/DRD2/FOXG1/FZD3/GJA1/KAT7/KITLG/LTBP3/N4BP2L2/NANOG/NOTCH1/NR2E1/PAX6/PDCD2/SHH/SIRT6/SMO/TBX3/TERT/THPO/VEGFC/ZNF335	26
GO:0042310	BP	GO:0042310	vasoconstriction	41/5894	78/18866	7.16e-05	0.00102017	0.000669943	ACE/ADM/ADRA1A/ADRA1B/ADRA2A/ADRA2B/ADRA2C/AGT/AVP/AVPR1A/AVPR1B/AVPR2/BMPR2/CASR/CAV1/CHRM3/COMP/DBH/DOCK5/DRD5/EDN1/FGB/GJA1/GJA5/GRIP2/HRH2/HTR1A/HTR1B/HTR1D/HTR2A/HTR2B/HTR7/KCNMB2/KCNMB4/KEL/LEP/OXTR/PTAFR/PTGS2/SLC8A1/TRPM4	41
GO:0003085	BP	GO:0003085	negative regulation of systemic arterial blood pressure	15/5894	20/18866	7.21e-05	0.00102017	0.000669943	ADORA1/ADRA1A/ADRB1/ADRB2/ADRB3/AGTR2/BBS4/BMPR2/CALCA/CRH/GPR37L1/NPPA/NPPB/NTSR1/PRCP	15
GO:0032634	BP	GO:0032634	interleukin-5 production	15/5894	20/18866	7.21e-05	0.00102017	0.000669943	CRLF2/EPX/FOXP3/GATA3/IFNA2/IL1RL1/IL25/IL5RA/IL9/NLRP3/PDE4D/PRKCZ/RARA/SCGB1A1/TNFRSF21	15
GO:0033141	BP	GO:0033141	positive regulation of peptidyl-serine phosphorylation of STAT protein	15/5894	20/18866	7.21e-05	0.00102017	0.000669943	IFNA1/IFNA10/IFNA14/IFNA16/IFNA17/IFNA2/IFNA4/IFNA5/IFNA7/IFNA8/IFNB1/IFNG/IFNW1/LIF/RET	15
GO:1905939	BP	GO:1905939	regulation of gonad development	15/5894	20/18866	7.21e-05	0.00102017	0.000669943	DMRT1/GDF9/GNRH1/HYAL3/INSR/NR5A1/NUPR1/RETN/SEMA3A/SOX9/SRC/SRY/WNT4/WT1/ZFPM2	15
GO:2000193	BP	GO:2000193	positive regulation of fatty acid transport	15/5894	20/18866	7.21e-05	0.00102017	0.000669943	AVPR1B/CYP4A11/CYP4F2/EDN1/FABP3/IL1B/MAP2K6/MIF/NTSR1/OXT/P2RX7/PLA2G6/PLA2R1/SSTR4/TNFSF11	15
GO:0072376	BP	GO:0072376	protein activation cascade	19/5894	28/18866	7.33e-05	0.00103019	0.000676523	A2M/APOH/C1QBP/F11/F12/F2/F3/F7/F8/F9/FGB/GP1BA/GP5/GP9/KNG1/PRCP/SERPINC1/SERPING1/TFPI	19
GO:0072378	BP	GO:0072378	blood coagulation	fibrin clot formation	19/5894	28/18866	7.33e-05	0.00103019	0.000676523	A2M/APOH/C1QBP/F11/F12/F2/F3/F7/F8/F9/FGB/GP1BA/GP5/GP9/KNG1/PRCP/SERPINC1/SERPING1/TFPI	19
GO:2000191	BP	GO:2000191	regulation of fatty acid transport	19/5894	28/18866	7.33e-05	0.00103019	0.000676523	AGTR2/AKT2/AVPR1B/CYP4A11/CYP4F2/EDN1/FABP3/IL1B/IRS2/MAP2K6/MIF/NTSR1/OXT/P2RX7/PLA2G6/PLA2R1/SSTR4/SYK/TNFSF11	19
GO:0007568	BP	GO:0007568	aging	132/5894	319/18866	7.39e-05	0.00103396	0.000678999	ABL1/ADM/ADRA1A/AGER/AGT/AKT3/APAF1/ARNTL/ASS1/ATG7/ATM/ATP8A2/BCL2/BMPR1A/CALCA/CANX/CCL11/CDKN1A/CDKN2A/CDKN2B/CNP/COMP/COQ7/CREB1/CTC1/CTSV/CX3CL1/DAG1/DCN/DDC/DKK1/DLD/DNMBP/DNMT3A/EDN1/EEF2/ENDOG/ENG/ENO3/EPO/ERCC1/ERCC2/FBXO4/FOXG1/FOXO4/FZR1/GHRHR/GLRX2/GNRH1/GRB2/GRM5/GSK3A/HMGA1/HRAS/HTR2A/HYAL2/ID2/IDE/IGFBP1/IGFBP2/IGFBP5/IL15/ING2/KAT6A/KIR2DL4/KRAS/KRT33B/KRT83/LEP/LRP1/MAPK1/MBD1/MB…	132
GO:0009416	BP	GO:0009416	response to light stimulus	132/5894	319/18866	7.39e-05	0.00103396	0.000678999	AANAT/ABCA4/ADAM2/AGRP/AIPL1/AKT2/ATF4/ATP8A2/BCL2/BEST1/C9orf116/CACNA1F/CAMKMT/CASP3/CCAR2/CCK/CCND1/CDKN1A/CDKN2D/CEP250/CHRNB2/CNGB1/COPS3/CRB1/CREB1/CREBBP/CRIP1/CRTC1/DBH/DDB2/DDHD2/DNM2/DRD1/DRD2/DRD3/DYNLRB1/EP300/ERCC1/ERCC2/ERCC4/ERCC6/ERCC8/FBXL8/FECH/FNTA/FOXB1/GNA11/GNAT1/GNAT2/GPR52/GPR88/GPX1/GRIN1/GRIN2A/GRK1/GRK4/GRM6/GUCA1B/GUCY2F/HMGCS1/HMGN1/HOXA1/HRH2/HYAL1/HYAL2/HYAL3/ID2/IL…	132
GO:0002706	BP	GO:0002706	regulation of lymphocyte mediated immunity	71/5894	154/18866	7.41e-05	0.00103505	0.000679711	AGER/AP1G1/BTK/C3/C4BPA/C4BPB/CCR2/CD160/CD1B/CD1D/CD226/CD28/CD96/CR1/CRK/CRTAM/FCGR2B/FOXJ1/FOXP3/FUT7/FZD5/GATA3/HFE/HLA-E/HPX/IFNA2/IFNB1/IL12B/IL12RB1/IL18R1/IL18RAP/IL1B/IL1R1/IL21/IL23A/IL4/IL6/IL7R/KIR2DL4/LAG3/LAMP1/LEP/LGALS9/LTA/MALT1/MAP3K7/MICA/MLH1/MR1/NCR1/NCR3/NDFIP1/NLRP3/P2RX7/PARP3/PPP3CB/PRKCZ/PVR/SERPINB9/SH2D1A/SLC22A13/STAT5B/STAT6/SUPT6H/TBX21/THOC1/TNF/TRAF6/TRPM4/VAV1/WAS	71
GO:0048708	BP	GO:0048708	astrocyte differentiation	43/5894	83/18866	7.53e-05	0.00104912	0.000688951	ABL1/AGER/BIN1/BMP2/CNTF/CNTN2/DAB1/DRD1/EPHA4/F2/GCM1/GPR37L1/HES1/ID2/IFNG/IL1B/IL6/KRAS/LAMC3/LDLR/LIF/LRP1/MAG/MAPK1/MBD1/MT3/NF1/NKX2-2/NOTCH1/NR2E1/PAX6/POU3F2/PSEN1/PTPN11/ROR2/S100A8/SHH/SMO/SOX9/STAT3/TAL1/TNF/VIM	43
GO:0051123	BP	GO:0051123	RNA polymerase II preinitiation complex assembly	18/5894	26/18866	7.6e-05	0.0010573	0.000694326	ATF7IP/BRF2/CREB1/DR1/ESR1/GTF2A2/PSMC3/PSMC4/PSMC5/PSMC6/TAF1/TAF12/TAF7/TAF7L/TBP/THRA/TP53/WNT10B	18
GO:0044062	BP	GO:0044062	regulation of excretion	17/5894	24/18866	7.72e-05	0.00107047	0.00070297	ADORA1/AGT/AGTR2/AVP/AVPR1A/AVPR2/COMT/CORIN/DRD2/DRD3/EDN1/GNAI2/NPHS1/NPPB/OXT/SNX5/TAC1	17
GO:0009135	BP	GO:0009135	purine nucleoside diphosphate metabolic process	64/5894	136/18866	7.78e-05	0.0010741	0.000705355	AAAS/AK1/AK5/ALDOA/ALDOC/AMPD3/ARNT/BAD/BPGM/CBFA2T3/DLG1/EIF6/ENO3/ENTPD2/EP300/ESRRB/GAPDH/GAPDHS/GCK/GPD1/GPI/HDAC4/HKDC1/HTR2A/IFNG/INS/INSR/MLXIPL/MPP1/MYOG/NUDT18/NUDT9/NUP188/NUP214/NUP54/NUP88/NUP98/NUPR1/OGDH/OGDHL/OGT/P2RX7/PFKFB1/PFKFB3/PFKFB4/PFKL/PFKP/PGAM1/PGK1/PGK2/PKLR/POM121/PPARA/PRKAA1/PRKAG2/PSEN1/RANBP2/SEC13/SEH1L/SIRT6/SLC4A1/STAT3/TPI1/TPR	64
GO:0009179	BP	GO:0009179	purine ribonucleoside diphosphate metabolic process	64/5894	136/18866	7.78e-05	0.0010741	0.000705355	AAAS/AK1/AK5/ALDOA/ALDOC/AMPD3/ARNT/BAD/BPGM/CBFA2T3/DLG1/EIF6/ENO3/ENTPD2/EP300/ESRRB/GAPDH/GAPDHS/GCK/GPD1/GPI/HDAC4/HKDC1/HTR2A/IFNG/INS/INSR/MLXIPL/MPP1/MYOG/NUDT18/NUDT9/NUP188/NUP214/NUP54/NUP88/NUP98/NUPR1/OGDH/OGDHL/OGT/P2RX7/PFKFB1/PFKFB3/PFKFB4/PFKL/PFKP/PGAM1/PGK1/PGK2/PKLR/POM121/PPARA/PRKAA1/PRKAG2/PSEN1/RANBP2/SEC13/SEH1L/SIRT6/SLC4A1/STAT3/TPI1/TPR	64
GO:0061180	BP	GO:0061180	mammary gland epithelium development	38/5894	71/18866	7.82e-05	0.00107817	0.000708028	AKT2/ATP2C2/CAV3/CCL11/CCND1/CSF1/CSF1R/ELF5/ERBB4/ESR1/FGFR2/FOXB1/GATA3/GPX1/HOXA5/ID2/KDM5B/LATS1/LRP6/MAPK1/MST1/MSX1/NTN1/PGR/PRLR/PTCH1/ROBO1/RTN4/SCRIB/SMO/SOSTDC1/SRC/STAT6/TBX3/TNFSF11/VDR/WNT4/WNT5A	38
GO:0031056	BP	GO:0031056	regulation of histone modification	69/5894	149/18866	7.84e-05	0.0010782	0.000708049	AKAP8L/ATG5/ATM/ATRX/BRD7/CDK9/CTBP1/CTNNB1/CTR9/EID1/FOXP3/GATA3/GCG/GFI1/GLYR1/IL1B/ING2/ISL1/JARID2/KAT7/KDM3A/KDM4C/KDM4D/KDM5A/KMT2A/KMT2B/LIF/MECP2/MTHFR/MYB/NAP1L2/NIPBL/NOS1/NSD1/OGT/OTUB2/PAF1/PARG/PAX7/PHF1/PIH1D1/PRDM12/PRDM9/PRKD1/PRKD2/RNF40/RPS6KA4/RPS6KA5/RTF1/SETD5/SKI/SMAD4/SMARCB1/SNCA/SPHK2/SUPT6H/TADA3/TAF7/THAP7/TP53/TRIP12/UBE2N/WDR61/WDR70/ZBTB7B/ZMPSTE24/ZNF304/ZNF335/ZNF4…	69
GO:0032874	BP	GO:0032874	positive regulation of stress-activated MAPK cascade	77/5894	170/18866	7.88e-05	0.00108169	0.00071034	AGER/ANKRD6/ARHGEF5/BIRC7/BMP2/CCL21/CD40LG/CDC42/DKK1/EDA2R/EDAR/EDN1/EMC10/EPHA4/ERCC6/ERN1/ERN2/F2RL1/FCGR2B/FGD2/FLT4/FZD10/FZD5/FZD7/GADD45A/HAND2/HRAS/IL1B/IL26/LEP/LTBR/MAP2K7/MAP3K10/MAP3K12/MAP3K13/MAP3K2/MAP3K5/MAP3K6/MAP3K7/MAP4K5/MAPK8IP2/MAPK8IP3/MID1/MINK1/MMP8/NCF1/NOD1/NOX1/PKN1/PLCB1/PTK2B/PTPN1/PYCARD/RB1CC1/ROR2/SDCBP/SEMA3A/SERPINF2/SLAMF1/SPAG9/STK25/SYK/TAOK1/TAOK2/TGFB2/TLR…	77
GO:0009746	BP	GO:0009746	response to hexose	89/5894	202/18866	8.04e-05	0.00110073	0.000722844	AACS/ACVR2B/ADCY8/ADIPOQ/ADRA2A/AGER/APOA2/ATG7/BAD/BAIAP3/BRSK2/CASP3/CASR/CDK16/CDKN1B/CPB2/CRH/CTSV/CYP7A1/EIF2B1/EIF2B2/EIF2B3/ENDOG/EPHA5/ERN1/FKBP1B/GAS6/GATA4/GCG/GCK/GHRHR/GIP/GIPR/GJA1/GPLD1/GPR27/GPR68/GRIK5/HMGN3/IRS2/KHK/KIF5B/LIN28A/LRP1/MLXIPL/MPC2/NADK/NDUFA9/NKX2-2/NR1H4/PAX2/PCK1/PDK3/PDX1/PFKL/PIH1D1/PKLR/PLA2G6/POLG/PPARD/PPP3CA/PPP3CB/PRKAA1/PRKACA/PRKCE/PRLH/PTEN/PTGS2/PTK2B/…	89
GO:0042596	BP	GO:0042596	fear response	25/5894	41/18866	8.09e-05	0.00110285	0.000724239	ADCYAP1/ADRB1/ASIC1/ASIC4/BCL2/BDNF/BRINP1/CCK/CRH/DBH/DRD1/DRD4/GABRA5/GJA1/GRIK2/HTR1A/HTR2C/MAPK8IP2/MECP2/MORC1/NEUROD2/NPY2R/NR2E1/PENK/VDAC3	25
GO:0003044	BP	GO:0003044	regulation of systemic arterial blood pressure mediated by a chemical signal	29/5894	50/18866	8.12e-05	0.00110285	0.000724239	ACE/ADRA1A/ADRA1B/ADRB1/ADRB2/ADRB3/AGT/AGTR2/ATP6AP2/AVPR1A/AVPR1B/AVPR2/CORIN/CPA3/CYP11B2/DRD3/DRD5/EDN1/F2RL1/GJA5/HSD11B2/NOS3/NOX1/OR51E2/OXTR/PDE4D/REN/SERPINF2/SLC2A5	29
GO:0071715	BP	GO:0071715	icosanoid transport	29/5894	50/18866	8.12e-05	0.00110285	0.000724239	ABCC2/ACE/AGTR2/AVPR1B/CYP4A11/CYP4F2/DRD2/DRD3/DRD4/EDN1/IL1B/LEP/MAP2K6/MIF/NOS2/NTSR1/OXT/P2RX7/PLA2G2A/PLA2G2D/PLA2G2E/PLA2G2F/PLA2G3/PLA2G4A/PLA2G6/PLA2R1/SSTR4/SYK/TNFSF11	29
GO:1901571	BP	GO:1901571	fatty acid derivative transport	29/5894	50/18866	8.12e-05	0.00110285	0.000724239	ABCC2/ACE/AGTR2/AVPR1B/CYP4A11/CYP4F2/DRD2/DRD3/DRD4/EDN1/IL1B/LEP/MAP2K6/MIF/NOS2/NTSR1/OXT/P2RX7/PLA2G2A/PLA2G2D/PLA2G2E/PLA2G2F/PLA2G3/PLA2G4A/PLA2G6/PLA2R1/SSTR4/SYK/TNFSF11	29
GO:0051648	BP	GO:0051648	vesicle localization	99/5894	229/18866	8.14e-05	0.00110321	0.000724476	ACTN4/ANKRD28/AP1AR/AP1M2/AP3B2/AP3D1/ARFGAP2/ASIP/BBS4/BBS7/BRSK2/CDH2/CLASP1/CLN3/CNIH3/CSNK1D/CTNNB1/DNM2/DNM3/F5/F8/FNBP1L/GBF1/GOSR1/GOSR2/GPR143/GRIA1/HAP1/KIF13A/KIF1A/KIF3A/KIF5A/KIF5B/KLHL12/LIN7A/LMAN1/MAGI2/MAP2/MYO15A/MYO1A/MYO1C/MYO1D/MYO1E/MYO1F/MYO7B/NDEL1/NLGN3/PAFAH1B1/PCLO/PDCD6/PICALM/PIK3CG/PPFIA2/PPP6C/PRKCZ/PSEN1/PTEN/RAB11B/RAB1A/RAB1B/RAB3A/RAB7A/SAR1A/SCFD1/SCRIB/SEC13/SE…	99
GO:0048634	BP	GO:0048634	regulation of muscle organ development	72/5894	157/18866	8.17e-05	0.00110468	0.000725439	AKIRIN1/ARNTL/BCL2/BMP10/BMP2/BMP4/BMPR1A/CAV3/CDON/CREB1/CTDP1/CTNNB1/CXADR/CYP26B1/DDX17/DKK1/EDN1/EFNB2/EPHB1/ERBB4/FBXO22/FGF20/FGF3/FGF8/FGF9/FGFR1/FGFR2/FRS2/FZD7/GJA1/GPC1/GSK3A/HDAC4/HDAC9/HEY2/JARID2/KCNK2/LUC7L/MAPK1/MAPK11/MSTN/MTM1/MTOR/MYF5/MYF6/MYOD1/MYOG/NEUROG1/NKX2-5/NOTCH1/PIN1/PPARA/PRKAA1/PTEN/RBP4/RBPJ/RGS4/SFMBT1/SHH/SIRT2/SMAD3/SMAD4/SOX15/TBX1/TBX2/TLL2/TP73/USP19/WNT10B/Y…	72
GO:1903524	BP	GO:1903524	positive regulation of blood circulation	40/5894	76/18866	8.41e-05	0.00113477	0.000745201	ADM/ADRA1A/ADRA1B/ADRA2C/ADRB1/ATP1A1/ATP2A1/ATP2A2/AVP/AVPR1A/AVPR1B/AVPR2/CASR/CAV1/CHRM3/DBH/EDN1/F2RL1/FGB/GCH1/GJA1/GJA5/GSK3A/HEY2/HRH2/HTR2A/NKX2-5/NPPA/OR51E2/OXTR/PDE4D/PTAFR/PTGER2/PTGS2/RGS4/SCN3B/SLC1A1/TACR3/TGFB2/TRPM4	40
GO:0099173	BP	GO:0099173	postsynapse organization	78/5894	173/18866	8.58e-05	0.00115584	0.000759035	ACTB/ACTR2/ARC/ARHGAP22/ARHGAP33/CAMK2B/CAPRIN1/CBLN1/CDC42/CDH2/CDK5R1/CDKL5/CEL/CHRNB1/CNKSR2/COLQ/CRIPT/CRKL/CTNND2/CUX2/DBN1/DLG1/DLG4/DNM1L/DNM3/DOCK10/EGLN1/EPHA4/EPHA7/EPHB1/EPHB3/FCGR2B/FNTA/FRMPD4/FYN/FZD9/GAP43/GDNF/GHSR/GLRB/GPHN/GRIN2B/HDAC6/INA/INS/INSR/ITPKA/KALRN/KIF1A/LGMN/LRP4/LRRTM2/MAGI2/MUSK/NEFH/NLGN3/NLGN4X/NLGN4Y/NRXN2/OPHN1/PAFAH1B1/PAK3/PICK1/POTEKP/PPFIA2/PTEN/PTPRD/PTPR…	78
GO:0030323	BP	GO:0030323	respiratory tube development	81/5894	181/18866	8.68e-05	0.00115891	0.000761051	ACVR2B/ADAMTSL2/ALDH1A2/ASCL1/BAG6/BMP4/BMPR1A/BMPR2/CCDC40/CDC42/CEBPA/CELSR1/CREB1/CRH/CRISPLD2/CTNNB1/CYP1A2/DAG1/DLG5/DNAAF1/DPPA4/EIF4EBP1/EP300/EPAS1/FGF1/FGF18/FGF8/FGF9/FGFR1/FGFR2/FLT4/FOXA1/FOXJ1/GPC3/GRHL2/HECA/HEG1/HES1/HOXA5/HS6ST1/ID1/IGFBP5/IL13/JMJD6/KRAS/LAMA1/LHX3/LIF/LTBP3/MAN1A2/MAN2A1/MAPK1/NKX2-1/NKX2-8/NOS3/NOTCH1/PGR/PHEX/PROX1/RAB3A/RBP4/RBPJ/RC3H2/SFTPD/SHH/SMAD2/SOX9/SP…	81
GO:0009749	BP	GO:0009749	response to glucose	87/5894	197/18866	8.68e-05	0.00115891	0.000761051	AACS/ACVR2B/ADCY8/ADIPOQ/ADRA2A/AGER/APOA2/ATG7/BAD/BAIAP3/BRSK2/CASP3/CASR/CDK16/CDKN1B/CPB2/CRH/CTSV/CYP7A1/EIF2B1/EIF2B2/EIF2B3/ENDOG/EPHA5/ERN1/FKBP1B/GAS6/GATA4/GCG/GCK/GHRHR/GIP/GIPR/GJA1/GPLD1/GPR27/GPR68/GRIK5/HMGN3/IRS2/KHK/KIF5B/LIN28A/LRP1/MLXIPL/MPC2/NADK/NDUFA9/NKX2-2/NR1H4/PAX2/PCK1/PDK3/PDX1/PFKL/PIH1D1/PKLR/PLA2G6/POLG/PPARD/PPP3CA/PPP3CB/PRKAA1/PRKACA/PRKCE/PRLH/PTEN/PTK2B/RAB11B…	87
GO:0048839	BP	GO:0048839	inner ear development	87/5894	197/18866	8.68e-05	0.00115891	0.000761051	AHI1/ATG5/ATOH1/ATP6V1B1/ATP8A2/ATP8B1/BCR/BDNF/BMP2/BMP4/CDKN1B/CEBPA/CEBPD/CELSR1/CHD7/CHRNA10/CHRNA9/CYTL1/DCHS1/DLX6/EPHA4/ESRRB/EYA1/FGF20/FGF8/FGF9/FGFR1/FGFR2/FOXG1/FOXI1/FRZB/FZD3/GABRA5/GABRB2/GABRB3/GATA3/GBX2/HES1/HESX1/HEY2/HOXA1/HPCA/HPN/INSIG1/JAG1/KCNK2/LHX3/LIN7A/LRIG1/MAF/MCOLN3/MYCL/MYO15A/MYO3A/NAGLU/NEUROG1/NOTCH1/NTN1/PAFAH1B1/PAX2/PAX8/PDZD7/PHOX2B/POU3F4/POU4F3/PROX1/PTPN11…	87
GO:0009185	BP	GO:0009185	ribonucleoside diphosphate metabolic process	65/5894	139/18866	8.69e-05	0.00115891	0.000761051	AAAS/AK1/AK5/ALDOA/ALDOC/AMPD3/ARNT/BAD/BPGM/CBFA2T3/DLG1/EIF6/ENO3/ENTPD2/ENTPD4/EP300/ESRRB/GAPDH/GAPDHS/GCK/GPD1/GPI/HDAC4/HKDC1/HTR2A/IFNG/INS/INSR/MLXIPL/MPP1/MYOG/NUDT18/NUDT9/NUP188/NUP214/NUP54/NUP88/NUP98/NUPR1/OGDH/OGDHL/OGT/P2RX7/PFKFB1/PFKFB3/PFKFB4/PFKL/PFKP/PGAM1/PGK1/PGK2/PKLR/POM121/PPARA/PRKAA1/PRKAG2/PSEN1/RANBP2/SEC13/SEH1L/SIRT6/SLC4A1/STAT3/TPI1/TPR	65
GO:0051090	BP	GO:0051090	regulation of DNA-binding transcription factor activity	180/5894	455/18866	8.69e-05	0.00115891	0.000761051	ADCY1/ADCY8/ADORA3/AGER/AGT/ANXA4/ARHGEF2/ARHGEF5/ATF2/BEX1/BTK/CAMK2A/CAPN3/CARD8/CARF/CAV1/CCDC22/CD200/CD36/CD40LG/CDKN2A/CEBPG/CHUK/CIB1/CRTC1/CRTC3/CSF3/CTH/CTNNB1/CX3CL1/CYLD/CYP1B1/CYTL1/EDA/EDA2R/EDN1/EGLN1/EP300/EPHA5/ERC1/ESR1/ESR2/FAF1/FLNA/FLOT2/FOSL1/FOXA1/FOXH1/FOXJ1/FOXP3/G3BP2/GAS6/GFI1/HAND1/HAND2/HCLS1/HDAC2/HDAC4/HES1/HEYL/ID1/ID2/IKBKB/IL18R1/IL18RAP/IL1B/IL5/IL6/INS/IRAK3/JUP…	180
GO:0002065	BP	GO:0002065	columnar/cuboidal epithelial cell differentiation	58/5894	121/18866	8.73e-05	0.00116153	0.000762775	ABL1/ARNTL/ASCL1/ATOH1/B9D1/BAD/BMP2/BMP4/BMP5/BMP6/CBFA2T2/CDH2/CDKN1A/CDX2/EMX1/FASN/FGF8/FGFR1/FGFR2/FOXA1/GATA4/GSK3A/HES1/HEY2/HOXA5/IL13/INSM1/JAG1/MCOLN3/MYCL/NKX2-2/NKX3-2/NOTCH1/PAFAH1B1/PAX6/PDX1/PDZD7/POU4F3/PROX1/PYY/RARA/RBPJ/RFX3/ROS1/RXRA/SCRIB/SIDT2/SLC4A7/SMO/SOD1/SRC/TMEM231/USH1C/WNT11/WNT4/WNT5A/YAP1/YIPF6	58
GO:0007190	BP	GO:0007190	activation of adenylate cyclase activity	24/5894	39/18866	9.1e-05	0.00120623	0.000792126	ACR/ADCY1/ADCY2/ADCY7/ADCY8/ADCY9/ADCYAP1/ADORA3/ADRB1/ADRB2/ADRB3/AVPR2/CALCA/CAP1/CRHR1/DRD1/DRD5/FSHR/GHRHR/GIPR/GLP1R/LHCGR/TSHR/VIPR2	24
GO:0007210	BP	GO:0007210	serotonin receptor signaling pathway	24/5894	39/18866	9.1e-05	0.00120623	0.000792126	CHRM2/CHRM3/CHRM4/CHRM5/DRD4/HRH2/HRH3/HRH4/HTR1A/HTR1B/HTR1D/HTR1E/HTR1F/HTR2A/HTR2B/HTR2C/HTR3A/HTR4/HTR5A/HTR6/HTR7/OR10H1/OR10H2/OR10H3	24
GO:0097756	BP	GO:0097756	negative regulation of blood vessel diameter	44/5894	86/18866	9.17e-05	0.00121282	0.000796452	ACE/ADM/ADORA1/ADRA1A/ADRA1B/ADRA2A/ADRA2B/ADRA2C/AGT/AVP/AVPR1A/AVPR1B/AVPR2/BMPR2/CASR/CAV1/CHRM3/COMP/CRP/DBH/DOCK5/DRD5/EDN1/FGB/GJA1/GJA5/GRIP2/HRH2/HTR1A/HTR1B/HTR1D/HTR2A/HTR2B/HTR7/INS/KCNMB2/KCNMB4/KEL/LEP/OXTR/PTAFR/PTGS2/SLC8A1/TRPM4	44
GO:0006821	BP	GO:0006821	chloride transport	54/5894	111/18866	9.2e-05	0.00121446	0.000797531	ANO2/ANO3/BEST1/BEST2/CA2/CA7/CASR/CLCA1/CLCA2/CLCC1/CLCN1/CLCN4/CLCN5/CLCN6/CLCNKB/CLIC1/CLIC2/FXYD3/GABRA1/GABRA2/GABRA3/GABRA4/GABRA5/GABRB1/GABRB2/GABRB3/GABRD/GABRG2/GABRG3/GABRQ/GABRR2/GLRA1/GLRA2/GLRA3/GLRB/GRM5/P2RY4/PRKG2/PTAFR/SLC12A1/SLC12A2/SLC12A3/SLC12A4/SLC12A5/SLC17A7/SLC1A1/SLC1A3/SLC26A1/SLC26A10/SLC26A3/SLC26A4/SLC4A1/SLC4A10/SLC4A8	54
GO:0010862	BP	GO:0010862	positive regulation of pathway-restricted SMAD protein phosphorylation	28/5894	48/18866	9.34e-05	0.00122133	0.000802041	ACVR1B/BMP10/BMP2/BMP3/BMP4/BMP5/BMP6/BMP8A/BMP8B/BMPR1A/BMPR2/CSNK2B/ENG/GDF11/GDF15/GDF2/GDF3/GDF5/GDF9/HFE/INHA/INHBC/INHBE/LEFTY1/MSTN/SDCBP/SMAD4/TGFB2	28
GO:0062237	BP	GO:0062237	protein localization to postsynapse	28/5894	48/18866	9.34e-05	0.00122133	0.000802041	ADAM22/CACNG2/CACNG3/CACNG4/CACNG5/DAG1/DLG1/DLG4/GHSR/GPC4/GPHN/GRIN1/GRIN2A/GRIN2C/GRIP1/GRIP2/HRAS/IQSEC2/KIF17/KIF5A/KIF5B/MAPK10/PRKCZ/RAPSN/SCRIB/SNAP25/STX3/VPS35	28
GO:0045921	BP	GO:0045921	positive regulation of exocytosis	46/5894	91/18866	9.37e-05	0.00122133	0.000802041	AP1G1/ATP6AP1/CACNA1D/CACNA1G/CACNA1I/CADPS/CADPS2/CD177/CDK5R2/CLASP1/DNM1L/DOC2B/F2RL1/FGB/FGR/HGS/HYAL3/IFNG/IL13/IL4/IL4R/LAMP1/NCS1/NPPA/PLA2G3/PLA2G6/PTAFR/RAB3A/RAB3D/RAB7A/SCAMP5/SDC1/SDC4/SDCBP/SLC4A8/SNCA/SNF8/SPHK2/STAM/STX4/STXBP1/SYK/SYT1/VAMP7/VPS4A/VSNL1	46
GO:0051899	BP	GO:0051899	membrane depolarization	46/5894	91/18866	9.37e-05	0.00122133	0.000802041	ABCD1/ABL1/BCL2/BEST2/CACNA1B/CACNA1C/CACNA1D/CACNA1E/CACNA1G/CACNA1I/CACNA2D1/CACNB3/CACNG2/CACNG4/CAV1/CAV3/CCK/CHRNA6/CHRNB2/DCN/EDN1/FGF12/FZD9/GJA5/HCN4/KCNJ2/KDR/NEDD4L/NPFF/NTSR1/P2RX7/PRKCZ/RANGRF/SCN10A/SCN11A/SCN1A/SCN1B/SCN2A/SCN3A/SCN3B/SCN4A/SCN5A/SCN8A/SLC8A1/SRC/TRPM4	46
GO:1903350	BP	GO:1903350	response to dopamine	46/5894	91/18866	9.37e-05	0.00122133	0.000802041	ABL1/ATF4/CALY/CHRM2/CHRM3/CHRM4/CHRM5/DNM2/DRD1/DRD2/DRD3/DRD4/DRD5/FLNA/GABPA/GNA11/GNAL/GNAS/GSK3A/HDAC2/HRH2/HRH3/HRH4/HTR1A/HTR1B/HTR1D/HTR1E/HTR1F/HTR2A/HTR2B/HTR2C/HTR3A/HTR4/HTR5A/HTR6/HTR7/ID1/MAPK1/OPRM1/OR10H1/OR10H2/OR10H3/PTGER1/RGS4/RGS9/VPS35	46
GO:2000177	BP	GO:2000177	regulation of neural precursor cell proliferation	46/5894	91/18866	9.37e-05	0.00122133	0.000802041	ADCYAP1/APPL2/ASCL1/BDNF/CDH2/CDON/CEND1/CTNNB1/CX3CL1/DCT/DISC1/DRD2/EGF/ELL3/EMX1/FLNA/FOXG1/FOXO1/FZD3/FZD9/GNAI2/GPR37L1/ID2/INSM1/LHX1/LHX5/LRP2/NES/NF1/NOTCH1/NR2E1/PAX6/PITX3/PROX1/PTBP2/RAPGEF1/SHH/SIRT2/SIX3/SLC16A2/SMO/SPINT2/TP53/VEGFC/WNT5A/ZNF335	46
GO:1990778	BP	GO:1990778	protein localization to cell periphery	139/5894	340/18866	9.49e-05	0.00123505	0.000811056	ABCA2/ACTB/ACTN2/ADAM22/ADIPOQ/AKAP5/AKT2/AMN/ANK1/AP4M1/ARFRP1/ARL3/ATP2B4/ATP2C2/BAG4/BBS1/BCL2L1/C16orf70/C2CD5/CACNB3/CACNG2/CACNG3/CACNG4/CACNG5/CAV1/CAV3/CDH1/CDH2/CIB1/CLN3/CNPY4/CSRP3/DAG1/DCHS1/DLG1/DLG4/EFR3B/EHD1/EHD2/EHD4/EPB41L2/FGF13/FLNA/FLOT2/GAS6/GGA1/GGA3/GHSR/GNAI1/GOLGA7/GOLPH3/GORASP2/GPC4/GPHN/GRIN1/GRIN2A/GRIN2C/GRIP1/GRIP2/HRAS/IFNG/IKBKB/INPP5K/INS/IQSEC2/JUP/KCNB2/KIF13A…	139
GO:0050670	BP	GO:0050670	regulation of lymphocyte proliferation	95/5894	219/18866	9.62e-05	0.00124895	0.00082018	AGER/AIF1/ATM/BCL2/BMP4/BST1/BTK/BTN2A2/CASP3/CCL5/CCR2/CD1D/CD209/CD28/CD3E/CD40LG/CD46/CD6/CD70/CD74/CDKN1A/CHRNB2/CRTAM/CTNNB1/DLG1/DLG5/EBI3/EPO/FCGR2B/FLT3LG/FOXJ1/FOXP3/GAL/GLMN/GNRH1/GPR183/HES1/HHLA2/HLA-DMB/HLA-DPA1/HLA-DPB1/HLA-E/IGFBP2/IKZF3/IL12B/IL12RB1/IL13/IL15/IL1B/IL21/IL23A/IL4/IL5/IL6/IRS2/JAK3/LEP/LGALS9/LMO1/LRRC32/LST1/MIF/NCK1/NCKAP1L/NDFIP1/PDCD1LG2/PKN1/PLA2G2D/PLA2G2F/PN…	95
GO:0046164	BP	GO:0046164	alcohol catabolic process	31/5894	55/18866	9.82e-05	0.00127243	0.000835602	AKR1B10/AKR1D1/ALDH1B1/BPNT1/CEL/CYP27A1/CYP39A1/CYP46A1/CYP7A1/GK/GK2/GPD2/HAO1/IMPA1/INPP5B/INPP5J/INPP5K/MT3/MTMR7/NTSR1/OCRL/PTEN/SCARF1/SNX17/SORD/SRD5A3/SULT1A1/SULT1A2/SYNJ1/SYNJ2/TPI1	31
GO:0046474	BP	GO:0046474	glycerophospholipid biosynthetic process	99/5894	230/18866	9.95e-05	0.00128632	0.000844722	ABHD3/ABHD4/ABHD8/ACHE/AGAP2/AGPAT1/AGPAT3/AGPAT4/ALOX15/ALPI/APOA2/ARF3/ATM/CDIPT/CDS2/CEPT1/CHAT/CHKA/CLN3/CPNE6/CPNE7/CSNK2B/DDHD2/DGKE/DGKG/DGKH/DGKQ/DPM3/ETNK1/ETNK2/FABP3/FABP5/GPD1/HTR2A/HTR2B/HTR2C/IMPA1/INPP4B/INPP5J/INPP5K/LCAT/LPCAT3/LPCAT4/MBOAT7/MPPE1/MTM1/MTMR1/MTMR12/MTMR6/MTMR7/MTMR9/NR1H4/OCRL/PCTP/PCYT1B/PCYT2/PDGFB/PEMT/PGAP2/PI4KA/PI4KB/PIGA/PIGB/PIGG/PIGK/PIGL/PIGP/PIGQ/PIGV/…	99
GO:0048193	BP	GO:0048193	Golgi vesicle transport	151/5894	374/18866	0.000100662	0.0012967	0.000851539	ACTR10/AMN/ANK1/ANKFY1/ANKRD28/AP1AR/AP1G1/AP3D1/AP4M1/ARCN1/ARF3/ARF5/ARFGAP2/ARFGEF2/ARFRP1/ARL3/ATP9A/BBS1/BET1L/BICD2/BNIP1/C16orf70/CAPZA1/CAPZA2/CCDC22/CCDC91/CLN3/CNIH3/COG4/COG5/COG7/COPB1/COPE/COPZ1/CSNK1D/CTAGE1/CUX2/CYTH3/DCTN1/DCTN4/DCTN5/DCTN6/DNM2/DYNC1LI1/DYNC1LI2/ERGIC2/ERGIC3/EXOC2/EXOC6B/F2/F5/F7/F8/F9/GAS6/GBF1/GCC2/GGA1/GGA3/GOLGA3/GOLGA5/GOLGA7/GOLGB1/GOLPH3/GOSR1/GOSR2/GRIA1…	151
GO:1902275	BP	GO:1902275	regulation of chromatin organization	86/5894	195/18866	0.00010067	0.0012967	0.000851539	AKAP8L/APOBEC1/ASF1A/ATAD2B/ATF7IP/ATG5/ATM/ATRX/BRD7/CDK9/CTBP1/CTNNB1/CTR9/EID1/FOXP3/GATA3/GCG/GFI1/GLYR1/HIRA/HMGA1/IL1B/ING2/ISL1/JARID2/KAT7/KDM3A/KDM4C/KDM4D/KDM5A/KMT2A/KMT2B/LIF/MAP1S/MECP2/METTL4/MLLT3/MTHFR/MYB/NAP1L2/NIPBL/NOS1/NSD1/OGT/OTUB2/PADI2/PAF1/PARG/PAX7/PHF1/PHF2/PHF8/PIH1D1/PRDM12/PRDM9/PRKD1/PRKD2/RNF40/RPS6KA4/RPS6KA5/RTF1/SETD1A/SETD5/SIRT6/SKI/SMAD4/SMARCB1/SNCA/SPHK2/S…	86
GO:0060260	BP	GO:0060260	regulation of transcription initiation from RNA polymerase II promoter	23/5894	37/18866	0.000102026	0.00131055	0.000860633	ATF7IP/CREB1/ERCC1/ERCC6/ESR1/HEY2/HNF1A/MED12/MED13/MED14/MED24/MED4/NKX2-5/PSMC3/PSMC4/PSMC5/PSMC6/SRF/SUB1/THRA/TP53/WNT10B/ZNF451	23
GO:0032388	BP	GO:0032388	positive regulation of intracellular transport	96/5894	222/18866	0.00010215	0.00131055	0.000860633	ACTN2/AKAP5/AKT2/ARIH2/ATG13/ATP2A1/BAD/BAG3/BAP1/BCAS3/BCL2/C2CD5/CACNB3/CASP8/CDC42/CDH1/CDK5R1/CIB1/EDEM1/EHD1/EHD2/EMD/FLNA/FYN/FZD5/GAS6/GSK3A/HCLS1/HDAC3/HPCA/HRAS/HSPA1L/HUWE1/HYAL2/IFNG/IL1B/IPO5/JUP/KIF5B/LEP/MAP2/MAPK1/MAVS/MDM2/MFF/MLC1/MYO1C/NEDD4/NRDE2/NUMA1/PCNT/PDCD5/PDZK1/PIK3R2/PPM1A/PPP3R1/PRKAA1/PRKACA/PSEN1/PTGS2/RAB21/RAN/RBM22/RBM26/RDX/RIOK2/SAR1A/SEC16A/SFN/SHH/SMAD3/SMO/S…	96
GO:0099601	BP	GO:0099601	regulation of neurotransmitter receptor activity	41/5894	79/18866	0.000104156	0.00133365	0.000875805	ACTN2/ADRB2/ARC/BEGAIN/CACNG2/CACNG3/CACNG4/CACNG5/CCL2/CCR2/CNIH3/CRH/CRHBP/DAPK1/DLG1/DLG4/DLGAP1/DLGAP2/DLGAP4/FNTA/GRIA1/GRIA2/GRIA3/GRIA4/GRIN1/GRIN2A/GRIN2B/IFNG/MAPK8IP2/MINK1/NLGN3/NPTX1/NPTX2/NPTXR/OPRM1/PTK2B/RASGRF1/RGS9/SHANK1/SLC6A9/SRC	41
GO:0022037	BP	GO:0022037	metencephalon development	55/5894	114/18866	0.000105642	0.00135001	0.000886545	ABL1/AGTPBP1/AGTR2/AIF1/ARCN1/ASCL1/BCL2/CBLN1/CD3E/CDK5R1/CDK5R2/CEND1/CLP1/CNTN1/CRK/CRKL/DAB1/FCGR2B/FOXC1/GBX1/GBX2/GRIN1/HAP1/HERC1/HNRNPD/HOXB1/KCNC1/LHX1/LHX5/LRP6/MECP2/NAGLU/NEUROD2/NLGN4X/OPHN1/PHOX2A/PROX1/PSEN1/PTBP2/PTPN11/PTPRS/SCN5A/SCRIB/SEZ6L/SLC25A46/SMO/SSTR1/SSTR2/SSTR3/TP53/TTBK2/TTLL1/WNT1/WNT7A/XRCC1	55
GO:0071322	BP	GO:0071322	cellular response to carbohydrate stimulus	67/5894	145/18866	0.000107186	0.00136704	0.000897732	AACS/ADCY8/ADRA2A/AGER/BAD/BAIAP3/BRSK2/CALCRL/CASR/CDK16/CLEC7A/COLEC12/CPB2/CRH/CYP7A1/ENDOG/EPHA5/ERN1/FKBP1B/GAS6/GATA4/GCG/GHRHR/GPLD1/GPR27/GPR68/GRIK5/HMGN3/IRS2/KIF5B/LEP/LIN28A/LRP1/MAP2K6/MLXIPL/MPC2/NADK/NR1H4/PAX2/PCK1/PDK3/PDX1/PIH1D1/PLA2G6/POLG/PPP3CA/PPP3CB/PRKAA1/PRKACA/PRKCE/RAB11B/RAB11FIP5/RAC1/SIDT2/SLC29A1/SLC2A5/SMARCA4/SMARCB1/SRF/STAR/STX4/SYBU/TH/TRPM4/VSNL1/ZFP36L1/ZNF2…	67
GO:0032890	BP	GO:0032890	regulation of organic acid transport	36/5894	67/18866	0.000107527	0.0013687	0.000898823	ABCB11/ADORA1/AGT/AGTR2/AKT2/AVP/AVPR1A/AVPR1B/CCK/CYP4A11/CYP4F2/EDN1/FABP3/HRH3/HTR1B/IL1B/IRS2/LEP/MAP2K6/MIF/NPY5R/NTSR1/OXT/P2RX7/PLA2G6/PLA2R1/PSEN1/RAB3GAP1/RGS4/SLC12A2/SLC38A3/SSTR4/STXBP1/SYK/TNFSF11/TRH	36
GO:0018958	BP	GO:0018958	phenol-containing compound metabolic process	53/5894	109/18866	0.000108216	0.00137477	0.000902807	AGTR2/AOC2/ASIP/BCL2/CGA/CHRNB2/CITED1/COMT/DAO/DBH/DCT/DDC/DIO3/DRD1/DRD2/DRD3/DRD4/EPAS1/FAH/GATA3/GCH1/GCNT4/GRIN2A/HAND2/HDC/HPN/HTR1A/INSM1/PAX8/PDE1B/PMEL/PNMT/SLC16A2/SLC45A2/SLC5A5/SLC6A3/SLCO1C1/SNCA/SNCB/STAR/SULT1A1/SULT1A2/TACR3/TG/TGFB2/TH/TPH1/TPO/TRPC1/TYR/TYRP1/VPS35/WNT5A	53
GO:0051048	BP	GO:0051048	negative regulation of secretion	84/5894	190/18866	0.000108745	0.0013769	0.000904203	ADIPOQ/ADORA1/ADRA2A/ADRA2B/ADRA2C/ADTRP/AGTR2/ASIC1/AVPR2/BCR/BMP8A/BTN2A2/CARTPT/CCR2/CD200/CD74/COMT/CRH/CRHBP/CYP4F2/DRD2/DRD3/DRD4/EDN1/EGF/ERP29/FCGR2B/FKBP1B/FOXP3/GHSR/GJA1/GNAI2/HADH/HDAC9/HRH3/HTR1B/IDH2/IL12B/IL1B/INHA/INS/KALRN/LEP/LGALS9/LIF/LRRC32/MTNR1B/NEUROG1/NF1/NOTCH1/NPFF/NPVF/NPY2R/NPY5R/OPRM1/OSM/OXT/OXTR/P2RY1/PFKL/PLA2R1/PPP3CA/PSMD9/PTGER3/PTGER4/PTPN11/RAB11FIP5/RAB7A/RE…	84
GO:0090316	BP	GO:0090316	positive regulation of intracellular protein transport	81/5894	182/18866	0.000108947	0.0013769	0.000904203	AKAP5/AKT2/ARIH2/ATG13/BAD/BAG3/BAP1/BCAS3/BCL2/C2CD5/CACNB3/CASP8/CDC42/CDH1/CDK5R1/CIB1/EDEM1/EMD/FLNA/FYN/FZD5/GAS6/GSK3A/HCLS1/HDAC3/HPCA/HRAS/HSPA1L/HUWE1/HYAL2/IFNG/IL1B/IPO5/JUP/KIF5B/LEP/MAPK1/MAVS/MDM2/MFF/MYO1C/PCNT/PDCD5/PDZK1/PIK3R2/PPM1A/PPP3R1/PRKAA1/PRKACA/PSEN1/PTGS2/RAN/RBM22/RIOK2/SAR1A/SEC16A/SFN/SHH/SMAD3/SMO/SORL1/SREBF2/TARDBP/TCF7L2/TENM1/TFDP1/TM9SF4/TMEM30A/TMEM30B/TP53/T…	81
GO:0002674	BP	GO:0002674	negative regulation of acute inflammatory response	11/5894	13/18866	0.000109446	0.0013769	0.000904203	ADCYAP1/ADORA1/APCS/ASH1L/FCGR2B/GSTP1/IL4/INS/NLRP3/NPY5R/PPARG	11
GO:0006703	BP	GO:0006703	estrogen biosynthetic process	11/5894	13/18866	0.000109446	0.0013769	0.000904203	CYP19A1/HSD17B1/HSD17B11/HSD17B12/HSD17B14/HSD17B2/HSD17B7/HSD17B8/HSD3B1/RDH8/STAR	11
GO:0021984	BP	GO:0021984	adenohypophysis development	11/5894	13/18866	0.000109446	0.0013769	0.000904203	BMP2/DRD2/FGF8/GHRH/GHRHR/HES1/POU1F1/PROP1/SLC6A3/SOX2/WNT4	11
GO:0016202	BP	GO:0016202	regulation of striated muscle tissue development	70/5894	153/18866	0.000111349	0.00139612	0.000916829	AKIRIN1/ARNTL/BCL2/BMP10/BMP2/BMP4/BMPR1A/CAV3/CDON/CREB1/CTDP1/CTNNB1/CXADR/CYP26B1/DDX17/DKK1/EDN1/EFNB2/EPHB1/ERBB4/FBXO22/FGF20/FGF3/FGF8/FGF9/FGFR1/FGFR2/FRS2/FZD7/GJA1/GPC1/GSK3A/HDAC4/HDAC9/HEY2/JARID2/KCNK2/LUC7L/MAPK1/MAPK11/MSTN/MTM1/MTOR/MYF5/MYF6/MYOD1/MYOG/NKX2-5/NOTCH1/PIN1/PPARA/PRKAA1/PTEN/RBP4/RBPJ/RGS4/SHH/SIRT2/SMAD3/SMAD4/SOX15/TBX1/TBX2/TLL2/TP73/USP19/WNT10B/YAP1/YBX3/ZFPM2	70
GO:0030326	BP	GO:0030326	embryonic limb morphogenesis	60/5894	127/18866	0.000111621	0.00139612	0.000916829	ALDH1A2/ALX1/ALX3/ALX4/B9D1/BMP4/BMPR1A/CACNA1C/CHD7/CREBBP/CTNNB1/CYP26B1/DKK1/DLX6/DYNC2H1/FBXW4/FGF4/FGF8/FGF9/FGFR1/FRAS1/GDF5/GJA5/GNAS/GPC3/GRHL2/HAND2/HDAC2/HOXD12/IFT122/IFT140/LRP4/LRP6/MBNL1/MEGF8/MSX1/MYH3/NIPBL/NOTCH1/OSR2/PBX2/PSEN1/PTCH1/ROR2/RUNX2/SALL1/SHH/SKI/SMAD4/TBX2/TBX3/TBX4/TFAP2A/TGFB2/TMEM231/TRAF3IP1/WDR19/WNT5A/WNT7A/ZNF358	60
GO:0035113	BP	GO:0035113	embryonic appendage morphogenesis	60/5894	127/18866	0.000111621	0.00139612	0.000916829	ALDH1A2/ALX1/ALX3/ALX4/B9D1/BMP4/BMPR1A/CACNA1C/CHD7/CREBBP/CTNNB1/CYP26B1/DKK1/DLX6/DYNC2H1/FBXW4/FGF4/FGF8/FGF9/FGFR1/FRAS1/GDF5/GJA5/GNAS/GPC3/GRHL2/HAND2/HDAC2/HOXD12/IFT122/IFT140/LRP4/LRP6/MBNL1/MEGF8/MSX1/MYH3/NIPBL/NOTCH1/OSR2/PBX2/PSEN1/PTCH1/ROR2/RUNX2/SALL1/SHH/SKI/SMAD4/TBX2/TBX3/TBX4/TFAP2A/TGFB2/TMEM231/TRAF3IP1/WDR19/WNT5A/WNT7A/ZNF358	60
GO:0051703	BP	GO:0051703	intraspecies interaction between organisms	30/5894	53/18866	0.00011402	0.00142338	0.00093473	ATXN1/AVP/AVPR1A/BBS4/BPIFA1/BRINP1/CHRNB2/DLG4/DRD3/DRD4/GAD1/GNB1L/GRIN1/GRPR/KALRN/LTF/MAPK8IP2/MECP2/MTOR/NLGN3/NLGN4X/NLGN4Y/NR2E1/NRXN2/OXT/OXTR/PTEN/SHANK1/TBX1/TH	30
GO:0030902	BP	GO:0030902	hindbrain development	71/5894	156/18866	0.000122045	0.00151771	0.000996677	ABL1/AGTPBP1/AGTR2/AHI1/AIF1/ALDH1A2/ARCN1/ASCL1/BCL2/BMP5/CBLN1/CD3E/CDK5R1/CDK5R2/CEND1/CLP1/CNTN1/CRK/CRKL/CTNNA2/CTNNB1/DAB1/EGF/FCGR2B/FLNA/FOXC1/GBX1/GBX2/GPR37L1/GRIN1/HAP1/HERC1/HES1/HNRNPD/HOXB1/HOXB2/HOXB3/KCNC1/LHX1/LHX5/LRP6/MECP2/NAGLU/NEUROD2/NEUROG3/NLGN4X/OPHN1/PHOX2A/PHOX2B/PROX1/PSEN1/PTBP2/PTPN11/PTPRS/RBFOX2/SCN5A/SCRIB/SEZ6L/SHH/SLC25A46/SMO/SSTR1/SSTR2/SSTR3/TBR1/TP53/TTBK2/…	71
GO:1901861	BP	GO:1901861	regulation of muscle tissue development	71/5894	156/18866	0.000122045	0.00151771	0.000996677	AKIRIN1/ARNTL/BCL2/BMP10/BMP2/BMP4/BMPR1A/CAV3/CDON/CREB1/CTDP1/CTNNB1/CXADR/CYP26B1/DDX17/DKK1/EDN1/EFNB2/EPHB1/ERBB4/FBXO22/FGF20/FGF3/FGF8/FGF9/FGFR1/FGFR2/FRS2/FZD7/GJA1/GPC1/GSK3A/HDAC4/HDAC9/HEY2/IGFBP5/JARID2/KCNK2/LUC7L/MAPK1/MAPK11/MSTN/MTM1/MTOR/MYF5/MYF6/MYOD1/MYOG/NKX2-5/NOTCH1/PIN1/PPARA/PRKAA1/PTEN/RBP4/RBPJ/RGS4/SHH/SIRT2/SMAD3/SMAD4/SOX15/TBX1/TBX2/TLL2/TP73/USP19/WNT10B/YAP1/YBX3…	71
GO:0008286	BP	GO:0008286	insulin receptor signaling pathway	66/5894	143/18866	0.000125333	0.00155562	0.00102157	AGT/AKT2/APC/ATP6AP1/ATP6V0A1/ATP6V0A2/ATP6V0D1/ATP6V0E2/ATP6V1A/ATP6V1B1/ATP6V1B2/ATP6V1E1/ATP6V1G1/ATP6V1H/BCAR3/C2CD5/CCND3/CSRP3/EIF4EBP1/FOXC2/FOXO1/FOXO4/FUT7/GNAI2/GPLD1/GPR21/GRB14/GRB2/GSK3A/IDE/IGFBP1/IL1B/INPP5K/INS/INSR/INSRR/IRS2/IRS4/LEP/MSTN/NCK1/NDEL1/NR1H4/OGT/PIK3R2/PRKAA1/PRKCQ/PRKCZ/PTPN1/PTPN11/PTPRA/PTPRE/RELA/RPE65/RPS6KB1/SIK2/SMARCC1/SNX5/SOGA1/SORL1/SOS1/SRC/TSC1/TSC2/ZB…	66
GO:0070304	BP	GO:0070304	positive regulation of stress-activated protein kinase signaling cascade	77/5894	172/18866	0.00012607	0.00156178	0.00102561	AGER/ANKRD6/ARHGEF5/BIRC7/BMP2/CCL21/CD40LG/CDC42/DKK1/EDA2R/EDAR/EDN1/EMC10/EPHA4/ERCC6/ERN1/ERN2/F2RL1/FCGR2B/FGD2/FLT4/FZD10/FZD5/FZD7/GADD45A/HAND2/HRAS/IL1B/IL26/LEP/LTBR/MAP2K7/MAP3K10/MAP3K12/MAP3K13/MAP3K2/MAP3K5/MAP3K6/MAP3K7/MAP4K5/MAPK8IP2/MAPK8IP3/MID1/MINK1/MMP8/NCF1/NOD1/NOX1/PKN1/PLCB1/PTK2B/PTPN1/PYCARD/RB1CC1/ROR2/SDCBP/SEMA3A/SERPINF2/SLAMF1/SPAG9/STK25/SYK/TAOK1/TAOK2/TGFB2/TLR…	77
GO:0060996	BP	GO:0060996	dendritic spine development	50/5894	102/18866	0.000129564	0.00160199	0.00105202	ACTR2/ARC/ARHGAP33/C21orf91/CAMK2A/CAMK2B/CAPRIN1/CDC42/CDK5R1/CDKL5/CTNND2/CUX2/DBN1/DISC1/DLG4/DLG5/DNM1L/DNM3/DOCK10/EPHA4/EPHB1/EPHB3/FSTL4/HDAC2/HDAC6/IQSEC1/ITPKA/KALRN/KIF1A/LLPH/MAPK6/MTOR/NEURL1/NLGN3/PAFAH1B1/PAK3/PAK4/PLK2/PPFIA2/PSEN1/PTEN/PTPRS/SHANK1/SIPA1L1/SLC12A5/SLC9A6/UBA6/UBE3A/WNT7A/ZMYND8	50
GO:0030516	BP	GO:0030516	regulation of axon extension	48/5894	97/18866	0.000130898	0.0016153	0.00106076	ABL1/ADNP/ANAPC2/ARHGAP4/BMPR2/CDH4/CDK5R1/CDKL3/CDKL5/DBN1/DISC1/DNM2/DPYSL2/DSCAM/IFRD1/KIAA0319/L1CAM/LRP1/MAG/MAP2/MAP3K13/MEGF8/MT3/NDEL1/NTN1/OLFM1/PAFAH1B1/POU4F2/PTPRS/RAB21/RNF6/RTN4/SEMA3A/SEMA3B/SEMA3D/SEMA4A/SEMA4G/SEMA6A/SEMA6B/SEMA6C/SEMA6D/SEMA7A/SRF/TNR/TRIM46/TRPC5/TWF2/WNT5A	48
GO:0046890	BP	GO:0046890	regulation of lipid biosynthetic process	90/5894	207/18866	0.000131139	0.0016153	0.00106076	ABCA2/ABCD1/ABCD2/ABHD6/ACADL/ADIPOQ/ADM/AGAP2/APOA4/APOC3/ASXL3/ATP1A1/AVP/AVPR1A/BMP2/BMP5/BMP6/C3/CD74/CGA/CREB1/CREBL2/CTDNEP1/CYP7A1/DGKQ/DKKL1/EIF6/ERLIN2/FABP3/FABP5/FASN/FDFT1/FGF1/FGFR4/FSHB/GFI1/GGPS1/GIP/GPLD1/H6PD/HMGCS1/HTR2A/HTR2B/HTR2C/IDH1/IDI1/IFNG/IL1B/INS/INSIG1/LDLR/LEP/LPCAT3/MBTPS2/MID1IP1/MLXIPL/MTOR/MVD/NFKB1/NFYB/NFYC/NR0B1/NR1H2/NR1H4/NR5A1/PCK1/PDGFB/PIBF1/PLA2G3/PLA2G6…	90
GO:0006109	BP	GO:0006109	regulation of carbohydrate metabolic process	91/5894	210/18866	0.000139432	0.00171419	0.00112571	AAAS/ADCYAP1R1/ADIPOQ/AKT2/ARNT/ARPP19/AVPR1B/BAD/C1QTNF1/C1QTNF3/CBFA2T3/COX11/DGKQ/DYRK2/EGF/EIF6/EP300/ESRRB/FOXO1/GAPDHS/GCG/GCGR/GCK/GNB3/GNMT/GPD1/GPLD1/GPT/GSK3A/HDAC4/HTR2A/IFNG/INPP5K/INS/INSR/IRS2/KHK/LCMT1/LEP/LHCGR/MLXIPL/MST1/MTOR/MYOG/NFKB1/NTSR1/NUP188/NUP214/NUP54/NUP88/NUP98/NUPR1/OGT/P2RX7/P2RY1/PASK/PDGFB/PDK3/PFKFB1/PFKFB3/PFKFB4/PGAM1/PGP/PHLDA2/POM121/POMC/POU1F1/PPARA/PPP1R…	91
GO:0051602	BP	GO:0051602	response to electrical stimulus	25/5894	42/18866	0.000140639	0.00172251	0.00113117	AIF1/BRD1/DISC1/EEF1A2/EPO/FZD3/GNAT1/GRM1/HNRNPD/HPCA/KCNJ3/MSTN/MYOG/NEUROD2/NQO1/NTRK1/OXT/P2RX7/PTEN/RAB3A/REST/RPE65/S100A13/SRC/TH	25
GO:0070482	BP	GO:0070482	response to oxygen levels	158/5894	396/18866	0.000140654	0.00172251	0.00113117	ACTN4/ADAM15/ADIPOQ/ADM/ADORA1/AGER/AHCY/ALAS2/ANGPT4/ANGPTL4/ANKRD1/APAF1/ARNT/ARNT2/ASCL2/ATF4/ATG7/ATM/ATP6AP1/ATP6V0A2/ATP6V0D1/ATP6V1A/ATP6V1G1/B3GAT1/BAD/BCL2/BMP2/BNIP1/BNIP3L/CACNB3/CASP3/CASR/CAV1/CBFA2T3/CBL/CDKN1A/CDKN1B/CHRNB2/CLCA1/CLDN3/CREB1/CREBBP/CUL2/CYB5R4/DNM1L/DNMT3A/DRD2/EDN1/EGLN1/EGLN3/EIF4EBP1/ENDOG/EP300/EPAS1/EPO/ERCC2/ETS1/F7/FABP1/FOXO1/HDAC2/HIF1AN/HP1BP3/HSD11B2/HYO…	158
GO:0046184	BP	GO:0046184	aldehyde biosynthetic process	12/5894	15/18866	0.000141309	0.00172251	0.00113117	BMP2/BMP5/BMP6/CYP11B1/CYP11B2/KDM3A/PDXK/PNPO/REST/TKT/TPI1/WNT4	12
GO:2000846	BP	GO:2000846	regulation of corticosteroid hormone secretion	12/5894	15/18866	0.000141309	0.00172251	0.00113117	AGT/AGTR2/BMP6/C1QTNF1/CRH/CRHR1/GAL/GALR1/POMC/PTPN11/REN/TAC1	12
GO:0006096	BP	GO:0006096	glycolytic process	55/5894	115/18866	0.000141438	0.00172251	0.00113117	AAAS/ALDOA/ALDOC/ARNT/BPGM/CBFA2T3/EIF6/ENO3/EP300/ESRRB/GAPDH/GAPDHS/GCK/GPD1/GPI/HDAC4/HKDC1/HTR2A/IFNG/INS/INSR/MLXIPL/MYOG/NUP188/NUP214/NUP54/NUP88/NUP98/NUPR1/OGDH/OGDHL/OGT/P2RX7/PFKFB1/PFKFB3/PFKFB4/PFKL/PFKP/PGAM1/PGK1/PGK2/PKLR/POM121/PPARA/PRKAA1/PRKAG2/PSEN1/RANBP2/SEC13/SEH1L/SIRT6/SLC4A1/STAT3/TPI1/TPR	55
GO:0071241	BP	GO:0071241	cellular response to inorganic substance	95/5894	221/18866	0.000143947	0.00174978	0.00114907	ADCY1/ADCY10/ADCY7/ADCY8/ALOX15/ALOX5AP/AOC1/AQP2/ATF4/ATRX/BACE1/BAD/BMP6/CAPN3/CARF/CDH1/CDKN1B/CEBPA/CHUK/CPNE6/CPNE7/CREB1/CRHBP/CRK/CYP11B1/CYP11B2/CYP1A2/DLG4/DMTN/DNM2/DPEP1/EDN1/EIF2AK3/ENDOG/FABP4/FOXO1/GLRA1/GLRA2/GPLD1/GSK3A/HFE/HNRNPD/HPCA/ID2/IQGAP1/ITPKB/KCNA1/KCNC2/KCNH1/LGMN/LIG4/MAPK1/MAPK9/MCOLN1/MT1E/MT1F/MT1G/MT1H/MT1HL1/MT1M/MT1X/MT2A/MT3/MT4/MYOG/NCF1/NEUROD2/NFE2L2/NQO1/OGG…	95
GO:0008584	BP	GO:0008584	male gonad development	65/5894	141/18866	0.000146545	0.00177803	0.00116763	ADAM15/ADAM20/ADAM21/AMHR2/ARID4B/ATRX/BCL2/BCL2L1/CBL/CCND1/CRKL/CTSV/DMRT1/ERCC1/ESR1/FGF9/FLNA/FNDC3A/FSHB/FSHR/GATA1/GATA3/GATA4/HMGCS1/ING2/INHA/INSR/KDM5A/KITLG/LHCGR/LRP2/LRRC6/MAMLD1/NKX2-1/NR0B1/NR5A1/NTRK1/NUPR1/PLEKHA1/PRKACG/RAB13/RAD21L1/RARA/REN/RHOBTB3/SDC1/SEMA3A/SF1/SGPL1/SMAD4/SOX15/SOX9/SRD5A2/SRY/STAR/TEX11/TFAP2C/TGFB2/TMF1/WNT2B/WNT4/WNT5A/WT1/YBX3/ZFPM2	65
GO:0003151	BP	GO:0003151	outflow tract morphogenesis	41/5894	80/18866	0.000149609	0.00180843	0.00118759	ATF2/BMP4/BMPR1A/BMPR2/CRKL/CTNNB1/ELN/ENG/EYA1/FGF8/FGFR2/FOXC1/FOXC2/FOXH1/GJA5/HAND2/HES1/HEY2/HEYL/ISL1/JAG1/LRP2/NEDD4/NIPBL/NKX2-5/NOTCH1/NPY2R/NPY5R/RARA/RBPJ/ROBO1/SMAD4/SMAD6/SOX18/TBX1/TBX2/TBX3/TGFB2/WNT11/WNT5A/ZFPM2	41
GO:0035050	BP	GO:0035050	embryonic heart tube development	41/5894	80/18866	0.000149609	0.00180843	0.00118759	AHI1/BBS4/BBS7/CCDC40/CTNNB1/DNAAF1/ENG/FGF8/FOXC1/FOXC2/FOXH1/GATA4/GJA5/HAND1/HAND2/HES1/IFT122/IFT57/LBX1/MEGF8/MICAL2/NDRG4/NKX2-5/NOTCH1/OVOL2/PKD2/PSEN1/SHH/SMAD3/SMO/SOX18/SRF/TBR1/TBX2/TBX21/TBX3/TMED2/TRAF3IP1/WNT5A/YAP1/ZIC3	41
GO:0008209	BP	GO:0008209	androgen metabolic process	19/5894	29/18866	0.000150288	0.00181325	0.00119075	ADM/AKR1C4/AKR1D1/CYP17A1/CYP19A1/ESR1/HSD17B11/HSD17B3/HSD17B6/HSD17B7/HSD17B8/HSD3B1/HSD3B2/PLEKHA1/SGPL1/SHH/SRD5A2/SRD5A3/WNT4	19
GO:0006970	BP	GO:0006970	response to osmotic stress	43/5894	85/18866	0.000152924	0.00183208	0.00120312	ANXA7/APOBEC1/ARHGEF2/ATF2/AVP/BAD/CAPN3/CASP3/CLN3/DDX3X/DYSF/EPO/FMO1/ITGA2/LETM1/LRRC8E/MAP2K7/MAP7/MAPK10/MICU1/MLC1/NFAT5/OXT/PAPPA2/PKD2/PKN1/PTGS2/PTK2B/SCN2A/SLC12A2/SLC12A5/SLC2A4/SORD/TACR3/TH/TNF/TP53/TRPV4/TSC22D2/TSC22D4/XRCC5/YBX3/ZFP36L1	43
GO:0002067	BP	GO:0002067	glandular epithelial cell differentiation	28/5894	49/18866	0.000153281	0.00183208	0.00120312	ARNTL/ASCL1/BAD/BMP2/BMP4/BMP5/BMP6/FASN/FGF8/FGFR2/FOXA1/GSK3A/HES1/HOXA5/IL13/INSM1/NKX2-2/NOTCH1/PAX6/PDX1/PROX1/RARA/RFX3/RXRA/SIDT2/SMO/WNT4/WNT5A	28
GO:0002673	BP	GO:0002673	regulation of acute inflammatory response	28/5894	49/18866	0.000153281	0.00183208	0.00120312	ADCYAP1/ADORA1/APCS/ASH1L/BTK/C3/F12/FCGR2B/FFAR2/FUT7/GSTP1/HLA-E/IL1B/IL4/IL6/INS/NLRP3/NPY5R/OSM/PIK3CG/PLA2G2D/PPARG/PTGER3/PTGS2/RHBDD3/TAC1/TNF/TNFSF11	28
GO:0007595	BP	GO:0007595	lactation	28/5894	49/18866	0.000153281	0.00183208	0.00120312	APRT/ATP7B/CAV1/CCND1/CREB1/CSN2/CSN3/DHODH/ERBB4/FOXB1/GHRHR/KALRN/NCOR2/NEURL1/OXTR/PAM/PRL/PRLR/SERPINC1/SLC29A1/SLC6A3/SOCS2/STAT5A/STAT5B/USF2/VDR/XDH/ZBTB7B	28
GO:0048512	BP	GO:0048512	circadian behavior	28/5894	49/18866	0.000153281	0.00183208	0.00120312	ADORA1/ADRB1/AHCY/CHRNB2/CRH/CSF2/DRD2/DRD3/GHRH/GHRHR/GPR176/HCRTR2/ID2/KCNA2/MC3R/MTNR1B/MTOR/NAGLU/NPY2R/OPRL1/PER3/PTEN/SIX3/STAR/TH/TP53/USP2/ZFHX3	28
GO:0042471	BP	GO:0042471	ear morphogenesis	58/5894	123/18866	0.000153545	0.00183208	0.00120312	ATOH1/ATP6V1B1/ATP8A2/BCR/CELSR1/CHD7/CHRNA10/CHRNA9/DLX6/EDN1/EYA1/FGF8/FGF9/FGFR1/FGFR2/FOXG1/FOXI1/FRZB/FZD3/GATA3/GBX2/HESX1/HOXA1/HPN/INSIG1/LRIG1/MAPK1/MSX1/MYO15A/MYO3A/NAGLU/NEUROG1/NIPBL/NKX3-2/NTN1/OSR2/PAX2/PAX8/PDZD7/POU3F4/POU4F3/PRKRA/PROX1/ROR2/RPL38/SALL1/SCRIB/SIX2/SOD1/SOX9/SPRY2/TBX1/TCAP/TFAP2A/USH1C/WDR19/WNT1/WNT5A	58
GO:0043470	BP	GO:0043470	regulation of carbohydrate catabolic process	45/5894	90/18866	0.000154335	0.00183313	0.00120381	AAAS/ARNT/CBFA2T3/EIF6/EP300/ESRRB/GAPDHS/GCK/GPD1/GSK3A/HDAC4/HTR2A/IFNG/INS/INSR/MLXIPL/MYOG/NUP188/NUP214/NUP54/NUP88/NUP98/NUPR1/OGT/P2RX7/PFKFB1/PFKFB3/PFKFB4/PGAM1/POM121/PPARA/PPP1R3D/PRKAA1/PRKAG2/PSEN1/RANBP2/SCARB2/SEC13/SEH1L/SIRT6/SLC25A12/SLC4A1/STAT3/TP53/TPR	45
GO:0086002	BP	GO:0086002	cardiac muscle cell action potential involved in contraction	31/5894	56/18866	0.00015447	0.00183313	0.00120381	ATP1A1/BIN1/CACNA1C/CACNA1D/CACNA1G/CACNA2D1/CAV1/CAV3/CTNNA3/DLG1/DSP/FGF12/FLNA/GJA1/GJA5/JUP/KCNE1/KCNE4/KCNJ2/KCNJ3/KCNJ5/KCNJ8/KCNN2/NEDD4L/PKP2/SCN1A/SCN1B/SCN3B/SCN5A/SNTA1/TRPM4	31
GO:0051216	BP	GO:0051216	cartilage development	86/5894	197/18866	0.000154482	0.00183313	0.00120381	ACAN/ADAMTS7/AMELX/ANXA6/BMP10/BMP2/BMP3/BMP4/BMP5/BMP6/BMP8A/BMP8B/BMPR1A/BMPR1B/BMPR2/CD44/CER1/COL11A2/COMP/CTNNB1/CYTL1/EDN1/EFEMP1/EIF2AK3/ESRRA/EVC/FGF18/FGF4/FGF6/FGF9/FGFR1/FGFR3/FRZB/GDF2/GDF5/GNAS/GPLD1/HAND1/HAND2/HOXA5/HOXB3/HOXC4/HYAL1/HYAL2/HYAL3/ITGB8/LEP/LRP6/LTBP3/MAF/MATN1/MATN3/MEF2D/MEX3C/MGP/MSX1/MYF5/NKX3-2/NPPC/OSR2/PAX7/PTH/PTPN11/RARA/RELA/ROR2/RUNX2/SIX2/SMAD3/SMAD5/SNAI…	86
GO:0022409	BP	GO:0022409	positive regulation of cell-cell adhesion	116/5894	279/18866	0.000155082	0.00183689	0.00120628	ADAM19/AGER/AIF1/ALOX15/ALOX5/AP3D1/BAD/BTN2A2/CAV1/CCL2/CCL21/CCL5/CCR2/CD160/CD1D/CD209/CD28/CD3E/CD40LG/CD44/CD46/CD47/CD6/CD70/CD74/CDC42/CX3CL1/CYLD/DMTN/EBI3/EFNB2/EFNB3/EPO/ETS1/FGB/FLOT2/FOXA1/FOXP3/FUT4/FUT7/FYN/GATA3/GCNT2/GRAP2/GRB2/HES1/HHLA2/HLA-DMB/HLA-DPA1/HLA-DPB1/HLA-E/IFNG/IGFBP2/IL12B/IL12RB1/IL15/IL1B/IL21/IL23A/IL4/IL4R/IL6/IL7R/ITPKB/JAK1/JAK3/LEP/LGALS9/MALT1/MAP3K8/MYB/NCK…	116
GO:0010770	BP	GO:0010770	positive regulation of cell morphogenesis involved in differentiation	71/5894	157/18866	0.000155377	0.00183702	0.00120637	ABL1/ACTR2/ADNP/ANAPC2/ANKRD27/ARHGDIA/ARHGEF7/BDNF/BMPR2/C1QBP/CAMK2B/CAPRIN1/CASS4/CDC42/CDH4/CDKL3/CDKL5/CIB1/CRK/CRKL/CSPG5/CUL7/CUX2/DBN1/DISC1/DMTN/DNM1L/DNM2/DOCK1/DOCK5/DSCAM/EPHA4/FBXO31/FGB/FLNA/IST1/ITPKA/KALRN/L1CAM/LPAR3/LRP1/MAP3K13/MEGF8/METRN/NDEL1/NGF/NGFR/NIN/NTN1/OBSL1/OLFM4/PAFAH1B1/PAK3/PARP6/PLXNB2/POU4F2/PTPRD/RAB21/RAC1/RAC3/RND2/ROBO1/SEMA7A/SRF/STK11/STK25/TIAM2/TRPC5/TU…	71
GO:0002209	BP	GO:0002209	behavioral defense response	24/5894	40/18866	0.000160353	0.0018924	0.00124273	ADCYAP1/ASIC1/ASIC4/BCL2/BDNF/BRINP1/CCK/CRH/DRD1/DRD4/EP300/GABRA5/GJA1/GRIK2/HTR1A/HTR2C/MAPK8IP2/MECP2/MORC1/NEUROD2/NPY2R/NR2E1/PENK/VDAC3	24
GO:1902905	BP	GO:1902905	positive regulation of supramolecular fiber organization	90/5894	208/18866	0.000161	0.00189497	0.00124442	ABL1/ACTN2/ACTR2/ACTR3/ALOX15/ANKRD53/AP1AR/ARFIP2/ARHGEF10/ARHGEF15/ARHGEF5/ARL2/ARPC1A/ARPC4/ARPC5L/ARPIN/BAG4/BAIAP2L2/BIN1/BMP10/CAV3/CCL11/CCL21/CCL24/CD47/CDC42/CDC42EP1/CDC42EP2/CDK5R1/CDK5RAP2/CDKN1B/CLASP1/CORO1B/CSF3/CTNNA2/CX3CL1/DCTN1/DLG1/EDN1/F2RL1/FES/FLNA/GPR65/GPX1/GRB2/HIP1R/ID1/IQGAP2/MAGEL2/MECP2/MTOR/MYLK3/MYO1C/NAV3/NCK1/NCKAP1L/NIN/NPHS1/NUMA1/PFN1/PICK1/PPM1E/PPM1F/PRKCE/P…	90
GO:0007214	BP	GO:0007214	gamma-aminobutyric acid signaling pathway	18/5894	27/18866	0.000161448	0.00189497	0.00124442	ATF4/BDNF/GABBR2/GABRA1/GABRA2/GABRA3/GABRA4/GABRA5/GABRB1/GABRB2/GABRB3/GABRG2/GABRG3/GABRR2/GNAI2/PLCL1/PLCL2/SLC12A2	18
GO:0042501	BP	GO:0042501	serine phosphorylation of STAT protein	18/5894	27/18866	0.000161448	0.00189497	0.00124442	CDK5R1/GADD45A/IFNA1/IFNA10/IFNA14/IFNA16/IFNA17/IFNA2/IFNA4/IFNA5/IFNA7/IFNA8/IFNB1/IFNG/IFNW1/LIF/PWP1/RET	18
GO:0090494	BP	GO:0090494	dopamine uptake	13/5894	17/18866	0.000163013	0.0019089	0.00125357	DRD1/DRD2/DRD3/DRD4/GDNF/RAB3B/SLC22A1/SLC22A2/SLC22A3/SLC6A2/SLC6A3/SNCA/TOR1A	13
GO:0008654	BP	GO:0008654	phospholipid biosynthetic process	113/5894	271/18866	0.000163224	0.0019089	0.00125357	ABCA2/ABHD3/ABHD4/ABHD8/ACHE/AGAP2/AGPAT1/AGPAT3/AGPAT4/ALOX15/ALPI/APOA2/ARF3/ATM/CDIPT/CDS2/CEPT1/CHAT/CHKA/CLN3/CPNE6/CPNE7/CSNK2B/DDHD2/DGKE/DGKG/DGKH/DGKQ/DOLK/DOLPP1/DPAGT1/DPM3/ETNK1/ETNK2/FABP3/FABP5/GGPS1/GPD1/HMGCS1/HTR2A/HTR2B/HTR2C/IDH1/IDI1/IMPA1/INPP4B/INPP5J/INPP5K/LCAT/LPCAT3/LPCAT4/MBOAT7/MPPE1/MTM1/MTMR1/MTMR12/MTMR6/MTMR7/MTMR9/MVD/NR1H4/OCRL/PCTP/PCYT1B/PCYT2/PDGFB/PEMT/PGAP2/…	113
GO:1903829	BP	GO:1903829	positive regulation of cellular protein localization	137/5894	338/18866	0.000167715	0.00195788	0.00128573	ABCA7/AKAP5/AKT2/APC/ARIH2/ATG13/ATP2B4/BAD/BAG3/BAP1/BCAS3/BCL2/C2CD5/CACNB3/CACNG2/CASP8/CD247/CDC42/CDH1/CDK5R1/CEP250/CIB1/CLN3/CNPY4/CROCC/CYLD/DLG1/EDEM1/EGF/EIF2AK3/EMD/EPB41L2/ERBB4/F2/FLNA/FYN/FZD5/GAS6/GNAI1/GSK3A/HCLS1/HDAC3/HPCA/HRAS/HSPA1L/HUWE1/HYAL2/IFNG/IL1B/INS/IPO5/IQGAP1/JUP/KAT7/KIF5B/LAMTOR5/LARP7/LEP/LIF/LRIG2/LRP1/LRP4/MAPK1/MARK4/MAVS/MCRS1/MDM2/MFF/MGAT3/MYO1C/NECAB2/NGFR…	137
GO:0051495	BP	GO:0051495	positive regulation of cytoskeleton organization	98/5894	230/18866	0.000169244	0.00197218	0.00129513	ABL1/ACTN2/ACTR2/ACTR3/ALOX15/ANKRD53/AP1AR/ARFIP2/ARHGEF10/ARHGEF15/ARHGEF5/ARL2/ARPC1A/ARPC4/ARPC5L/ARPIN/BAG4/BAIAP2L2/BCAS3/BIN1/BMP10/CAV3/CCL11/CCL21/CCL24/CCL27/CD47/CDC42/CDC42EP1/CDC42EP2/CDK5R1/CDK5RAP2/CDKN1B/CENPJ/CLASP1/CORO1B/CSF3/CTNNA2/CX3CL1/DCTN1/DLG1/EDN1/F2RL1/FES/FLNA/GPR65/GRB2/HAX1/HCLS1/HIP1R/HRAS/ID1/IQGAP2/MAGEL2/MECP2/MTOR/MYLK3/MYO1C/NAV3/NCK1/NCKAP1L/NES/NIN/NPHS1/NSF…	98
GO:0002703	BP	GO:0002703	regulation of leukocyte mediated immunity	91/5894	211/18866	0.000170751	0.00198335	0.00130246	AGER/AP1G1/BCR/BTK/C3/C4BPA/C4BPB/CCR2/CD160/CD177/CD1B/CD1D/CD226/CD28/CD96/CR1/CRK/CRTAM/DDX1/F2RL1/FCGR2B/FES/FGR/FOXJ1/FOXP3/FUT7/FZD5/GATA3/HFE/HLA-E/HPX/IFNA2/IFNB1/IL12B/IL12RB1/IL13/IL18R1/IL18RAP/IL1B/IL1R1/IL21/IL23A/IL4/IL4R/IL6/IL7R/JAK3/KIR2DL4/LAG3/LAMP1/LEP/LGALS9/LTA/MALT1/MAP3K7/MAVS/MICA/MLH1/MR1/NCR1/NCR3/NDFIP1/NLRP3/NOS2/NPPA/P2RX7/PARP3/PLA2G3/PPP3CB/PRKCZ/PTAFR/PVR/SERPINB9…	91
GO:0021895	BP	GO:0021895	cerebral cortex neuron differentiation	17/5894	25/18866	0.000170815	0.00198335	0.00130246	ASCL1/C21orf91/CHD5/CNTN2/DRD1/DRD2/EMX1/FEZF2/GDPD5/LHX6/NKX2-1/NR2E1/OPHN1/PAFAH1B1/PSEN1/RAC3/ZNF335	17
GO:0051051	BP	GO:0051051	negative regulation of transport	188/5894	483/18866	0.000172758	0.00200232	0.00131492	ABCA2/ABCA7/ACTN2/ADCYAP1/ADIPOQ/ADORA1/ADRA2A/ADRA2B/ADRA2C/ADTRP/AGTR2/AKT2/ANGPT1/ANKRD27/APOA2/APOC3/APPL2/ASIC1/ATF4/ATG5/ATXN2/AVPR2/BAG3/BAG4/BARD1/BCL2/BCR/BIN1/BMP8A/BTN2A2/CABP1/CACNB3/CARTPT/CAV1/CAV3/CCR2/CD200/CD33/CD36/CD47/CD74/CLIC2/COMT/CRH/CRHBP/CRHR1/CRYAA/CYP4F2/DERL2/DLG4/DMTN/DRD2/DRD3/DRD4/DYSF/EDN1/EGF/EPO/ERP29/FABP5/FCGR2B/FGF12/FKBP1B/FOXP3/FZD9/GHSR/GJA1/GNAI2/GSK3A/GS…	188
GO:0006704	BP	GO:0006704	glucocorticoid biosynthetic process	14/5894	19/18866	0.00017512	0.00201993	0.00132648	ATP1A1/BMP2/BMP5/CRH/CYP11B1/CYP11B2/CYP17A1/DGKQ/H6PD/HSD11B2/HSD3B1/HSD3B2/REST/WNT4	14
GO:0032674	BP	GO:0032674	regulation of interleukin-5 production	14/5894	19/18866	0.00017512	0.00201993	0.00132648	CRLF2/EPX/FOXP3/GATA3/IFNA2/IL1RL1/IL5RA/IL9/NLRP3/PDE4D/PRKCZ/RARA/SCGB1A1/TNFRSF21	14
GO:0097529	BP	GO:0097529	myeloid leukocyte migration	95/5894	222/18866	0.000175212	0.00201993	0.00132648	AGER/AIF1/AKIRIN1/ARHGEF5/BST1/C1QBP/C5/C5AR2/CALCA/CCL1/CCL11/CCL13/CCL16/CCL2/CCL21/CCL23/CCL24/CCL25/CCL5/CCR2/CD177/CD200/CD47/CD74/CD9/CREB3/CSF1/CSF1R/CSF3R/CX3CL1/CXADR/CXCL2/CXCL3/CXCR1/CYP19A1/DAPK2/DNM1L/DPEP1/DYSF/EDN1/EMILIN1/EPX/FLT1/FUT7/GBF1/IL17A/IL17RA/IL1B/IL1R1/IL23A/IL4/IL6/IL6R/ITGA1/LBP/LGMN/MAPK1/MIF/MMP28/MPP1/MST1/MSTN/MTUS1/NCKAP1L/PDE4B/PDE4D/PDGFB/PDGFD/PECAM1/PF4/PF4V…	95
GO:0060395	BP	GO:0060395	SMAD protein signal transduction	40/5894	78/18866	0.000176168	0.00202734	0.00133135	AFP/BMP10/BMP2/BMP3/BMP4/BMP5/BMP6/BMP8A/BMP8B/BMPR1A/CITED1/FAM89B/GDF11/GDF15/GDF2/GDF3/GDF5/GDF9/INHA/INHBC/INHBE/KIAA0319/LEFTY1/LNPEP/MAGI2/MSTN/OVOL2/ROR2/SH2B1/SKI/SLC2A10/SMAD2/SMAD3/SMAD4/SMAD5/SMAD6/SPTBN1/SUB1/TGFB2/VIM	40
GO:0048806	BP	GO:0048806	genitalia development	27/5894	47/18866	0.000177416	0.00203808	0.0013384	ASB1/BMP5/BMP6/CHD7/CTNNB1/CYP19A1/ESR1/FGF8/FOXF2/GREB1L/HSD17B3/LHCGR/LHX1/LRP2/LRP6/NEUROG1/NIPBL/PTPN11/RBP4/ROR2/SHH/SRD5A2/SYCP2/TBX3/TCF7/WNT5A/WT1	27
GO:0009713	BP	GO:0009713	catechol-containing compound biosynthetic process	15/5894	21/18866	0.000179241	0.00204885	0.00134547	AGTR2/DAO/DBH/DDC/GATA3/GCH1/HAND2/HDC/INSM1/PNMT/SLC6A3/SNCA/TGFB2/TH/VPS35	15
GO:0042423	BP	GO:0042423	catecholamine biosynthetic process	15/5894	21/18866	0.000179241	0.00204885	0.00134547	AGTR2/DAO/DBH/DDC/GATA3/GCH1/HAND2/HDC/INSM1/PNMT/SLC6A3/SNCA/TGFB2/TH/VPS35	15
GO:0006942	BP	GO:0006942	regulation of striated muscle contraction	48/5894	98/18866	0.000179428	0.00204885	0.00134547	ADORA1/ADRA1A/ADRA1B/ATP1A1/ATP2A1/ATP2A2/BIN1/BMP10/CACNA1C/CASQ1/CAV1/CAV3/CLIC2/CTNNA3/DLG1/DSP/FGF13/FKBP1B/FLNA/GATA4/GJA5/GSTM2/HCN4/HDAC4/JUP/KCNJ2/MYBPC3/MYBPH/MYH7/MYL2/MYL3/NKX2-5/NOS1/NPPA/PDE4B/PDE4D/PIK3CG/PKP2/PRKACA/RANGRF/SCN10A/SCN4A/SCN5A/SLC8A1/TNNI1/TNNI3/TNNT3/TRPM4	48
GO:0120254	BP	GO:0120254	olefinic compound metabolic process	57/5894	121/18866	0.000180093	0.00204885	0.00134547	ABCD1/ACOT8/ACSL1/ADM/AFP/AKR1C4/ALDH1A2/ALDH8A1/ALOX12B/ALOX15/ALOX5/ALOXE3/BMP2/BMP5/BMP6/CBR1/CYP11B1/CYP11B2/CYP17A1/CYP19A1/CYP1A2/CYP1B1/CYP2A13/CYP2A6/CYP2A7/CYP2B6/CYP2F1/CYP2U1/CYP46A1/CYP4A11/CYP4F2/CYP4F3/DGKQ/DKKL1/ELOVL2/EPHX1/FAAH/FSHB/GPX1/GRIN1/GSTA1/GSTM1/GSTM2/GSTP1/H6PD/HSD17B3/PLA2G4A/PLA2G4C/PTGES2/PTGS2/REST/RPE65/SRD5A2/STAR/STAT5B/TBXAS1/WNT4	57
GO:0006584	BP	GO:0006584	catecholamine metabolic process	30/5894	54/18866	0.000180251	0.00204885	0.00134547	AGTR2/AOC2/CHRNB2/COMT/DAO/DBH/DDC/DRD1/DRD2/DRD3/DRD4/EPAS1/GATA3/GCH1/GRIN2A/HAND2/HDC/HTR1A/INSM1/PDE1B/PNMT/SLC6A3/SNCA/SNCB/SULT1A1/SULT1A2/TACR3/TGFB2/TH/VPS35	30
GO:0009712	BP	GO:0009712	catechol-containing compound metabolic process	30/5894	54/18866	0.000180251	0.00204885	0.00134547	AGTR2/AOC2/CHRNB2/COMT/DAO/DBH/DDC/DRD1/DRD2/DRD3/DRD4/EPAS1/GATA3/GCH1/GRIN2A/HAND2/HDC/HTR1A/INSM1/PDE1B/PNMT/SLC6A3/SNCA/SNCB/SULT1A1/SULT1A2/TACR3/TGFB2/TH/VPS35	30
GO:0050870	BP	GO:0050870	positive regulation of T cell activation	92/5894	214/18866	0.000180789	0.00205105	0.00134692	AGER/AIF1/AP3D1/BAD/BTN2A2/CAV1/CCL2/CCL21/CCL5/CCR2/CD160/CD1D/CD209/CD28/CD3E/CD40LG/CD46/CD47/CD6/CD70/CD74/CDC42/CYLD/EBI3/EFNB2/EFNB3/EPO/FLOT2/FOXP3/FYN/GATA3/GRAP2/GRB2/HES1/HHLA2/HLA-DMB/HLA-DPA1/HLA-DPB1/HLA-E/IFNG/IGFBP2/IL12B/IL12RB1/IL15/IL1B/IL21/IL23A/IL4/IL4R/IL6/IL7R/ITPKB/JAK3/LEP/LGALS9/MALT1/MAP3K8/MYB/NCK1/NCKAP1L/NLRP3/PAK3/PCK1/PDCD1/PDCD1LG2/PNP/PRKCQ/PRKCZ/PTPN11/PTPN22/PY…	92
GO:0048754	BP	GO:0048754	branching morphogenesis of an epithelial tube	70/5894	155/18866	0.000181078	0.00205105	0.00134692	ABL1/AGT/AGTR2/BCL2/BMP2/BMP4/CASR/CAV3/CCL11/CELSR1/CITED1/CSF1/CTNNB1/DAG1/DCHS1/DLG1/DLG5/EDN1/EGF/ENG/ESR1/EYA1/FGF1/FGF8/FGFR2/FOXA1/FOXC2/GBX2/GDF2/GDNF/GNA13/GPC3/GREB1L/HOXA5/KDM5B/KDR/KRAS/LAMA1/LHX1/LRP6/NKX2-1/NOTCH1/NOTCH4/PAX2/PAX8/PGR/PKD2/PTCH1/RASIP1/SALL1/SHH/SIRT6/SIX2/SMAD4/SMO/SOX9/SPRY2/SRC/SRF/STK4/TBX3/TNF/VDR/WNT1/WNT2B/WNT4/WNT5A/WNT6/WT1/YAP1	70
GO:0001503	BP	GO:0001503	ossification	163/5894	412/18866	0.000181994	0.00205332	0.00134841	ACHE/ACVR2B/ADRB2/ALOX15/ALOX5/ALPL/AMELX/ANKH/ASF1A/ASGR2/ATF4/ATP6AP1/ATP6V1B1/BCL2/BMP2/BMP2K/BMP3/BMP4/BMP5/BMP6/BMP8A/BMP8B/BMPR1A/BMPR1B/BMPR2/CALCA/CASR/CCDC47/CEBPA/CEBPD/CER1/CHRD/CITED1/CLIC1/COMP/CREB3L1/CSF1/CTNNB1/DCHS1/DKK1/DMP1/EIF2AK3/ERCC2/ESRRA/FASN/FBL/FBXL15/FGF18/FGF9/FGFR2/FGFR3/FGR/FOXC1/FOXC2/FZD9/GATA1/GDF2/GDF5/GDPD2/GFRA4/GNAS/GPC3/GPLD1/HAND2/HDAC4/HDAC7/HGF/HIRA/IBSP/…	163
GO:0051954	BP	GO:0051954	positive regulation of amine transport	23/5894	38/18866	0.000182228	0.00205332	0.00134841	AGT/AVP/AVPR1A/CARTPT/CCK/CHRNB2/DRD2/DRD4/GDNF/NPY2R/NTSR1/OXT/OXTR/P2RX7/PSEN1/RAB3B/RAB3GAP1/SLC12A2/SLC38A3/STXBP1/SYT1/TRH/VIP	23
GO:2000144	BP	GO:2000144	positive regulation of DNA-templated transcription	initiation	23/5894	38/18866	0.000182228	0.00205332	0.00134841	BCLAF1/CREB1/CTNNB1/ERCC1/ERCC6/ESR1/FOSL1/HNF1A/MED12/MED13/MED14/MED24/MED4/NKX2-5/PSMC3/PSMC4/PSMC5/PSMC6/SETX/SRF/SUB1/TP53/WNT10B	23
GO:0021915	BP	GO:0021915	neural tube development	73/5894	163/18866	0.000183295	0.00206175	0.00135394	ABL1/ADM/ALDH1A2/ALX1/AMBRA1/APAF1/ARHGAP35/ARID1A/ATP6AP2/BBS4/BMP4/BMP5/BRD2/CASP3/CELSR1/CHRD/DCHS1/FGF8/FOXA1/FOXB1/FUZ/FZD3/GBX2/GLMN/GPR161/GRHL2/HES1/IFT122/IFT140/IFT57/ITPK1/LRP2/LRP6/LUZP1/MED12/MTHFR/NF1/NOTCH1/OVOL2/PAX2/PAX6/PAX7/PFN1/PKD2/PLXNB2/PRKACA/PROX1/PSEN1/PTCH1/RARA/SALL2/SCRIB/SDC4/SHH/SKI/SMO/SPINT2/SSBP3/STK4/TCF7/TCTN1/TGFB2/TMED2/TRAF3IP1/TRAF6/TSC1/TSC2/VASP/WDR19/WNT…	73
GO:0006888	BP	GO:0006888	endoplasmic reticulum to Golgi vesicle-mediated transport	89/5894	206/18866	0.000185853	0.0020869	0.00137046	ACTR10/ANK1/ANKRD28/ARCN1/ARFGAP2/BET1L/CAPZA1/CAPZA2/CNIH3/COG4/COG5/COG7/COPB1/COPE/COPZ1/CSNK1D/CTAGE1/DCTN1/DCTN4/DCTN5/DCTN6/DYNC1LI1/DYNC1LI2/ERGIC2/ERGIC3/F2/F5/F7/F8/F9/GAS6/GBF1/GOLGB1/GOSR1/GOSR2/GRIA1/HYOU1/IER3IP1/INS/INSIG1/KDELR1/KLHL12/LMAN1/LMAN1L/MIA2/MIA3/MPPE1/PDCD6/PPP6C/PROC/PROZ/RAB1A/RAB1B/RANGRF/RINT1/SAR1A/SCFD1/SEC13/SEC16A/SEC23B/SEC23IP/SEC24D/SEC31B/SORL1/SPTA1/SPTB/S…	89
GO:0006757	BP	GO:0006757	ATP generation from ADP	55/5894	116/18866	0.000187908	0.00210632	0.00138322	AAAS/ALDOA/ALDOC/ARNT/BPGM/CBFA2T3/EIF6/ENO3/EP300/ESRRB/GAPDH/GAPDHS/GCK/GPD1/GPI/HDAC4/HKDC1/HTR2A/IFNG/INS/INSR/MLXIPL/MYOG/NUP188/NUP214/NUP54/NUP88/NUP98/NUPR1/OGDH/OGDHL/OGT/P2RX7/PFKFB1/PFKFB3/PFKFB4/PFKL/PFKP/PGAM1/PGK1/PGK2/PKLR/POM121/PPARA/PRKAA1/PRKAG2/PSEN1/RANBP2/SEC13/SEH1L/SIRT6/SLC4A1/STAT3/TPI1/TPR	55
GO:0046546	BP	GO:0046546	development of primary male sexual characteristics	65/5894	142/18866	0.00018859	0.00211031	0.00138584	ADAM15/ADAM20/ADAM21/AMHR2/ARID4B/ATRX/BCL2/BCL2L1/CBL/CCND1/CRKL/CTSV/DMRT1/ERCC1/ESR1/FGF9/FLNA/FNDC3A/FSHB/FSHR/GATA1/GATA3/GATA4/HMGCS1/ING2/INHA/INSR/KDM5A/KITLG/LHCGR/LRP2/LRRC6/MAMLD1/NKX2-1/NR0B1/NR5A1/NTRK1/NUPR1/PLEKHA1/PRKACG/RAB13/RAD21L1/RARA/REN/RHOBTB3/SDC1/SEMA3A/SF1/SGPL1/SMAD4/SOX15/SOX9/SRD5A2/SRY/STAR/TEX11/TFAP2C/TGFB2/TMF1/WNT2B/WNT4/WNT5A/WT1/YBX3/ZFPM2	65
GO:0048705	BP	GO:0048705	skeletal system morphogenesis	97/5894	228/18866	0.000194609	0.00217392	0.00142761	ACAN/ACVR2B/ALPL/ALX1/ALX3/ALX4/ANKRD11/ANXA6/BMP4/BMP6/BMPR1B/BMPR2/CDX1/CER1/CHAD/COMP/CTNNB1/CYP26B1/DLG1/EYA1/FGF18/FGF4/FGF6/FGF8/FGFR1/FGFR2/FGFR3/FGR/FOXC1/FOXC2/FUZ/GNAS/GRHL2/HOXA1/HOXA5/HOXA6/HOXB1/HOXB2/HOXB3/HOXB5/HOXB6/HOXB8/HOXB9/HOXC4/HOXC8/HYAL1/HYAL2/IFT140/INSIG1/LHX1/LRP6/LTBP3/LTF/MATN1/MDFI/MED12/MEF2D/MEGF8/MGP/MMP16/MSX1/MYF5/NAB1/NAB2/NEUROG1/NIPBL/NKX3-2/NPPC/OSR2/P2RX7/P…	97
GO:0060402	BP	GO:0060402	calcium ion transport into cytosol	71/5894	158/18866	0.000196807	0.00219469	0.00144125	ABL1/ADCYAP1R1/ADRA1A/APLNR/ATG5/ATP2B4/BCL2/BDKRB1/CACNA1C/CACNA2D1/CACNB3/CALCR/CAPN3/CASQ1/CAV1/CCL21/CHD7/CLIC2/CX3CL1/DRD1/DRD2/EPO/F2/F2RL3/FAM155A/FAM155B/FASLG/FKBP1B/FYN/GRIN1/GRIN2A/GRIN2B/GRIN2C/GRIN2D/GSTM2/HAP1/HTR2A/HTR2B/HTR2C/IL13/JPH3/LETM1/LIME1/MCOLN1/MCOLN3/NOS1/NTSR1/P2RX3/P2RX7/PDE4D/PKD2/PRKACA/PRKCE/PTK2B/RAMP3/RASA3/RYR3/SLC24A1/SLC24A2/SLC8A1/SLC8B1/SNCA/TRDN/TRPA1/TRPC1…	71
GO:1902903	BP	GO:1902903	regulation of supramolecular fiber organization	149/5894	373/18866	0.000200834	0.00223528	0.0014679	ABL1/ACTN2/ACTR2/ACTR3/ADD2/ADD3/ALOX15/ANKRD53/AP1AR/APC/APC2/ARFIP2/ARHGAP28/ARHGAP35/ARHGEF10/ARHGEF15/ARHGEF18/ARHGEF2/ARHGEF5/ARL2/ARPC1A/ARPC4/ARPC5L/ARPIN/BAG4/BAIAP2L2/BBS4/BIN1/BMP10/CAPG/CAPZA1/CAPZA2/CAV3/CCL11/CCL21/CCL24/CD47/CDC42/CDC42EP1/CDC42EP2/CDH5/CDK5R1/CDK5RAP2/CDKN1B/CIB1/CLASP1/CORO1B/CSF3/CTNNA2/CX3CL1/DBN1/DCTN1/DLG1/DMTN/EDN1/ELN/EMILIN1/EPS8/F2RL1/FES/FGF13/FHOD3/FKBP4…	149
GO:0042692	BP	GO:0042692	muscle cell differentiation	155/5894	390/18866	0.000201137	0.00223528	0.0014679	ABL1/ACTA1/ACTN2/ADM/ADRA1A/AFG3L2/AGT/AGTR2/ALPK3/ANKRD1/ANKRD17/ANKRD2/ARID1A/ASF1A/ATG5/ATP2A2/AVPR1A/BCL2/BCL9/BDNF/BIN1/BIN3/BMP10/BMP2/BMP4/BNIP2/CAPN3/CASP3/CASQ1/CAV3/CBY1/CD9/CDC42/CDH15/CDH2/CDK9/CDON/CHRNB1/CHUK/COMP/CSRP3/CTDP1/CTH/CTNNA2/CTNNB1/CXADR/CYP26B1/DKK1/DYRK1B/DYSF/EDN1/EFNB2/EHD1/EHD2/ENG/FBXO22/FBXO40/FGF9/FGFR2/FHOD3/FLT3LG/FOXO4/FRS2/FZD7/GATA4/GDF15/GLMN/GPX1/GSK3A/HDA…	155
GO:0051289	BP	GO:0051289	protein homotetramerization	32/5894	59/18866	0.000203017	0.00224089	0.00147159	ALDH1A2/ALDOA/APPL2/AQP2/AQP4/CBY1/CRTC1/CRTC3/CRYZ/CTH/GNMT/HSD17B10/KCNJ2/KIF25/MAT1A/MCOLN1/MIP/PFKL/PFKP/PKD2/PKD2L1/RYR3/SAMHD1/SHMT1/SYCP1/THG1L/TRPA1/TRPM2/TRPM4/TRPV5/UPB1/VASP	32
GO:0031943	BP	GO:0031943	regulation of glucocorticoid metabolic process	9/5894	10/18866	0.000203026	0.00224089	0.00147159	ATP1A1/BMP2/BMP5/DGKQ/GAL/H6PD/REST/STUB1/WNT4	9
GO:0051967	BP	GO:0051967	negative regulation of synaptic transmission	glutamatergic	9/5894	10/18866	0.000203026	0.00224089	0.00147159	ADORA1/DRD2/DRD3/GRIK2/GRIK3/HTR1B/HTR2A/NPY2R/PLA2G6	9
GO:0071104	BP	GO:0071104	response to interleukin-9	9/5894	10/18866	0.000203026	0.00224089	0.00147159	CITED1/IL2RG/IL9/IL9R/JAK1/JAK3/STAT3/STAT5A/STAT5B	9
GO:0003197	BP	GO:0003197	endocardial cushion development	26/5894	45/18866	0.000205067	0.00225574	0.00148134	BMP2/BMP4/BMP5/BMPR1A/BMPR2/DCHS1/ENG/FGF8/GATA4/HEY2/HEYL/ISL1/JAG1/MDM2/MDM4/MSX1/NEDD4/NOS3/NOTCH1/RBPJ/ROBO1/SMAD4/SNAI1/SOX9/TBX2/TGFB2	26
GO:0031018	BP	GO:0031018	endocrine pancreas development	26/5894	45/18866	0.000205067	0.00225574	0.00148134	ARNTL/BAD/BMP4/BMP5/BMP6/EIF2AK3/FOXO1/GIP/GIPR/GSK3A/HES1/IL6/IL6R/INSM1/MNX1/NEUROG3/NKX2-2/ONECUT1/PAX4/PAX6/PDX1/RFX3/SIDT2/SMO/SOX9/WNT5A	26
GO:0006869	BP	GO:0006869	lipid transport	156/5894	393/18866	0.00020585	0.00226052	0.00148447	ABCA2/ABCA3/ABCA4/ABCA7/ABCB11/ABCB4/ABCC2/ABCC3/ABCD1/ABCD2/ABCD4/ACE/ACSL1/ADIPOQ/AGT/AGTR2/AKR1C4/AKT2/ANO3/APOA2/APOA4/APOC3/APOF/APOH/APOL3/APOL6/ATP10A/ATP10D/ATP11A/ATP11B/ATP8A2/ATP8B1/ATP8B2/ATP8B3/ATP8B4/ATP9A/AVPR1B/BMP6/C1QTNF1/CASR/CAV1/CD36/CEL/CETP/CFHR4/CHKA/CLN3/CPT1A/CRH/CRHR1/CYP19A1/CYP4A11/CYP4F2/DRD2/DRD3/DRD4/EDN1/EGF/FABP1/FABP2/FABP3/FABP4/FABP5/FABP6/GAL/GALR1/GDF9/GM2A/…	156
GO:0033077	BP	GO:0033077	T cell differentiation in thymus	39/5894	76/18866	0.000207479	0.0022707	0.00149116	AIRE/ATG5/BCL2/BMP4/CAMK4/CCR6/CD28/CD3D/CD3E/CD3G/CD74/CLPTM1/CTNNB1/DOCK2/FOXJ1/FOXP3/FZD5/FZD7/GATA3/IL1B/IL7R/ITPKB/JMJD6/LIG4/MR1/NCAPH2/RAG2/SHH/SOD1/SOS1/SRF/STAT5B/STK11/TESPA1/TP53/VNN1/WNT1/WNT4/ZFP36L1	39
GO:1901616	BP	GO:1901616	organic hydroxy compound catabolic process	39/5894	76/18866	0.000207479	0.0022707	0.00149116	AKR1B10/AKR1D1/ALDH1B1/BPNT1/CEL/COMT/CYP27A1/CYP39A1/CYP46A1/CYP4A11/CYP4F2/CYP4F3/CYP7A1/DBH/DIO3/FAH/GK/GK2/GPD2/HAO1/IMPA1/INPP5B/INPP5J/INPP5K/MT3/MTMR7/NTSR1/OCRL/PTEN/SCARF1/SLC6A3/SNX17/SORD/SRD5A3/SULT1A1/SULT1A2/SYNJ1/SYNJ2/TPI1	39
GO:0030278	BP	GO:0030278	regulation of ossification	91/5894	212/18866	0.000208376	0.00227667	0.00149508	ACVR2B/ADRB2/ALOX5/ANKH/ATF4/ATP6AP1/BCL2/BMP2/BMP2K/BMP4/BMP6/BMPR1A/BMPR1B/BMPR2/CALCA/CEBPA/CEBPD/CHRD/CITED1/CLIC1/COMP/CSF1/CTNNB1/DKK1/ESRRA/FGFR2/FZD9/GATA1/GDPD2/GFRA4/GNAS/HAND2/HDAC4/HDAC7/HGF/ID1/ID2/IGFBP5/IL6/IL6R/JAG1/LIMD1/LRP4/LRP6/LTBP3/LTF/MAPK1/MATN1/MGP/NELL1/NIPBL/NOTCH1/NPPC/OSR2/OXT/P2RX7/PDLIM7/PRKACA/PRKD1/PTCH1/PTGER4/PTH/PTK2B/PTPN11/RBPJ/REST/RORB/RUNX2/SIX2/SKI/SLC8A1…	91
GO:0003179	BP	GO:0003179	heart valve morphogenesis	29/5894	52/18866	0.000210222	0.00228529	0.00150074	ADAMTS9/BMP2/BMP4/BMPR1A/BMPR2/DCHS1/ELN/EMILIN1/GATA3/GATA4/GJA5/HEY2/HEYL/JAG1/MDM2/MDM4/MTOR/NFATC1/NOS3/NOTCH1/OLFM1/RB1/ROBO1/ROCK2/SMAD4/SMAD6/SNAI1/SOX9/TGFB2	29
GO:0051339	BP	GO:0051339	regulation of lyase activity	29/5894	52/18866	0.000210222	0.00228529	0.00150074	AKAP5/CACNA1C/CACNA1D/CAP1/CCR2/CRHR1/DRD2/DRD3/DRD5/GABBR2/GALR1/GALR2/GNAI2/GPR87/GRM2/GRM3/GUCA1B/GUCA2B/HPCA/ISCU/LTB4R2/MTRR/NF1/NOS1/NOS2/NOS3/NPR3/PDZD3/RCVRN	29
GO:0072132	BP	GO:0072132	mesenchyme morphogenesis	29/5894	52/18866	0.000210222	0.00228529	0.00150074	ACTA1/BMP2/BMP5/BMPR1A/DCHS1/ENG/FGF8/FGFR1/FOXC1/FOXC2/HEY2/HEYL/ISL1/MDM2/MDM4/MSX1/NOS3/NOTCH1/RBPJ/ROBO1/SMAD2/SMAD3/SMAD4/SNAI1/SOX9/TBX2/TGFB2/WNT11/WNT5A	29
GO:0046660	BP	GO:0046660	female sex differentiation	56/5894	119/18866	0.000211238	0.00229248	0.00150547	ACVR1B/ADCYAP1/ADCYAP1R1/AFP/AMHR2/ATM/BCL2/BCL2L1/BMPR1B/CASP3/CHD7/CYP19A1/DACH1/DMC1/EIF2B2/ESR1/FOXC1/FSHB/FSHR/GDF9/GNRH1/HYAL3/IDH1/INHA/INSR/KITLG/KMT2B/LEP/LFNG/LHCGR/LHX1/LRP2/MSH4/NOS3/NR5A1/NRIP1/NUPR1/PCYT1B/PGR/PLEKHA1/PTX3/RBP4/RETN/SGPL1/SMAD4/SOD1/SPO11/SRC/STAT5B/TBX3/UBE3A/VGF/WNT4/WNT5A/WT1/ZFPM2	56
GO:0019751	BP	GO:0019751	polyol metabolic process	61/5894	132/18866	0.000212226	0.00229935	0.00150998	ABCA2/ADCYAP1R1/ANGPTL3/AVPR1B/BPNT1/COQ2/COQ3/CYP27A1/CYP2R1/DYSF/GALR2/GCH1/GK/GK2/GPD2/IMPA1/INPP4B/INPP5B/INPP5J/INPP5K/IP6K2/IPPK/ITPK1/ITPKA/ITPKB/LEP/LHCGR/MECP2/MOGAT2/MTMR7/MYOF/NTSR1/NUDT4/OCRL/P2RY1/PCK1/PGP/PLA2G4A/PLCB1/PLCB2/PLCB3/PLCE1/PLCH1/PLCH2/POU1F1/PPIP5K1/PPIP5K2/PTAFR/PTEN/PTH/PTK2B/PTS/QDPR/SLC34A1/SNCA/SORD/SPHK2/SPTLC3/SYNJ1/SYNJ2/TPI1	61
GO:0042509	BP	GO:0042509	regulation of tyrosine phosphorylation of STAT protein	43/5894	86/18866	0.000214124	0.00231604	0.00152093	CAV1/CCL5/CNOT7/CNTF/CRLF1/CSF1R/CSF2/CSH1/CTF1/EPO/ERBB4/FGFR3/FLT3/FYN/GH1/GH2/GHR/HCLS1/HDAC2/HES1/HPX/IFNA2/IFNG/IL12B/IL13/IL15/IL21/IL23A/IL3/IL4/IL6/IL6R/ISL1/LEP/LIF/OSM/PECAM1/PIBF1/PPP2R1A/STAT3/TNF/TNFRSF1A/TNFSF18	43
GO:0048872	BP	GO:0048872	homeostasis of number of cells	107/5894	256/18866	0.000215062	0.00232021	0.00152367	ABL1/ACVR1B/AHSP/ALAS2/AMPD3/ARNT/BAP1/BCL2/BCR/BMP4/BPGM/BRD1/CACNA1F/CASP3/CCR2/CCR4/CD74/CDH2/CEBPG/CSF1/CYLD/DMTN/DOCK10/EMX1/EPAS1/EPB42/EPO/ERCC2/ETS1/FANCC/FH/FLT3/FLT3LG/FOXP3/GATA1/GATA3/GCNT4/GPR183/HCLS1/HOXA5/HOXB6/ID2/IL6/IL7R/INHA/IREB2/ITPKB/JAK3/JMJD6/KAT7/KITLG/KLF1/KRAS/LAT/LGALS9/LMO1/LPCAT3/LRRC19/MB/MIF/NCKAP1L/NOS3/NOTCH1/P2RX7/PDE4B/PIK3CB/PKN1/PKNOX1/PLA2G2A/POLB/PPP3CB/PR…	107
GO:0032496	BP	GO:0032496	response to lipopolysaccharide	135/5894	334/18866	0.000215225	0.00232021	0.00152367	ABCC2/ABL1/ADAM9/ADAMTS13/ADH5/ADM/ALPL/ANKRD1/ASS1/ATP2A2/BCR/BDKRB1/BMP6/CARD8/CASP1/CASP3/CASP8/CCL2/CCL5/CD36/CD6/CD96/CDC73/CEBPE/CHUK/CITED1/CNP/CNR2/COMT/CPS1/CSF2/CSF2RB/CSF3/CTR9/CX3CL1/CXCL2/CXCL3/CYP1A2/DCN/DEFA4/DEFA5/DEFA6/EDN1/EPO/FASLG/FGFR2/FMO1/GCH1/GFI1/GGT5/GHSR/GJA1/GNRH1/GSTP1/HDAC2/HNRNPA0/IFNAR1/IL12B/IL12RB2/IL13/IL1B/IL37/IL6/IRAK3/LBP/LGALS9/LTA/LTF/LY86/MALT1/MAPK1/MIF/…	135
GO:0003279	BP	GO:0003279	cardiac septum development	54/5894	114/18866	0.000220582	0.002374	0.001559	ADAMTS6/BMP4/BMP5/BMPR1A/BMPR2/CHD7/DCTN5/DNM2/EGLN1/ENG/FGF8/FGFR2/FRS2/GATA3/GATA4/GJA5/HAND1/HEG1/HES1/HEY2/HEYL/ID2/ISL1/JAG1/LRP2/LTBP1/LUZP1/MAML1/MDM2/MDM4/NKX2-5/NOS3/NOTCH1/PAX8/PROX1/RARA/RBPJ/ROBO1/SALL1/SMAD4/SMAD6/SMO/SNX17/TAB1/TBX1/TBX2/TBX3/TGFB2/TP53/TRIP11/WNT11/WNT5A/ZBTB14/ZFPM2	54
GO:0051056	BP	GO:0051056	regulation of small GTPase mediated signal transduction	131/5894	323/18866	0.00022295	0.00239552	0.00157313	A2M/ABL1/ADCYAP1R1/ADRA1A/AMOT/APOC3/ARFGEF2/ARHGAP12/ARHGAP22/ARHGAP24/ARHGAP26/ARHGAP28/ARHGAP29/ARHGAP33/ARHGAP35/ARHGAP4/ARHGDIA/ARHGDIB/ARHGDIG/ARHGEF10/ARHGEF11/ARHGEF12/ARHGEF17/ARHGEF18/ARHGEF2/ARHGEF28/ARHGEF4/ARHGEF5/ARHGEF7/BCR/CADM4/CBL/CDC42/CDC42SE1/CDON/CRK/CRKL/CSF1/CYTH2/CYTH3/CYTH4/DENND4A/DNM2/EPO/EPOR/EPS8/F2RL1/F2RL2/F2RL3/FAM13A/FGD1/FGD2/GBF1/GDI2/GMIP/GNA13/GPR17/GPR20/GPR…	131
GO:0032970	BP	GO:0032970	regulation of actin filament-based process	160/5894	405/18866	0.000224958	0.00241309	0.00158467	ABL1/ACTN2/ACTR2/ACTR3/ADD2/ADD3/ADORA1/ALOX15/AP1AR/ARFIP2/ARHGAP28/ARHGAP35/ARHGDIA/ARHGDIB/ARHGEF10/ARHGEF15/ARHGEF18/ARHGEF5/ARPC1A/ARPC4/ARPC5L/ARPIN/ATP1A1/ATP2A1/ATP2A2/BAG4/BAIAP2L2/BBS4/BCAS3/BIN1/BMP10/BST1/CACNA1C/CAPG/CAPZA1/CAPZA2/CAV1/CAV3/CCL11/CCL21/CCL24/CCL27/CD47/CDC42/CDC42EP1/CDC42EP2/CDK5R1/CELSR1/CLASP1/CNN2/CORO1B/CRK/CSF1R/CSF3/CTNNA2/CTNNA3/CX3CL1/DBN1/DLG1/DMTN/DSP/EDN1…	160
GO:0006939	BP	GO:0006939	smooth muscle contraction	52/5894	109/18866	0.000229278	0.00245536	0.00161243	ADORA1/ADRA1A/ADRA2A/ADRA2B/ADRA2C/ADRB2/AGT/ATP2B4/CALCA/CALCRL/CAV1/CHRM2/CHRM3/CHRNA3/CHRNB2/CHRNB4/COMP/DLG1/DOCK5/DRD1/DRD2/EDN1/FKBP1B/GDNF/GHSR/GRIP2/HTR1D/HTR2A/HTR2B/HTR7/ITGA2/KCNB2/NEUROG1/NPY2R/OXT/OXTR/P2RX3/PDE4D/PLA2G6/PLCE1/PRKG1/PTAFR/PTGER3/PTGS2/ROCK2/SETD3/SLC8A1/SOD1/SRF/SSTR2/TACR3/TNNI3	52
GO:0018394	BP	GO:0018394	peptidyl-lysine acetylation	76/5894	172/18866	0.000229831	0.00245722	0.00161365	ACTL6B/APBB1/ATAT1/ATF2/ATG5/BAG6/BRD1/BRD7/BRD8/BRPF1/CDY1/CHD5/CREBBP/CTBP1/DPF3/DR1/EID1/EP300/EP400/FOXP3/GATA3/GLYR1/HDAC2/IL1B/ING3/ING4/IRF4/ISL1/JADE3/KANSL3/KAT5/KAT6A/KAT7/KAT8/KLF15/KMT2A/LIF/MAP3K7/MBD3/MCM3AP/MCRS1/MEAF6/MECP2/MORF4L1/MSL1/MSL3/MYOD1/NAA60/NAP1L2/NAT8B/NCOA3/NOS1/OGT/PHF10/PHF20/PIH1D1/POLE3/PRKAA1/RPS6KA4/RPS6KA5/SETD5/SMAD4/SMARCB1/SNCA/SPHK2/SRCAP/TADA3/TAF1/TAF10…	76
GO:0018393	BP	GO:0018393	internal peptidyl-lysine acetylation	73/5894	164/18866	0.000230372	0.00245895	0.00161478	ACTL6B/APBB1/ATAT1/ATF2/ATG5/BAG6/BRD1/BRD7/BRD8/BRPF1/CDY1/CHD5/CREBBP/CTBP1/DPF3/DR1/EID1/EP300/EP400/FOXP3/GATA3/GLYR1/IL1B/ING3/ING4/IRF4/ISL1/JADE3/KANSL3/KAT5/KAT6A/KAT7/KAT8/KMT2A/LIF/MAP3K7/MBD3/MCM3AP/MCRS1/MEAF6/MECP2/MORF4L1/MSL1/MSL3/MYOD1/NAA60/NAP1L2/NAT8B/NCOA3/NOS1/OGT/PHF10/PHF20/PIH1D1/POLE3/RPS6KA4/RPS6KA5/SETD5/SMAD4/SMARCB1/SNCA/SPHK2/SRCAP/TADA3/TAF1/TAF10/TAF12/TAF6L/TAF7/T…	73
GO:0019228	BP	GO:0019228	neuronal action potential	21/5894	34/18866	0.000232446	0.00246888	0.00162131	CACNA1G/CACNA1I/CHRNA1/DRD1/FGF12/GPR88/GRIK2/KCNA1/KCNA2/KCNMB2/KCNMB4/MTNR1B/P2RX3/SCN10A/SCN11A/SCN1A/SCN2A/SCN3A/SCN4A/SCN5A/SCN8A	21
GO:0035774	BP	GO:0035774	positive regulation of insulin secretion involved in cellular response to glucose stimulus	21/5894	34/18866	0.000232446	0.00246888	0.00162131	ADCY8/BAD/BAIAP3/CRH/GCG/GPLD1/GPR27/GPR68/KIF5B/LRP1/MPC2/NADK/NR1H4/PDX1/PLA2G6/PPP3CB/RAC1/STX4/SYBU/TRPM4/VSNL1	21
GO:0048854	BP	GO:0048854	brain morphogenesis	21/5894	34/18866	0.000232446	0.00246888	0.00162131	BBS4/CDH2/CTNNA2/EMX1/FANCC/FGF8/FZD3/HESX1/NF1/PAFAH1B1/PAX2/PROP1/PSEN1/PTEN/SHANK1/SLC4A10/SLIT1/SMO/SOS1/WNT5A/ZNF335	21
GO:0061448	BP	GO:0061448	connective tissue development	109/5894	262/18866	0.000233818	0.00247939	0.0016282	AACS/ACAN/ADAMTS7/AMELX/ANXA6/ATF2/BBS4/BMP10/BMP2/BMP3/BMP4/BMP5/BMP6/BMP8A/BMP8B/BMPR1A/BMPR1B/BMPR2/CASR/CD44/CER1/COL11A2/COMP/CRIP1/CSF1/CTNNB1/CYTL1/DYRK1B/EBF2/EDN1/EFEMP1/EIF2AK3/ESRRA/EVC/FGF18/FGF4/FGF6/FGF9/FGFR1/FGFR3/FOXA1/FOXC2/FRZB/GDF2/GDF5/GNAS/GPLD1/HAND1/HAND2/HOXA5/HOXB3/HOXC4/HYAL1/HYAL2/HYAL3/ID2/IL6R/ITGB8/LEP/LRP6/LTBP3/MAF/MATN1/MATN3/MEF2D/MEX3C/MGP/MSX1/MYF5/NKX3-2/NOTC…	109
GO:0048762	BP	GO:0048762	mesenchymal cell differentiation	97/5894	229/18866	0.000235097	0.00248888	0.00163444	ADAM15/ALDH1A2/ALX1/AMELX/ANXA6/BCL2/BMP2/BMP4/BMP5/BMPR1A/CLASP1/CTNNB1/CUL7/DAG1/DDX17/DLG5/EDN1/ELL3/ENG/EPB41L5/ERBB4/FGF8/FGFR1/FGFR2/FOXA1/FOXC1/FOXC2/FOXF2/FRZB/FUZ/GATA3/GBX2/GCNT2/GDNF/HAND2/HDAC2/HES1/HEY2/HEYL/HGF/HNRNPAB/HPN/HTR2B/IL1B/IL6/ISL1/JAG1/KITLG/KLHL12/LDLRAD4/LRP6/MAPK1/MSX1/MTOR/NKX2-1/NOTCH1/NOTCH4/NRTN/OLFM1/OVOL2/PAX2/PDCD6/PHOX2B/POFUT2/PTEN/RBPJ/RET/RGCC/RTN4/SDCBP/SE…	97
GO:0010811	BP	GO:0010811	positive regulation of cell-substrate adhesion	57/5894	122/18866	0.000236123	0.00248905	0.00163455	ABL1/ALOX15/ARHGEF7/ARL2/C1QBP/CASS4/CCL21/CCL25/CD36/CD3E/CDC42/CIB1/COL8A1/CRK/CRKL/CSF1/CSPG5/CX3CL1/DAG1/DISC1/DMP1/DMTN/DNM2/DOCK1/DOCK5/ECM2/EDIL3/EMILIN1/EPB41L5/FBLN2/FGB/FLNA/HRG/HSD17B12/IQGAP1/JUP/KDR/MAP4K4/NINJ1/NPY2R/OLFM4/PLEKHA2/PPM1F/PRKCE/PRKCZ/PTK2B/PTPRJ/RAC1/RAC3/RSU1/SDC4/SKAP1/SMAD3/SPOCK2/STK4/TSC1/WNT4	57
GO:0042752	BP	GO:0042752	regulation of circadian rhythm	57/5894	122/18866	0.000236123	0.00248905	0.00163455	ADCY1/ADORA1/ADRB1/ARNTL/ATG7/CCAR2/CHRNB2/CREB1/CREM/CRH/CRTC1/CSF2/CSNK1D/CSNK1E/DRD2/DRD3/DRD4/FBXL8/GHRH/GHRHR/GNA11/HCRTR2/HDAC3/HNRNPD/ID2/KCNA2/KDM2A/MAGEL2/MAPK10/MAPK9/MTNR1B/MTOR/NKX2-1/NPY2R/OPRL1/PDE6B/PER3/PHLPP1/PPARA/PPARG/PPP1CC/PRKAA1/PRKCG/PROX1/PSPC1/RBM4B/ROCK2/RORB/SIAH2/SOX14/SUV39H2/TARDBP/THRAP3/TP53/UBE3A/USP2/ZFHX3	57
GO:0017158	BP	GO:0017158	regulation of calcium ion-dependent exocytosis	25/5894	43/18866	0.00023665	0.00248905	0.00163455	ADRA2A/ATP2A2/BAIAP3/CACNA1G/CACNA1I/CDK5R2/DOC2A/DOC2B/GNAI2/HYAL3/NOTCH1/RAB3GAP1/REST/RPH3AL/SCAMP5/STXBP1/SYT1/SYT11/SYT12/SYT13/SYT17/SYT2/SYT5/TRIM9/TRPV6	25
GO:0030517	BP	GO:0030517	negative regulation of axon extension	25/5894	43/18866	0.00023665	0.00248905	0.00163455	ARHGAP4/CDK5R1/CDKL3/IFRD1/KIAA0319/MAG/MAP2/MT3/NTN1/PTPRS/RNF6/RTN4/SEMA3A/SEMA3B/SEMA3D/SEMA4A/SEMA4G/SEMA6A/SEMA6B/SEMA6C/SEMA6D/SEMA7A/TNR/TRIM46/WNT5A	25
GO:0045216	BP	GO:0045216	cell-cell junction organization	90/5894	210/18866	0.000240101	0.00252126	0.0016557	ACE/ACTB/ACTN4/AGT/APC/ARL2/ARVCF/BMP6/CAV1/CD177/CD9/CDC42/CDH1/CDH10/CDH12/CDH15/CDH17/CDH18/CDH2/CDH20/CDH4/CDH5/CDH6/CDH7/CDH8/CDH9/CLDN14/CLDN16/CLDN3/CLDN6/CLDN8/CLDN9/CNTNAP1/CSF1R/CTNNB1/CTNND2/CXADR/DCHS1/DLG1/DLG5/DSP/EFNB2/EPHA4/F2RL1/FZD5/GJA1/GJA4/GJA5/GJB1/GRHL2/HDAC7/HEG1/IKBKB/IL1B/JUP/KIFC3/LIM2/MYO1C/NLGN4X/NPHP1/NPHP4/NR1H4/PARD6A/PARD6B/PECAM1/PERP/PKP1/PKP2/PKP4/PRKACA/PRKCA/…	90
GO:0072006	BP	GO:0072006	nephron development	65/5894	143/18866	0.000241303	0.00252978	0.0016613	ADIPOQ/AGT/AGTR2/AHI1/ANGPT1/BCL2/BMP2/BMP4/CITED1/COL4A4/CTNNB1/DCHS1/DLG1/EYA1/FGF1/FGF8/FOXC1/FOXC2/FOXJ1/GATA3/GDNF/GPC3/GREB1L/HES1/HEYL/IL6R/IQGAP1/JAG1/KLF15/KLHL3/LHX1/LIF/MAGI2/MTSS1/MYO1E/NOTCH1/NOTCH3/NPHS1/NPHS2/PAX2/PAX8/PDGFB/PDGFD/PECAM1/PKD2/PLCE1/POU3F3/PTCH1/PTPRO/RET/SALL1/SERPINB7/SHH/SIX2/SMAD4/SMO/SOX9/UMOD/WNT1/WNT11/WNT2B/WNT4/WNT6/WT1/YAP1	65
GO:0007622	BP	GO:0007622	rhythmic behavior	28/5894	50/18866	0.000245028	0.00256468	0.00168422	ADORA1/ADRB1/AHCY/CHRNB2/CRH/CSF2/DRD2/DRD3/GHRH/GHRHR/GPR176/HCRTR2/ID2/KCNA2/MC3R/MTNR1B/MTOR/NAGLU/NPY2R/OPRL1/PER3/PTEN/SIX3/STAR/TH/TP53/USP2/ZFHX3	28
GO:1904062	BP	GO:1904062	regulation of cation transmembrane transport	140/5894	349/18866	0.000247407	0.0025854	0.00169782	ABL1/ACTN2/ACTN4/ADRA2A/ADRB2/AGT/APLNR/ARC/ATG5/ATP2A1/ATP2B4/BDKRB1/BIN1/BPIFA1/CACNA1C/CACNA1D/CACNA2D1/CACNB1/CACNB3/CACNG1/CACNG2/CACNG3/CACNG4/CACNG5/CALCR/CAPN3/CASQ1/CAV1/CAV3/CCL2/CCR2/CD63/CHD7/CLIC2/CNIH3/CRH/CRHBP/CRHR1/CX3CL1/DAPK1/DLG1/DLG4/DNM2/DRD1/DRD2/DRD3/DRD4/DYSF/EPO/F2/F2RL3/FGF12/FGF13/FKBP1B/FLNA/FXYD2/FXYD3/FXYD5/FXYD6/FXYD7/FYN/GAL/GALR2/GRIA1/GRIA2/GRIA3/GRIA4/GRIN1/GRI…	140
GO:0051092	BP	GO:0051092	positive regulation of NF-kappaB transcription factor activity	71/5894	159/18866	0.00024804	0.00258784	0.00169943	AGER/AGT/ARHGEF2/BTK/CAMK2A/CAPN3/CAV1/CD36/CD40LG/CHUK/CIB1/CTH/CX3CL1/EDA/EDA2R/ERC1/FLOT2/IKBKB/IL18R1/IL18RAP/IL1B/INS/IRAK3/KRAS/LAMTOR5/LGALS9/LTF/MALT1/MAP3K13/MAP3K7/NFKB1/NLRP3/NOD1/NPM1/NTRK1/PIDD1/PRKCQ/PRKCZ/PRKD1/PRKD2/PYCARD/RBCK1/RELA/RNF25/RPS27A/RPS6KA4/RPS6KA5/S100A8/STAT3/TAB1/TLR6/TNF/TNFSF11/TNFSF18/TRADD/TRAF1/TRAF5/TRAF6/TRAPPC9/TRIM14/TRIM22/TRIM25/TRIM32/TRIM5/TRIM52/TRIM…	71
GO:0007260	BP	GO:0007260	tyrosine phosphorylation of STAT protein	44/5894	89/18866	0.000251663	0.00261947	0.0017202	CAV1/CCL5/CNOT7/CNTF/CRLF1/CSF1R/CSF2/CSH1/CTF1/EPO/ERBB4/FGFR3/FLT3/FYN/GH1/GH2/GHR/HCLS1/HDAC2/HES1/HPX/IFNA2/IFNG/IL12B/IL13/IL15/IL21/IL23A/IL3/IL4/IL6/IL6R/ISL1/JAK3/LEP/LIF/OSM/PECAM1/PIBF1/PPP2R1A/STAT3/TNF/TNFRSF1A/TNFSF18	44
GO:0014031	BP	GO:0014031	mesenchymal cell development	42/5894	84/18866	0.000252284	0.00261947	0.0017202	ALDH1A2/ALX1/ANXA6/BCL2/BMP4/BMPR1A/EDN1/ERBB4/FOXC1/FOXC2/GBX2/GDNF/HAND2/HES1/HEY2/HEYL/HTR2B/ISL1/JAG1/KITLG/KLHL12/MAPK1/NOTCH1/NRTN/OVOL2/PDCD6/PHOX2B/RET/SEMA3A/SEMA3B/SEMA3D/SEMA4A/SEMA4G/SEMA6A/SEMA6B/SEMA6C/SEMA6D/SEMA7A/SHH/SMO/SOX9/TBX1	42
GO:0045913	BP	GO:0045913	positive regulation of carbohydrate metabolic process	42/5894	84/18866	0.000252284	0.00261947	0.0017202	ADCYAP1R1/AKT2/ARNT/ARPP19/AVPR1B/BAD/DYRK2/EGF/ESRRB/FOXO1/GAPDHS/GCG/GCK/GPD1/GPLD1/GPT/HTR2A/IFNG/INS/INSR/IRS2/LHCGR/MLXIPL/NFKB1/NTSR1/P2RX7/P2RY1/PDGFB/PFKFB1/PFKFB3/PFKFB4/POU1F1/PPARA/PRKAA1/PRKCE/PSEN1/PTAFR/PTH/RANBP2/SLC25A12/SNCA/SRC	42
GO:0060393	BP	GO:0060393	regulation of pathway-restricted SMAD protein phosphorylation	33/5894	62/18866	0.000259995	0.00268735	0.00176477	ACVR1B/BMP10/BMP2/BMP3/BMP4/BMP5/BMP6/BMP8A/BMP8B/BMPR1A/BMPR2/CSNK2B/DKK1/EMILIN1/ENG/GDF11/GDF15/GDF2/GDF3/GDF5/GDF9/HFE/INHA/INHBC/INHBE/LDLRAD4/LEFTY1/MSTN/PIN1/SDCBP/SMAD4/SMAD6/TGFB2	33
GO:1904589	BP	GO:1904589	regulation of protein import	33/5894	62/18866	0.000259995	0.00268735	0.00176477	AGTR2/ANGPT1/ARHGEF5/BAG3/BMP4/CABP1/CD36/CDH1/FLNA/HCLS1/HDAC3/HYAL2/IFNG/IPO5/JUP/LEP/MAPK1/MAVS/NF1/NUP54/PDCD5/PIK3R2/PSEN1/PTGS2/RAB23/RAN/RBM22/SHH/SMAD3/SMO/TARDBP/TPR/UFM1	33
GO:0003176	BP	GO:0003176	aortic valve development	20/5894	32/18866	0.000260481	0.00268735	0.00176477	BMP4/BMPR2/ELN/EMILIN1/GATA3/GATA4/HEY2/HEYL/JAG1/NFATC1/NOS3/NOTCH1/RB1/RBPJ/ROBO1/ROCK2/SMAD6/SNAI1/SOX9/TNFRSF1A	20
GO:0045761	BP	GO:0045761	regulation of adenylate cyclase activity	20/5894	32/18866	0.000260481	0.00268735	0.00176477	AKAP5/CACNA1C/CACNA1D/CAP1/CCR2/CRHR1/DRD2/DRD3/DRD5/GABBR2/GALR1/GALR2/GNAI2/GPR87/GRM2/GRM3/HPCA/LTB4R2/NF1/NPR3	20
GO:0048771	BP	GO:0048771	tissue remodeling	78/5894	178/18866	0.00026386	0.00271357	0.00178199	ACE/ACVR2B/ADRB2/AGER/AGT/AGTR2/ATG5/ATP6AP1/BCR/BMPR2/CA2/CALCA/CARTPT/CAV1/CCR2/CHD7/CRB1/CSF1R/CSPG4/CTNNB1/DBH/DEF8/EFNA2/EPAS1/FGF8/FLT4/FOXC1/FOXC2/FSHB/GDF5/GJA1/GJA5/HAND2/HRG/HTR1B/IAPP/IGFBP5/IL12B/IL15/IL21/IL23A/IL6/ITGB3/JAG1/LEP/LIF/LRP6/LRRK1/LTBP3/MC4R/MDM2/NF1/NOS3/P2RX7/PLG/PPP3CA/PRKCA/PTH/PTK2B/RAB3D/RAC1/RBPJ/ROCK2/SPP2/SRC/SUCO/SYK/TGM2/THBS4/TNFRSF11B/TNFSF11/TP53/TPH1/TPP1…	78
GO:0060401	BP	GO:0060401	cytosolic calcium ion transport	78/5894	178/18866	0.00026386	0.00271357	0.00178199	ABL1/ADCYAP1R1/ADRA1A/AFG3L2/APLNR/ATG5/ATP2A2/ATP2B3/ATP2B4/BCL2/BDKRB1/CACNA1C/CACNA2D1/CACNB3/CALCR/CAPN3/CASQ1/CAV1/CCL21/CHD7/CLIC2/CX3CL1/DRD1/DRD2/EPO/F2/F2RL3/FAM155A/FAM155B/FASLG/FKBP1B/FYN/GRIN1/GRIN2A/GRIN2B/GRIN2C/GRIN2D/GSTM2/HAP1/HTR2A/HTR2B/HTR2C/IL13/JPH3/LETM1/LIME1/MCOLN1/MCOLN3/MICU1/MICU2/NOS1/NTSR1/P2RX3/P2RX7/PDE4D/PKD2/PRKACA/PRKCE/PTK2B/RAMP3/RASA3/RGS9/RYR3/SLC24A1/SLC24…	78
GO:0061351	BP	GO:0061351	neural precursor cell proliferation	69/5894	154/18866	0.000266715	0.00273858	0.00179842	ADCYAP1/APPL2/ARHGEF2/ASCL1/BDNF/CDH2/CDON/CEND1/CTNNB1/CX3CL1/DBN1/DCT/DISC1/DRD2/EGF/ELL3/EMX1/EMX2/EPHB1/FABP7/FGF13/FGF8/FGFR1/FGFR2/FLNA/FOXG1/FOXO1/FRS2/FZD3/FZD9/GBX2/GNAI2/GPR37L1/ID2/INSM1/KCNA1/KIF1A/LHX1/LHX5/LRP2/NES/NEUROD4/NF1/NOTCH1/NR2E1/PAFAH1B1/PAX6/PITX3/PLXNB2/POU3F2/POU3F3/PROX1/PTBP2/RAPGEF1/RPGRIP1/SHH/SIRT2/SIX3/SLC16A2/SMO/SOX5/SPINT2/TMEM14B/TP53/VEGFC/WNT1/WNT5A/WNT7A/Z…	69
GO:2000008	BP	GO:2000008	regulation of protein localization to cell surface	24/5894	41/18866	0.000272591	0.00279008	0.00183223	ABCA2/ABCA7/ACTN2/ASTN2/BDNF/CAV3/CD247/CTNNB1/EGF/ERBB4/GBF1/HFE/LEPROTL1/LRIG2/NEDD4L/PICALM/RAB11B/RAB11FIP5/RANGRF/STX3/STX4/TM9SF4/TNF/TOR1A	24
GO:2000826	BP	GO:2000826	regulation of heart morphogenesis	24/5894	41/18866	0.000272591	0.00279008	0.00183223	BMP10/BMP2/BMP4/BMPR2/CTNNB1/DKK1/ENG/EYA1/FOXC1/FOXC2/HAND2/HES1/ISL1/JAG1/NOTCH1/RBPJ/ROBO1/SMAD4/SMO/SOX9/TBX2/TGFB2/WNT11/WNT5A	24
GO:0045123	BP	GO:0045123	cellular extravasation	35/5894	67/18866	0.000276565	0.00282183	0.00185309	ADD2/AGER/BCR/BST1/CCL2/CCL21/CCL25/CCR2/CD177/CD47/CRK/CRKL/CX3CL1/FUT4/FUT7/GCNT1/GOLPH3/IL1R1/ITGA1/ITGB7/LEP/PDGFD/PECAM1/PIK3CG/PLCB1/PLVAP/PODXL2/PRTN3/PTAFR/PTGER4/SELE/SELP/SELPLG/SPN/TNF	35
GO:0071300	BP	GO:0071300	cellular response to retinoic acid	35/5894	67/18866	0.000276565	0.00282183	0.00185309	ADNP2/ALDH1A2/ATM/BRINP1/BRINP2/BRINP3/CREB1/CYP26B1/FGFR2/FZD10/FZD7/GJB3/HDAC2/LEP/LTK/MYB/MYOG/PAX2/PCK1/PPARG/PTK2B/RET/RORB/SETX/SOX9/TBX1/TWF2/WNT10B/WNT11/WNT5A/WNT6/WNT8B/YAP1/YES1/ZNF35	35
GO:0042220	BP	GO:0042220	response to cocaine	27/5894	48/18866	0.000285396	0.00290736	0.00190925	CACNG4/CHRNB2/CRH/CRHBP/DNM2/DNMT3A/DRD1/DRD2/DRD3/DRD4/DRD5/HDAC2/HTR1B/HTR2A/HTR3A/MBD1/MDM2/MTOR/OPRM1/OXT/OXTR/PITX3/PTK2B/RGS4/SLC6A3/TACR3/UBE3A	27
GO:0014074	BP	GO:0014074	response to purine-containing compound	67/5894	149/18866	0.000286383	0.00291128	0.00191183	AACS/AANAT/ABCC9/ADIPOQ/AGXT/AQP8/ASS1/CACNA1S/CIB2/CITED1/CPS1/CRHBP/DGKQ/DHODH/DMTN/DNTT/FDX1/FOSL1/GPD1/GSTM2/HCN4/HDAC2/HMGCS1/IGFBP5/IL1B/INPP5K/KCNE1/OXT/P2RX3/P2RX6/P2RX7/P2RY1/P2RY4/PCK1/PDE3A/PENK/PFKFB1/PIK3CG/PKD2/PKLR/PPARG/PRKAA1/PTAFR/PTEN/PTGS2/PTK2B/RAPGEF1/RELA/REN/RYR3/SDC1/SLC26A3/SLC5A5/SLC6A3/SLC8A1/SOD1/STAR/TAF1/THBD/TRPC3/TRPM2/TRPM4/TYR/VGF/WNT10B/WT1/ZFP36L1	67
GO:1902476	BP	GO:1902476	chloride transmembrane transport	47/5894	97/18866	0.00028668	0.00291128	0.00191183	ANO2/ANO3/BEST1/BEST2/CASR/CLCA1/CLCA2/CLCC1/CLCN1/CLCN4/CLCN5/CLCN6/CLCNKB/CLIC1/CLIC2/FXYD3/GABRA1/GABRA2/GABRA3/GABRA4/GABRA5/GABRB1/GABRB2/GABRB3/GABRD/GABRG2/GABRG3/GABRQ/GABRR2/GLRA1/GLRA2/GLRA3/GLRB/SLC12A1/SLC12A2/SLC12A3/SLC12A4/SLC12A5/SLC17A7/SLC1A1/SLC1A3/SLC26A1/SLC26A10/SLC26A3/SLC26A4/SLC4A1/SLC4A8	47
GO:0016577	BP	GO:0016577	histone demethylation	19/5894	30/18866	0.00028995	0.00293989	0.00193061	HR/HSF4/JARID2/JMJD6/KDM2A/KDM3A/KDM3B/KDM4C/KDM4D/KDM5A/KDM5B/KDM5C/KDM5D/KDM6B/KDM7A/KDM8/PHF2/PHF8/UTY	19
GO:0072089	BP	GO:0072089	stem cell proliferation	59/5894	128/18866	0.000290508	0.00294094	0.0019313	ACE/AGO3/ARHGEF2/ARIH2/ASCL1/BDNF/CITED1/CTC1/CTNNB1/CX3CL1/DCT/DISC1/DRD2/ETV6/FGF13/FGFR1/FGFR2/FOXG1/FRS2/FZD3/FZD9/GJA1/KAT7/KCNA1/KITLG/LTBP3/N4BP2L2/NANOG/NES/NEUROD4/NF1/NOTCH1/NR2E1/OVOL2/PAFAH1B1/PAX6/PDCD2/PLXNB2/RNF43/SHH/SIRT6/SIX2/SIX3/SMO/SOX18/SOX5/TBX3/TERT/THPO/TP53/VEGFC/WNT1/WNT10B/WNT2B/WNT5A/YAP1/YTHDF2/ZFP36L1/ZNF335	59
GO:0021954	BP	GO:0021954	central nervous system neuron development	41/5894	82/18866	0.000297308	0.00298724	0.00196171	ARHGAP35/ASCL1/B4GALT6/CHRNB2/CNTN2/CRK/CRKL/DCC/DCLK2/DISC1/DRD1/DRD2/EPHA4/EPHB1/EPHB3/FEZF2/FGF8/FGFR2/FOXG1/GABRB1/GBX2/LEP/LHX6/MAP2/NDEL1/NIN/NR2E1/PAFAH1B1/PHOX2B/PTEN/RAC3/ROBO1/SCN1B/SEMA3A/SLC4A10/SOX1/SPTBN4/SZT2/TCTN1/TSKU/WNT5A	41
GO:1902930	BP	GO:1902930	regulation of alcohol biosynthetic process	41/5894	82/18866	0.000297308	0.00298724	0.00196171	ADCYAP1R1/AVPR1B/BMP2/BMP5/BMP6/CYP7A1/DGKQ/ERLIN2/FASN/FDFT1/FGF1/GFI1/GGPS1/H6PD/HMGCS1/IDI1/IFNG/IL1B/LHCGR/LPCAT3/MBTPS2/MVD/NFKB1/NFYB/NFYC/NTSR1/P2RY1/POU1F1/PRKAA1/PTAFR/PTH/PTK2B/RAN/REST/SC5D/SNCA/SOD1/SREBF2/TNF/VDR/WNT4	41
GO:0001867	BP	GO:0001867	complement activation	lectin pathway	10/5894	12/18866	0.00029877	0.00298724	0.00196171	A2M/COLEC10/COLEC11/FCN2/FCN3/KRT1/MASP1/MASP2/MBL2/SERPING1	10
GO:0002024	BP	GO:0002024	diet induced thermogenesis	10/5894	12/18866	0.00029877	0.00298724	0.00196171	ADRB1/ADRB2/APPL2/BMP8A/MC4R/SCT/SCTR/SORL1/TRPV4/UCP1	10
GO:0042711	BP	GO:0042711	maternal behavior	10/5894	12/18866	0.00029877	0.00298724	0.00196171	AVP/AVPR1A/BRINP1/DBH/DRD1/KALRN/NPAS1/OXT/OXTR/PTEN	10
GO:0051583	BP	GO:0051583	dopamine uptake involved in synaptic transmission	10/5894	12/18866	0.00029877	0.00298724	0.00196171	DRD1/DRD2/DRD3/DRD4/GDNF/RAB3B/SLC6A2/SLC6A3/SNCA/TOR1A	10
GO:0051934	BP	GO:0051934	catecholamine uptake involved in synaptic transmission	10/5894	12/18866	0.00029877	0.00298724	0.00196171	DRD1/DRD2/DRD3/DRD4/GDNF/RAB3B/SLC6A2/SLC6A3/SNCA/TOR1A	10
GO:0060746	BP	GO:0060746	parental behavior	10/5894	12/18866	0.00029877	0.00298724	0.00196171	AVP/AVPR1A/BRINP1/DBH/DRD1/KALRN/NPAS1/OXT/OXTR/PTEN	10
GO:0051346	BP	GO:0051346	negative regulation of hydrolase activity	183/5894	473/18866	0.000299686	0.00299178	0.00196469	A2M/ABL1/ADCYAP1/AGT/AMBP/AMOT/ANGPTL3/ANGPTL4/APCS/APLP2/APOA2/APOC3/ARL2/ARPP19/AVP/BAG4/BBS4/BCAS3/BIN1/BIRC3/BIRC7/C3/C5/CAAP1/CABIN1/CAMK2A/CARD8/CD44/CDC42SE1/CDKN2D/CEP192/CR1/CSN2/CSRNP2/CSRNP3/CST5/CST7/CST8/DDX3X/DNAJB6/DPEP1/EGLN1/ELL/FABP1/FETUB/FICD/FKBP15/FKBP1B/FZD10/GAPDH/GAS6/GMIP/GNAI2/GNAT1/GPC3/GPS1/GPS2/GPX1/GZMA/HDAC9/HGF/HRAS/HRG/IKBKB/IPO5/IQGAP1/IQGAP2/ITIH1/ITIH2/ITIH3/K…	183
GO:0090100	BP	GO:0090100	positive regulation of transmembrane receptor protein serine/threonine kinase signaling pathway	52/5894	110/18866	0.000304012	0.00303029	0.00198998	ACVR1B/ACVR2B/BMP10/BMP2/BMP3/BMP4/BMP5/BMP6/BMP8A/BMP8B/BMPR1A/BMPR2/CDH5/CDKN1C/CDKN2B/CITED1/CREBBP/CSNK2B/ENG/EP300/FBXL15/FGF9/GATA4/GDF11/GDF15/GDF2/GDF3/GDF5/GDF9/GPC3/HES1/HFE/ING2/INHA/INHBC/INHBE/KIAA0319/LEFTY1/MSTN/MSX1/NOTCH1/NUMA1/PELO/RBPJ/RNF111/SDCBP/SH2B1/SLC2A10/SMAD2/SMAD4/STK11/TGFB2	52
GO:0048675	BP	GO:0048675	axon extension	57/5894	123/18866	0.00030744	0.00305976	0.00200933	ABL1/ADNP/ANAPC2/ARHGAP4/BDNF/BMPR2/CDH4/CDK5R1/CDKL3/CDKL5/DBN1/DISC1/DNM2/DPYSL2/DSCAM/IFRD1/KIAA0319/L1CAM/LRP1/MAG/MAP2/MAP3K13/MEGF8/MT3/NDEL1/NDN/NLGN3/NTN1/OLFM1/PAFAH1B1/POU4F2/POU4F3/PPP3CB/PTPRS/RAB21/RNF6/RTN4/SEMA3A/SEMA3B/SEMA3D/SEMA4A/SEMA4G/SEMA6A/SEMA6B/SEMA6C/SEMA6D/SEMA7A/SLC9A6/SLIT1/SPG11/SRF/TNR/TRIM46/TRPC5/TWF2/ULK2/WNT5A	57
GO:0001662	BP	GO:0001662	behavioral fear response	23/5894	39/18866	0.000313312	0.00309916	0.00203521	ADCYAP1/ASIC1/ASIC4/BCL2/BDNF/BRINP1/CCK/CRH/DRD1/DRD4/GABRA5/GJA1/GRIK2/HTR1A/HTR2C/MAPK8IP2/MECP2/MORC1/NEUROD2/NPY2R/NR2E1/PENK/VDAC3	23
GO:0038179	BP	GO:0038179	neurotrophin signaling pathway	23/5894	39/18866	0.000313312	0.00309916	0.00203521	AGT/AGTR2/BDNF/CASP3/DOK5/FRS2/GRB2/HAP1/KIDINS220/MAGI2/NDN/NGF/NGFR/NTF3/NTRK1/PPP2R5B/PTPN11/RAPGEF1/SLC9A6/SOS1/SPRY2/SRC/WASF1	23
GO:0051931	BP	GO:0051931	regulation of sensory perception	23/5894	39/18866	0.000313312	0.00309916	0.00203521	ADORA1/ADRA2C/CACNB3/CCK/COMT/EDN1/FABP5/GRIN2D/GRM1/MTOR/NPFF/NPY2R/NTSR1/OPRL1/OPRM1/OXT/P2RX3/PTAFR/SCN11A/SMR3A/SMR3B/VIP/ZFHX2	23
GO:0086091	BP	GO:0086091	regulation of heart rate by cardiac conduction	23/5894	39/18866	0.000313312	0.00309916	0.00203521	BIN1/CACNA1C/CACNA1D/CACNA1G/CACNA2D1/CAV1/CTNNA3/DSP/GJA5/HCN4/JUP/KCNE1/KCNE4/KCNH6/KCNJ2/KCNJ3/KCNJ5/PKP2/SCN1B/SCN3B/SCN5A/TRPM4/YWHAE	23
GO:0046545	BP	GO:0046545	development of primary female sexual characteristics	50/5894	105/18866	0.000316522	0.00312138	0.0020498	ACVR1B/ADCYAP1/ADCYAP1R1/AFP/AMHR2/ATM/BCL2/BCL2L1/BMPR1B/CASP3/CYP19A1/DACH1/DMC1/EIF2B2/ESR1/FOXC1/FSHB/FSHR/GDF9/GNRH1/HYAL3/IDH1/INHA/INSR/KITLG/KMT2B/LEP/LFNG/LHCGR/MSH4/NOS3/NR5A1/NRIP1/NUPR1/PCYT1B/PGR/PLEKHA1/PTX3/RETN/SGPL1/SMAD4/SOD1/SPO11/SRC/STAT5B/UBE3A/VGF/WNT4/WT1/ZFPM2	50
GO:1902414	BP	GO:1902414	protein localization to cell junction	50/5894	105/18866	0.000316522	0.00312138	0.0020498	ACTB/ACTN4/ADAM22/BSN/CACNG2/CACNG3/CACNG4/CACNG5/CDH5/CEP112/CLSTN3/DAG1/DBN1/DLG1/DLG4/DLG5/FLNA/GHSR/GPC4/GPHN/GRIN1/GRIN2A/GRIN2C/GRIP1/GRIP2/HEG1/HRAS/IQSEC2/KIF17/KIF3A/KIF5A/KIF5B/LAMTOR2/MAPK10/MAPK8IP3/MAPK9/NPHS1/NPTN/NRXN2/PCLO/PRKCZ/RAPSN/SCRIB/SHANK1/SNAP25/STX3/TERF2/VPS35/WNT5A/WNT7A	50
GO:0050852	BP	GO:0050852	T cell receptor signaling pathway	88/5894	206/18866	0.000318483	0.00313594	0.00205936	ABL1/BTN1A1/BTN2A1/BTN2A2/BTN2A3P/BTNL2/BTNL3/CACNA1F/CACNB3/CD160/CD226/CD247/CD28/CD3D/CD3E/CD3G/CHUK/CRKL/CYLD/EIF2B1/EIF2B2/EIF2B3/ELF1/ERMAP/FOXP3/FYN/GATA3/GRAP2/HHLA2/HLA-DPA1/HLA-DPB1/HLA-DQA1/HLA-DQB1/HLA-DRA/HLA-DRB4/HRAS/IKBKB/ITK/KCNN4/LAT/LIME1/MALT1/MAP3K7/MAPK1/MOG/NCK1/NFKB1/PAK3/PDE4B/PDE4D/PIK3CB/PIK3R2/PRKCQ/PRKD2/PSEN1/PSMA5/PSMB6/PSMB7/PSMC3/PSMC4/PSMC5/PSMC6/PSMD1/PSMD12/PSM…	88
GO:0001964	BP	GO:0001964	startle response	18/5894	28/18866	0.000320114	0.00314722	0.00206677	BACE1/CTNNA2/DRD1/DRD2/DRD3/FABP7/GLRA1/GLRB/GRIN1/GRIN2A/GRIN2D/KCNA1/KCNH1/MECP2/NPAS1/PENK/PTEN/SLC6A3	18
GO:0017156	BP	GO:0017156	calcium-ion regulated exocytosis	34/5894	65/18866	0.000325616	0.00319163	0.00209593	ADRA2A/ATP2A2/BAIAP3/CACNA1G/CACNA1I/CADPS/CADPS2/CDK5R2/DOC2A/DOC2B/GNAI2/HYAL3/NOTCH1/PPP3CB/RAB3A/RAB3GAP1/RAPGEF4/REST/RIMS3/RPH3AL/SCAMP5/STXBP1/SYN2/SYT1/SYT11/SYT12/SYT13/SYT17/SYT2/SYT5/TRIM9/TRPV6/UNC13A/VAMP7	34
GO:0060675	BP	GO:0060675	ureteric bud morphogenesis	34/5894	65/18866	0.000325616	0.00319163	0.00209593	AGT/AGTR2/BCL2/BMP2/BMP4/CITED1/CTNNB1/DCHS1/DLG1/EYA1/FGF1/FGF8/GATA3/GDNF/GPC3/GREB1L/HES1/LHX1/PAX2/PAX8/PKD2/PTCH1/SALL1/SHH/SIX2/SMAD4/SMO/SOX9/WNT1/WNT11/WNT2B/WNT4/WNT6/WT1	34
GO:0048168	BP	GO:0048168	regulation of neuronal synaptic plasticity	29/5894	53/18866	0.000326467	0.00319513	0.00209823	AGT/ARC/CAMK2A/CAMK2B/CLN3/CNTN2/DBN1/DLG4/DRD2/GRIK2/GRIN1/GRM5/HRAS/JPH3/KCNJ10/KRAS/MCTP1/NEURL1/NF1/NPTN/PPFIA3/RAB3A/RAB3GAP1/RASGRF1/SLC4A10/STAR/SYNPO/SYP/UNC13A	29
GO:0055123	BP	GO:0055123	digestive system development	66/5894	147/18866	0.000333569	0.00325972	0.00214064	ACVR2B/AHI1/ALDH1A2/ALX4/ASCL1/ASS1/BARX1/BBS7/BCL2/BMP4/CBFA2T2/CCDC40/CDKN1A/CDX2/CPS1/CRKL/CTNNB1/DAB1/DCHS1/DNAAF1/EPB41L5/EPHB3/FGF9/FGFR2/FOXF2/FOXL1/GATA4/GIP/HES1/HIP1R/HOXA5/HRH2/ID2/INSR/MEGF8/NIPBL/NKX2-2/NKX3-2/NOTCH1/OTC/OVOL2/OXTR/PDX1/PYY/RB1/RET/SALL1/SCT/SFRP5/SHH/SIX2/SMAD2/SMAD3/SMO/SRC/TBX2/TCF7/TGFB2/TNF/VPS52/WDR19/WNT11/WNT5A/YAP1/YIPF6/ZIC3	66
GO:0009132	BP	GO:0009132	nucleoside diphosphate metabolic process	69/5894	155/18866	0.000335423	0.0032729	0.0021493	AAAS/AK1/AK5/ALDOA/ALDOC/AMPD3/ARNT/BAD/BPGM/CBFA2T3/DLG1/EIF6/ENO3/ENTPD2/ENTPD3/ENTPD4/EP300/ESRRB/GAPDH/GAPDHS/GCK/GPD1/GPI/HDAC4/HKDC1/HTR2A/IFNG/INS/INSR/MLXIPL/MPP1/MYOG/NME3/NME7/NUDT18/NUDT7/NUDT9/NUP188/NUP214/NUP54/NUP88/NUP98/NUPR1/OGDH/OGDHL/OGT/P2RX7/PFKFB1/PFKFB3/PFKFB4/PFKL/PFKP/PGAM1/PGK1/PGK2/PKLR/POM121/PPARA/PRKAA1/PRKAG2/PSEN1/RANBP2/SEC13/SEH1L/SIRT6/SLC4A1/STAT3/TPI1/TPR	69
GO:0051259	BP	GO:0051259	protein complex oligomerization	97/5894	231/18866	0.000339918	0.00331177	0.00217483	ADCY8/ALDH1A2/ALDOA/ALOX5AP/APPL2/AQP2/AQP4/ARC/ASIC1/C9/CBY1/CD74/CRTC1/CRTC3/CRYZ/CTH/CUTC/DNM1L/EHD1/EHD4/G3BP2/GLRA3/GNMT/GRIN1/GRIN2B/HGSNAT/HSD17B10/HSD17B8/IKZF4/JMJD6/KCNA1/KCNA10/KCNA2/KCNA3/KCNA4/KCNB2/KCNC1/KCNC2/KCNC3/KCNC4/KCND1/KCNF1/KCNG1/KCNJ2/KCNS1/KCNV1/KCNV2/KCTD13/KCTD15/KCTD17/KCTD2/KCTD5/KCTD9/KIF25/KRT1/LETM1/MAT1A/MAT2A/MCOLN1/MICU1/MIF/MIP/MPP2/P2RX3/PFKL/PFKP/PKD2/PKD2L1…	97
GO:0016050	BP	GO:0016050	vesicle organization	136/5894	340/18866	0.000347026	0.00337414	0.00221578	AGFG1/AKT2/ANKFY1/ANKRD27/ANKRD28/AP1G1/AP3D1/ARFGAP2/ARFGEF2/ASIP/BAIAP3/BCL2/C2CD5/CAV1/CHMP1B/CHMP6/CHMP7/CLN3/CNIH3/CPLX2/CPLX3/CREB1/CSNK1D/DLG4/DNM2/DNM3/DOC2B/DYSF/F2RL3/F5/F8/FASLG/FNBP1L/GBF1/GOLPH3/GOSR1/GOSR2/GPR143/GRIA1/GRIK5/HGS/HOOK2/HPS1/INSIG1/IST1/KIF13A/KIF5B/KLHL12/LMAN1/MIA3/P2RX7/PAFAH1B1/PDCD6/PICALM/PIK3C3/PIKFYVE/PLA2G3/PMEL/PPP6C/RAB13/RAB1A/RAB1B/RAB22A/RAB38/RAB3A/RAB7…	136
GO:0043627	BP	GO:0043627	response to estrogen	38/5894	75/18866	0.000347361	0.00337414	0.00221578	ABCC2/APOA2/ARID5A/ASH2L/BCAS3/CA2/CAV1/CCND1/CITED1/COMT/CRH/CRHBP/EP300/EPO/ESR1/F7/GAL/GATA3/GHRHR/GSTM3/IGFBP2/IL4R/KMT2D/KRT19/MAPK1/MDM2/MSTN/PELP1/PPARG/RARA/SERPINB9/SLC34A2/SMAD6/STAR/TNFRSF11B/TRIM24/TRIM25/WNT7A	38
GO:0031110	BP	GO:0031110	regulation of microtubule polymerization or depolymerization	42/5894	85/18866	0.000349334	0.00338283	0.00222149	ABL1/ANKRD53/APC/APC2/ARHGEF2/ARL2/CAV3/CDH5/CDK5R1/CDK5RAP2/CDKN1B/CIB1/CLASP1/DCTN1/FES/FGF13/FKBP4/GAS2L1/HDAC6/INPP5J/MAP1S/MAP2/MAPRE2/MAPRE3/MECP2/MID1/MID1IP1/NAV3/NIN/NUMA1/RAC1/RANGRF/SNCA/SPEF1/STMN2/STMN3/STMN4/TAOK1/TBCD/TRPV4/TTBK2/TUBB4A	42
GO:0110110	BP	GO:0110110	positive regulation of animal organ morphogenesis	42/5894	85/18866	0.000349334	0.00338283	0.00222149	AGT/AGTR2/AMELX/BMP10/BMP2/BMP4/CDC42/CSF1/CTNNB1/DKK1/EDN1/ENG/FGF1/FGF8/FGFR1/FGFR2/FRS2/GATA3/GDNF/HAND2/HPN/JAG1/LHX1/LIF/NGFR/NOTCH1/PAX2/PAX8/RBPJ/ROBO1/SMAD4/SMO/SOX9/TFAP2A/TGFB2/VDR/WNT11/WNT2B/WNT4/WNT5A/WNT6/WT1	42
GO:0035235	BP	GO:0035235	ionotropic glutamate receptor signaling pathway	17/5894	26/18866	0.000349822	0.00338283	0.00222149	CDK5R1/CLN3/GRIA1/GRIA2/GRIA3/GRIA4/GRIK1/GRIK2/GRIK3/GRIK4/GRIK5/GRIN1/GRIN2A/GRIN2B/GRIN2C/GRIN2D/PTK2B	17
GO:0006110	BP	GO:0006110	regulation of glycolytic process	40/5894	80/18866	0.000350443	0.00338378	0.00222212	AAAS/ARNT/CBFA2T3/EIF6/EP300/ESRRB/GAPDHS/GCK/GPD1/HDAC4/HTR2A/IFNG/INS/INSR/MLXIPL/MYOG/NUP188/NUP214/NUP54/NUP88/NUP98/NUPR1/OGT/P2RX7/PFKFB1/PFKFB3/PFKFB4/PGAM1/POM121/PPARA/PRKAA1/PRKAG2/PSEN1/RANBP2/SEC13/SEH1L/SIRT6/SLC4A1/STAT3/TPR	40
GO:0032526	BP	GO:0032526	response to retinoic acid	51/5894	108/18866	0.000356935	0.00344134	0.00225992	ADNP2/ALDH1A2/ASCL1/ATM/BMP6/BRINP1/BRINP2/BRINP3/CDKN2D/CREB1/CYP26B1/DKK1/FGFR2/FZD10/FZD7/GDAP2/GJA1/GJB3/HDAC2/HSD17B2/IGFBP2/LEP/LTK/MYB/MYOG/OXT/PAX2/PCK1/PPARG/PTCH1/PTK2B/RARA/RBP4/RET/RORB/RXRA/RXRB/RXRG/SETX/SOX9/TBX1/TIE1/TWF2/WNT10B/WNT11/WNT5A/WNT6/WNT8B/YAP1/YES1/ZNF35	51
GO:0006475	BP	GO:0006475	internal protein amino acid acetylation	73/5894	166/18866	0.0003588	0.00344779	0.00226415	ACTL6B/APBB1/ATAT1/ATF2/ATG5/BAG6/BRD1/BRD7/BRD8/BRPF1/CDY1/CHD5/CREBBP/CTBP1/DPF3/DR1/EID1/EP300/EP400/FOXP3/GATA3/GLYR1/IL1B/ING3/ING4/IRF4/ISL1/JADE3/KANSL3/KAT5/KAT6A/KAT7/KAT8/KMT2A/LIF/MAP3K7/MBD3/MCM3AP/MCRS1/MEAF6/MECP2/MORF4L1/MSL1/MSL3/MYOD1/NAA60/NAP1L2/NAT8B/NCOA3/NOS1/OGT/PHF10/PHF20/PIH1D1/POLE3/RPS6KA4/RPS6KA5/SETD5/SMAD4/SMARCB1/SNCA/SPHK2/SRCAP/TADA3/TAF1/TAF10/TAF12/TAF6L/TAF7/T…	73
GO:0086010	BP	GO:0086010	membrane depolarization during action potential	22/5894	37/18866	0.0003592	0.00344779	0.00226415	CACNA1C/CACNA1D/CACNA1G/CACNA1I/CACNA2D1/CAV3/GJA5/HCN4/KCNJ2/RANGRF/SCN10A/SCN11A/SCN1A/SCN1B/SCN2A/SCN3A/SCN3B/SCN4A/SCN5A/SCN8A/SLC8A1/TRPM4	22
GO:1905314	BP	GO:1905314	semi-lunar valve development	22/5894	37/18866	0.0003592	0.00344779	0.00226415	BMP4/BMPR2/ELN/EMILIN1/GATA3/GATA4/GJA5/HEY2/HEYL/JAG1/NFATC1/NOS3/NOTCH1/RB1/RBPJ/ROBO1/ROCK2/SMAD6/SNAI1/SOX9/TGFB2/TNFRSF1A	22
GO:0010876	BP	GO:0010876	lipid localization	171/5894	440/18866	0.000361113	0.00345696	0.00227017	ABCA2/ABCA3/ABCA4/ABCA7/ABCB11/ABCB4/ABCC2/ABCC3/ABCD1/ABCD2/ABCD4/ACE/ACSL1/ADIPOQ/AGT/AGTR2/AKR1C4/AKT2/ANGPTL3/ANO3/APOA2/APOA4/APOC3/APOF/APOH/APOL3/APOL6/ASXL2/ATP10A/ATP10D/ATP11A/ATP11B/ATP8A2/ATP8B1/ATP8B2/ATP8B3/ATP8B4/ATP9A/AVPR1B/BMP6/C1QTNF1/C3/CASR/CAV1/CD36/CDS2/CEL/CETP/CFHR4/CHKA/CLN3/CPT1A/CRH/CRHR1/CRP/CYP19A1/CYP4A11/CYP4F2/DRD2/DRD3/DRD4/DYSF/EDN1/EGF/EHD1/FABP1/FABP2/FABP3/FA…	171
GO:0070665	BP	GO:0070665	positive regulation of leukocyte proliferation	67/5894	150/18866	0.000361223	0.00345696	0.00227017	AGER/AIF1/BCL2/BST1/CCL5/CCR2/CD1D/CD209/CD28/CD3E/CD40LG/CD46/CD6/CD70/CD74/CDKN1A/CHRNB2/CSF1/CSF1R/EBI3/EPO/FLT3LG/FOXP3/GPR183/HES1/HHLA2/HLA-DMB/HLA-DPA1/HLA-DPB1/HLA-E/IGFBP2/IL12B/IL12RB1/IL13/IL15/IL1B/IL21/IL23A/IL4/IL5/IL5RA/IL6/IRS2/JAK3/KITLG/LEP/LGALS9/MAPK1/MIF/NCK1/NCKAP1L/PDCD1LG2/PNP/PRKCQ/PTH/PTPN22/PYCARD/SHH/SPTA1/STAT5B/SYK/TAC1/TNFRSF4/TNFSF9/TRAF6/VTCN1/ZNF335	67
GO:0043687	BP	GO:0043687	post-translational protein modification	144/5894	363/18866	0.000364703	0.00348512	0.00228867	ABCA2/AFP/AGTPBP1/ALB/AMBN/AMELX/APLP2/APOA2/ASB1/ASB13/ASB4/ASB6/ASB7/ASB9/ATG12/ATG5/ATG7/BMP4/BTBD1/C3/CCDC22/CDH2/CHGB/CHM/CISH/CKAP4/COPS2/COPS3/COPS6/COPS7A/COPS7B/CP/CRTAP/CSF1/CUL2/CUL4A/CUL5/CUL7/CUL9/DCAF16/DCAF17/DCAF4/DCAF6/DCAF8/DDA1/DDB2/DMP1/DNAJC3/EPAS1/ERCC8/F5/FBXL14/FBXL15/FBXL18/FBXL4/FBXL8/FBXO17/FBXO2/FBXO21/FBXO22/FBXO31/FBXO4/FBXO40/FBXW12/FBXW2/FBXW4/FEM1B/FN3K/FOLH1/FOLH…	144
GO:0035815	BP	GO:0035815	positive regulation of renal sodium excretion	11/5894	14/18866	0.000365494	0.00348753	0.00229025	AGT/AGTR2/AVPR1A/DRD2/DRD3/EDN1/GNAI2/NPPB/OXT/SNX5/TAC1	11
GO:0098656	BP	GO:0098656	anion transmembrane transport	127/5894	315/18866	0.000367021	0.00349695	0.00229644	ABCD1/ABCD2/ABCD4/AGT/AKT2/ANKH/ANO2/ANO3/BEST1/BEST2/CASR/CLCA1/CLCA2/CLCC1/CLCN1/CLCN4/CLCN5/CLCN6/CLCNKB/CLIC1/CLIC2/CPT1A/FXYD3/GABRA1/GABRA2/GABRA3/GABRA4/GABRA5/GABRB1/GABRB2/GABRB3/GABRD/GABRG2/GABRG3/GABRQ/GABRR2/GJA1/GLRA1/GLRA2/GLRA3/GLRB/GRM5/IRS2/KCNJ10/LRP2/LRRC8B/LRRC8E/MID1IP1/MPC2/MTOR/NTSR1/PRAF2/PRKAG2/PSEN1/PTAFR/RGS4/SLC12A1/SLC12A2/SLC12A3/SLC12A4/SLC12A5/SLC13A1/SLC13A2/SLC1…	127
GO:0002576	BP	GO:0002576	platelet degranulation	59/5894	129/18866	0.000373984	0.00355807	0.00233657	A2M/ACTN2/ACTN4/ALB/ALDOA/APLP2/APOH/CD36/CD63/CD9/CDC37L1/CTSW/CYB5R1/DMTN/EGF/F5/F8/FGB/FLNA/GAS6/HGF/HRG/ITGA2B/ITGB3/ITIH3/KNG1/MAGED2/MANF/NHLRC2/OLA1/ORM1/PCDH7/PCYOX1L/PDGFB/PECAM1/PF4/PLG/POTEKP/PPBP/SCG3/SELP/SERPINA3/SERPINF2/SERPING1/SOD1/SPP2/SRGN/STXBP1/STXBP2/SYK/TEX264/TGFB2/TIMP3/TMSB4X/TOR4A/TTN/TUBA4A/VEGFC/VTI1B	59
GO:0035176	BP	GO:0035176	social behavior	28/5894	51/18866	0.000382298	0.00362555	0.00238089	ATXN1/AVP/AVPR1A/BBS4/BRINP1/CHRNB2/DLG4/DRD3/DRD4/GAD1/GNB1L/GRIN1/GRPR/KALRN/MAPK8IP2/MECP2/MTOR/NLGN3/NLGN4X/NLGN4Y/NR2E1/NRXN2/OXT/OXTR/PTEN/SHANK1/TBX1/TH	28
GO:0050435	BP	GO:0050435	amyloid-beta metabolic process	28/5894	51/18866	0.000382298	0.00362555	0.00238089	ABCA2/ABCA7/ACE/APH1A/BACE1/BIN1/CASP3/EPHA4/GGA3/GSAP/GSK3A/HAP1/IDE/IFNG/MGAT3/NAT8B/PICALM/PIN1/PSEN1/PSENEN/RELA/REN/ROCK2/SORL1/SPON1/TMED10/TNF/UNC13A	28
GO:0032946	BP	GO:0032946	positive regulation of mononuclear cell proliferation	62/5894	137/18866	0.000383315	0.00362555	0.00238089	AGER/AIF1/BCL2/BST1/CCL5/CCR2/CD1D/CD209/CD28/CD3E/CD40LG/CD46/CD6/CD70/CD74/CDKN1A/CHRNB2/CSF1/EBI3/EPO/FLT3LG/FOXP3/GPR183/HES1/HHLA2/HLA-DMB/HLA-DPA1/HLA-DPB1/HLA-E/IGFBP2/IL12B/IL12RB1/IL13/IL15/IL1B/IL21/IL23A/IL4/IL5/IL6/IRS2/JAK3/LEP/LGALS9/MIF/NCK1/NCKAP1L/PDCD1LG2/PNP/PRKCQ/PTPN22/PYCARD/SHH/SPTA1/STAT5B/SYK/TAC1/TNFRSF4/TNFSF9/TRAF6/VTCN1/ZNF335	62
GO:0071326	BP	GO:0071326	cellular response to monosaccharide stimulus	62/5894	137/18866	0.000383315	0.00362555	0.00238089	AACS/ADCY8/ADRA2A/AGER/BAD/BAIAP3/BRSK2/CASR/CDK16/CPB2/CRH/CYP7A1/ENDOG/EPHA5/ERN1/FKBP1B/GAS6/GATA4/GCG/GHRHR/GPLD1/GPR27/GPR68/GRIK5/HMGN3/IRS2/KIF5B/LEP/LIN28A/LRP1/MLXIPL/MPC2/NADK/NR1H4/PAX2/PCK1/PDK3/PDX1/PIH1D1/PLA2G6/POLG/PPP3CA/PPP3CB/PRKAA1/PRKACA/PRKCE/RAB11B/RAB11FIP5/RAC1/SIDT2/SLC29A1/SLC2A5/SMARCA4/SMARCB1/SRF/STAR/STX4/SYBU/TH/TRPM4/VSNL1/ZNF236	62
GO:0042181	BP	GO:0042181	ketone biosynthetic process	25/5894	44/18866	0.000386187	0.00364207	0.00239174	ADM/BMP2/BMP5/BMP6/COQ10B/COQ2/COQ3/COQ6/COQ7/CYP11B1/CYP11B2/CYP19A1/DGKQ/DKKL1/FDXR/FSHB/H6PD/HSD17B3/NDUFA9/PDSS2/REST/SRD5A2/STAR/TPI1/WNT4	25
GO:1903539	BP	GO:1903539	protein localization to postsynaptic membrane	25/5894	44/18866	0.000386187	0.00364207	0.00239174	ADAM22/CACNG2/CACNG3/CACNG4/CACNG5/DAG1/DLG1/DLG4/GHSR/GPC4/GPHN/GRIN1/GRIN2A/GRIN2C/GRIP1/GRIP2/HRAS/IQSEC2/MAPK10/PRKCZ/RAPSN/SCRIB/SNAP25/STX3/VPS35	25
GO:0019318	BP	GO:0019318	hexose metabolic process	105/5894	254/18866	0.000397356	0.00374196	0.00245734	ADIPOQ/AKT2/ALDH1A1/ALDOA/ALDOC/ARPP19/ATF4/BAD/BPGM/BRS3/C1QTNF1/C1QTNF3/COX11/CPT1A/CREM/DCXR/DGKQ/DLAT/DYRK2/ENO3/EP300/ESRRB/FABP5/FOXO1/FPGT/FUT4/FUT5/FUT7/G6PC2/G6PC3/GALK2/GAPDH/GAPDHS/GCG/GCGR/GCK/GNB3/GNMT/GPD1/GPD2/GPI/GPLD1/GPT/GSK3A/H6PD/HKDC1/INPP5K/INS/INSR/IRS2/KHK/LCMT1/LEP/MAN2A1/MAN2A2/MAN2C1/MDH1/MDH2/MPI/MST1/MTOR/OAS1/OGT/ONECUT1/PASK/PCK1/PDHA1/PDHA2/PDK3/PDX1/PFKFB1/PFKFB3/…	105
GO:0007398	BP	GO:0007398	ectoderm development	15/5894	22/18866	0.000400358	0.00375931	0.00246872	BMPR1A/CTNNB1/EDA2R/ELF5/EPB41L5/ETS2/FZD7/KRT6B/LHX1/SHH/SMURF1/VAX2/VPS52/ZBTB17/ZBTB7B	15
GO:0043369	BP	GO:0043369	CD4-positive or CD8-positive	alpha-beta T cell lineage commitment	15/5894	22/18866	0.000400358	0.00375931	0.00246872	BATF/BCL2/CYLD/FOXP3/IL12B/IL12RB1/IL23A/IL6/IRF4/MTOR/SHH/SPN/STAT3/STAT6/TBX21	15
GO:0030252	BP	GO:0030252	growth hormone secretion	12/5894	16/18866	0.000403671	0.00376314	0.00247124	ADCYAP1/CDK16/CHD7/DRD2/GHRH/GHRHR/GHSR/KALRN/KISS1/LTBP4/PTPN11/RAB1A	12
GO:0035930	BP	GO:0035930	corticosteroid hormone secretion	12/5894	16/18866	0.000403671	0.00376314	0.00247124	AGT/AGTR2/BMP6/C1QTNF1/CRH/CRHR1/GAL/GALR1/POMC/PTPN11/REN/TAC1	12
GO:0072176	BP	GO:0072176	nephric duct development	12/5894	16/18866	0.000403671	0.00376314	0.00247124	AHI1/BMP4/EFNB2/EPHA4/EPHA7/GATA3/GPC3/GREB1L/LHX1/PAX2/PKD2/WNT11	12
GO:0097091	BP	GO:0097091	synaptic vesicle clustering	12/5894	16/18866	0.000403671	0.00376314	0.00247124	BRSK2/CDH2/CTNNB1/MAGI2/NLGN3/PCLO/PTEN/RAB3A/SYN1/SYN2/SYN3/SYNDIG1	12
GO:1900451	BP	GO:1900451	positive regulation of glutamate receptor signaling pathway	12/5894	16/18866	0.000403671	0.00376314	0.00247124	ADRB2/ARC/CACNG2/CACNG3/CACNG4/CCL2/CCR2/IFNG/NECAB2/NLGN3/RGS9/UNC13A	12
GO:0001906	BP	GO:0001906	cell killing	75/5894	172/18866	0.000409722	0.00381406	0.00250468	AGER/AP1G1/BAD/C3/C9/CAMP/CCL13/CD160/CD1B/CD1D/CD226/CEBPG/CFHR2/CFHR5/CLEC7A/CRK/CRTAM/DEFA4/DEFA5/DEFA6/F2/F2RL1/FCGR2B/GAPDH/HLA-E/HRG/HTN1/HTN3/IFNG/IL12B/IL12RB1/IL13/IL18RAP/IL21/IL23A/IL4/IL7R/KIR2DL4/KIR3DL1/KRT6A/LAG3/LAMP1/LEP/LGALS9/LTF/LYZ/MBL2/MICA/MR1/MUC7/NCR1/NCR3/NOS2/P2RX7/PF4/PGLYRP1/PGLYRP4/PPP3CB/PRDX1/PRF1/PVR/RPS19/SEMG1/SERPINB9/SH2D1A/SLAMF7/SLC22A13/STAT5B/STXBP2/SYK/TU…	75
GO:0003203	BP	GO:0003203	endocardial cushion morphogenesis	21/5894	35/18866	0.000410566	0.00381644	0.00250624	BMP2/BMP5/BMPR1A/DCHS1/ENG/FGF8/HEY2/HEYL/ISL1/MDM2/MDM4/MSX1/NOS3/NOTCH1/RBPJ/ROBO1/SMAD4/SNAI1/SOX9/TBX2/TGFB2	21
GO:0002718	BP	GO:0002718	regulation of cytokine production involved in immune response	41/5894	83/18866	0.000411706	0.00382155	0.0025096	APOA2/BTK/CCR2/CD160/CD226/CD36/CD74/CD96/CUEDC2/DDX1/F2RL1/FFAR2/FOXP3/FZD5/GATA3/GPRC5B/HFE/HLA-E/IFNA2/IFNB1/IL18R1/IL1B/IL1R1/IL6/IRAK3/JAK3/KIR2DL4/MALT1/MAP3K7/MAVS/MIF/NLRP3/PRKCZ/SEMA7A/TBX21/TGFB2/TNF/TRAF6/TRIL/TRPM4/WNT5A	41
GO:0003215	BP	GO:0003215	cardiac right ventricle morphogenesis	14/5894	20/18866	0.000415463	0.00383992	0.00252166	BMPR1A/CHD7/FOXH1/GATA3/GATA4/HAND1/HAND2/HEY2/ISL1/JAG1/NKX2-5/NOTCH1/TGFB2/ZFPM2	14
GO:0071636	BP	GO:0071636	positive regulation of transforming growth factor beta production	14/5894	20/18866	0.000415463	0.00383992	0.00252166	ATF2/ATP6AP2/CD200/CD46/CREB1/CX3CL1/FOXP3/LGALS9/MYB/PTGS2/SERPINB7/SERPINF2/SMAD3/WNT11	14
GO:0098703	BP	GO:0098703	calcium ion import across plasma membrane	14/5894	20/18866	0.000415463	0.00383992	0.00252166	ATP2B4/CACNA2D1/CALCR/FAM155A/FAM155B/FYN/RAMP3/SLC24A1/SLC24A2/SLC8A1/TRPM2/TRPV4/TRPV5/TRPV6	14
GO:0045187	BP	GO:0045187	regulation of circadian sleep/wake cycle	sleep	13/5894	18/18866	0.000418352	0.00386111	0.00253558	ADORA1/ADRB1/CHRNB2/CRH/CSF2/DRD2/DRD3/GHRH/GHRHR/KCNA2/MTNR1B/NPY2R/PER3	13
GO:0046928	BP	GO:0046928	regulation of neurotransmitter secretion	50/5894	106/18866	0.000419097	0.00386249	0.00253648	ADCY1/ADRA1A/APBA1/APBA2/ASIC1/ATP2A2/BACE1/BAIAP3/CACNA1D/CAMK2A/CHRM2/CHRNA3/CHRNA6/CHRNB2/CHRNB3/CHRNB4/CPLX2/CPLX3/CSPG5/DNM1L/DRD1/DRD2/GRIK5/HTR1B/HTR2A/KCNC4/KCNMB4/MCTP1/NCS1/NF1/P2RY1/P2RY4/PPFIA2/PREPL/PRKCG/RAB3A/RAB3GAP1/RHOT1/RIMS3/SLC30A1/SLC4A8/STXBP1/STXBP5L/SYN1/SYP/SYT1/SYT11/SYT12/UNC13A/WNT7A	50
GO:0001890	BP	GO:0001890	placenta development	69/5894	156/18866	0.000419727	0.0038628	0.00253669	ADAM19/ADM/ARID1A/ARNT/ASCL2/ASH1L/BMP5/BMPR2/CASP8/CCDC134/CDKN1B/CDX2/CEBPA/CITED1/CSF2/CTSV/CUL7/DCN/DNAJB6/E2F8/EGLN1/EPAS1/EPOR/ETNK2/FGFR2/FOSL1/FZD5/GCM1/GHSR/GJA1/GJB3/GRB2/GRHL2/HAND1/HES1/HEY2/HS6ST1/HSD17B2/ITGB8/KRT19/LEP/LHX3/LIF/MAPK1/MC2R/MDFI/NDP/OVOL2/PDGFB/PHLDA2/PKD2/PLG/PPARD/PPARG/PTGS2/RBPJ/RXRA/SNAI1/SOD1/SOX15/SP3/SPINT2/STK4/TFEB/TMED2/TTPA/VASH2/VDR/ZFP36L1	69
GO:0042180	BP	GO:0042180	cellular ketone metabolic process	107/5894	260/18866	0.000428092	0.00393419	0.00258357	ABCB11/ABCD1/ABCD2/ACADL/ADIPOQ/ADM/AFP/AKR1B10/AKR1C4/AKT2/ALDH8A1/APOA4/APOC3/APPL2/ATP2B4/AVP/AVPR1A/BMP2/BMP5/BMP6/CAV1/CD74/CLN3/COMT/COQ10B/COQ2/COQ3/COQ6/COQ7/CPT1A/CYP11B1/CYP11B2/CYP17A1/CYP19A1/CYP2B6/CYP46A1/CYP4F2/CYP4F3/CYP7A1/DGKQ/DKKL1/EIF6/ERLIN2/FABP1/FABP3/FABP5/FDXR/FGFR4/FSHB/GHSR/GIP/GPD1/GPD2/GSTZ1/H6PD/HAGH/HSD17B3/IL1B/INS/INSIG1/IRS2/KDSR/MID1IP1/MLXIPL/MTOR/NCOR2/NDUFA9/…	107
GO:0051098	BP	GO:0051098	regulation of binding	145/5894	367/18866	0.000428839	0.00393548	0.00258442	ABL1/ACE/ACTB/ADAM15/ADD2/ADIPOQ/ADNP/ADRB2/AGER/ANGPT1/ARHGAP28/ARHGEF7/ATP2A2/BAG2/BDNF/BMP2/BMP4/BTAF1/BTBD1/CAV1/CCL23/CCPG1/CDC42/CDK9/CDKN1A/CDON/CEBPG/CFHR2/CFHR5/CLIC2/CLN5/CRK/CSF3/CSNK1A1/CSNK1E/CSNK2B/CTBP2/CTNNB1/CYLD/DISC1/DKK1/DNAJB2/DOT1L/EBF2/EGF/EIF3D/EP300/EPB41L5/EPHA4/ERCC2/ERCC4/FOXC1/GATA1/GATA3/GCG/GZMA/HAND1/HAND2/HDAC2/HDAC4/HES1/HEY2/HFE/HIP1R/HMBOX1/ID1/ID2/IDE/IFNG/IRF…	145
GO:0015908	BP	GO:0015908	fatty acid transport	48/5894	101/18866	0.000437121	0.00400581	0.0026306	ABCC2/ABCD1/ABCD2/ABCD4/ACE/ACSL1/AGTR2/AKT2/AVPR1B/CD36/CPT1A/CYP4A11/CYP4F2/DRD2/DRD3/DRD4/EDN1/FABP1/FABP3/FABP4/FABP5/IL1B/IRS2/LEP/MAP2K6/MID1IP1/MIF/NOS2/NTSR1/OXT/P2RX7/PLA2G2A/PLA2G2D/PLA2G2E/PLA2G2F/PLA2G3/PLA2G4A/PLA2G6/PLA2R1/PPARA/PPARD/PPARG/PRKAG2/RPS6KB1/SLC27A2/SSTR4/SYK/TNFSF11	48
GO:0031331	BP	GO:0031331	positive regulation of cellular catabolic process	153/5894	390/18866	0.000440792	0.00403375	0.00264895	AADAC/ABCA2/ABCD1/ABCD2/ADAM9/ADRA2A/ADRB2/AKT2/AMBRA1/APOA4/ARIH1/ARIH2/ARNT/ATG5/ATG7/ATM/ATXN3/BAD/BAG2/BAG3/BAG6/BBS7/BNIP3L/CAV1/CAV3/CBFA2T3/CCDC22/CEBPA/CHFR/CLEC16A/CNOT7/CPT1A/CSNK1A1/CSNK1D/CSNK1E/DAPK1/DCN/DDA1/DET1/DISC1/DNAJB2/DND1/DXO/EDEM1/EGF/ENDOG/ESRRB/FABP1/FAF1/FBXO22/FOXO1/FZR1/GAPDHS/GPD1/GPLD1/GRSF1/GSK3A/GTPBP1/HDAC6/HNRNPD/HTR2A/HUWE1/IFNG/IL1B/IL4/IL6/INS/INSR/IRS2/KAT5/…	153
GO:0042129	BP	GO:0042129	regulation of T cell proliferation	73/5894	167/18866	0.000444701	0.00406105	0.00266688	AGER/AIF1/BMP4/BTN2A2/CASP3/CCL5/CCR2/CD1D/CD209/CD28/CD3E/CD40LG/CD46/CD6/CD70/CRTAM/CTNNB1/DLG1/DLG5/EBI3/EPO/FOXJ1/FOXP3/GLMN/GNRH1/HES1/HHLA2/HLA-DMB/HLA-DPA1/HLA-DPB1/HLA-E/IGFBP2/IL12B/IL12RB1/IL15/IL1B/IL21/IL23A/IL4/IL6/JAK3/LEP/LGALS9/LMO1/LRRC32/NCK1/NCKAP1L/NDFIP1/PDCD1LG2/PLA2G2D/PLA2G2F/PNP/PRKCQ/PTPN22/PYCARD/RC3H1/SCGB1A1/SCRIB/SDC4/SFTPD/SHH/SOS1/SPN/SPTA1/STAT5B/SYK/TNFRSF21/TNFS…	73
GO:0030004	BP	GO:0030004	cellular monovalent inorganic cation homeostasis	53/5894	114/18866	0.000445508	0.00406105	0.00266688	AGT/AGTR2/ATP12A/ATP1A1/ATP6AP1/ATP6AP2/ATP6V0A1/ATP6V0A2/ATP6V0D1/ATP6V0E2/ATP6V1A/ATP6V1B1/ATP6V1B2/ATP6V1E1/ATP6V1G1/ATP6V1H/AVP/AVPR1A/BCL2/CA2/CA7/CLN3/CLN5/CLN6/FASLG/KCNJ2/MAFG/MAPK1/NEDD4L/NOX1/RAB38/RAB7A/SLC12A2/SLC26A3/SLC4A1/SLC4A10/SLC4A3/SLC4A5/SLC4A7/SLC4A8/SLC8A1/SLC9A2/SLC9A3/SLC9A5/SLC9A6/SLC9A7/SLC9A8/TM9SF4/TMEM165/TMPRSS3/TTPA/UBE3A/VPS33A	53
GO:0032368	BP	GO:0032368	regulation of lipid transport	61/5894	135/18866	0.000447152	0.00406105	0.00266688	ABCA2/ABCA7/ABCB11/ABCB4/ADIPOQ/AGT/AGTR2/AKT2/APOA2/APOA4/APOC3/ATP8A2/AVPR1B/BMP6/C1QTNF1/CAV1/CETP/CRH/CRHR1/CYP19A1/CYP4A11/CYP4F2/EDN1/EGF/FABP3/GAL/GALR1/GDF9/GPS2/IL1B/IRS2/ITGB3/KDM5B/LEP/LPCAT3/LRP1/MAP2K6/MIF/MYB/NFKB1/NR1H2/NTSR1/OXT/P2RX7/PLA2G6/PLA2R1/POMC/PON1/PPARG/PTCH1/PTPN11/REN/RETN/SHH/SREBF2/SSTR4/SYK/TAC1/TMF1/TNFSF11/TRIAP1	61
GO:0048565	BP	GO:0048565	digestive tract development	61/5894	135/18866	0.000447152	0.00406105	0.00266688	ACVR2B/AHI1/ALDH1A2/ALX4/ASCL1/ASS1/BBS7/BCL2/BMP4/CBFA2T2/CCDC40/CDKN1A/CDX2/CPS1/CRKL/CTNNB1/DAB1/DCHS1/DNAAF1/EPB41L5/EPHB3/FGF9/FGFR2/FOXF2/FOXL1/GATA4/HES1/HOXA5/HRH2/ID2/MEGF8/NIPBL/NKX2-2/NKX3-2/NOTCH1/OTC/OVOL2/OXTR/PDX1/PYY/RB1/RET/SALL1/SCT/SFRP5/SHH/SIX2/SMAD2/SMAD3/SMO/SRC/TBX2/TCF7/TGFB2/TNF/VPS52/WNT11/WNT5A/YAP1/YIPF6/ZIC3	61
GO:0031279	BP	GO:0031279	regulation of cyclase activity	27/5894	49/18866	0.000447537	0.00406105	0.00266688	AKAP5/CACNA1C/CACNA1D/CAP1/CCR2/CRHR1/DRD2/DRD3/DRD5/GABBR2/GALR1/GALR2/GNAI2/GPR87/GRM2/GRM3/GUCA1B/GUCA2B/HPCA/LTB4R2/NF1/NOS1/NOS2/NOS3/NPR3/PDZD3/RCVRN	27
GO:0061647	BP	GO:0061647	histone H3-K9 modification	27/5894	49/18866	0.000447537	0.00406105	0.00266688	ARID4B/ASH1L/ATRX/EHMT1/EHMT2/GATA3/JARID2/KDM3A/KDM4C/KDM4D/KMT2A/MECP2/MYB/NAP1L2/PIH1D1/PRDM12/PRDM16/PRDM5/PRDM9/SETD5/SIRT6/SMAD4/SMARCB1/SPHK2/SUV39H2/ZNF304/ZNF451	27
GO:1904591	BP	GO:1904591	positive regulation of protein import	24/5894	42/18866	0.000448527	0.00406435	0.00266904	ARHGEF5/BAG3/CDH1/FLNA/HCLS1/HDAC3/HYAL2/IFNG/IPO5/JUP/LEP/MAPK1/MAVS/PDCD5/PIK3R2/PSEN1/PTGS2/RAN/RBM22/SHH/SMAD3/SMO/TARDBP/TPR	24
GO:0016573	BP	GO:0016573	histone acetylation	70/5894	159/18866	0.000450521	0.00407494	0.002676	ACTL6B/APBB1/ATF2/ATG5/BRD1/BRD7/BRD8/BRPF1/CDY1/CHD5/CREBBP/CTBP1/DPF3/DR1/EID1/EP300/EP400/FOXP3/GATA3/GLYR1/IL1B/ING3/ING4/IRF4/ISL1/JADE3/KANSL3/KAT5/KAT6A/KAT7/KAT8/KMT2A/LIF/MAP3K7/MBD3/MCM3AP/MCRS1/MEAF6/MECP2/MORF4L1/MSL1/MSL3/MYOD1/NAA60/NAP1L2/NCOA3/NOS1/OGT/PHF10/PHF20/PIH1D1/POLE3/RPS6KA4/RPS6KA5/SETD5/SMAD4/SMARCB1/SNCA/SPHK2/SRCAP/TADA3/TAF1/TAF10/TAF12/TAF6L/TAF7/THAP7/ZMPSTE24/ZNF…	70
GO:0002237	BP	GO:0002237	response to molecule of bacterial origin	141/5894	356/18866	0.000451492	0.00407494	0.002676	ABCC2/ABL1/ADAM9/ADAMTS13/ADH5/ADM/ALPL/ANKRD1/ASS1/ATP2A2/BCR/BDKRB1/BMP6/CARD8/CASP1/CASP3/CASP8/CCL2/CCL5/CD36/CD6/CD96/CDC73/CEBPE/CHUK/CITED1/CNP/CNR2/COMT/CPS1/CSF2/CSF2RB/CSF3/CTR9/CX3CL1/CXCL2/CXCL3/CYP1A2/DCN/DEFA4/DEFA5/DEFA6/EDN1/EPO/FASLG/FCGR2B/FGFR2/FMO1/FZD5/GCH1/GFI1/GGT5/GHSR/GJA1/GNRH1/GPR31/GSTP1/HDAC2/HNRNPA0/IFNAR1/IL12B/IL12RB2/IL13/IL1B/IL37/IL6/IRAK3/IRF5/LBP/LGALS9/LTA/LT…	141
GO:0003170	BP	GO:0003170	heart valve development	32/5894	61/18866	0.000451583	0.00407494	0.002676	ADAMTS9/BMP2/BMP4/BMPR1A/BMPR2/DCHS1/ELN/EMILIN1/GATA3/GATA4/GJA5/HEY2/HEYL/JAG1/MDM2/MDM4/MTOR/NFATC1/NOS3/NOTCH1/OLFM1/RB1/RBPJ/ROBO1/ROCK2/SMAD4/SMAD6/SNAI1/SOX9/TGFB2/TNFRSF1A/ZBTB14	32
GO:0051260	BP	GO:0051260	protein homooligomerization	77/5894	178/18866	0.000463664	0.00417814	0.00274377	ADCY8/ALDH1A2/ALDOA/ALOX5AP/APPL2/AQP2/AQP4/ARC/ASIC1/C9/CBY1/CRTC1/CRTC3/CRYZ/CTH/EHD1/EHD4/G3BP2/GLRA3/GNMT/HSD17B10/IKZF4/JMJD6/KCNA1/KCNA10/KCNA2/KCNA3/KCNA4/KCNB2/KCNC1/KCNC2/KCNC3/KCNC4/KCND1/KCNF1/KCNG1/KCNJ2/KCNS1/KCNV1/KCNV2/KCTD13/KCTD15/KCTD17/KCTD2/KCTD5/KCTD9/KIF25/LETM1/MAT1A/MCOLN1/MICU1/MIF/MIP/MPP2/P2RX3/PFKL/PFKP/PKD2/PKD2L1/PRF1/PRMT8/PRND/PYCARD/RYR3/SAMHD1/SHMT1/SIGMAR1/SLC1A…	77
GO:0001656	BP	GO:0001656	metanephros development	44/5894	91/18866	0.000467484	0.00419596	0.00275547	ADIPOQ/AGTR2/APH1A/AQP2/BCL2/BMP4/CITED1/CTNNB1/DLG5/EYA1/FGF8/FOXC2/FOXJ1/FRAS1/GATA3/GDF11/GDNF/GPC3/GREB1L/HES1/ID2/LHX1/LIF/NF1/NIPBL/NPHS2/OSR2/PAX2/PAX8/PDGFB/PKD2/POU3F3/PTCH1/RET/SALL1/SHH/SIX2/SMAD4/SMO/SOX9/UMOD/WNT4/WT1/YAP1	44
GO:0042755	BP	GO:0042755	eating behavior	20/5894	33/18866	0.000467585	0.00419596	0.00275547	AGRP/ATP8A2/CCK/CPT1A/GDF15/GHSR/IAPP/LEP/MTOR/NPY5R/OPRL1/OPRM1/OXT/OXTR/P2RY1/PRLH/STAT3/TCF15/TH/TRH	20
GO:0048011	BP	GO:0048011	neurotrophin TRK receptor signaling pathway	20/5894	33/18866	0.000467585	0.00419596	0.00275547	AGT/AGTR2/BDNF/CASP3/DOK5/FRS2/GRB2/HAP1/NDN/NGF/NGFR/NTF3/NTRK1/PPP2R5B/PTPN11/SLC9A6/SOS1/SPRY2/SRC/WASF1	20
GO:0060326	BP	GO:0060326	cell chemotaxis	125/5894	311/18866	0.000469705	0.00420916	0.00276414	ACKR2/ACKR4/AIF1/AKIRIN1/ALOX5/ARHGEF5/BIN2/BST1/C1QBP/C5/C5AR2/CALCA/CCL1/CCL11/CCL13/CCL16/CCL2/CCL21/CCL23/CCL24/CCL25/CCL27/CCL5/CCR10/CCR2/CCR3/CCR4/CCR6/CCR9/CD74/CNR2/CORO1B/CREB3/CRK/CRKL/CSF1/CSF1R/CSF3R/CX3CL1/CXADR/CXCL2/CXCL3/CXCR1/CYP19A1/CYP7B1/DAPK2/DNM1L/DPEP1/DYSF/EDN1/EPHB1/F2RL1/F7/FFAR2/FGF1/FGF16/FGF18/FGF4/FGFR1/FLT1/GAS6/GBF1/GPR183/GSTP1/HGF/HOXB9/HRG/IL17RA/IL1B/IL23A/IL4…	125
GO:0072171	BP	GO:0072171	mesonephric tubule morphogenesis	34/5894	66/18866	0.000471555	0.0042199	0.00277119	AGT/AGTR2/BCL2/BMP2/BMP4/CITED1/CTNNB1/DCHS1/DLG1/EYA1/FGF1/FGF8/GATA3/GDNF/GPC3/GREB1L/HES1/LHX1/PAX2/PAX8/PKD2/PTCH1/SALL1/SHH/SIX2/SMAD4/SMO/SOX9/WNT1/WNT11/WNT2B/WNT4/WNT6/WT1	34
GO:0032868	BP	GO:0032868	response to insulin	115/5894	283/18866	0.000476857	0.00426146	0.00279848	AANAT/ADIPOQ/ADM/AGRP/AGT/AKT2/APC/APOBEC1/APPL2/APRT/ATP6AP1/ATP6V0A1/ATP6V0A2/ATP6V0D1/ATP6V0E2/ATP6V1A/ATP6V1B1/ATP6V1B2/ATP6V1E1/ATP6V1G1/ATP6V1H/BCAR3/C2CD5/CCND3/CITED1/CSRP3/EIF4EBP1/EIF6/ESRRA/FABP3/FOXC2/FOXO1/FOXO4/FUT7/GAL/GCK/GCNT1/GHRHR/GHSR/GNAI2/GPLD1/GPR21/GPT/GRB14/GRB2/GSK3A/GSTP1/HADH/HDAC9/HSD11B2/IDE/IGFBP1/IL1B/INPP5K/INS/INSIG1/INSR/INSRR/IRS2/IRS4/KHK/KLF15/LEP/MC4R/MSTN/M…	115
GO:0021766	BP	GO:0021766	hippocampus development	40/5894	81/18866	0.000485322	0.00432556	0.00284058	ATAT1/ATP2B4/BBS4/BCAN/CASP3/CDK5R1/CDK5R2/CRK/CRKL/DAB1/DCLK2/DRD1/EIF2B3/EMX2/EPHA5/FEZF2/FGF13/HSD3B1/HSD3B2/HTR5A/KCNA1/KDM6B/KIF5B/LHX5/NEUROD6/NKX2-1/NR2E1/PAFAH1B1/PHLPP2/PROX1/PTEN/PTPRS/RARA/SCT/SMO/SRF/TSC1/UBA6/XRCC1/YWHAE	40
GO:0009755	BP	GO:0009755	hormone-mediated signaling pathway	85/5894	200/18866	0.000485365	0.00432556	0.00284058	ABHD2/ACSL1/AGRP/APPL2/ARID1A/ARNTL/ASIP/BMP4/CNOT2/CRH/CRHBP/CRHR1/CRHR2/CSNK2B/CYP7B1/DDX17/EP300/ESR1/ESR2/ESRRA/ESRRB/FKBP4/FOXA1/FOXH1/FSHB/FSHR/GCGR/GHRHR/GHSR/GTF2H1/HDAC6/HEYL/ISL1/KDM3A/KDM5D/KMT2D/LATS1/LHCGR/LMO3/NCOR2/NEDD4/NR0B1/NR2E1/NR2E3/NR3C1/NR5A1/NR5A2/OR51E2/PADI2/PGR/POU4F2/PPARA/PPARD/PPARG/PPP5C/PRCP/PRLR/PTH/PTPN11/RARA/RBFOX2/REN/RNF6/RWDD1/RXRA/RXRB/RXRG/SMARCA4/SRC/SSTR…	85
GO:0072329	BP	GO:0072329	monocarboxylic acid catabolic process	62/5894	138/18866	0.000486119	0.00432633	0.00284109	ABCB11/ABCD1/ABCD2/ABCD4/ABHD2/ABHD3/ACAD10/ACADL/ACADS/ACAT2/ACOT8/ACOXL/ADIPOQ/ADTRP/AGXT/AKR1D1/AKT2/ALDH5A1/ASRGL1/AUH/CEL/CPT1A/CRABP1/CYP26B1/CYP2W1/CYP4A11/CYP4F2/CYP4F3/DCXR/DECR2/ECH1/ECHDC1/ECI1/ECI2/ETFA/ETFB/FAAH/FABP1/FAH/HADH/HAO1/HAO2/IDUA/ILVBL/IRS2/IVD/LEP/LIPE/LYPLA2/MCAT/MECR/MTOR/NUDT7/PCK1/PECR/PHYH/PON3/PPARA/PPARD/SLC27A2/SORD/XYLB	62
GO:0002367	BP	GO:0002367	cytokine production involved in immune response	49/5894	104/18866	0.000492117	0.0043737	0.00287219	APOA2/BTK/CCR2/CD160/CD226/CD36/CD74/CD96/CUEDC2/DDX1/DLG1/F2RL1/FFAR2/FOXP3/FZD5/GAS6/GATA3/GPRC5B/HFE/HLA-E/IFNA2/IFNB1/IL12B/IL18R1/IL18RAP/IL1B/IL1R1/IL4/IL6/IRAK3/JAK3/KDELR1/KIR2DL4/MALT1/MAP3K7/MAVS/MIF/MR1/NLRP3/PRKCZ/SEMA7A/SPHK2/TBX21/TGFB2/TNF/TRAF6/TRIL/TRPM4/WNT5A	49
GO:0010043	BP	GO:0010043	response to zinc ion	29/5894	54/18866	0.000496077	0.00439683	0.00288739	AANAT/APOBEC1/ASS1/CA2/CPS1/CREB1/CRIP1/GLRA1/GLRA2/KHK/MT1E/MT1F/MT1G/MT1H/MT1HL1/MT1M/MT1X/MT2A/MT3/MT4/OTC/P2RX7/PAM/PTEN/S100A8/SLC30A3/SLC30A4/SLC30A5/TH	29
GO:2000179	BP	GO:2000179	positive regulation of neural precursor cell proliferation	29/5894	54/18866	0.000496077	0.00439683	0.00288739	ASCL1/CDON/CTNNB1/CX3CL1/DCT/DISC1/DRD2/EGF/ELL3/FLNA/FOXG1/FZD3/FZD9/GNAI2/GPR37L1/INSM1/LHX1/LHX5/LRP2/NES/NOTCH1/NR2E1/PAX6/PITX3/PROX1/SHH/SMO/VEGFC/ZNF335	29
GO:0046486	BP	GO:0046486	glycerolipid metabolic process	168/5894	434/18866	0.000502627	0.0044488	0.00292151	AADAC/ABHD2/ABHD3/ABHD4/ABHD6/ABHD8/ACHE/ACSL1/AGAP2/AGPAT1/AGPAT3/AGPAT4/ALOX15/ALPI/APOA2/APOA4/APOBEC1/APOC3/APOH/ARF3/ATG14/ATM/BPNT1/C3/CAV1/CAV3/CDIPT/CDS2/CEPT1/CETP/CHAT/CHKA/CHRM5/CISH/CLN3/CPNE6/CPNE7/CPS1/CPT1A/CSF1R/CSNK2B/CTDNEP1/DDHD2/DGKE/DGKG/DGKH/DGKQ/DPM3/EFR3B/ENPP2/ETNK1/ETNK2/FAAH/FABP1/FABP2/FABP3/FABP4/FABP5/FABP6/FABP7/GAL3ST1/GALR2/GDE1/GK/GK2/GNB3/GPD1/GPLD1/GPX1/HTR2A/H…	168
GO:0006473	BP	GO:0006473	protein acetylation	86/5894	203/18866	0.000510239	0.00451001	0.00296171	AANAT/ACTL6B/APBB1/ARNTL/ATAT1/ATF2/ATG5/BAG6/BRD1/BRD7/BRD8/BRPF1/CDY1/CHD5/CREBBP/CTBP1/DDX3X/DPF3/DR1/EID1/EP300/EP400/FOXO1/FOXP3/GATA3/GLYR1/HDAC2/IL1B/ING3/ING4/IRF4/ISL1/JADE3/KANSL3/KAT5/KAT6A/KAT7/KAT8/KLF15/KMT2A/LIF/MAP3K7/MBD3/MCM3AP/MCRS1/MEAF6/MECP2/MORF4L1/MSL1/MSL3/MYOD1/NAA11/NAA15/NAA16/NAA35/NAA60/NAP1L2/NAT8B/NCOA3/NOS1/NUPR1/OGT/PHF10/PHF20/PIH1D1/POLE3/PRKAA1/RPS6KA4/RPS6KA5…	86
GO:0006006	BP	GO:0006006	glucose metabolic process	90/5894	214/18866	0.000512448	0.00452337	0.00297048	ADIPOQ/AKT2/ALDOA/ALDOC/ARPP19/ATF4/BAD/BPGM/BRS3/C1QTNF1/C1QTNF3/COX11/CPT1A/CREM/DCXR/DGKQ/DLAT/DYRK2/ENO3/EP300/ESRRB/FABP5/FOXO1/G6PC2/G6PC3/GAPDH/GAPDHS/GCG/GCGR/GCK/GNB3/GNMT/GPD1/GPD2/GPI/GPLD1/GPT/GSK3A/H6PD/INPP5K/INS/INSR/IRS2/KHK/LCMT1/LEP/MDH1/MDH2/MST1/MTOR/OAS1/OGT/ONECUT1/PASK/PCK1/PDHA1/PDHA2/PDK3/PDX1/PFKFB1/PFKL/PFKP/PGAM1/PGK1/PGK2/PGP/PHLDA2/PKLR/POMC/PPARA/PPARD/PPP1R3A/PPP1R…	90
GO:0007416	BP	GO:0007416	synapse assembly	79/5894	184/18866	0.000520437	0.00458763	0.00301268	ACHE/ADD2/ADNP/BDNF/BSN/CBLN1/CDH1/CDH2/CDH9/CEL/CHRNB2/CLSTN2/CLSTN3/CNTN5/COLQ/CRKL/CUX2/DKK1/DLG5/DNM3/DRD1/DRD2/DSCAM/EFNB2/EPHA7/EPHB1/EPHB3/ERBB4/FGF13/FLRT3/FZD5/GABRA1/GABRA2/GABRB2/GABRB3/GABRG2/GAP43/GHSR/GPC4/GPM6A/GRIN1/IL1RAPL2/LGI2/LRFN3/LRP4/LRRTM2/LRTM1/MAGI2/MECP2/MUSK/NLGN3/NLGN4X/NLGN4Y/NPTN/NRXN2/NTN1/NTRK1/OBSL1/OXT/OXTR/PCDHB3/PCDHB6/PCLO/PLXNB2/PTEN/PTPRD/PTPRS/SDK2/SEMA4A/…	79
GO:0046822	BP	GO:0046822	regulation of nucleocytoplasmic transport	52/5894	112/18866	0.000522142	0.00459641	0.00301845	AAAS/AGTR2/AKAP8L/ANGPT1/BAG3/BARD1/BMP4/CABP1/CD36/CDH1/EMD/FLNA/GAS6/HCLS1/HDAC3/HYAL2/IFNG/IL1B/IPO5/JUP/LEP/MAPK1/MAVS/MDM2/NEDD4/NF1/NRDE2/NUP214/NUP54/PIK3R2/PPM1A/PPP1CC/PRKACA/PSEN1/PTGS2/PTPN11/RAB23/RAN/RBM22/RBM26/RIOK2/SFN/SHH/SMAD3/SMO/SUPT6H/TARDBP/TCF7L2/TP53/TPR/UFM1/YWHAE	52
GO:0120163	BP	GO:0120163	negative regulation of cold-induced thermogenesis	26/5894	47/18866	0.000523714	0.00459776	0.00301933	ABHD6/ACVR2B/ADIPOQ/ALDH1A1/ARNTL/ATF4/FOXC2/ID1/IL15/IL18R1/LAMA4/LNPEP/MAP2K6/NOTCH1/NOVA2/NPR3/NR1H2/PCTP/PLCL1/PLCL2/RB1/RBPJ/STK11/TFE3/TLE3/WNT10B	26
GO:1903115	BP	GO:1903115	regulation of actin filament-based movement	26/5894	47/18866	0.000523714	0.00459776	0.00301933	ADORA1/ATP1A1/ATP2A1/ATP2A2/BIN1/CACNA1C/CAV1/CAV3/CTNNA3/DLG1/DSP/FGF13/FLNA/GATA4/GJA5/HCN4/JUP/KCNJ2/MYBPC3/PDE4B/PDE4D/PKP2/RANGRF/SCN5A/TNNC1/TRPM4	26
GO:0014072	BP	GO:0014072	response to isoquinoline alkaloid	19/5894	31/18866	0.000530204	0.00463235	0.00304205	ADCY8/AIF1/ATG7/DRD2/DRD3/GRIN1/MDM2/MTOR/NPFF/OPRM1/PENK/PITX3/PPP5C/PRKCE/PRKCG/RELA/RGS4/TAC1/TACR3	19
GO:0043278	BP	GO:0043278	response to morphine	19/5894	31/18866	0.000530204	0.00463235	0.00304205	ADCY8/AIF1/ATG7/DRD2/DRD3/GRIN1/MDM2/MTOR/NPFF/OPRM1/PENK/PITX3/PPP5C/PRKCE/PRKCG/RELA/RGS4/TAC1/TACR3	19
GO:0060261	BP	GO:0060261	positive regulation of transcription initiation from RNA polymerase II promoter	19/5894	31/18866	0.000530204	0.00463235	0.00304205	CREB1/ERCC1/ERCC6/ESR1/HNF1A/MED12/MED13/MED14/MED24/MED4/NKX2-5/PSMC3/PSMC4/PSMC5/PSMC6/SRF/SUB1/TP53/WNT10B	19
GO:0001658	BP	GO:0001658	branching involved in ureteric bud morphogenesis	31/5894	59/18866	0.000531945	0.00463235	0.00304205	AGT/AGTR2/BCL2/BMP2/BMP4/CITED1/CTNNB1/DCHS1/DLG1/EYA1/FGF1/FGF8/GDNF/GPC3/GREB1L/LHX1/PAX2/PAX8/PKD2/PTCH1/SALL1/SHH/SIX2/SMAD4/SMO/SOX9/WNT1/WNT2B/WNT4/WNT6/WT1	31
GO:0042306	BP	GO:0042306	regulation of protein import into nucleus	31/5894	59/18866	0.000531945	0.00463235	0.00304205	AGTR2/ANGPT1/BAG3/BMP4/CABP1/CD36/CDH1/FLNA/HCLS1/HDAC3/HYAL2/IFNG/IPO5/JUP/LEP/MAPK1/MAVS/NF1/NUP54/PIK3R2/PSEN1/PTGS2/RAB23/RAN/RBM22/SHH/SMAD3/SMO/TARDBP/TPR/UFM1	31
GO:0043525	BP	GO:0043525	positive regulation of neuron apoptotic process	31/5894	59/18866	0.000531945	0.00463235	0.00304205	ASCL1/ATF2/ATF4/ATM/BACE1/CASP3/CDC34/CDC42/CDK5R1/CTNNB1/EPHA7/FASLG/GRIK2/GRIK5/GSK3A/HDAC4/ITGA1/MYB/NF1/NQO1/NQO2/NUPR1/PAK3/PIN1/PITX3/RAPSN/TFAP2A/TGFB2/TNF/TP53/UBE2M	31
GO:1905954	BP	GO:1905954	positive regulation of lipid localization	45/5894	94/18866	0.000533462	0.00463933	0.00304663	ABCA7/ABCB11/ABCB4/ADIPOQ/ASXL2/ATP8A2/AVPR1B/BMP6/C1QTNF1/C3/CAV1/CD36/CETP/CRH/CYP19A1/CYP4A11/CYP4F2/EDN1/EHD1/FABP3/GAL/GALR1/GPS2/IL1B/LPCAT3/LRP1/MAP2K6/MIF/MYB/NFKB1/NR1H2/NTSR1/OXT/P2RX7/PLA2G6/PLA2R1/PON1/PTCH1/RETN/SREBF2/SSTR4/TAC1/TMF1/TNFSF11/TRIAP1	45
GO:0051146	BP	GO:0051146	striated muscle cell differentiation	119/5894	295/18866	0.000537651	0.0046695	0.00306644	ACTA1/ACTN2/ADRA1A/AFG3L2/AGT/AGTR2/ALPK3/ANKRD1/ANKRD2/ARID1A/ATG5/AVPR1A/BCL2/BCL9/BDNF/BIN3/BMP10/BMP2/BMP4/CAPN3/CASP3/CASQ1/CAV3/CBY1/CD9/CDH2/CDON/CHRNB1/CHUK/COMP/CSRP3/CTDP1/CXADR/CYP26B1/DKK1/DYRK1B/DYSF/EDN1/EFNB2/EHD1/EHD2/FBXO22/FHOD3/FLT3LG/FRS2/FZD7/GATA4/GDF15/GPX1/GSK3A/HDAC4/HDAC9/HEY2/IGFBP5/IL4/IL4R/KCNH1/KDM6B/KEL/KRAS/KRT19/MAML1/MSX1/MTOR/MYEF2/MYF5/MYF6/MYH3/MYH6/MYL2/MYLK3…	119
GO:0060538	BP	GO:0060538	skeletal muscle organ development	73/5894	168/18866	0.000548699	0.00475906	0.00312526	ACTA1/AKIRIN1/ANKRD1/ANKRD2/ARNTL/ASS1/BCL2/BCL9/BIN3/CASQ1/CAV1/CCNT2/CDON/CHRNA1/CHRND/CNTFR/COL19A1/COPS2/CSRP3/CTNNB1/CYP26B1/DAG1/DCN/DDX17/EEF2/ELN/EMD/EP300/EPHB1/FBXO22/FOXN2/GPC1/GPX1/GTF3C5/HDAC4/HDAC9/HEYL/HIVEP3/KEL/MEF2D/MSTN/MTM1/MYF5/MYF6/MYH15/MYLPF/MYOD1/MYOG/MYOM2/MYOZ2/NEURL1/NF1/NOTCH1/NPHS1/NUPR1/PAX7/PHOX2B/POPDC2/PPP3CA/PRKAA1/RB1/SAP30/SHH/SKI/SMO/SRPK3/TBX1/TLL2/USP19/WNT…	73
GO:0043506	BP	GO:0043506	regulation of JUN kinase activity	43/5894	89/18866	0.000550425	0.00476128	0.00312672	AGER/AIDA/ARHGEF5/BIRC7/CD40LG/DKK1/EDN1/EPHA4/ERCC6/ERN1/ERN2/FGD2/FZD10/FZD5/GSTP1/HIPK3/MAP2K7/MAP3K10/MAP3K12/MAP3K13/MAP3K2/MAP3K5/MAP3K6/MAP3K7/MAP4K5/MAPK8IP3/NPPA/PKN1/PPEF2/PTK2B/PTPN1/PTPN22/ROR2/SPAG9/SYK/TAOK1/TLR6/TNF/TNFSF11/TNIK/TRAF6/WNT5A/ZNF675	43
GO:0061053	BP	GO:0061053	somite development	43/5894	89/18866	0.000550425	0.00476128	0.00312672	ALDH1A2/ATM/BMPR1A/CDX1/CDX2/DKK1/DLL3/EP300/EPB41L5/FOXB1/FOXC1/FOXC2/FRZB/GDF3/LFNG/LHX1/LRP6/MED12/MEOX1/MYF5/MYF6/NOTCH1/PCDH8/PSEN1/PTCH1/RBBP6/RBPJ/ROR2/SHH/SMAD3/SMAD4/SMO/TBX19/TCAP/TCF15/TMED2/TP53/WDR19/WNT1/WNT11/WNT4/WNT5A/XRCC2	43
GO:0043087	BP	GO:0043087	regulation of GTPase activity	184/5894	481/18866	0.000556392	0.00480649	0.0031564	ACAP2/ADAP1/ADCYAP1/ADPRH/ADRB1/AGAP1/AGAP2/AGFG1/AKT2/ALDH1A1/AMOT/ANKRD27/APC2/ARFGAP2/ARHGAP12/ARHGAP22/ARHGAP24/ARHGAP26/ARHGAP28/ARHGAP29/ARHGAP33/ARHGAP35/ARHGAP4/ARHGDIA/ARHGDIB/ARHGDIG/ARHGEF10/ARHGEF11/ARHGEF12/ARHGEF15/ARHGEF5/ARHGEF7/ARL2/BBS4/BCAR3/BCAS3/BCR/BNIP2/CCL1/CCL11/CCL13/CCL16/CCL2/CCL21/CCL23/CCL24/CCL25/CCL5/CDC42EP2/CDC42SE1/CDKL5/CHM/CRK/CRKL/CX3CL1/DEPDC5/DNM1L/DOCK1/DO…	184
GO:0045017	BP	GO:0045017	glycerolipid biosynthetic process	110/5894	270/18866	0.000558701	0.00482	0.00316528	ABHD3/ABHD4/ABHD8/ACHE/ACSL1/AGAP2/AGPAT1/AGPAT3/AGPAT4/ALOX15/ALPI/APOA2/ARF3/ATM/C3/CDIPT/CDS2/CEPT1/CHAT/CHKA/CLN3/CPNE6/CPNE7/CSNK2B/CTDNEP1/DDHD2/DGKE/DGKG/DGKH/DGKQ/DPM3/ETNK1/ETNK2/FABP3/FABP5/GK/GPD1/GPLD1/HTR2A/HTR2B/HTR2C/IMPA1/INPP4B/INPP5J/INPP5K/LCAT/LDLR/LPCAT3/LPCAT4/MBOAT7/MOGAT2/MPPE1/MTM1/MTMR1/MTMR12/MTMR6/MTMR7/MTMR9/NR1H2/NR1H4/OCRL/PCK1/PCTP/PCYT1B/PCYT2/PDGFB/PEMT/PGAP2/PI4…	110
GO:0007163	BP	GO:0007163	establishment or maintenance of cell polarity	92/5894	220/18866	0.000560144	0.00482436	0.00316814	ACTB/ACTR2/ACTR3/AMOT/ANK1/ARHGAP35/ARHGEF11/ARHGEF2/BCAS3/BRSK2/CAP1/CCL21/CD3G/CDC42/CDC42BPB/CDH5/CDK5RAP2/CDX2/CLASP1/CRB1/CRK/CRKL/CRTAM/CYP26B1/CYTH3/DCTN1/DLG1/DLG5/DOCK2/EPHB1/FAM89B/FGF13/FLOT2/FOXJ1/FSCN2/FSCN3/GATA3/GBF1/GJA1/GOLPH3/HES1/KIAA1614/KIF25/LAMA1/LIN7A/LIN7C/LLGL1/MAP2/MAP4/MAP7/MAPKAP1/MCPH1/MYO9A/NCKAP1L/NDEL1/NEK3/NSFL1C/NUMA1/OPHN1/PAFAH1B1/PARD6A/PARD6B/PAX6/PDLIM1/PRK…	92
GO:0051656	BP	GO:0051656	establishment of organelle localization	167/5894	432/18866	0.000560695	0.00482436	0.00316814	ACTN4/ACTR10/ACTR2/ACTR3/ANKRD28/ANKRD53/AP1AR/AP1M2/AP3B2/AP3D1/ARFGAP2/ARHGEF2/ASIP/ATM/ATP6AP1/BBS4/BBS7/BECN1/BICD2/BTK/CBL/CDC42/CDK5RAP2/CENPC/CHMP1B/CHMP6/CHMP7/CLASP1/CLMN/CLN3/CNIH3/CPLX2/CROCC/CSNK1D/CTNNB1/DCTN1/DLG1/DNM2/DNM3/EIF6/F5/F8/FES/FGR/FNBP1L/GBF1/GJA1/GOSR1/GOSR2/GPR143/GRIA1/HAP1/IL13/IL4/IL4R/INCENP/KIF13A/KIF1A/KIF25/KIF3A/KIF3C/KIF5A/KIF5B/KLHL12/LAMP1/LAT/LAT2/LGALS9/LI…	167
GO:0050671	BP	GO:0050671	positive regulation of lymphocyte proliferation	61/5894	136/18866	0.000566431	0.0048608	0.00319207	AGER/AIF1/BCL2/BST1/CCL5/CCR2/CD1D/CD209/CD28/CD3E/CD40LG/CD46/CD6/CD70/CD74/CDKN1A/CHRNB2/EBI3/EPO/FLT3LG/FOXP3/GPR183/HES1/HHLA2/HLA-DMB/HLA-DPA1/HLA-DPB1/HLA-E/IGFBP2/IL12B/IL12RB1/IL13/IL15/IL1B/IL21/IL23A/IL4/IL5/IL6/IRS2/JAK3/LEP/LGALS9/MIF/NCK1/NCKAP1L/PDCD1LG2/PNP/PRKCQ/PTPN22/PYCARD/SHH/SPTA1/STAT5B/SYK/TAC1/TNFRSF4/TNFSF9/TRAF6/VTCN1/ZNF335	61
GO:0071331	BP	GO:0071331	cellular response to hexose stimulus	61/5894	136/18866	0.000566431	0.0048608	0.00319207	AACS/ADCY8/ADRA2A/AGER/BAD/BAIAP3/BRSK2/CASR/CDK16/CPB2/CRH/CYP7A1/ENDOG/EPHA5/ERN1/FKBP1B/GAS6/GATA4/GCG/GHRHR/GPLD1/GPR27/GPR68/GRIK5/HMGN3/IRS2/KIF5B/LIN28A/LRP1/MLXIPL/MPC2/NADK/NR1H4/PAX2/PCK1/PDK3/PDX1/PIH1D1/PLA2G6/POLG/PPP3CA/PPP3CB/PRKAA1/PRKACA/PRKCE/RAB11B/RAB11FIP5/RAC1/SIDT2/SLC29A1/SLC2A5/SMARCA4/SMARCB1/SRF/STAR/STX4/SYBU/TH/TRPM4/VSNL1/ZNF236	61
GO:0050921	BP	GO:0050921	positive regulation of chemotaxis	64/5894	144/18866	0.000568593	0.0048729	0.00320002	AGER/AIF1/AKIRIN1/BMPR2/C1QBP/CASR/CCL1/CCL21/CCL27/CCL5/CCR2/CCR4/CCR6/CD74/CREB3/CSF1/CSF1R/DAPK2/DNM1L/DSCAM/DYSF/EDN1/F2RL1/F3/F7/FGF16/FGF18/FGFR1/GAS6/IL23A/IL4/IL6/IL6R/ITGA2/KDR/LBP/LGALS9/LGMN/MAPK1/MEGF8/MSTN/NCKAP1L/NTF3/PDGFB/PDGFD/PPM1F/PRKD1/PRKD2/PTK2B/RAC1/S100A7/SCG2/SMAD3/STX3/STX4/SWAP70/THBS4/TMSB4X/TNFSF14/TRPV4/TUBB2B/VEGFC/WNT5A/ZNF580	64
GO:0042698	BP	GO:0042698	ovulation cycle	35/5894	69/18866	0.000569856	0.00487727	0.00320289	ADNP/AFP/BMPR1B/CASP3/ESR1/ETS1/FSHB/FSHR/GABRB1/GDF9/GNRH1/HAS1/KISS1/LEP/LHCGR/MAP2K6/MSTN/NCOR2/NOS3/NPY5R/NR5A1/NRIP1/OPRL1/OPRM1/OXTR/PAM/PGR/PLEKHA1/PTX3/RETN/SGPL1/SRC/STAT5B/TGFB2/TIMP4	35
GO:0060840	BP	GO:0060840	artery development	48/5894	102/18866	0.000577898	0.00493958	0.0032438	ACVR2B/ADAMTS6/ADAMTS9/ANGPTL3/BMP4/BMPR1A/BMPR2/CHD7/COMP/DCTN5/DNM2/EFNB2/ENG/EYA1/FGF8/FOXC1/FOXC2/FOXH1/GJA5/HAND2/HES1/HEY2/HOXA1/JAG1/LDLR/LEP/LRP1/LRP2/LTBP1/LUZP1/NF1/NGFR/NOTCH1/NOTCH3/PKD2/PROX1/RBPJ/ROBO1/SHH/SLC2A10/SMAD6/SNX17/SRF/TAB1/TBX1/TBX2/TGFB2/WNT11	48
GO:0000186	BP	GO:0000186	activation of MAPKK activity	28/5894	52/18866	0.000583053	0.00497707	0.00326843	ADAM9/ADORA1/BMP4/CARTPT/CRK/CRKL/EGF/ERCC6/FRS2/GRM1/KIDINS220/LAMTOR2/MAP3K10/MAP3K12/MAP3K13/MAP3K14/MAP3K2/MAP3K5/MAP3K6/MAP3K7/MAP3K8/MAPK1/NGF/NTRK1/PSEN1/RAPGEF1/TAOK2/TNIK	28
GO:0002699	BP	GO:0002699	positive regulation of immune effector process	93/5894	223/18866	0.000584541	0.00498321	0.00327246	ANKRD17/AP1G1/APPL2/BTK/C3/CCR2/CD160/CD177/CD1B/CD1D/CD226/CD28/CD36/CD46/CD74/CRTAM/DDX1/DHX58/F2RL1/FES/FFAR2/FGR/FOXP3/FZD5/GATA3/GPI/GPRC5B/HLA-DMB/HLA-E/HPX/IFNG/IL12B/IL12RB1/IL13/IL18R1/IL18RAP/IL1B/IL1R1/IL21/IL23A/IL4/IL4R/IL5/IL6/KIR2DL4/KLK5/LAG3/LAMP1/LBP/LGALS9/LTA/MALT1/MAP3K7/MAVS/MIF/MLH1/MR1/MYB/NCR3/NLRP3/NOS2/NPPA/P2RX7/PCK1/PLA2G3/PRKCZ/PTAFR/PTPN22/PTPRJ/PUM2/PVR/RAPGEF1/RAR…	93
GO:0031214	BP	GO:0031214	biomineral tissue development	71/5894	163/18866	0.000596344	0.00506472	0.00332599	ACVR2B/ADRB2/ALOX15/ALOX5/ALPL/AMBN/AMELX/AMELY/ANKH/ASGR2/ATF4/BMP2/BMP2K/BMP4/BMP6/BMPR1A/BMPR1B/BMPR2/CEMP1/CER1/COMP/DMP1/EIF2AK3/ERCC2/FBXL15/FGFR2/FGFR3/FGR/FOXO1/FZD9/GAS6/GATA1/GPC3/HEY2/HTN1/HTN3/IBSP/LEP/LTBP3/LTF/MATN1/MEPE/MGP/MMP20/NELL1/NOS3/NOTCH1/ODAM/OSR2/P2RX7/PHEX/PPARA/PTGS2/PTH/PTK2B/ROCK2/ROR2/SBNO2/SLC8A1/SMAD3/SOX9/SRGN/TBX1/TFAP2A/TRPM4/WNT10B/WNT11/WNT4/WNT6/ZBTB40/ZMPST…	71
GO:0110148	BP	GO:0110148	biomineralization	71/5894	163/18866	0.000596344	0.00506472	0.00332599	ACVR2B/ADRB2/ALOX15/ALOX5/ALPL/AMBN/AMELX/AMELY/ANKH/ASGR2/ATF4/BMP2/BMP2K/BMP4/BMP6/BMPR1A/BMPR1B/BMPR2/CEMP1/CER1/COMP/DMP1/EIF2AK3/ERCC2/FBXL15/FGFR2/FGFR3/FGR/FOXO1/FZD9/GAS6/GATA1/GPC3/HEY2/HTN1/HTN3/IBSP/LEP/LTBP3/LTF/MATN1/MEPE/MGP/MMP20/NELL1/NOS3/NOTCH1/ODAM/OSR2/P2RX7/PHEX/PPARA/PTGS2/PTH/PTK2B/ROCK2/ROR2/SBNO2/SLC8A1/SMAD3/SOX9/SRGN/TBX1/TFAP2A/TRPM4/WNT10B/WNT11/WNT4/WNT6/ZBTB40/ZMPST…	71
GO:0019835	BP	GO:0019835	cytolysis	18/5894	29/18866	0.000598011	0.00506472	0.00332599	C5/C8A/C8B/C8G/C9/CFHR2/CFHR5/F2/GZMA/GZMH/HRG/KRT6A/LBP/LYZ/LYZL6/MICA/PLA2G2A/PRF1	18
GO:0050820	BP	GO:0050820	positive regulation of coagulation	18/5894	29/18866	0.000598011	0.00506472	0.00332599	APOH/CD36/CPB2/DMTN/ENPP4/F12/F2/F3/F7/HRG/NFE2L2/PLA2G4A/PLG/PRDX2/PSEN1/SELP/SERPINF2/THBD	18
GO:0070076	BP	GO:0070076	histone lysine demethylation	18/5894	29/18866	0.000598011	0.00506472	0.00332599	HR/HSF4/JARID2/KDM2A/KDM3A/KDM3B/KDM4C/KDM4D/KDM5A/KDM5B/KDM5C/KDM5D/KDM6B/KDM7A/KDM8/PHF2/PHF8/UTY	18
GO:0007223	BP	GO:0007223	Wnt signaling pathway	calcium modulating pathway	22/5894	38/18866	0.000602536	0.00508974	0.00334242	AGO3/CAMK2A/CTNNB1/DKK1/FZD3/FZD5/GNAT2/MAP3K7/NFATC1/PDE6B/PDE6G/PLCB1/PLCB2/PLCB3/PPP3CA/PPP3CB/PPP3R1/ROR2/TCF7L2/TNRC6B/WNT11/WNT5A	22
GO:0051930	BP	GO:0051930	regulation of sensory perception of pain	22/5894	38/18866	0.000602536	0.00508974	0.00334242	ADORA1/ADRA2C/CCK/COMT/EDN1/FABP5/GRIN2D/GRM1/MTOR/NPFF/NPY2R/NTSR1/OPRL1/OPRM1/OXT/P2RX3/PTAFR/SCN11A/SMR3A/SMR3B/VIP/ZFHX2	22
GO:0050764	BP	GO:0050764	regulation of phagocytosis	46/5894	97/18866	0.000603904	0.00509465	0.00334564	ABCA7/ADIPOQ/ALOX15/APOA2/APPL2/ATG5/BCR/C3/C4BPA/C4BPB/CCL2/CD36/CD47/CLEC7A/DNM2/DOCK2/DYSF/F2RL1/FCGR2B/FGR/GAS6/IFNG/IL15/IL1B/IL2RB/IL2RG/ITGA2/LRP1/MBL2/NCKAP1L/PPARG/PRKCG/PRTN3/PTEN/PTPRJ/PTX3/PYCARD/RAPGEF1/SFTPD/SIRPB1/SIRPG/SOD1/SYK/SYT11/TNF/TUB	46
GO:0046189	BP	GO:0046189	phenol-containing compound biosynthetic process	25/5894	45/18866	0.000612587	0.00516118	0.00338933	AGTR2/ASIP/CITED1/DAO/DBH/DCT/DDC/GATA3/GCH1/HAND2/HDC/INSM1/PMEL/PNMT/SLC45A2/SLC6A3/SNCA/TGFB2/TH/TPH1/TRPC1/TYR/TYRP1/VPS35/WNT5A	25
GO:0050803	BP	GO:0050803	regulation of synapse structure or activity	99/5894	240/18866	0.00062382	0.005249	0.003447	ABL1/ACTR2/ADNP/ANAPC2/ARC/ARHGAP22/ARHGAP33/ARHGEF15/BDNF/CAMK2B/CAMKV/CAPRIN1/CBLN1/CDC42/CDH2/CDH8/CDK5R1/CDKL5/CHRNB2/CLN3/CLSTN2/CLSTN3/COLQ/CRIPT/CRKL/CTNNA2/CUX2/DAG1/DBN1/DCTN1/DISC1/DKK1/DLG5/DNM1L/DNM2/DNM3/DRD2/EGLN1/EPHA4/EPHA7/EPHB1/EPHB3/FCGR2B/FLRT3/FRMPD4/FYN/FZD9/GAP43/GHSR/GPC4/GPM6A/GRIN1/GRIN2B/IL1RAPL2/INS/ITPKA/KALRN/KIF1A/LRFN3/LRP4/LRRTM2/LRTM1/MUSK/NEDD4/NEURL1/NEUROD2/NL…	99
GO:0031058	BP	GO:0031058	positive regulation of histone modification	44/5894	92/18866	0.000627655	0.00526077	0.00345473	AKAP8L/ATM/BRD7/CDK9/CTBP1/CTNNB1/CTR9/FOXP3/GATA3/GCG/GLYR1/IL1B/ING2/ISL1/JARID2/KAT7/KMT2A/LIF/MECP2/MYB/NAP1L2/NIPBL/NOS1/OGT/PAF1/PAX7/PHF1/PIH1D1/PRDM12/PRDM9/PRKD1/PRKD2/RNF40/RPS6KA4/RPS6KA5/RTF1/SMAD4/SMARCB1/SPHK2/TP53/UBE2N/WDR61/ZBTB7B/ZNF304	44
GO:0031341	BP	GO:0031341	regulation of cell killing	44/5894	92/18866	0.000627655	0.00526077	0.00345473	AGER/AP1G1/BAD/CD160/CD1B/CD1D/CD226/CLEC7A/CRK/CRTAM/F2RL1/FCGR2B/GAPDH/HLA-E/IFNG/IL12B/IL12RB1/IL13/IL18RAP/IL21/IL23A/IL4/IL7R/KIR2DL4/KRT6A/LAG3/LAMP1/LEP/LGALS9/MICA/MR1/NCR1/NCR3/NOS2/P2RX7/PPP3CB/PRF1/PVR/SERPINB9/SH2D1A/SLC22A13/STAT5B/SYK/VAV1	44
GO:0106027	BP	GO:0106027	neuron projection organization	44/5894	92/18866	0.000627655	0.00526077	0.00345473	ABCD1/ABCD2/ACTR2/ARC/ARHGAP33/CAMK2B/CAPRIN1/CDC42/CDK5R1/CTNND2/CUX2/DBN1/DCTN1/DLG4/DNM1L/DNM3/DOCK10/EPHA4/EPHB1/EPHB3/FCGR2B/FYN/GRIN2B/HDAC6/INS/INSR/ITPKA/KALRN/KIF1A/LGMN/NLGN3/PAFAH1B1/PAK3/PICK1/PPFIA2/PSEN1/PTEN/SHANK1/SIPA1L1/UBE3A/VPS35/WNT7A/ZMYND8/ZNF804A	44
GO:0050807	BP	GO:0050807	regulation of synapse organization	95/5894	229/18866	0.000634347	0.00530619	0.00348455	ABL1/ACTR2/ADNP/ANAPC2/ARC/ARHGAP22/ARHGAP33/ARHGEF15/BDNF/CAMK2B/CAMKV/CAPRIN1/CBLN1/CDC42/CDH2/CDH8/CDK5R1/CDKL5/CHRNB2/CLN3/CLSTN2/CLSTN3/COLQ/CRIPT/CRKL/CTNNA2/CUX2/DAG1/DBN1/DCTN1/DISC1/DKK1/DLG5/DNM1L/DNM3/DRD2/EGLN1/EPHA4/EPHA7/EPHB1/EPHB3/FCGR2B/FLRT3/FRMPD4/FYN/FZD9/GAP43/GHSR/GPC4/GPM6A/GRIN1/GRIN2B/IL1RAPL2/INS/ITPKA/KALRN/KIF1A/LRFN3/LRP4/LRRTM2/LRTM1/MUSK/NEDD4/NEURL1/NEUROD2/NLGN3/N…	95
GO:1903531	BP	GO:1903531	negative regulation of secretion by cell	72/5894	166/18866	0.000634711	0.00530619	0.00348455	ADIPOQ/ADORA1/ADRA2A/ADRA2B/ADRA2C/ADTRP/AGTR2/ASIC1/BCR/BMP8A/BTN2A2/CARTPT/CCR2/CD200/CRH/CRHBP/DRD2/DRD3/DRD4/EDN1/ERP29/FCGR2B/FKBP1B/FOXP3/GHSR/GJA1/GNAI2/HADH/HDAC9/HRH3/HTR1B/IDH2/IL12B/IL1B/INHA/INS/KALRN/LEP/LGALS9/LIF/LRRC32/MTNR1B/NF1/NOTCH1/NPFF/NPVF/NPY5R/OPRM1/OSM/P2RY1/PFKL/PPP3CA/PSMD9/PTGER4/PTPN11/RAB11FIP5/RAB7A/REST/RGCC/RHBDF1/SERGEF/SIRT4/SLC30A1/SNCA/SRGN/STXBP5L/SYT11/TNFR…	72
GO:0021549	BP	GO:0021549	cerebellum development	49/5894	105/18866	0.000645762	0.00539162	0.00354066	ABL1/AGTPBP1/AGTR2/AIF1/ARCN1/CBLN1/CD3E/CDK5R1/CDK5R2/CEND1/CLP1/CNTN1/CRK/CRKL/DAB1/FCGR2B/FOXC1/GBX1/GBX2/HAP1/HERC1/HNRNPD/KCNC1/LHX1/LHX5/LRP6/MECP2/NAGLU/NEUROD2/NLGN4X/OPHN1/PROX1/PSEN1/PTBP2/PTPN11/PTPRS/SCN5A/SEZ6L/SLC25A46/SMO/SSTR1/SSTR2/SSTR3/TP53/TTBK2/TTLL1/WNT1/WNT7A/XRCC1	49
GO:0007519	BP	GO:0007519	skeletal muscle tissue development	69/5894	158/18866	0.000647674	0.00539801	0.00354486	ACTA1/AKIRIN1/ANKRD1/ANKRD2/ARNTL/BCL2/BCL9/BIN3/CASQ1/CAV1/CCNT2/CDON/CHRNA1/CHRND/COL19A1/COPS2/CSRP3/CTNNB1/CYP26B1/DCN/DDX17/EEF2/ELN/EMD/EP300/EPHB1/FBXO22/FOXN2/GPC1/GPX1/GTF3C5/HDAC4/HDAC9/HEYL/HIVEP3/KEL/MEF2D/MSTN/MTM1/MYF5/MYF6/MYH15/MYLPF/MYOD1/MYOG/MYOM2/MYOZ2/NEURL1/NF1/NOTCH1/NPHS1/NUPR1/PAX7/PHOX2B/POPDC2/PPP3CA/PRKAA1/RB1/SAP30/SHH/SKI/SMO/SRPK3/TBX1/TLL2/USP19/WNT10B/YBX3/ZBTB18	69
GO:0048013	BP	GO:0048013	ephrin receptor signaling pathway	42/5894	87/18866	0.000648195	0.00539801	0.00354486	ACTB/ACTR2/ACTR3/AP2A2/AP2S1/APH1A/ARHGEF28/ARHGEF7/ARPC1A/ARPC4/CDC42/CDK5R1/CRK/EFNA2/EFNA3/EFNB2/EFNB3/EPHA4/EPHA5/EPHA7/EPHB1/EPHB3/FYN/GRIN1/GRIN2B/HRAS/KALRN/NCK1/NTRK1/PAK3/PSEN1/PSENEN/PTPN11/RAC1/RASA1/RBPJ/ROCK2/SDCBP/SIPA1L1/SRC/SS18/YES1	42
GO:0002294	BP	GO:0002294	CD4-positive	alpha-beta T cell differentiation involved in immune response	32/5894	62/18866	0.000655944	0.00543458	0.00356887	BATF/FOXP3/GATA3/GPR183/IFNG/IL12B/IL12RB1/IL18R1/IL21/IL23A/IL4/IL4R/IL6/IRF4/JAK3/LGALS9/MALT1/MTOR/MYB/NLRP3/PRKCZ/PTGER4/RARA/RC3H1/RC3H2/SEMA4A/SOCS5/SPN/STAT3/STAT6/TBX21/ZBTB7B	32
GO:0006606	BP	GO:0006606	protein import into nucleus	66/5894	150/18866	0.000656779	0.00543458	0.00356887	AGT/AGTR2/ANGPT1/APPL2/ARNTL/BAG3/BMP4/CABP1/CD36/CDH1/CDKN1A/DRD1/FGF9/FLNA/HCLS1/HDAC3/HYAL2/IFNG/IPO13/IPO5/IPO7/IPO8/JUP/KPNA3/KPNA4/KPNA5/KPNA6/LEP/MAPK1/MAVS/NF1/NPAP1/NUP188/NUP214/NUP54/NUP88/NUP98/PIK3R2/POM121/POM121L2/PPP1R10/PPP3CA/PSEN1/PTGS2/PTTG1IP/RAB23/RAN/RANBP17/RANBP2/RANBP6/RBM22/RPAIN/SHH/SIX2/SIX3/SMAD3/SMO/SNUPN/STAT3/SYK/TARDBP/TMCO6/TP53/TPR/TSC2/UFM1	66
GO:0035107	BP	GO:0035107	appendage morphogenesis	66/5894	150/18866	0.000656779	0.00543458	0.00356887	ALDH1A2/ALX1/ALX3/ALX4/ATRX/B9D1/BMP4/BMPR1A/BMPR1B/CACNA1C/CHD7/CREBBP/CTNNB1/CYP26B1/DKK1/DLX6/DYNC2H1/FBXW4/FGF4/FGF8/FGF9/FGFR1/FGFR2/FRAS1/GDF5/GJA5/GNAS/GPC3/GRHL2/HAND2/HDAC2/HOXD12/IFT122/IFT140/LRP4/LRP6/MBNL1/MEGF8/MSX1/MYH3/NIPBL/NOTCH1/OSR2/PBX2/PSEN1/PTCH1/ROR2/RUNX2/SALL1/SHH/SKI/SMAD4/SOX9/TBX2/TBX3/TBX4/TFAP2A/TGFB2/TMEM231/TRAF3IP1/WDR19/WNT5A/WNT7A/ZNF141/ZNF219/ZNF358	66
GO:0035108	BP	GO:0035108	limb morphogenesis	66/5894	150/18866	0.000656779	0.00543458	0.00356887	ALDH1A2/ALX1/ALX3/ALX4/ATRX/B9D1/BMP4/BMPR1A/BMPR1B/CACNA1C/CHD7/CREBBP/CTNNB1/CYP26B1/DKK1/DLX6/DYNC2H1/FBXW4/FGF4/FGF8/FGF9/FGFR1/FGFR2/FRAS1/GDF5/GJA5/GNAS/GPC3/GRHL2/HAND2/HDAC2/HOXD12/IFT122/IFT140/LRP4/LRP6/MBNL1/MEGF8/MSX1/MYH3/NIPBL/NOTCH1/OSR2/PBX2/PSEN1/PTCH1/ROR2/RUNX2/SALL1/SHH/SKI/SMAD4/SOX9/TBX2/TBX3/TBX4/TFAP2A/TGFB2/TMEM231/TRAF3IP1/WDR19/WNT5A/WNT7A/ZNF141/ZNF219/ZNF358	66
GO:0035148	BP	GO:0035148	tube formation	66/5894	150/18866	0.000656779	0.00543458	0.00356887	ABL1/ADM/ALX1/APAF1/ARHGAP35/ARID1A/BBS4/BCAS3/BMP4/BMP5/BRD2/CASP3/CELSR1/CTNNB1/DICER1/EDA/EDAR/FGF8/FGFR2/FUZ/FZD3/GATA3/GDNF/GLMN/GRHL2/HAND1/HESX1/HOXA1/IFT122/IFT57/LRP2/LRP6/LUZP1/MED12/MTHFR/NOTCH1/OVOL2/PAX2/PAX8/PFN1/PLXNB2/PRKACA/PROX1/PTCH1/RARA/RET/SCRIB/SDC4/SHH/SKI/SOX9/SPINT2/STK4/TCAP/TCTN1/TGFB2/TGM2/TMED2/TRAF6/TSC1/TSC2/VASP/WNT4/WNT5A/WNT6/YWHAZ	66
GO:0030595	BP	GO:0030595	leukocyte chemotaxis	96/5894	232/18866	0.000659724	0.00544657	0.00357675	AIF1/AKIRIN1/ALOX5/ARHGEF5/BST1/C1QBP/C5/C5AR2/CALCA/CCL1/CCL11/CCL13/CCL16/CCL2/CCL21/CCL23/CCL24/CCL25/CCL27/CCL5/CCR2/CCR6/CD74/CNR2/CREB3/CSF1/CSF1R/CSF3R/CX3CL1/CXADR/CXCL2/CXCL3/CXCR1/CYP19A1/CYP7B1/DAPK2/DNM1L/DPEP1/DYSF/EDN1/F2RL1/F7/FFAR2/FLT1/GAS6/GBF1/GPR183/IL17RA/IL1B/IL23A/IL4/IL6/IL6R/ITGA1/LBP/LGALS9/LGMN/MAPK1/MIF/MMP28/MPP1/MST1/MSTN/MTUS1/NCKAP1L/PADI2/PDE4B/PDE4D/PDGFB/PF4/PF4…	96
GO:0071333	BP	GO:0071333	cellular response to glucose stimulus	60/5894	134/18866	0.00065991	0.00544657	0.00357675	AACS/ADCY8/ADRA2A/AGER/BAD/BAIAP3/BRSK2/CASR/CDK16/CPB2/CRH/CYP7A1/ENDOG/EPHA5/ERN1/FKBP1B/GAS6/GATA4/GCG/GHRHR/GPLD1/GPR27/GPR68/GRIK5/HMGN3/IRS2/KIF5B/LIN28A/LRP1/MLXIPL/MPC2/NADK/NR1H4/PAX2/PCK1/PDK3/PDX1/PIH1D1/PLA2G6/POLG/PPP3CA/PPP3CB/PRKAA1/PRKACA/PRKCE/RAB11B/RAB11FIP5/RAC1/SIDT2/SLC29A1/SMARCA4/SMARCB1/SRF/STAR/STX4/SYBU/TH/TRPM4/VSNL1/ZNF236	60
GO:0001702	BP	GO:0001702	gastrulation with mouth forming second	17/5894	27/18866	0.000670057	0.00550927	0.00361792	ACVR2B/AMOT/CHRD/CTNNB1/ETS2/FRS2/GDF3/LHX1/LRP6/MEGF8/NAT8B/SMAD4/SRF/TENM4/UGDH/WNT5A/ZBTB17	17
GO:0003148	BP	GO:0003148	outflow tract septum morphogenesis	17/5894	27/18866	0.000670057	0.00550927	0.00361792	BMP4/BMPR1A/BMPR2/ENG/FGF8/FGFR2/ISL1/LRP2/NKX2-5/RARA/ROBO1/SMAD4/SMAD6/TBX1/TBX2/TGFB2/ZFPM2	17
GO:0051953	BP	GO:0051953	negative regulation of amine transport	17/5894	27/18866	0.000670057	0.00550927	0.00361792	ADORA1/ADRA2A/ADRA2B/ADRA2C/AGTR2/CRH/DRD2/GHSR/HRH3/HTR1B/LEP/NPY5R/P2RY1/RGS4/SNCA/SYT11/TRH	17
GO:0060411	BP	GO:0060411	cardiac septum morphogenesis	38/5894	77/18866	0.000674879	0.00554188	0.00363933	BMP4/BMP5/BMPR1A/BMPR2/CHD7/EGLN1/ENG/FGF8/FGFR2/GATA4/GJA5/HAND1/HES1/HEY2/HEYL/ID2/ISL1/JAG1/LRP2/MDM2/NKX2-5/NOS3/NOTCH1/PROX1/RARA/RBPJ/ROBO1/SMAD4/SMAD6/SMO/TBX1/TBX2/TBX3/TGFB2/TP53/WNT11/WNT5A/ZFPM2	38
GO:1903362	BP	GO:1903362	regulation of cellular protein catabolic process	106/5894	260/18866	0.000675802	0.00554243	0.0036397	ABCA2/ARAF/ARIH1/ARIH2/ATXN3/BAG2/BAG5/BAG6/BBS7/BRSK2/CAV1/CAV3/CBFA2T3/CCAR2/CCDC22/CEBPA/CHFR/CLEC16A/CSNK1A1/CSNK1D/CSNK1E/DDA1/DERL2/DET1/DISC1/DNAJB2/EDEM1/EGF/EPHA4/F13B/FAF1/FBXO22/FOXF2/FZR1/GLMN/GPX1/GSK3A/HFE/LATS1/LDLR/LRP1/LRP2/MAPK9/MDM2/MGAT3/MTM1/MYLIP/NELL1/NFE2L2/NUDT15/NUPR1/OGT/OPHN1/OS9/OSBPL7/PLK2/PRKACA/PRKCG/PSEN1/PSMC4/PSMF1/PTEN/PTK2B/PTTG1IP/PYHIN1/RAD23B/RBX1/RCHY1/RDX…	106
GO:0043647	BP	GO:0043647	inositol phosphate metabolic process	36/5894	72/18866	0.000678145	0.00554496	0.00364136	ADCYAP1R1/AVPR1B/BPNT1/GALR2/IMPA1/INPP4B/INPP5B/INPP5J/INPP5K/IP6K2/IPPK/ITPK1/ITPKA/ITPKB/LHCGR/MTMR7/NTSR1/NUDT4/OCRL/P2RY1/PLCB1/PLCB2/PLCB3/PLCE1/PLCH1/PLCH2/POU1F1/PPIP5K1/PPIP5K2/PTAFR/PTEN/PTH/PTK2B/SNCA/SYNJ1/SYNJ2	36
GO:0050663	BP	GO:0050663	cytokine secretion	36/5894	72/18866	0.000678145	0.00554496	0.00364136	AGT/AGTR2/BTN2A2/C1QTNF3/CRTAM/DRD2/DYSF/FCGR2B/FGR/FOXP3/GAPDH/GLMN/HDAC9/HTR2B/IFNG/IL26/INS/LRRC32/MIF/NLRP3/NOX5/P2RX7/PTGER4/RGCC/S100A13/SCAMP5/SORL1/SPHK2/SRC/SRGN/SYK/SYT11/TLR6/TLR8/TNF/TNFRSF4	36
GO:0008585	BP	GO:0008585	female gonad development	47/5894	100/18866	0.000678678	0.00554496	0.00364136	ADCYAP1/AFP/AMHR2/ATM/BCL2/BCL2L1/BMPR1B/CASP3/CYP19A1/DMC1/EIF2B2/ESR1/FOXC1/FSHB/FSHR/GDF9/GNRH1/HYAL3/IDH1/INHA/INSR/KITLG/KMT2B/LEP/LFNG/LHCGR/MSH4/NOS3/NR5A1/NRIP1/NUPR1/PCYT1B/PGR/PLEKHA1/PTX3/RETN/SGPL1/SMAD4/SOD1/SPO11/SRC/STAT5B/UBE3A/VGF/WNT4/WT1/ZFPM2	47
GO:0042987	BP	GO:0042987	amyloid precursor protein catabolic process	27/5894	50/18866	0.000685265	0.00559173	0.00367207	ABCA2/ABCA7/AGER/APH1A/BACE1/BIN1/CASP3/CLN3/EFNA3/EPHA4/FLOT2/GGA3/GSAP/GSK3A/HAP1/IFNG/PICALM/PIN1/PSEN1/PSENEN/RELA/ROCK2/SORL1/SPON1/TMED10/TNF/UNC13A	27
GO:0032409	BP	GO:0032409	regulation of transporter activity	117/5894	291/18866	0.00068865	0.00561228	0.00368556	ACTB/ACTN2/ACTN4/ADRA2A/ADRB2/APOA2/ARC/ATP2A1/BCL2/CACNA1D/CACNA2D1/CACNB1/CACNB3/CACNG2/CACNG3/CACNG4/CACNG5/CASQ1/CAV1/CAV3/CCL2/CCR2/CHRM3/CLIC2/CNIH3/CRH/CRHBP/CRHR1/DAPK1/DLG1/DLG4/DNM2/DRD2/DRD3/DRD4/DYSF/EPO/FGF12/FGF13/FKBP1B/FXYD2/FXYD3/FXYD5/FXYD6/FXYD7/GAL/GALR2/GJA1/GRIA1/GRIA2/GRIA3/GRIA4/GRIN1/GRIN2A/GRIN2B/GRM5/GSTM2/HAP1/HECW1/HPCA/HTR3A/IFNG/INS/JPH3/KCNA1/KCNC1/KCNC2/KCNE1/KCNE…	117
GO:0010092	BP	GO:0010092	specification of animal organ identity	21/5894	36/18866	0.000696559	0.00566233	0.00371843	BMP2/BMP4/CTNNB1/DKK1/FGF1/FGF8/FGFR1/FGFR2/FOXH1/FRS2/GDNF/ISL1/LRP2/PAX2/PAX8/RBPJ/ROBO1/TBR1/WNT11/WNT2B/WNT5A	21
GO:0031128	BP	GO:0031128	developmental induction	21/5894	36/18866	0.000696559	0.00566233	0.00371843	BMP2/BMP4/C12orf43/CTNNB1/DKK1/FGF1/FGF8/FGFR1/FRS2/FZD5/GDNF/NKX2-1/ROBO1/SALL1/SIX3/SOX9/WNT1/WNT11/WNT2B/WNT4/WNT5A	21
GO:1900542	BP	GO:1900542	regulation of purine nucleotide metabolic process	55/5894	121/18866	0.000697413	0.00566233	0.00371843	AAAS/ARNT/CBFA2T3/EIF6/EP300/ESRRB/GAPDHS/GCK/GPD1/GSTZ1/GUCA1B/GUCA2B/HDAC4/HPCA/HTR2A/IFNG/IL4/INS/INSR/MLXIPL/MYOG/NOS1/NOS2/NOS3/NUP188/NUP214/NUP54/NUP88/NUP98/NUPR1/OGT/P2RX7/PDK3/PDPR/PDZD3/PFKFB1/PFKFB3/PFKFB4/PGAM1/POM121/PPARA/PRKAA1/PRKAG2/PSEN1/RANBP2/RCVRN/SEC13/SEH1L/SIRT6/SLC25A12/SLC4A1/SPHK2/STAT3/TMSB4X/TPR	55
GO:0001678	BP	GO:0001678	cellular glucose homeostasis	67/5894	153/18866	0.000702882	0.0056978	0.00374173	AACS/ADCY8/ADRA2A/AGER/BAD/BAIAP3/BRSK2/CARTPT/CASR/CDK16/CPB2/CRH/CYP7A1/ENDOG/EPHA5/ERN1/FKBP1B/FOXO1/GAS6/GATA4/GCG/GCK/GHRHR/GPLD1/GPR27/GPR68/GRIK5/HKDC1/HMGN3/IRS2/KIF5B/KLF15/LIN28A/LRP1/MLXIPL/MPC2/NADK/NGFR/NR1H4/PAX2/PCK1/PDK3/PDX1/PIH1D1/PIK3R2/PLA2G6/POLG/PPP3CA/PPP3CB/PRKAA1/PRKACA/PRKCE/RAB11B/RAB11FIP5/RAC1/SIDT2/SLC29A1/SMARCA4/SMARCB1/SRF/STAR/STX4/SYBU/TH/TRPM4/VSNL1/ZNF236	67
GO:0016051	BP	GO:0016051	carbohydrate biosynthetic process	89/5894	213/18866	0.000703541	0.0056978	0.00374173	ADCYAP1R1/ADIPOQ/AGL/AKT2/ALDOA/ALDOC/ARPP19/ATF4/AVPR1B/B3GALNT1/B3GALT1/B3GALT2/B3GNT4/C1QTNF3/CHST10/CHST8/DGKQ/DYRK2/EGF/ENO3/EP300/ESRRB/FOXO1/G6PC2/G6PC3/GAPDH/GAPDHS/GCG/GCK/GNMT/GPD1/GPD2/GPI/GPT/GSK3A/GYG1/GYG2/GYS1/HAS1/HS2ST1/IMPA1/INPP5K/INS/INSR/IRS2/LALBA/LEP/LHCGR/MDH1/MDH2/MPDU1/MST1/MTOR/NANS/NDST3/NDST4/NFKB1/NTSR1/OGT/P2RY1/PASK/PCK1/PDGFB/PFKFB1/PGAM1/PGK1/PGK2/PGP/PHKG1/POU1F…	89
GO:0030183	BP	GO:0030183	B cell differentiation	61/5894	137/18866	0.000713405	0.00577048	0.00378945	ABL1/ATM/BAD/BCL2/BTK/CD40LG/CDH17/CEBPG/CYLD/DCLRE1C/DNAJB9/DOCK10/EP300/FCGR2B/FLT3/FZD9/GPR183/GPS2/HDAC4/HDAC9/HHEX/ID2/IFNA1/IFNA10/IFNA14/IFNA16/IFNA17/IFNA2/IFNA4/IFNA5/IFNA7/IFNA8/IFNB1/IFNW1/IKZF3/IL21/IL4/IL6/INHA/ITFG2/JAK3/LFNG/LYL1/MALT1/NCKAP1L/NTRK1/ONECUT1/PCID2/PLCL2/POLM/POU1F1/PTK2B/PTPRJ/RAG2/RBPJ/SP3/STAT5B/SYK/TP53/TPD52/ZFP36L1	61
GO:0086004	BP	GO:0086004	regulation of cardiac muscle cell contraction	24/5894	43/18866	0.000716162	0.00578555	0.00379935	ADORA1/ATP1A1/ATP2A1/ATP2A2/BIN1/CACNA1C/CAV1/CAV3/CTNNA3/DLG1/DSP/FGF13/FLNA/GATA4/GJA5/HCN4/JUP/KCNJ2/PDE4B/PDE4D/PKP2/RANGRF/SCN5A/TRPM4	24
GO:0055001	BP	GO:0055001	muscle cell development	78/5894	183/18866	0.000729641	0.0058871	0.00386604	ACTA1/ACTN2/ADM/ADRA1A/AFG3L2/AGT/AGTR2/ALPK3/ANKRD1/ATG5/ATP2A2/BCL2/BIN1/BIN3/BMP10/BMP4/CAPN3/CASQ1/CAV3/CHRNB1/COMP/CSRP3/CTDP1/CXADR/DYSF/EDN1/ENG/FBXO22/FHOD3/GATA4/GPX1/GSK3A/HDAC4/HDAC9/HES1/HEY2/KEL/KRT19/MAML1/MTOR/MYF5/MYF6/MYH3/MYH6/MYL2/MYLK3/MYOD1/MYOF/MYOG/MYOZ2/NKX2-5/NOTCH1/NPPA/NRAP/OBSCN/OBSL1/PIN1/PPARA/PPP3CA/PROX1/PTCD2/RGS4/SDC1/SGCB/SKI/SLC8A1/SMAD4/SMO/SRF/TBX3/TCAP/TMOD2…	78
GO:0046578	BP	GO:0046578	regulation of Ras protein signal transduction	82/5894	194/18866	0.000737379	0.00594214	0.00390218	ABL1/ADRA1A/APOC3/ARFGEF2/ARHGAP24/ARHGAP35/ARHGDIA/ARHGDIB/ARHGEF10/ARHGEF18/ARHGEF2/ARHGEF28/BCR/CADM4/CBL/CDC42SE1/CRK/CRKL/CSF1/CYTH2/CYTH3/CYTH4/DENND4A/DNM2/EPO/EPOR/EPS8/F2RL1/F2RL2/F2RL3/GBF1/GPR17/GPR20/GPR65/GRB2/HEG1/HRAS/IQSEC1/IQSEC2/IQSEC3/IRS2/ITPKB/KALRN/KCTD13/KITLG/KRAS/LPAR4/LZTR1/MADD/MAP4K4/MAPKAP1/MAPRE2/MFN2/NET1/NF1/NGF/NOTCH1/NTRK1/OGT/OPHN1/PLCE1/PSD/PSD3/PSD4/RAC1/RAPGE…	82
GO:0022029	BP	GO:0022029	telencephalon cell migration	29/5894	55/18866	0.000738519	0.00594393	0.00390336	CDK5R1/CDK5R2/CNTN2/CTNNB1/DAB1/DISC1/DRD1/DRD2/EFHC1/FEZF2/FGF13/FOXB1/FOXG1/HTR6/LHX6/MBOAT7/NDEL1/NKX2-1/NR2E1/PAFAH1B1/POU3F2/POU3F3/PSEN1/ROBO1/RTN4/SRF/SUN1/SYNE2/TNR	29
GO:0003071	BP	GO:0003071	renal system process involved in regulation of systemic arterial blood pressure	16/5894	25/18866	0.000744595	0.00597798	0.00392572	ADORA1/AGT/AGTR2/CYP11B2/CYP4A11/CYP4F2/F2RL1/GAS6/GJA1/GJA5/HSD11B2/OR51E2/PDGFB/PTPRO/REN/SERPINF2	16
GO:0043302	BP	GO:0043302	positive regulation of leukocyte degranulation	16/5894	25/18866	0.000744595	0.00597798	0.00392572	AP1G1/CD177/F2RL1/FGR/IL13/IL4/IL4R/LAMP1/NPPA/PLA2G3/PTAFR/SPHK2/STX4/STXBP1/SYK/VAMP7	16
GO:0022612	BP	GO:0022612	gland morphogenesis	56/5894	124/18866	0.000760991	0.00610206	0.0040072	BCL2/BMP4/CAV1/CAV3/CCL11/CDC42/CPB2/CRIP1/CSF1/CSF1R/CYP7B1/DAG1/EDA/EDAR/ESR1/FEM1B/FGF1/FGF8/FGFR1/FGFR2/FGL1/FOXA1/FRS2/HGF/HOXB13/HPN/IGFBP5/IL6/KDM5B/LAMA1/LRP6/NOTCH1/NTN1/PAX6/PGR/POLB/PROP1/PROX1/PTCH1/RXRA/SCRIB/SEMA3A/SERPINB5/SHH/SOSTDC1/SOX9/SRC/STAT6/TBX2/TBX3/TGFB2/TGM2/TNF/VDR/WNT4/WNT5A	56
GO:0010675	BP	GO:0010675	regulation of cellular carbohydrate metabolic process	65/5894	148/18866	0.000762147	0.00610377	0.00400832	ADCYAP1R1/ADIPOQ/AKT2/ARPP19/AVPR1B/BAD/C1QTNF1/C1QTNF3/CBFA2T3/COX11/DGKQ/DYRK2/EP300/ESRRB/FOXO1/GCG/GCGR/GCK/GNB3/GNMT/GPLD1/GPT/GSK3A/HDAC4/INPP5K/INS/INSR/IRS2/KHK/LCMT1/LEP/LHCGR/MST1/MTOR/MYOG/NTSR1/NUPR1/OGT/P2RY1/PASK/PDK3/PFKFB1/PGAM1/PGP/PHLDA2/POMC/POU1F1/PPARA/PPP1R3A/PPP1R3D/PRKCE/PTAFR/PTH/PTK2B/RANBP2/SCARB2/SIRT6/SLC25A12/SLC4A1/SNCA/SOGA1/SRC/STAT3/TP53/ZMPSTE24	65
GO:0035418	BP	GO:0035418	protein localization to synapse	41/5894	85/18866	0.000763474	0.00610685	0.00401035	ADAM22/BSN/CACNG2/CACNG3/CACNG4/CACNG5/CEP112/CLSTN3/DAG1/DBN1/DLG1/DLG4/GHSR/GPC4/GPHN/GRIN1/GRIN2A/GRIN2C/GRIP1/GRIP2/HRAS/IQSEC2/KIF17/KIF5A/KIF5B/MAPK10/MAPK8IP3/NPHS1/NPTN/NRXN2/PCLO/PRKCZ/RAPSN/SCRIB/SHANK1/SNAP25/STX3/TERF2/VPS35/WNT5A/WNT7A	41
GO:0097553	BP	GO:0097553	calcium ion transmembrane import into cytosol	62/5894	140/18866	0.000768671	0.00614084	0.00403267	ABL1/APLNR/ATG5/ATP2B4/BDKRB1/CACNA1C/CACNA2D1/CALCR/CAPN3/CASQ1/CCL21/CHD7/CLIC2/CX3CL1/DRD1/DRD2/F2/F2RL3/FAM155A/FAM155B/FASLG/FKBP1B/FYN/GRIN1/GRIN2A/GRIN2B/GRIN2C/GRIN2D/GSTM2/HAP1/HTR2A/HTR2B/HTR2C/IL13/JPH3/LETM1/LIME1/MCOLN1/MCOLN3/NOS1/NTSR1/P2RX7/PDE4D/PKD2/PRKACA/PRKCE/PTK2B/RAMP3/RASA3/RYR3/SLC24A1/SLC24A2/SLC8A1/SLC8B1/SNCA/TRDN/TRPA1/TRPC1/TRPM2/TRPV4/TRPV5/TRPV6	62
GO:0019229	BP	GO:0019229	regulation of vasoconstriction	31/5894	60/18866	0.000773943	0.00615261	0.0040404	ACE/ADM/ADRA1A/ADRA1B/ADRA2A/ADRA2B/ADRA2C/AGT/AVP/AVPR1A/AVPR1B/AVPR2/BMPR2/CASR/CAV1/CHRM3/DBH/DOCK5/EDN1/FGB/GJA1/GJA5/HRH2/HTR2A/KCNMB2/KCNMB4/LEP/OXTR/PTAFR/PTGS2/TRPM4	31
GO:0035904	BP	GO:0035904	aorta development	31/5894	60/18866	0.000773943	0.00615261	0.0040404	ADAMTS6/ADAMTS9/BMPR1A/CHD7/DCTN5/DNM2/EFNB2/ENG/EYA1/FGF8/FOXH1/HES1/HEY2/JAG1/LEP/LRP1/LRP2/LTBP1/NGFR/NOTCH1/PKD2/PROX1/RBPJ/ROBO1/SMAD6/SNX17/SRF/TAB1/TBX1/TBX2/TGFB2	31
GO:0048747	BP	GO:0048747	muscle fiber development	31/5894	60/18866	0.000773943	0.00615261	0.0040404	ACTA1/AFG3L2/BCL2/BIN3/BMP4/CHRNB1/COMP/CXADR/DYSF/FBXO22/GPX1/HDAC4/HDAC9/KEL/MYF5/MYF6/MYH6/MYL2/MYOD1/MYOF/MYOG/NRAP/PPP3CA/PTCD2/SGCB/SKI/SMO/TCAP/TTN/WNT10B/ZMPSTE24	31
GO:0050994	BP	GO:0050994	regulation of lipid catabolic process	31/5894	60/18866	0.000773943	0.00615261	0.0040404	AADAC/ABCB11/ABCD1/ABCD2/ADORA1/ADRA2A/AKT2/ANGPTL3/APOA2/APOA4/APOC3/CPT1A/CRTC3/FABP1/GPLD1/IDH1/IL1B/INS/IRS2/LDLR/MTOR/PDE3B/PIK3CG/PNPLA2/PPARA/PRKAA1/PRKCE/SCT/SORL1/THRA/TNF	31
GO:0062197	BP	GO:0062197	cellular response to chemical stress	141/5894	360/18866	0.000779905	0.00619241	0.00406653	ABCD1/ABL1/ADNP2/AIF1/ALOX5/ANKRD2/ANKZF1/APOA4/ARHGEF2/ARNT/ARNTL/ATF4/ATG5/ATG7/ATM/ATP2A2/BAD/BAG5/BCL2/BRF2/BTK/CAPN3/CASP3/CAV1/CBX8/CD36/CHUK/CLN3/CRK/CRYGD/CTNNB1/CYCS/CYP1B1/DAPK1/DDX3X/DHRS2/DNM2/DPEP1/DYSF/EIF2AK3/ENDOG/EPAS1/EPO/ETS1/FABP1/FANCC/FOXO1/FYN/GATA4/GCH1/GLRX2/GPR37L1/GPX1/GSR/GSTP1/HDAC2/HDAC6/HGF/HNRNPD/IL18RAP/IL6/IMPACT/INS/KCNC2/KDM6B/LANCL1/LETM1/LRRC8E/MAP3K5/MAPK1/M…	141
GO:0016042	BP	GO:0016042	lipid catabolic process	135/5894	343/18866	0.000792865	0.00627705	0.00412211	AADAC/ABCB11/ABCD1/ABCD2/ABCD4/ABHD2/ABHD3/ABHD4/ABHD6/ACAD10/ACADL/ACADS/ACAT2/ACOT8/ACOXL/ADIPOQ/ADORA1/ADRA2A/ADTRP/AKR1B10/AKR1D1/AKT2/ANGPTL3/AOAH/APOA2/APOA4/APOC3/AUH/CEL/CES3/CPS1/CPT1A/CRABP1/CRTC3/CYP19A1/CYP1A2/CYP1B1/CYP26B1/CYP27A1/CYP2W1/CYP39A1/CYP46A1/CYP4A11/CYP4F2/CYP4F3/CYP7A1/DDHD2/DECR2/ECH1/ECHDC1/ECI1/ECI2/ENPP2/ETFA/ETFB/FAAH/FABP1/FABP2/FABP3/FABP4/FABP5/FABP6/FABP7/GBA3/…	135
GO:0032729	BP	GO:0032729	positive regulation of interferon-gamma production	33/5894	65/18866	0.000793761	0.00627705	0.00412211	CCR2/CD2/CD226/CD3E/CEBPG/CLEC7A/CRTAM/EBI3/FZD5/HLA-DPA1/HLA-DPB1/HMHB1/HRAS/IL12B/IL12RB1/IL12RB2/IL18R1/IL1B/IL1R1/IL21/IL23A/ISL1/LGALS9/LTA/PDE4B/PDE4D/PTPN22/PYCARD/SCRIB/TLR7/TLR8/TNF/WNT5A	33
GO:0060389	BP	GO:0060389	pathway-restricted SMAD protein phosphorylation	33/5894	65/18866	0.000793761	0.00627705	0.00412211	ACVR1B/BMP10/BMP2/BMP3/BMP4/BMP5/BMP6/BMP8A/BMP8B/BMPR1A/BMPR2/CSNK2B/DKK1/EMILIN1/ENG/GDF11/GDF15/GDF2/GDF3/GDF5/GDF9/HFE/INHA/INHBC/INHBE/LDLRAD4/LEFTY1/MSTN/PIN1/SDCBP/SMAD4/SMAD6/TGFB2	33
GO:0008344	BP	GO:0008344	adult locomotory behavior	37/5894	75/18866	0.000796144	0.00627705	0.00412211	ADAM22/ARCN1/CEND1/CHD7/CHL1/CNP/CNTN2/DAB1/DRD1/DRD2/DRD4/EFNB3/EPHA4/EPS8/FGF12/GBX1/GDNF/GIP/GLRA1/GLRB/GRIN1/GRIN2D/HOXB8/ID2/KALRN/KCNJ10/MECP2/NPC1/NTAN1/NTSR1/PAFAH1B1/PREX2/SCN1A/SEZ6L/SPTBN4/TSC1/ZMPSTE24	37
GO:0072088	BP	GO:0072088	nephron epithelium morphogenesis	37/5894	75/18866	0.000796144	0.00627705	0.00412211	AGT/AGTR2/AHI1/BCL2/BMP2/BMP4/CITED1/CTNNB1/DCHS1/DLG1/EYA1/FGF1/FGF8/GATA3/GDNF/GPC3/GREB1L/HES1/KLHL3/LHX1/LIF/PAX2/PAX8/PKD2/PTCH1/SALL1/SHH/SIX2/SMAD4/SMO/SOX9/WNT1/WNT11/WNT2B/WNT4/WNT6/WT1	37
GO:0050810	BP	GO:0050810	regulation of steroid biosynthetic process	46/5894	98/18866	0.00079709	0.00627705	0.00412211	ADM/ATP1A1/BMP2/BMP5/BMP6/CGA/CYP7A1/DGKQ/DKKL1/ERLIN2/FASN/FDFT1/FGF1/FGFR4/FSHB/GFI1/GGPS1/H6PD/HMGCS1/IDI1/IFNG/IL1B/INSIG1/LEP/LPCAT3/MBTPS2/MVD/NFKB1/NFYB/NFYC/NR0B1/NR1H4/NR5A1/PRKAA1/PROX1/RAN/REST/SC5D/SF1/SNAI1/SOD1/SREBF2/STAR/TNF/VDR/WNT4	46
GO:0051897	BP	GO:0051897	positive regulation of protein kinase B signaling	76/5894	178/18866	0.000797347	0.00627705	0.00412211	ANGPT1/BAG4/C1QBP/C1QTNF1/CALCR/CCL21/CD28/CSF3/CX3CL1/EGF/ENG/ERBB4/ESR1/F3/F7/FGF1/FGF16/FGF17/FGF18/FGF20/FGF22/FGF3/FGF4/FGF5/FGF6/FGF8/FGF9/FGFR1/FGFR2/FGFR3/FGFR4/FRS2/FYN/GAS6/GATA3/GCNT2/GDF15/GPX1/GRB2/HAX1/HCLS1/HGF/IAPP/IGFBP5/IL26/INS/INSR/IRS2/KITLG/LEP/LIN28A/LRP2/MST1R/MTOR/OSM/PDGFB/PIK3CB/PIK3CG/PIK3R2/PIK3R5/PTPN11/PTPRJ/RAC1/RAMP3/RET/RTN4/SPRY2/SRC/TCF7L2/TGFA/THPO/TNF/TNFSF11…	76
GO:0003143	BP	GO:0003143	embryonic heart tube morphogenesis	35/5894	70/18866	0.000800379	0.0062778	0.00412261	AHI1/BBS4/BBS7/CCDC40/DNAAF1/ENG/FGF8/FOXH1/GATA4/HAND1/HAND2/HES1/IFT57/LBX1/MEGF8/MICAL2/NDRG4/NKX2-5/NOTCH1/OVOL2/PKD2/PSEN1/SHH/SMAD3/SMO/SOX18/SRF/TBR1/TBX2/TBX21/TBX3/TMED2/WNT5A/YAP1/ZIC3	35
GO:0042311	BP	GO:0042311	vasodilation	20/5894	34/18866	0.000803499	0.0062778	0.00412261	ADORA1/ADRB1/ADRB2/ADRB3/AGT/AGTR2/ATG5/CALCA/CASR/CPS1/DRD1/GCH1/GPX1/ITGA1/KNG1/NOS1/NOS3/NPPA/PRKG1/SOD1	20
GO:0045907	BP	GO:0045907	positive regulation of vasoconstriction	20/5894	34/18866	0.000803499	0.0062778	0.00412261	ADRA1A/ADRA1B/ADRA2C/AVP/AVPR1A/AVPR1B/AVPR2/CASR/CAV1/CHRM3/DBH/FGB/GJA1/GJA5/HRH2/HTR2A/OXTR/PTAFR/PTGS2/TRPM4	20
GO:0050715	BP	GO:0050715	positive regulation of cytokine secretion	20/5894	34/18866	0.000803499	0.0062778	0.00412261	AGTR2/C1QTNF3/CRTAM/DRD2/FGR/GAPDH/GLMN/HTR2B/IFNG/IL26/INS/MIF/P2RX7/PTGER4/RGCC/SCAMP5/SORL1/SRC/SYK/TNF	20
GO:0006707	BP	GO:0006707	cholesterol catabolic process	9/5894	11/18866	0.000804225	0.0062778	0.00412261	AKR1D1/CEL/CYP27A1/CYP39A1/CYP46A1/CYP7A1/MT3/SCARF1/SNX17	9
GO:0016127	BP	GO:0016127	sterol catabolic process	9/5894	11/18866	0.000804225	0.0062778	0.00412261	AKR1D1/CEL/CYP27A1/CYP39A1/CYP46A1/CYP7A1/MT3/SCARF1/SNX17	9
GO:0034776	BP	GO:0034776	response to histamine	9/5894	11/18866	0.000804225	0.0062778	0.00412261	AOC1/DRD2/DRD3/DRD4/GABRA1/GABRB1/GABRB2/GABRB3/GABRG2	9
GO:0031280	BP	GO:0031280	negative regulation of cyclase activity	15/5894	23/18866	0.000818723	0.00636795	0.00418181	AKAP5/CCR2/DRD2/DRD3/GABBR2/GALR1/GALR2/GNAI2/GPR87/GRM2/GRM3/HPCA/LTB4R2/NPR3/PDZD3	15
GO:0032098	BP	GO:0032098	regulation of appetite	15/5894	23/18866	0.000818723	0.00636795	0.00418181	BBS4/CARTPT/CCK/GHSR/HTR2C/HTR4/LEP/NENF/NPFF/OPRM1/POMC/PPARA/SCT/SCTR/SLC22A3	15
GO:0072010	BP	GO:0072010	glomerular epithelium development	15/5894	23/18866	0.000818723	0.00636795	0.00418181	ADIPOQ/BMP4/FOXC1/FOXC2/FOXJ1/IQGAP1/JAG1/KLF15/MAGI2/MYO1E/NPHS1/NPHS2/PECAM1/PTPRO/WT1	15
GO:0046939	BP	GO:0046939	nucleotide phosphorylation	60/5894	135/18866	0.000830117	0.00644884	0.00423493	AAAS/AK1/AK5/ALDOA/ALDOC/ARNT/BPGM/CBFA2T3/EIF6/ENO3/EP300/ESRRB/GAPDH/GAPDHS/GCK/GPD1/GPI/HDAC4/HKDC1/HTR2A/IFNG/INS/INSR/MLXIPL/MYOG/NME3/NME7/NUP188/NUP214/NUP54/NUP88/NUP98/NUPR1/OGDH/OGDHL/OGT/P2RX7/PFKFB1/PFKFB3/PFKFB4/PFKL/PFKP/PGAM1/PGK1/PGK2/PKLR/PNKP/POM121/PPARA/PRKAA1/PRKAG2/PSEN1/RANBP2/SEC13/SEH1L/SIRT6/SLC4A1/STAT3/TPI1/TPR	60
GO:0072080	BP	GO:0072080	nephron tubule development	44/5894	93/18866	0.000834678	0.0064765	0.0042531	AGT/AGTR2/AHI1/BCL2/BMP2/BMP4/CITED1/CTNNB1/DCHS1/DLG1/EYA1/FGF1/FGF8/GATA3/GDNF/GPC3/GREB1L/HES1/HEYL/JAG1/KLHL3/LHX1/LIF/MTSS1/NOTCH1/PAX2/PAX8/PKD2/POU3F3/PTCH1/SALL1/SHH/SIX2/SMAD4/SMO/SOX9/UMOD/WNT1/WNT11/WNT2B/WNT4/WNT6/WT1/YAP1	44
GO:0051924	BP	GO:0051924	regulation of calcium ion transport	103/5894	253/18866	0.000844684	0.0065463	0.00429893	ABL1/ADCYAP1R1/ADRA2A/AGT/APLNR/ATG5/ATP2A1/ATP2C2/BCL2/BDKRB1/BEST1/BIN1/CACNA1B/CACNA1C/CACNA1D/CACNA2D1/CACNB1/CACNB3/CACNG1/CALCR/CAMK2A/CAMK2B/CAPN3/CASQ1/CASR/CAV1/CAV3/CCL2/CCL5/CD33/CHD7/CLIC2/CRH/CRHR1/CTNNB1/CX3CL1/DRD1/DRD2/DRD3/DRD4/DYSF/EGF/EPO/F2/F2RL3/FKBP1B/FYN/GCG/GJA1/GNAI2/GRIN1/GRM6/GSTM2/HAP1/HPCA/IL13/INPP5K/JPH3/LILRA5/LIME1/LPAR3/MCHR1/NOS1/NOS3/NPPA/NTSR1/OPRL1/P2RX3/P2RX…	103
GO:0043467	BP	GO:0043467	regulation of generation of precursor metabolites and energy	70/5894	162/18866	0.000848554	0.00656059	0.00430832	AAAS/ABCD1/AKT2/ARNT/CBFA2T3/CISD1/COX7A2/DNAJC15/DYRK2/EIF6/EP300/ESRRB/GAPDHS/GCGR/GCK/GPD1/GSK3A/HDAC4/HTR2A/IDE/IFNG/IL4/INPP5K/INS/INSR/IRS2/ISCU/KHK/MLXIPL/MTOR/MYOG/NOS2/NUP188/NUP214/NUP54/NUP88/NUP98/NUPR1/OGT/P2RX7/PASK/PDE12/PFKFB1/PFKFB3/PFKFB4/PGAM1/PGK1/PGK2/PHLDA2/POM121/POMC/PPARA/PPP1R3A/PPP1R3D/PRDM16/PRKAA1/PRKAG2/PSEN1/PTH/RANBP2/SEC13/SEH1L/SIRT6/SLC25A12/SLC4A1/SNCA/SPHK2/ST…	70
GO:1902652	BP	GO:1902652	secondary alcohol metabolic process	70/5894	162/18866	0.000848554	0.00656059	0.00430832	ACADL/ACAT2/ACO2/AKR1D1/ANGPTL3/APOA2/APOA4/APOF/CEBPA/CEL/CETP/CLN6/CUBN/CYB5R3/CYP11B1/CYP11B2/CYP1A2/CYP27A1/CYP2R1/CYP39A1/CYP46A1/CYP7A1/CYP7B1/DGKQ/EBP/ERLIN2/FASN/FDFT1/FDX1/FDXR/FGF1/FGFR1/GGPS1/GNB3/HDLBP/HMGCS1/HSD17B7/IDH1/IDH2/IDH3A/IDH3B/IDH3G/IDI1/IL4/INSIG1/LCAT/LDLR/LEP/LIPE/LPCAT3/MBTPS2/MT3/MVD/NFYB/NFYC/NPC1/NPC1L1/NR1H4/PON1/PPARD/PRKAA1/RAN/RXRA/SC5D/SCARF1/SNX17/SOAT2/SOD1/S…	70
GO:0009314	BP	GO:0009314	response to radiation	171/5894	447/18866	0.000852012	0.00657948	0.00432072	AANAT/ABCA4/ADAM2/AGRP/AIPL1/AKT2/APOBEC1/ATF4/ATM/ATP8A2/BACE1/BCL2/BCL2L1/BEST1/C9orf116/CACNA1F/CAMKMT/CASP3/CBL/CCAR2/CCK/CCL11/CCND1/CCR4/CDKN1A/CDKN2D/CEP250/CHRNB2/CNGB1/COPS3/CRB1/CREB1/CREBBP/CRIP1/CRTC1/CYP2R1/DBH/DCLRE1C/DDB2/DDHD2/DMC1/DNM2/DNMT3A/DRD1/DRD2/DRD3/DYNLRB1/EEF1D/EP300/ERCC1/ERCC2/ERCC4/ERCC6/ERCC8/EYA1/FBXL8/FBXO4/FECH/FNTA/FOXB1/GADD45A/GATA3/GNA11/GNAT1/GNAT2/GPR52/GPR…	171
GO:0009798	BP	GO:0009798	axis specification	42/5894	88/18866	0.000869258	0.0066967	0.0043977	AHI1/BMP4/BMPR1A/CDX1/CDX2/CER1/CITED1/CTNNB1/CXXC4/EPB41L5/ETS2/FRS2/FZD5/GDF3/GPC3/HEY2/IRX4/LHX1/LRP6/MDFI/MNS1/NEUROG1/NOTCH1/PAX6/PTCH1/SHH/SIX2/SIX3/SKI/SMAD2/SMAD4/SMAD6/SMO/SRF/TBX3/TMED2/VAX2/WNT1/WNT5A/WNT6/WNT7A/WT1	42
GO:0046889	BP	GO:0046889	positive regulation of lipid biosynthetic process	42/5894	88/18866	0.000869258	0.0066967	0.0043977	ABCD1/ABCD2/ABHD6/ADM/AGAP2/APOA4/AVP/AVPR1A/BMP6/CD74/CGA/CREB1/CREBL2/CTDNEP1/CYP7A1/FABP3/FGF1/FSHB/GPLD1/HTR2A/HTR2B/HTR2C/IFNG/IL1B/INS/LDLR/MID1IP1/MLXIPL/MTOR/NR1H2/NR1H4/PLA2G3/PLA2G6/PRKAA1/PTGS2/RAB38/SIRT4/SPHK2/STAR/TNF/TNFRSF1A/WNT4	42
GO:0061614	BP	GO:0061614	pri-miRNA transcription by RNA polymerase II	28/5894	53/18866	0.000870429	0.00669775	0.00439839	BMP2/BMP4/BMPR1A/ETS1/FOSL1/GATA3/HDAC4/NGFR/NR3C1/PDGFB/PPARA/PPARD/PPARG/PRL/RELA/SMAD3/SMAD4/SMAD6/SMARCA4/SOX9/SREBF2/SRF/STAT3/TERT/TGFB2/TNF/TP53/WT1	28
GO:0002029	BP	GO:0002029	desensitization of G protein-coupled receptor signaling pathway	14/5894	21/18866	0.000887907	0.00675977	0.00443912	ADM/ADRB2/APLNR/ARR3/DNM2/DRD2/DRD3/GIPR/GRK4/HTR1B/HTR2B/NECAB2/SAG/UBQLN2	14
GO:0003177	BP	GO:0003177	pulmonary valve development	14/5894	21/18866	0.000887907	0.00675977	0.00443912	BMP4/BMPR2/GJA5/HEY2/HEYL/JAG1/NFATC1/NOS3/NOTCH1/RBPJ/ROBO1/SMAD6/TGFB2/TNFRSF1A	14
GO:0022401	BP	GO:0022401	negative adaptation of signaling pathway	14/5894	21/18866	0.000887907	0.00675977	0.00443912	ADM/ADRB2/APLNR/ARR3/DNM2/DRD2/DRD3/GIPR/GRK4/HTR1B/HTR2B/NECAB2/SAG/UBQLN2	14
GO:0032616	BP	GO:0032616	interleukin-13 production	14/5894	21/18866	0.000887907	0.00675977	0.00443912	GATA3/HLA-E/IFNA2/IL25/IL4/IRF4/LGALS9/LILRA5/NLRP3/PRKCZ/RARA/SCGB1A1/SPHK2/TNFRSF21	14
GO:0033630	BP	GO:0033630	positive regulation of cell adhesion mediated by integrin	14/5894	21/18866	0.000887907	0.00675977	0.00443912	ADAM9/CCL21/CCL5/CD3E/CIB1/FOXC2/IFT74/LIF/NCKAP1L/RAC3/RET/SKAP1/SYK/TGFB2	14
GO:0035929	BP	GO:0035929	steroid hormone secretion	14/5894	21/18866	0.000887907	0.00675977	0.00443912	AGT/AGTR2/BMP6/C1QTNF1/CRH/CRHR1/GAL/GALR1/GDF9/POMC/PTPN11/REN/RETN/TAC1	14
GO:0046827	BP	GO:0046827	positive regulation of protein export from nucleus	14/5894	21/18866	0.000887907	0.00675977	0.00443912	BAG3/EMD/GAS6/IL1B/MDM2/PPM1A/PRKACA/RBM22/RIOK2/SFN/TCF7L2/TP53/TPR/YWHAE	14
GO:0060065	BP	GO:0060065	uterus development	14/5894	21/18866	0.000887907	0.00675977	0.00443912	ASH1L/CYP19A1/ESR1/GATA3/GREB1L/KDM5B/LHX1/NIPBL/RBP4/SMAD4/SRC/TGFB2/WNT5A/WNT7A	14
GO:1902656	BP	GO:1902656	calcium ion import into cytosol	14/5894	21/18866	0.000887907	0.00675977	0.00443912	ATP2B4/CACNA2D1/CALCR/FAM155A/FAM155B/FYN/RAMP3/SLC24A1/SLC24A2/SLC8A1/TRPM2/TRPV4/TRPV5/TRPV6	14
GO:0042102	BP	GO:0042102	positive regulation of T cell proliferation	47/5894	101/18866	0.000888922	0.00675977	0.00443912	AGER/AIF1/CCL5/CCR2/CD1D/CD209/CD28/CD3E/CD40LG/CD46/CD6/CD70/EBI3/EPO/FOXP3/HES1/HHLA2/HLA-DMB/HLA-DPA1/HLA-DPB1/HLA-E/IGFBP2/IL12B/IL12RB1/IL15/IL1B/IL21/IL23A/IL4/IL6/JAK3/LEP/LGALS9/NCK1/NCKAP1L/PDCD1LG2/PNP/PRKCQ/PTPN22/PYCARD/SHH/SPTA1/STAT5B/SYK/TNFSF9/TRAF6/VTCN1	47
GO:0002705	BP	GO:0002705	positive regulation of leukocyte mediated immunity	61/5894	138/18866	0.000893463	0.00678634	0.00445657	AP1G1/BTK/C3/CD160/CD177/CD1B/CD1D/CD226/CD28/CRTAM/DDX1/F2RL1/FGR/FOXP3/FZD5/GATA3/HLA-E/HPX/IL12B/IL12RB1/IL13/IL18R1/IL18RAP/IL1B/IL1R1/IL21/IL23A/IL4/IL4R/IL6/KIR2DL4/LAG3/LAMP1/LTA/MALT1/MAP3K7/MAVS/MLH1/MR1/NCR3/NLRP3/NOS2/NPPA/P2RX7/PLA2G3/PRKCZ/PTAFR/PVR/SH2D1A/SLC22A13/SPHK2/STAT5B/STAT6/STX4/STXBP1/SYK/TBX21/TNF/TRAF6/VAMP7/VAV1	61
GO:2000243	BP	GO:2000243	positive regulation of reproductive process	40/5894	83/18866	0.00089943	0.00682366	0.00448108	ACVR1B/C1QBP/CCDC87/CCR6/CIB1/CTNNB1/DAZL/DEFB1/DMRT1/GLRA1/HDAC2/HDAC4/HYAL3/INSR/LFNG/MSX1/NR5A1/OXT/OXTR/P2RY1/PDE3A/PLCB1/PRDM14/PRDM9/PTAFR/RETN/SEMA3A/SHH/SIRT2/SOX9/SRC/SRY/SYDE1/TACR3/VIP/WNT4/WNT5A/WT1/ZFPM2/ZNF711	40
GO:0021885	BP	GO:0021885	forebrain cell migration	30/5894	58/18866	0.000913436	0.00692182	0.00454553	CDK5R1/CDK5R2/CNTN2/CTNNB1/DAB1/DISC1/DRD1/DRD2/EFHC1/EMX2/FEZF2/FGF13/FOXB1/FOXG1/HTR6/LHX6/MBOAT7/NDEL1/NKX2-1/NR2E1/PAFAH1B1/POU3F2/POU3F3/PSEN1/ROBO1/RTN4/SRF/SUN1/SYNE2/TNR	30
GO:0007050	BP	GO:0007050	cell cycle arrest	96/5894	234/18866	0.000923729	0.00696427	0.00457341	ABL1/AKT2/APBB1/APC/ATM/BARD1/BIN1/BRINP1/BRINP2/BRINP3/BTG4/CCND1/CDC14A/CDK5R1/CDK9/CDKN1A/CDKN1B/CDKN1C/CDKN2A/CDKN2B/CDKN2C/CDKN2D/CGREF1/CNOT2/CNOT4/CNOT6/CNOT7/CRLF3/E2F8/EIF4G2/EP300/ERN1/ERN2/EVI2B/FOXE3/FOXO4/FZD9/GADD45A/GADD45GIP1/GAS2L1/GML/HRAS/ID2/IFNG/IFNW1/IL12B/ING4/INHA/INSM1/LAMTOR2/LAMTOR5/MAGI2/MAP2K6/MCPH1/MDM2/MDM4/MED25/MIF/MLXIPL/MTOR/MYOG/NOTCH1/PCBP4/PHOX2B/PIDD1/PKD2/P…	96
GO:0006482	BP	GO:0006482	protein demethylation	19/5894	32/18866	0.000924413	0.00696427	0.00457341	HR/HSF4/JARID2/JMJD6/KDM2A/KDM3A/KDM3B/KDM4C/KDM4D/KDM5A/KDM5B/KDM5C/KDM5D/KDM6B/KDM7A/KDM8/PHF2/PHF8/UTY	19
GO:0008214	BP	GO:0008214	protein dealkylation	19/5894	32/18866	0.000924413	0.00696427	0.00457341	HR/HSF4/JARID2/JMJD6/KDM2A/KDM3A/KDM3B/KDM4C/KDM4D/KDM5A/KDM5B/KDM5C/KDM5D/KDM6B/KDM7A/KDM8/PHF2/PHF8/UTY	19
GO:0032350	BP	GO:0032350	regulation of hormone metabolic process	19/5894	32/18866	0.000924413	0.00696427	0.00457341	ADM/ARNT/ATP1A1/BMP2/BMP5/BMP6/DGKQ/GAL/GATA3/GNB3/H6PD/HPN/PAX8/REST/SLCO1C1/STUB1/TCF7L2/WNT4/ZMPSTE24	19
GO:0086019	BP	GO:0086019	cell-cell signaling involved in cardiac conduction	19/5894	32/18866	0.000924413	0.00696427	0.00457341	CACNA1C/CACNA1D/CACNA1G/CACNA2D1/CXADR/FLNA/GJA1/GJA5/HCN4/KCNJ3/KCNJ5/KCNN2/PKP2/RANGRF/SCN10A/SCN1B/SCN3B/SCN5A/TRPM4	19
GO:0002285	BP	GO:0002285	lymphocyte activation involved in immune response	79/5894	187/18866	0.000927787	0.00696475	0.00457372	ABL1/AP1G1/APBB1IP/BATF/CCR6/CD28/CD40LG/CD46/CD74/CDH17/DOCK10/ERCC1/F2RL1/FCGR2B/FOXP3/GATA3/GPR183/HLA-DMB/IFNA1/IFNA10/IFNA14/IFNA16/IFNA17/IFNA2/IFNA4/IFNA5/IFNA7/IFNA8/IFNB1/IFNG/IFNW1/IL12B/IL12RB1/IL18R1/IL21/IL23A/IL4/IL4R/IL6/IRF4/ITFG2/JAK3/LAMP1/LCP1/LFNG/LGALS9/LIG4/MALT1/MLH1/MTOR/MYB/NDFIP1/NLRP3/PARP3/PCK1/PGLYRP1/PLCL2/PRKCZ/PSEN1/PTGER4/PTK2B/RARA/RC3H1/RC3H2/RNF8/SEMA4A/SOCS5/S…	79
GO:0003337	BP	GO:0003337	mesenchymal to epithelial transition involved in metanephros morphogenesis	10/5894	13/18866	0.000929851	0.00696475	0.00457372	BMP4/CITED1/CTNNB1/GDNF/LIF/PAX2/PAX8/SALL1/SIX2/SMO	10
GO:0035723	BP	GO:0035723	interleukin-15-mediated signaling pathway	10/5894	13/18866	0.000929851	0.00696475	0.00457372	GRB2/IL15/IL2RB/IL2RG/JAK1/JAK3/PLCB1/STAT3/STAT5A/STAT5B	10
GO:0071350	BP	GO:0071350	cellular response to interleukin-15	10/5894	13/18866	0.000929851	0.00696475	0.00457372	GRB2/IL15/IL2RB/IL2RG/JAK1/JAK3/PLCB1/STAT3/STAT5A/STAT5B	10
GO:2000194	BP	GO:2000194	regulation of female gonad development	10/5894	13/18866	0.000929851	0.00696475	0.00457372	GDF9/GNRH1/HYAL3/INSR/NR5A1/NUPR1/RETN/SRC/WT1/ZFPM2	10
GO:0002287	BP	GO:0002287	alpha-beta T cell activation involved in immune response	32/5894	63/18866	0.000937249	0.00700396	0.00459948	BATF/FOXP3/GATA3/GPR183/IFNG/IL12B/IL12RB1/IL18R1/IL21/IL23A/IL4/IL4R/IL6/IRF4/JAK3/LGALS9/MALT1/MTOR/MYB/NLRP3/PRKCZ/PTGER4/RARA/RC3H1/RC3H2/SEMA4A/SOCS5/SPN/STAT3/STAT6/TBX21/ZBTB7B	32
GO:0002293	BP	GO:0002293	alpha-beta T cell differentiation involved in immune response	32/5894	63/18866	0.000937249	0.00700396	0.00459948	BATF/FOXP3/GATA3/GPR183/IFNG/IL12B/IL12RB1/IL18R1/IL21/IL23A/IL4/IL4R/IL6/IRF4/JAK3/LGALS9/MALT1/MTOR/MYB/NLRP3/PRKCZ/PTGER4/RARA/RC3H1/RC3H2/SEMA4A/SOCS5/SPN/STAT3/STAT6/TBX21/ZBTB7B	32
GO:0045862	BP	GO:0045862	positive regulation of proteolysis	144/5894	370/18866	0.000938669	0.00700431	0.00459971	ADAM9/ADRA2A/AGER/APAF1/ARIH1/ARIH2/ATXN3/AURKAIP1/BAD/BAG2/BAG6/BBS7/BCL2L10/BCL2L13/CAPN3/CARD8/CASP1/CASP8/CAV1/CAV3/CBFA2T3/CCDC22/CCK/CEBPA/CHFR/CLDN3/CLEC7A/CLN6/CLPX/CNTN2/CR1/CSNK1A1/CSNK1D/CSNK1E/CYCS/DAPK1/DDA1/DDX3X/DET1/DISC1/DNAJB2/EDEM1/EFNA3/EGF/EGLN3/EIF2AK3/EPHA4/F12/F3/FASLG/FBXO22/FGFR4/FYN/FZR1/GPLD1/GRAMD4/GRIN1/GRIN2A/GRIN2B/GSK3A/HDAC2/HIP1R/HPN/IFNG/IFT57/IL1B/IST1/LGALS9/…	144
GO:0072078	BP	GO:0072078	nephron tubule morphogenesis	36/5894	73/18866	0.000939458	0.00700431	0.00459971	AGT/AGTR2/AHI1/BCL2/BMP2/BMP4/CITED1/CTNNB1/DCHS1/DLG1/EYA1/FGF1/FGF8/GATA3/GDNF/GPC3/GREB1L/HES1/KLHL3/LHX1/PAX2/PAX8/PKD2/PTCH1/SALL1/SHH/SIX2/SMAD4/SMO/SOX9/WNT1/WNT11/WNT2B/WNT4/WNT6/WT1	36
GO:0050766	BP	GO:0050766	positive regulation of phagocytosis	34/5894	68/18866	0.000944937	0.00700795	0.00460209	ABCA7/APOA2/APPL2/BCR/C3/CCL2/CD36/CD47/CLEC7A/DNM2/DOCK2/F2RL1/FCGR2B/GAS6/IFNG/IL15/IL1B/IL2RB/IL2RG/ITGA2/LRP1/MBL2/NCKAP1L/PPARG/PTPRJ/PTX3/PYCARD/RAPGEF1/SFTPD/SIRPB1/SIRPG/SOD1/TNF/TUB	34
GO:0099072	BP	GO:0099072	regulation of postsynaptic membrane neurotransmitter receptor levels	34/5894	68/18866	0.000944937	0.00700795	0.00460209	ADAM22/ARC/CACNG2/CACNG3/CACNG4/CACNG5/CALY/DAG1/DLG1/DLG4/DNM2/DNM3/DRD3/DRD4/EFNB2/EPS8/FLOT2/GHSR/GPC4/GPHN/GRIP1/GRIP2/HPCA/HRAS/IQSEC2/ITGB3/MAPK10/OPHN1/PRKCZ/SCRIB/SNAP25/STX3/VPS35/YWHAE	34
GO:0032011	BP	GO:0032011	ARF protein signal transduction	13/5894	19/18866	0.000945353	0.00700795	0.00460209	ARFGEF2/CYTH2/CYTH3/CYTH4/GBF1/IQSEC1/IQSEC2/IQSEC3/MAP4K4/MAPRE2/PSD/PSD3/PSD4	13
GO:0032012	BP	GO:0032012	regulation of ARF protein signal transduction	13/5894	19/18866	0.000945353	0.00700795	0.00460209	ARFGEF2/CYTH2/CYTH3/CYTH4/GBF1/IQSEC1/IQSEC2/IQSEC3/MAP4K4/MAPRE2/PSD/PSD3/PSD4	13
GO:0072077	BP	GO:0072077	renal vesicle morphogenesis	13/5894	19/18866	0.000945353	0.00700795	0.00460209	BMP4/CITED1/CTNNB1/GDNF/LHX1/LIF/PAX2/PAX8/SALL1/SIX2/SMO/SOX9/WNT4	13
GO:0006165	BP	GO:0006165	nucleoside diphosphate phosphorylation	59/5894	133/18866	0.000965738	0.00715088	0.00469596	AAAS/AK1/AK5/ALDOA/ALDOC/ARNT/BPGM/CBFA2T3/EIF6/ENO3/EP300/ESRRB/GAPDH/GAPDHS/GCK/GPD1/GPI/HDAC4/HKDC1/HTR2A/IFNG/INS/INSR/MLXIPL/MYOG/NME3/NME7/NUP188/NUP214/NUP54/NUP88/NUP98/NUPR1/OGDH/OGDHL/OGT/P2RX7/PFKFB1/PFKFB3/PFKFB4/PFKL/PFKP/PGAM1/PGK1/PGK2/PKLR/POM121/PPARA/PRKAA1/PRKAG2/PSEN1/RANBP2/SEC13/SEH1L/SIRT6/SLC4A1/STAT3/TPI1/TPR	59
GO:0016054	BP	GO:0016054	organic acid catabolic process	113/5894	282/18866	0.000969134	0.00715678	0.00469983	AASS/ABCB11/ABCD1/ABCD2/ABCD4/ABHD2/ABHD3/ACAD10/ACADL/ACADS/ACAT2/ACOT8/ACOXL/ADIPOQ/ADTRP/AGXT/AHCY/AKR1D1/AKT2/ALDH1L1/ALDH5A1/ALDH8A1/ASRGL1/ATP2B4/AUH/BCAT2/BCKDK/CD44/CEL/CPT1A/CRABP1/CTH/CYP26B1/CYP2W1/CYP4A11/CYP4F2/CYP4F3/DAO/DBT/DCXR/DECR2/DLD/DLST/ECH1/ECHDC1/ECI1/ECI2/ENOSF1/ETFA/ETFB/FAAH/FABP1/FAH/FTCD/GAD1/GAD2/GLS2/GLUD1/GLUD2/GPT/GSTZ1/HADH/HAL/HAO1/HAO2/HDC/HPD/HSD17B10/HYAL1/HY…	113
GO:0046395	BP	GO:0046395	carboxylic acid catabolic process	113/5894	282/18866	0.000969134	0.00715678	0.00469983	AASS/ABCB11/ABCD1/ABCD2/ABCD4/ABHD2/ABHD3/ACAD10/ACADL/ACADS/ACAT2/ACOT8/ACOXL/ADIPOQ/ADTRP/AGXT/AHCY/AKR1D1/AKT2/ALDH1L1/ALDH5A1/ALDH8A1/ASRGL1/ATP2B4/AUH/BCAT2/BCKDK/CD44/CEL/CPT1A/CRABP1/CTH/CYP26B1/CYP2W1/CYP4A11/CYP4F2/CYP4F3/DAO/DBT/DCXR/DECR2/DLD/DLST/ECH1/ECHDC1/ECI1/ECI2/ENOSF1/ETFA/ETFB/FAAH/FABP1/FAH/FTCD/GAD1/GAD2/GLS2/GLUD1/GLUD2/GPT/GSTZ1/HADH/HAL/HAO1/HAO2/HDC/HPD/HSD17B10/HYAL1/HY…	113
GO:0031076	BP	GO:0031076	embryonic camera-type eye development	22/5894	39/18866	0.000976826	0.00715678	0.00469983	ALDH1A2/ARID1A/FOXF2/FRS2/FZD5/IFT122/IFT140/LRP6/NES/PAX2/PAX6/PROX1/RARA/SIX3/SP3/TBX2/TFAP2A/TH/TRAF3IP1/WDR19/WNT16/WNT5A	22
GO:0050775	BP	GO:0050775	positive regulation of dendrite morphogenesis	22/5894	39/18866	0.000976826	0.00715678	0.00469983	ACTR2/ANAPC2/ANKRD27/CAMK2B/CAPRIN1/CDKL3/CDKL5/CUL7/CUX2/DBN1/DNM1L/EPHA4/FBXO31/ITPKA/KALRN/OBSL1/PAFAH1B1/PAK3/PARP6/PTPRD/RAB21/VAMP7	22
GO:0060416	BP	GO:0060416	response to growth hormone	22/5894	39/18866	0.000976826	0.00715678	0.00469983	ASS1/CPS1/CSH1/F7/GDF15/GH1/GH2/GHR/GHSR/IGFBP5/JAK3/PHEX/PRL/PRLR/PTPN1/SLC34A1/SOCS2/STAR/STAT3/STAT5A/STAT5B/STAT6	22
GO:0007158	BP	GO:0007158	neuron cell-cell adhesion	12/5894	17/18866	0.000981251	0.00715678	0.00469983	ASTN1/ASTN2/CDK5R1/CEL/NCAM2/NINJ2/NLGN3/NLGN4X/NLGN4Y/NRXN2/RET/TNR	12
GO:0061687	BP	GO:0061687	detoxification of inorganic compound	12/5894	17/18866	0.000981251	0.00715678	0.00469983	ABCC2/MT1E/MT1F/MT1G/MT1H/MT1HL1/MT1M/MT1X/MT2A/MT3/MT4/SLC30A1	12
GO:2000136	BP	GO:2000136	regulation of cell proliferation involved in heart morphogenesis	12/5894	17/18866	0.000981251	0.00715678	0.00469983	BMP10/BMP4/BMPR2/CTNNB1/EYA1/HAND2/HES1/ISL1/NOTCH1/RBPJ/SMAD4/SOX9	12
GO:0006094	BP	GO:0006094	gluconeogenesis	43/5894	91/18866	0.000981451	0.00715678	0.00469983	ADIPOQ/ALDOA/ALDOC/ARPP19/ATF4/C1QTNF3/DGKQ/ENO3/EP300/FOXO1/G6PC2/G6PC3/GAPDH/GAPDHS/GCG/GCK/GNMT/GPD1/GPD2/GPI/GPT/INS/LEP/MDH1/MDH2/MST1/OGT/PCK1/PFKFB1/PGAM1/PGK1/PGK2/PGP/PPARA/RANBP2/RBP4/SLC25A1/SLC25A10/SLC25A11/SLC25A12/SLC37A4/SOGA1/TPI1	43
GO:0042475	BP	GO:0042475	odontogenesis of dentin-containing tooth	43/5894	91/18866	0.000981451	0.00715678	0.00469983	ACVR2B/ADM/AMBN/AMELX/ANKRD11/ATF2/BMP2/BMP4/BMPR1A/CA2/CSF1/CSF3R/CTNNB1/DMP1/EDA/EDAR/FGF4/FGF8/FOXC1/FOXO1/HAND1/HAND2/HDAC2/KLK5/LRP4/LRP6/MMP20/MSX1/NGFR/ODAM/PERP/PPARA/RUNX2/SCN10A/SCN5A/SHH/SLC34A1/SMO/SOSTDC1/TBX1/TNFRSF11B/TRAF6/WNT6	43
GO:0009415	BP	GO:0009415	response to water	11/5894	15/18866	0.000982	0.00715678	0.00469983	AQP2/ATF2/ATP2B4/AVPR1A/CD9/MAPK10/NTRK1/PKD2/PKD2L1/SIPA1/TH	11
GO:0014048	BP	GO:0014048	regulation of glutamate secretion	11/5894	15/18866	0.000982	0.00715678	0.00469983	ADORA1/AVP/AVPR1A/CCK/HRH3/NPY5R/NTSR1/P2RX7/RAB3GAP1/STXBP1/TRH	11
GO:0030238	BP	GO:0030238	male sex determination	11/5894	15/18866	0.000982	0.00715678	0.00469983	DMRT1/FGF9/GNRH1/INSR/INSRR/NR0B1/NR5A1/PTGDR/SF1/SOX9/SRY	11
GO:0042976	BP	GO:0042976	activation of Janus kinase activity	11/5894	15/18866	0.000982	0.00715678	0.00469983	AGT/CCL5/GH1/GHR/IL12B/IL23A/IL4/IL6R/PIBF1/PRLR/PTK2B	11
GO:0007584	BP	GO:0007584	response to nutrient	73/5894	171/18866	0.00100407	0.00730941	0.00480006	AACS/ACSL1/ADIPOQ/AGL/AHCY/ALDH1A2/ALPL/AMELX/APAF1/ASCL1/ASS1/CASR/CCND1/CD3E/CDKN2B/CDKN2D/COX4I1/CYP26B1/DAD1/DNMT3A/EEF2/EPO/ERCC1/F7/FES/FKBP1B/GAS6/GATA4/GCGR/GIPR/GNAI2/GSTP1/HMGCS1/IGFBP2/IL15/ITGA2/LEP/LTA/MDM2/MTHFR/MTOR/NNT/NQO1/NR1H4/OGG1/OGT/OTC/PDX1/PEMT/PENK/PHEX/PKLR/PPARD/PPARG/PTEN/PTGS2/PTH/RARA/RELA/SERPINC1/SLC34A1/SLC8A1/SRF/STAR/TNFRSF11B/TNKS/TRIM24/TRIM25/TTPA/TYR/UCP3/US…	73
GO:0071346	BP	GO:0071346	cellular response to interferon-gamma	77/5894	182/18866	0.00101603	0.0073882	0.0048518	ACTR2/ACTR3/ADAMTS13/AIF1/AQP4/ASS1/CAMK2A/CAMK2B/CASP1/CCL1/CCL11/CCL13/CCL16/CCL2/CCL21/CCL23/CCL24/CCL25/CCL5/CD44/CD47/CD58/CDC42/CDC42EP2/CIITA/CX3CL1/DAPK1/EDN1/FASLG/FCGR1A/GAPDH/GBP2/HLA-DPA1/HLA-DPB1/HLA-DQA1/HLA-DQB1/HLA-DRA/HLA-DRB4/HLA-E/HPX/IFNG/IFNGR2/IL12B/IL12RB1/IRF2/IRF4/IRF5/JAK1/KIF16B/KIF5B/LGALS9/MID1/MT2A/MYO1C/NOS2/NR1H2/OAS1/PDE12/PPARG/PTAFR/STAR/STX4/STX8/STXBP1/STXBP2/…	77
GO:1902893	BP	GO:1902893	regulation of pri-miRNA transcription by RNA polymerase II	27/5894	51/18866	0.0010261	0.00745305	0.00489439	BMP2/BMP4/BMPR1A/ETS1/FOSL1/GATA3/HDAC4/NGFR/NR3C1/PDGFB/PPARA/PPARD/PPARG/PRL/RELA/SMAD3/SMAD6/SMARCA4/SOX9/SREBF2/SRF/STAT3/TERT/TGFB2/TNF/TP53/WT1	27
GO:0007271	BP	GO:0007271	synaptic transmission	cholinergic	18/5894	30/18866	0.0010601	0.00768278	0.00504525	ACHE/CHRM3/CHRNA1/CHRNA10/CHRNA2/CHRNA3/CHRNA6/CHRNB1/CHRNB2/CHRNB3/CHRNB4/CHRNE/CHRNG/COLQ/NQO1/RAPSN/SLC5A7/TAC1	18
GO:0019098	BP	GO:0019098	reproductive behavior	18/5894	30/18866	0.0010601	0.00768278	0.00504525	AVP/AVPR1A/BRINP1/DBH/DRD1/DRD5/GRIN1/HDAC2/HDAC4/KALRN/MAPK8IP2/MTNR1A/NPAS1/OXT/OXTR/PTEN/TH/THRA	18
GO:0046488	BP	GO:0046488	phosphatidylinositol metabolic process	78/5894	185/18866	0.0010659	0.00770752	0.0050615	AGAP2/ARF3/ATM/BPNT1/CDIPT/CHRM5/CISH/CSF1R/DPM3/EFR3B/GALR2/GPLD1/HTR2A/HTR2B/HTR2C/IMPA1/INPP4B/INPP5B/INPP5J/INPP5K/IP6K2/ITPKA/ITPKB/MBOAT7/MPPE1/MTM1/MTMR1/MTMR11/MTMR12/MTMR6/MTMR7/MTMR9/OCRL/PDGFB/PGAP2/PI4KA/PI4KB/PIGA/PIGB/PIGG/PIGK/PIGL/PIGP/PIGQ/PIGV/PIGZ/PIK3C3/PIK3CB/PIK3CG/PIK3R2/PIK3R5/PIKFYVE/PIP4K2A/PIP4K2B/PIP4K2C/PIP5K1A/PITPNM1/PLA2G2A/PLA2G2D/PLA2G2E/PLA2G2F/PLA2G3/PLA2G4A/PL…	78
GO:2001257	BP	GO:2001257	regulation of cation channel activity	78/5894	185/18866	0.0010659	0.00770752	0.0050615	ACTN2/ADRB2/ARC/CACNA2D1/CACNB1/CACNB3/CACNG2/CACNG3/CACNG4/CACNG5/CASQ1/CAV1/CCL2/CCR2/CLIC2/CNIH3/CRH/CRHBP/CRHR1/DAPK1/DLG1/DLG4/DRD2/DRD3/DRD4/DYSF/EPO/FGF12/FGF13/FKBP1B/GAL/GALR2/GRIA1/GRIA2/GRIA3/GRIA4/GRIN1/GRIN2A/GRIN2B/GSTM2/HAP1/HPCA/IFNG/JPH3/KCNA1/KCNC1/KCNC2/KCNE1/KCNE4/KCNG1/KCNIP2/KCNS1/KIF5B/MAPK8IP2/MINK1/MTNR1B/NLGN3/NOS1/NPPA/NTSR1/OPRL1/OPRM1/PDE4B/PDE4D/PKD2/PLA2G6/PRKACA/PT…	78
GO:0034976	BP	GO:0034976	response to endoplasmic reticulum stress	117/5894	294/18866	0.00107201	0.00774313	0.00508489	ALOX15/ALOX5/ANKZF1/APAF1/ATF4/ATF6/ATF6B/ATG10/ATP2A1/ATP2A2/ATP6V0D1/ATXN3/BAG6/BCL2/BCL2L1/BRSK2/CANX/CASP4/CAV1/CCDC47/CCL2/CCND1/CLGN/CREB3/CREB3L1/CTDSP2/CTH/CUL7/CXXC1/DCTN1/DDX3X/DERL2/DNAJB12/DNAJB14/DNAJB2/DNAJB9/DNAJC3/EDEM1/EEF2/EIF2AK3/EP300/ERLIN2/ERN1/ERN2/ERP29/EXTL1/FAF2/FBXO17/FBXO2/FCGR2B/FICD/GFPT1/GORASP2/GOSR2/GSK3A/HYOU1/IGFBP1/KLHDC3/LPCAT3/MAN1B1/MANF/MAP3K5/MBTPS2/NCK1/N…	117
GO:0086065	BP	GO:0086065	cell communication involved in cardiac conduction	29/5894	56/18866	0.0010784	0.00778059	0.00510949	ATP1A1/CACNA1C/CACNA1D/CACNA1G/CACNA2D1/CAV1/CTNNA3/CXADR/DSP/FKBP1B/FLNA/GJA1/GJA5/HCN4/JUP/KCNJ3/KCNJ5/KCNN2/PDE4D/PKP2/PRKACA/RANGRF/SCN10A/SCN1B/SCN3B/SCN5A/SLC8A1/TRDN/TRPM4	29
GO:0009583	BP	GO:0009583	detection of light stimulus	37/5894	76/18866	0.0010892	0.00784978	0.00515492	ABCA4/AIPL1/ATP8A2/BEST1/CACNA1F/CAMKMT/CEP250/CNGB1/CRB1/FNTA/GNA11/GNAT1/GNAT2/GPR52/GPR88/GRK1/GRK4/GRM6/GUCA1B/GUCY2F/METAP1/NMT2/NR2E3/PDC/PDE6B/PDE6C/PDE6G/PITPNM1/PLEKHB1/PPEF1/RCVRN/RGR/RHO/RPE65/RRH/SAG/TRPC3	37
GO:0007043	BP	GO:0007043	cell-cell junction assembly	64/5894	147/18866	0.0010941	0.00787627	0.00517232	ACE/ACTB/ACTN4/AGT/APC/ARL2/ARVCF/CAV1/CD9/CDH10/CDH12/CDH18/CDH20/CDH5/CDH6/CDH7/CDH8/CDH9/CLDN14/CLDN16/CLDN3/CLDN6/CLDN8/CLDN9/CNTNAP1/CTNNB1/CTNND2/DCHS1/DLG1/DLG5/FZD5/GJA1/GJA4/GJA5/GJB1/GRHL2/HDAC7/HEG1/IKBKB/IL1B/JUP/LIM2/MYO1C/NPHP1/NPHP4/NR1H4/PARD6A/PARD6B/PECAM1/PKP1/PKP2/PKP4/PRKACA/PRKCA/PTPRO/RAB13/ROCK2/SNAI1/SRF/TBCD/TLN2/TNF/TRPV4/WNT11	64
GO:0019319	BP	GO:0019319	hexose biosynthetic process	44/5894	94/18866	0.00109975	0.00789066	0.00518177	ADIPOQ/ALDOA/ALDOC/ARPP19/ATF4/C1QTNF3/DGKQ/ENO3/EP300/FOXO1/G6PC2/G6PC3/GAPDH/GAPDHS/GCG/GCK/GNMT/GPD1/GPD2/GPI/GPT/INS/LEP/MDH1/MDH2/MST1/OGT/PCK1/PFKFB1/PGAM1/PGK1/PGK2/PGP/PPARA/RANBP2/RBP4/SLC25A1/SLC25A10/SLC25A11/SLC25A12/SLC37A4/SOGA1/SORD/TPI1	44
GO:0030641	BP	GO:0030641	regulation of cellular pH	44/5894	94/18866	0.00109975	0.00789066	0.00518177	ATP6AP1/ATP6AP2/ATP6V0A1/ATP6V0A2/ATP6V0D1/ATP6V0E2/ATP6V1A/ATP6V1B1/ATP6V1B2/ATP6V1E1/ATP6V1G1/ATP6V1H/AVP/AVPR1A/BCL2/CA2/CA7/CLN3/CLN5/CLN6/FASLG/MAFG/MAPK1/NOX1/RAB38/RAB7A/SLC26A3/SLC4A1/SLC4A10/SLC4A3/SLC4A5/SLC4A7/SLC4A8/SLC9A2/SLC9A3/SLC9A5/SLC9A6/SLC9A7/SLC9A8/TM9SF4/TMEM165/TTPA/UBE3A/VPS33A	44
GO:0045778	BP	GO:0045778	positive regulation of ossification	44/5894	94/18866	0.00109975	0.00789066	0.00518177	ACVR2B/ADRB2/ALOX5/ATP6AP1/BMP2/BMP4/BMP6/BMPR1A/BMPR1B/BMPR2/CEBPA/CEBPD/CLIC1/CTNNB1/FZD9/GDPD2/GNAS/HGF/IL6/IL6R/JAG1/LTF/NELL1/NIPBL/NPPC/OSR2/OXT/P2RX7/PDLIM7/PRKD1/PTH/PTPN11/RUNX2/SLC8A1/SMAD3/SMAD5/SUCO/TAC1/TFAP2A/TGFB2/TOB2/WNT10B/WNT4/WNT5A	44
GO:0043954	BP	GO:0043954	cellular component maintenance	31/5894	61/18866	0.00110705	0.00792549	0.00520464	BSN/C1QL1/CBLN1/CD177/CLDN3/CSF1R/CTBP2/DCTN1/DLG1/ERC2/F2RL1/FCGR2B/FYN/GRIN2B/HDAC2/INS/INSR/ITPKA/KIFC3/MTHFR/OPHN1/PARD6A/PCLO/PICK1/PRTN3/RAB3A/RASSF8/SUPT6H/VPS35/ZMYND8/ZNF804A	31
GO:0046888	BP	GO:0046888	negative regulation of hormone secretion	31/5894	61/18866	0.00110705	0.00792549	0.00520464	ADIPOQ/ADORA1/ADRA2A/BMP8A/CARTPT/CRH/CRHBP/DRD2/EDN1/FKBP1B/GHSR/GJA1/HADH/IL1B/INHA/KALRN/LEP/LIF/MTNR1B/NPFF/NPVF/OSM/PFKL/PPP3CA/PSMD9/PTPN11/RAB11FIP5/REST/SIRT4/STXBP5L/VSNL1	31
GO:0002292	BP	GO:0002292	T cell differentiation involved in immune response	35/5894	71/18866	0.0011089	0.00792995	0.00520757	BATF/CD46/FOXP3/GATA3/GPR183/IFNG/IL12B/IL12RB1/IL18R1/IL21/IL23A/IL4/IL4R/IL6/IRF4/JAK3/LGALS9/MALT1/MTOR/MYB/NLRP3/PCK1/PRKCZ/PTGER4/RARA/RC3H1/RC3H2/SEMA4A/SOCS5/SPN/STAT3/STAT6/TBX21/TSC1/ZBTB7B	35
GO:0032609	BP	GO:0032609	interferon-gamma production	52/5894	115/18866	0.00111191	0.00794276	0.00521599	AVPR2/C1QBP/CCR2/CD2/CD226/CD3E/CD47/CD96/CEBPG/CLEC7A/CRTAM/EBI3/F2RL1/FOXP3/FZD5/GAS6/GATA3/HLA-DPA1/HLA-DPB1/HMHB1/HRAS/IL12B/IL12RB1/IL12RB2/IL18R1/IL18RAP/IL1B/IL1R1/IL1RL1/IL21/IL23A/INHA/ISL1/ITK/LGALS9/LTA/NR1H4/PDCD1LG2/PDE4B/PDE4D/PGLYRP1/PTPN22/PYCARD/RARA/SCGB1A1/SCRIB/SPN/TLR7/TLR8/TNF/WNT5A/ZG16	52
GO:0007585	BP	GO:0007585	respiratory gaseous exchange by respiratory system	33/5894	66/18866	0.00111597	0.00795418	0.00522348	ADH5/ADORA1/BPGM/COX15/CSF2RB/DACH1/ECEL1/EDN1/ELN/FLT4/GLRA1/GRIN1/HOXA5/MAN1A2/MAN2A1/MECP2/MTG1/NDN/NLGN3/NTSR1/PASK/PHOX2A/PHOX2B/RAB3A/SFTPB/SFTPC/SFTPD/TAS2R4/TCF15/TLX3/TNNC1/UCP3/YWHAZ	33
GO:0034394	BP	GO:0034394	protein localization to cell surface	33/5894	66/18866	0.00111597	0.00795418	0.00522348	ABCA2/ABCA7/ACTN2/ANGPT1/ASTN2/BDNF/CAV3/CD177/CD247/CTNNB1/EGF/ERBB4/FLNA/GBF1/GGA1/GGA3/HFE/LEPROTL1/LRIG2/NEDD4L/PICALM/PIGK/PTPRU/RAB11B/RAB11FIP5/RANGRF/SMURF1/STX3/STX4/TM9SF4/TNF/TOR1A/WNT11	33
GO:0019218	BP	GO:0019218	regulation of steroid metabolic process	58/5894	131/18866	0.00112329	0.00799159	0.00524805	ABCA2/ABCB11/ACADL/ADM/AGT/APOA2/APOA4/ATP1A1/BMP2/BMP5/BMP6/CGA/CYP7A1/DGKQ/DKKL1/ERLIN2/FASN/FDFT1/FGF1/FGFR4/FSHB/GAL/GFI1/GGPS1/GNB3/H6PD/HMGCS1/IDI1/IFNG/IL1B/INSIG1/LDLR/LEP/LPCAT3/MBTPS2/MVD/NFKB1/NFYB/NFYC/NR0B1/NR1H4/NR5A1/PANK2/PRKAA1/PROX1/RAN/REST/SC5D/SF1/SNAI1/SOD1/SREBF2/STAR/STAT5B/STUB1/TNF/VDR/WNT4	58
GO:0006140	BP	GO:0006140	regulation of nucleotide metabolic process	55/5894	123/18866	0.00112368	0.00799159	0.00524805	AAAS/ARNT/CBFA2T3/EIF6/EP300/ESRRB/GAPDHS/GCK/GPD1/GSTZ1/GUCA1B/GUCA2B/HDAC4/HPCA/HTR2A/IFNG/IL4/INS/INSR/MLXIPL/MYOG/NOS1/NOS2/NOS3/NUP188/NUP214/NUP54/NUP88/NUP98/NUPR1/OGT/P2RX7/PDK3/PDPR/PDZD3/PFKFB1/PFKFB3/PFKFB4/PGAM1/POM121/PPARA/PRKAA1/PRKAG2/PSEN1/RANBP2/RCVRN/SEC13/SEH1L/SIRT6/SLC25A12/SLC4A1/SPHK2/STAT3/TMSB4X/TPR	55
GO:2000273	BP	GO:2000273	positive regulation of signaling receptor activity	21/5894	37/18866	0.00113934	0.00809408	0.00531535	ADORA1/ADRA2A/ADRA2B/ADRA2C/ADRB2/ARC/CACNG2/CACNG3/CACNG4/CCL2/CCR2/EGF/HFE/IFNG/NCF1/NCOA3/NEURL1/NLGN3/RGS9/TAL1/TGFA	21
GO:0001892	BP	GO:0001892	embryonic placenta development	42/5894	89/18866	0.00115417	0.00819045	0.00537864	ADM/ARNT/ASCL2/BMP5/CASP8/CDX2/CEBPA/CITED1/CSF2/DNAJB6/E2F8/EGLN1/EPAS1/FGFR2/FZD5/GCM1/GRB2/GRHL2/HAND1/HES1/HEY2/HS6ST1/KRT19/LIF/MAPK1/MDFI/OVOL2/PDGFB/PHLDA2/PKD2/PLG/RBPJ/SNAI1/SOX15/SP3/SPINT2/STK4/TFEB/TMED2/TTPA/VASH2/ZFP36L1	42
GO:0055002	BP	GO:0055002	striated muscle cell development	72/5894	169/18866	0.00115699	0.00820145	0.00538586	ACTA1/ACTN2/ADRA1A/AFG3L2/AGT/AGTR2/ALPK3/ANKRD1/ATG5/BCL2/BIN3/BMP10/BMP4/CAPN3/CASQ1/CAV3/CHRNB1/COMP/CSRP3/CTDP1/CXADR/DYSF/EDN1/FBXO22/FHOD3/GATA4/GPX1/GSK3A/HDAC4/HDAC9/HEY2/KEL/KRT19/MAML1/MTOR/MYF5/MYF6/MYH3/MYH6/MYL2/MYLK3/MYOD1/MYOF/MYOG/MYOZ2/NKX2-5/NPPA/NRAP/OBSCN/OBSL1/PIN1/PPARA/PPP3CA/PROX1/PTCD2/RGS4/SDC1/SGCB/SKI/SLC8A1/SMAD4/SMO/SRF/TBX3/TCAP/TMOD2/TNNT1/TNNT2/TNNT3/TTN/WNT10B/ZM…	72
GO:0006650	BP	GO:0006650	glycerophospholipid metabolic process	134/5894	343/18866	0.00116292	0.00823447	0.00540754	ABHD3/ABHD4/ABHD6/ABHD8/ACHE/AGAP2/AGPAT1/AGPAT3/AGPAT4/ALOX15/ALPI/APOA2/APOA4/ARF3/ATM/BPNT1/CDIPT/CDS2/CEPT1/CETP/CHAT/CHKA/CHRM5/CISH/CLN3/CPNE6/CPNE7/CSF1R/CSNK2B/DDHD2/DGKE/DGKG/DGKH/DGKQ/DPM3/EFR3B/ENPP2/ETNK1/ETNK2/FABP3/FABP5/GALR2/GDE1/GPD1/GPLD1/HTR2A/HTR2B/HTR2C/IMPA1/INPP4B/INPP5B/INPP5J/INPP5K/IP6K2/ITPKA/ITPKB/LCAT/LDLR/LPCAT3/LPCAT4/MBOAT7/MECP2/MPPE1/MTM1/MTMR1/MTMR11/MTMR12/MTMR…	134
GO:0060041	BP	GO:0060041	retina development in camera-type eye	65/5894	150/18866	0.00116419	0.00823447	0.00540754	ACHE/ACVR2B/AHI1/ARHGEF15/ATP2B4/ATP8A2/BBS4/BMPR1B/BMPR2/CDON/CHD7/CRB1/CYP1B1/DIO3/DSCAM/GNAT1/GNAT2/GPM6A/GRM6/HPCA/JMJD6/LAMA1/LAMC3/LHX1/LRP6/MAN2A1/NAGLU/NDP/NEUROD4/NPHP1/NPHP4/NR2E1/NR2E3/NRL/OBSL1/PAX2/PAX6/PDE6B/PDE6C/POU4F2/PROX1/PRPH2/PSEN1/PTPRM/RBP4/RET/RHO/RORB/RPE65/RPGRIP1/SDK2/SIX3/SKI/SLC17A7/SLC4A5/SMARCA4/SOX9/TFAP2A/TGFB2/TOPORS/TRPM1/TUB/USH1C/VAX2/VSX1	65
GO:0007265	BP	GO:0007265	Ras protein signal transduction	135/5894	346/18866	0.00118418	0.00836672	0.0054944	ABL1/ADRA1A/ADRA2A/AIF1/APOC3/ARFGEF2/ARHGAP24/ARHGAP29/ARHGAP35/ARHGAP4/ARHGDIA/ARHGDIB/ARHGDIG/ARHGEF10/ARHGEF11/ARHGEF12/ARHGEF18/ARHGEF2/ARHGEF28/BCR/BRAP/CADM4/CBL/CDC42/CDC42EP1/CDC42EP2/CDC42SE1/CDKN1A/CDKN2A/CELSR1/CHUK/CRK/CRKL/CSF1/CYTH2/CYTH3/CYTH4/DENND4A/DNM2/DOK1/DOK2/DOK3/ELMO1/EPO/EPOR/EPS8/F2RL1/F2RL2/F2RL3/G3BP2/GBF1/GNA13/GPR17/GPR20/GPR65/GRAP/GRAP2/GRB2/HEG1/HRAS/IQSEC1/IQSEC…	135
GO:0097061	BP	GO:0097061	dendritic spine organization	40/5894	84/18866	0.00120463	0.00842673	0.00553381	ACTR2/ARC/ARHGAP33/CAMK2B/CAPRIN1/CDC42/CDK5R1/CTNND2/CUX2/DBN1/DLG4/DNM1L/DNM3/DOCK10/EPHA4/EPHB1/EPHB3/FCGR2B/FYN/GRIN2B/HDAC6/INS/INSR/ITPKA/KALRN/KIF1A/LGMN/NLGN3/PAFAH1B1/PAK3/PICK1/PPFIA2/PTEN/SHANK1/SIPA1L1/UBE3A/VPS35/WNT7A/ZMYND8/ZNF804A	40
GO:0034754	BP	GO:0034754	cellular hormone metabolic process	59/5894	134/18866	0.00120632	0.00842673	0.00553381	AANAT/ADH1A/ADH1C/ADM/AFP/AKR1B10/AKR1C4/AKR1D1/ALDH1A1/ALDH1A2/ALDH8A1/BMP2/BMP5/BMP6/COMT/CRABP1/CYP11B1/CYP11B2/CYP17A1/CYP19A1/CYP1A2/CYP1B1/CYP26B1/CYP2W1/CYP46A1/DGKQ/DHRS2/ESR1/FDX1/FDXR/FSHB/HSD17B1/HSD17B11/HSD17B12/HSD17B14/HSD17B2/HSD17B3/HSD17B6/HSD17B7/HSD17B8/HSD3B1/HSD3B2/LIPE/PLEKHA1/PNPLA2/RBP4/RDH16/RDH8/REST/RPE65/SCPEP1/SGPL1/SHH/SRD5A2/SRD5A3/STAR/STAT5B/SULT1A1/WNT4	59
GO:0006661	BP	GO:0006661	phosphatidylinositol biosynthetic process	53/5894	118/18866	0.00120918	0.00842673	0.00553381	AGAP2/ARF3/ATM/CDIPT/DPM3/HTR2A/HTR2B/HTR2C/IMPA1/INPP4B/INPP5J/INPP5K/MBOAT7/MPPE1/MTM1/MTMR1/MTMR12/MTMR6/MTMR7/MTMR9/OCRL/PDGFB/PGAP2/PI4KA/PI4KB/PIGA/PIGB/PIGG/PIGK/PIGL/PIGP/PIGQ/PIGV/PIGZ/PIK3C3/PIK3CB/PIK3CG/PIK3R2/PIK3R5/PIKFYVE/PIP4K2A/PIP4K2B/PIP4K2C/PIP5K1A/PITPNM1/PLEKHA1/PLEKHA2/PLEKHA4/PTEN/PTPN13/SBF1/SYNJ1/SYNJ2	53
GO:0021987	BP	GO:0021987	cerebral cortex development	53/5894	118/18866	0.00120918	0.00842673	0.00553381	ASCL1/ATOH1/BAD/BBS4/BTBD3/CCDC85C/CDH2/CDK5R1/CDK5R2/CDON/CRK/CRKL/CTNNB1/DAB1/DISC1/EFHC1/EMX1/EMX2/FGF13/FLNA/FOXG1/GRIN1/HTR6/LHX6/LRP1/LRP6/MBOAT7/MCPH1/NDEL1/NF1/NKX2-1/NR2E1/PAFAH1B1/PAX6/PHACTR1/PLCB1/POU3F2/POU3F3/PSEN1/PTPRS/ROBO1/RTN4/SLC38A2/SMO/SUN1/SYNE2/TBR1/TH/TMEM14B/TRAPPC9/TSC1/XAB2/YWHAE	53
GO:0030850	BP	GO:0030850	prostate gland development	26/5894	49/18866	0.00120986	0.00842673	0.00553381	BMP4/CDKN1B/CRIP1/CTNNB1/CYP19A1/CYP7B1/ESR1/FEM1B/FGFR2/FKBP4/FOXA1/FRS2/HOXB13/NOTCH1/PRLR/PTCH1/PTEN/RARA/RXRA/SERPINB5/SHH/SMARCC1/SOX9/STK11/UBE3A/WNT5A	26
GO:0002360	BP	GO:0002360	T cell lineage commitment	17/5894	28/18866	0.00121088	0.00842673	0.00553381	BATF/BCL2/CYLD/FOXP3/IL12B/IL12RB1/IL23A/IL6/IRF4/MTOR/RAG2/SHH/SPN/STAT3/STAT6/TBX21/TP53	17
GO:0003180	BP	GO:0003180	aortic valve morphogenesis	17/5894	28/18866	0.00121088	0.00842673	0.00553381	BMP4/ELN/EMILIN1/GATA3/GATA4/HEY2/HEYL/JAG1/NFATC1/NOS3/NOTCH1/RB1/ROBO1/ROCK2/SMAD6/SNAI1/SOX9	17
GO:0030194	BP	GO:0030194	positive regulation of blood coagulation	17/5894	28/18866	0.00121088	0.00842673	0.00553381	APOH/CD36/CPB2/DMTN/ENPP4/F12/F2/F3/F7/HRG/NFE2L2/PLA2G4A/PLG/PRDX2/SELP/SERPINF2/THBD	17
GO:0042745	BP	GO:0042745	circadian sleep/wake cycle	17/5894	28/18866	0.00121088	0.00842673	0.00553381	ADORA1/ADRB1/AHCY/CHRNB2/CRH/CSF2/DRD2/DRD3/GHRH/GHRHR/HCRTR2/KCNA2/MTNR1B/NPY2R/PER3/STAR/TH	17
GO:0045745	BP	GO:0045745	positive regulation of G protein-coupled receptor signaling pathway	17/5894	28/18866	0.00121088	0.00842673	0.00553381	C3/CNTN2/DRD2/F2/FGF8/GPR27/GSK3A/KLK14/KLK5/NECAB2/NOS1/PDE6G/PDE6H/PRKCA/PTGDR2/TMOD2/UBQLN2	17
GO:0071880	BP	GO:0071880	adenylate cyclase-activating adrenergic receptor signaling pathway	17/5894	28/18866	0.00121088	0.00842673	0.00553381	ADCY9/ADRA1A/ADRA1B/ADRA2A/ADRA2B/ADRA2C/ADRB1/ADRB2/ADRB3/ATP2B4/DRD1/DRD2/DRD3/DRD5/GNAI2/NOS1/PDE4D	17
GO:1900048	BP	GO:1900048	positive regulation of hemostasis	17/5894	28/18866	0.00121088	0.00842673	0.00553381	APOH/CD36/CPB2/DMTN/ENPP4/F12/F2/F3/F7/HRG/NFE2L2/PLA2G4A/PLG/PRDX2/SELP/SERPINF2/THBD	17
GO:1902932	BP	GO:1902932	positive regulation of alcohol biosynthetic process	17/5894	28/18866	0.00121088	0.00842673	0.00553381	ADCYAP1R1/AVPR1B/BMP6/CYP7A1/FGF1/IFNG/IL1B/LHCGR/NTSR1/P2RY1/POU1F1/PRKAA1/PTAFR/PTH/SNCA/TNF/WNT4	17
GO:2000171	BP	GO:2000171	negative regulation of dendrite development	17/5894	28/18866	0.00121088	0.00842673	0.00553381	BCL11A/DCC/DNM3/FSTL4/GSK3A/HDAC2/ID1/KIAA0319/NLGN3/PLK2/PPP3CA/PTEN/PTPRS/TLX2/TRPC5/TRPC6/UBE3A	17
GO:1902115	BP	GO:1902115	regulation of organelle assembly	81/5894	194/18866	0.00121942	0.00847708	0.00556686	ADPRH/ARHGAP35/ARHGEF2/ARHGEF5/ATG5/ATXN2/ATXN2L/BBS4/BMP10/CAV3/CBLN1/CDK5RAP2/CDKL1/CDKL5/CENPJ/CEP76/CHMP1B/CNOT2/CNOT6/CROCC/CSF2/CYLD/DNM2/DYNC2LI1/EDN1/FEZ2/FUZ/G3BP2/GAP43/HAP1/IFT140/IL5/KCTD17/LCP1/LRRTM2/MAK/MAP4/MAPK9/MARK4/MNS1/MTM1/MYLK3/NPM1/NUMA1/NUPR1/PIKFYVE/PIP4K2A/PIP4K2B/PIP4K2C/PLK2/PRKAA1/PROX1/PTPRD/PTPRS/RAB1B/RAB3GAP1/RAB3GAP2/RABEP2/RDX/RNF4/RNF5/SCFD1/SDC1/SDC4/SDCBP/SE…	81
GO:0015980	BP	GO:0015980	energy derivation by oxidation of organic compounds	111/5894	278/18866	0.00123685	0.00858901	0.00564038	ACO1/ACO2/ACSM1/ADRB3/AGL/AKT2/CBFA2T3/CISD1/COQ10B/COX10/COX15/COX4I1/COX6A1/COX6A2/COX6B1/COX8A/CYCS/CYP1A2/DLAT/DLD/DLST/DNAJC15/DYRK2/ESRRB/ETFA/ETFB/FH/GCGR/GCK/GFPT1/GNAS/GNMT/GPD1/GPD2/GSK3A/GYG1/GYG2/GYS1/IDE/IDH1/IDH2/IDH3A/IDH3B/IDH3G/IFNG/IL4/INPP5K/INS/INSR/IREB2/IRS2/ISCU/KHK/LEP/MC4R/MDH1/MDH2/ME2/ME3/MECP2/MT3/MTOR/NDUFA1/NDUFA4/NDUFA5/NDUFA6/NDUFA7/NDUFA8/NDUFA9/NDUFB1/NDUFB11/NDU…	111
GO:0071260	BP	GO:0071260	cellular response to mechanical stimulus	38/5894	79/18866	0.00124907	0.00866458	0.00569	AGT/ANKRD1/ATP1A1/BAD/BAG3/BMP6/CASP1/CASP5/CASP8/CNN2/DAG1/ENG/GADD45A/GJA1/HDAC4/IL13/IL1B/ITGA2/KCNJ2/LTBR/MAG/MAP3K14/MAP3K2/NFKB1/NPPA/PIEZO2/PTGER4/PTGS2/PTPN11/RAC1/SLC38A2/SOX9/TLR7/TLR8/TNFRSF1A/TNFRSF8/TNFSF14/WNT11	38
GO:0046165	BP	GO:0046165	alcohol biosynthetic process	70/5894	164/18866	0.00126506	0.00876616	0.0057567	ABCA2/ACAT2/ADCYAP1R1/APOA4/AVPR1B/BMP2/BMP5/BMP6/CYB5R3/CYP11B1/CYP11B2/CYP27A1/CYP2R1/CYP7A1/DBH/DGKQ/EBP/ERLIN2/FASN/FDFT1/FGF1/GCH1/GFI1/GGPS1/H6PD/HMGCS1/HSD17B7/IDI1/IFNG/IL1B/IMPA1/INSIG1/IP6K2/IPPK/ITPKA/ITPKB/LEP/LHCGR/LPCAT3/MBTPS2/MVD/NFKB1/NFYB/NFYC/NPC1L1/NTSR1/P2RY1/PCK1/PGP/POU1F1/PPIP5K1/PPIP5K2/PRKAA1/PTAFR/PTH/PTK2B/PTS/QDPR/RAN/REST/SC5D/SNCA/SOD1/SPHK2/SPTLC3/SRD5A3/SREBF2/TNF…	70
GO:0048259	BP	GO:0048259	regulation of receptor-mediated endocytosis	48/5894	105/18866	0.00127108	0.00879845	0.00577791	ABCA2/AHI1/ANGPT1/APOC3/ARC/ATXN2/BMP2K/C3/CBL/CCL21/CD63/DKK1/DLG4/DNAJC6/DNM2/DRD2/DRD3/DRD4/EFNB2/EGF/HFE/HIP1R/HPCA/IL4/INSR/ITGB3/LRPAP1/LRRTM2/MAGI2/MKLN1/NECAB2/NTF3/OPHN1/PICALM/PICK1/PIK3CB/RAB21/RAC1/SCRIB/SCYL2/SDCBP/SELE/SH3GL3/SNAP91/SYK/SYT11/TNK2/UBQLN2	48
GO:0043507	BP	GO:0043507	positive regulation of JUN kinase activity	36/5894	74/18866	0.00128498	0.00888513	0.00583483	AGER/ARHGEF5/BIRC7/CD40LG/DKK1/EDN1/EPHA4/ERCC6/ERN1/ERN2/FGD2/FZD10/FZD5/MAP2K7/MAP3K10/MAP3K12/MAP3K13/MAP3K2/MAP3K5/MAP3K6/MAP3K7/MAP4K5/MAPK8IP3/PKN1/PTK2B/PTPN1/ROR2/SPAG9/SYK/TAOK1/TLR6/TNF/TNFSF11/TNIK/TRAF6/WNT5A	36
GO:0009268	BP	GO:0009268	response to pH	23/5894	42/18866	0.00130664	0.00902443	0.00592631	ASIC1/CA2/GIP/GJA1/GNA11/GPLD1/GPR31/GPR65/GPR68/HYAL1/IMPACT/INSRR/LGMN/MCOLN1/NOX1/PAM/PCK1/PKD2L1/RAB11B/RAB11FIP5/SLC38A3/SRC/TTPA	23
GO:0050707	BP	GO:0050707	regulation of cytokine secretion	30/5894	59/18866	0.00130808	0.00902443	0.00592631	AGTR2/BTN2A2/C1QTNF3/CRTAM/DRD2/FCGR2B/FGR/FOXP3/GAPDH/GLMN/HDAC9/HTR2B/IFNG/IL26/INS/LRRC32/MIF/P2RX7/PTGER4/RGCC/SCAMP5/SORL1/SRC/SRGN/SYK/SYT11/TLR6/TLR8/TNF/TNFRSF4	30
GO:0061371	BP	GO:0061371	determination of heart left/right asymmetry	34/5894	69/18866	0.0013093	0.00902443	0.00592631	AHI1/BBS4/BBS7/CCDC40/CER1/DNAAF1/ENG/FGF8/FOXH1/GATA4/HAND1/HAND2/IFT57/LBX1/MEGF8/MICAL2/NDRG4/NKX2-5/NOTCH1/OVOL2/PKD2/PSEN1/SHH/SMAD3/SMO/SOX18/SRF/TBR1/TBX2/TBX21/TBX3/TMED2/WNT5A/ZIC3	34
GO:0001947	BP	GO:0001947	heart looping	32/5894	64/18866	0.00131841	0.0090583	0.00594856	AHI1/BBS4/BBS7/CCDC40/DNAAF1/ENG/FGF8/FOXH1/GATA4/HAND1/HAND2/IFT57/LBX1/MICAL2/NDRG4/NKX2-5/NOTCH1/OVOL2/PKD2/PSEN1/SHH/SMAD3/SMO/SOX18/SRF/TBR1/TBX2/TBX21/TBX3/TMED2/WNT5A/ZIC3	32
GO:0032835	BP	GO:0032835	glomerulus development	32/5894	64/18866	0.00131841	0.0090583	0.00594856	ADIPOQ/AGTR2/ANGPT1/BCL2/BMP4/COL4A4/FOXC1/FOXC2/FOXJ1/HES1/HEYL/IL6R/IQGAP1/JAG1/KLF15/LHX1/MAGI2/MTSS1/MYO1E/NOTCH1/NOTCH3/NPHS1/NPHS2/PAX2/PDGFB/PDGFD/PECAM1/PLCE1/PTPRO/RET/SERPINB7/WT1	32
GO:1901862	BP	GO:1901862	negative regulation of muscle tissue development	32/5894	64/18866	0.00131841	0.0090583	0.00594856	AKIRIN1/BMP2/BMP4/CAV3/CTDP1/CXADR/DKK1/EPHB1/FGF3/FGF8/FRS2/FZD7/GJA1/GSK3A/IGFBP5/JARID2/KCNK2/LUC7L/MAPK11/MSTN/PPARA/PTEN/RBP4/RGS4/SHH/SIRT2/SMAD4/SOX15/TLL2/TP73/USP19/YBX3	32
GO:0006739	BP	GO:0006739	NADP metabolic process	20/5894	35/18866	0.00132741	0.00910082	0.00597648	DCXR/DERA/FMO1/GCK/H6PD/IDH1/IDH2/ME2/NADK/NNT/NOX1/NUDT13/PGAM1/PGLS/RBKS/RPE/RPIA/SHPK/TKT/TP53	20
GO:0071312	BP	GO:0071312	cellular response to alkaloid	20/5894	35/18866	0.00132741	0.00910082	0.00597648	ADCY8/AIF1/ATG7/BCL2L1/CACNA1S/CASP3/CASP6/CRH/CRHBP/DDC/GSTM2/HTR1B/MDM2/OPRM1/RECQL5/RYR3/SLC34A1/SLC8A1/STAR/TH	20
GO:0010565	BP	GO:0010565	regulation of cellular ketone metabolic process	79/5894	189/18866	0.0013385	0.00916714	0.00602003	ABCB11/ABCD1/ABCD2/ACADL/ADIPOQ/ADM/AKT2/APOA4/APOC3/APPL2/ATP2B4/AVP/AVPR1A/BMP2/BMP5/BMP6/CAV1/CD74/CLN3/COMT/COQ3/CPT1A/CYP7A1/DGKQ/DKKL1/EIF6/ERLIN2/FABP1/FABP3/FABP5/FGFR4/GHSR/GIP/GSTZ1/H6PD/IL1B/INS/INSIG1/IRS2/MID1IP1/MLXIPL/MTOR/NCOR2/NQO1/NR1H2/NR1H4/PANK2/PDK3/PDPR/PIBF1/PLA2G3/PPARA/PPARD/PPARG/PRKAG2/PRKCE/PROX1/PSMA5/PSMB6/PSMB7/PSMC3/PSMC4/PSMC5/PSMC6/PSMD1/PSMD12/PSMD5/PSMD6/PSMD8…	79
GO:0051453	BP	GO:0051453	regulation of intracellular pH	41/5894	87/18866	0.00135746	0.00928721	0.00609888	ATP6AP2/ATP6V0A1/ATP6V0A2/ATP6V0D1/ATP6V0E2/ATP6V1A/ATP6V1B1/ATP6V1B2/ATP6V1E1/ATP6V1G1/ATP6V1H/AVP/AVPR1A/BCL2/CA2/CA7/CLN3/CLN5/CLN6/FASLG/NOX1/RAB38/RAB7A/SLC26A3/SLC4A1/SLC4A10/SLC4A3/SLC4A5/SLC4A7/SLC4A8/SLC9A2/SLC9A3/SLC9A5/SLC9A6/SLC9A7/SLC9A8/TM9SF4/TMEM165/TTPA/UBE3A/VPS33A	41
GO:0035902	BP	GO:0035902	response to immobilization stress	16/5894	26/18866	0.00137623	0.00934654	0.00613784	ACTR2/BRD1/CRH/CYP1A2/ERCC1/FOXO4/GAL/MDM2/NR0B1/PITX3/PPARG/PTK2B/REN/SLC8A1/TH/TPH1	16
GO:0043501	BP	GO:0043501	skeletal muscle adaptation	16/5894	26/18866	0.00137623	0.00934654	0.00613784	ACTA1/ATP2A2/CAMK2B/GTF2IRD1/IGFBP5/IL15/MSTN/MTOR/MYH7/MYOD1/MYOG/MYOZ2/PPP3CA/TNNC1/TNNI1/TNNT1	16
GO:0043951	BP	GO:0043951	negative regulation of cAMP-mediated signaling	16/5894	26/18866	0.00137623	0.00934654	0.00613784	APLNR/APLP1/ATP2B4/CDC34/CRTC3/GNAI2/MGRN1/NPY2R/OPRL1/OPRM1/PDE10A/PDE11A/PDE3A/PDE3B/PDE4D/SSTR4	16
GO:0046174	BP	GO:0046174	polyol catabolic process	16/5894	26/18866	0.00137623	0.00934654	0.00613784	BPNT1/GK/GK2/GPD2/IMPA1/INPP5B/INPP5J/INPP5K/MTMR7/NTSR1/OCRL/PTEN/SORD/SYNJ1/SYNJ2/TPI1	16
GO:0051350	BP	GO:0051350	negative regulation of lyase activity	16/5894	26/18866	0.00137623	0.00934654	0.00613784	AKAP5/CCR2/DRD2/DRD3/GABBR2/GALR1/GALR2/GNAI2/GPR87/GRM2/GRM3/HPCA/LTB4R2/MTRR/NPR3/PDZD3	16
GO:0072202	BP	GO:0072202	cell differentiation involved in metanephros development	16/5894	26/18866	0.00137623	0.00934654	0.00613784	ADIPOQ/BMP4/CITED1/CTNNB1/GDNF/LIF/NPHS2/PAX2/PAX8/PDGFB/POU3F3/SALL1/SIX2/SMO/WNT4/YAP1	16
GO:0072273	BP	GO:0072273	metanephric nephron morphogenesis	16/5894	26/18866	0.00137623	0.00934654	0.00613784	BMP4/CITED1/CTNNB1/GDNF/HES1/LHX1/LIF/PAX2/PAX8/PKD2/SALL1/SIX2/SMO/SOX9/WNT4/WT1	16
GO:0022898	BP	GO:0022898	regulation of transmembrane transporter activity	110/5894	276/18866	0.00139622	0.00947239	0.00622049	ACTB/ACTN2/ACTN4/ADRA2A/ADRB2/ARC/ATP2A1/BCL2/CACNA1D/CACNA2D1/CACNB1/CACNB3/CACNG2/CACNG3/CACNG4/CACNG5/CASQ1/CAV1/CAV3/CCL2/CCR2/CHRM3/CLIC2/CNIH3/CRH/CRHBP/CRHR1/DAPK1/DLG1/DLG4/DNM2/DRD2/DRD3/DRD4/DYSF/EPO/FGF12/FGF13/FKBP1B/FXYD2/FXYD3/FXYD5/FXYD6/FXYD7/GAL/GALR2/GJA1/GRIA1/GRIA2/GRIA3/GRIA4/GRIN1/GRIN2A/GRIN2B/GRM5/GSTM2/HAP1/HECW1/HPCA/HTR3A/IFNG/INS/JPH3/KCNA1/KCNC1/KCNC2/KCNE1/KCNE4/KCNG…	110
GO:2000241	BP	GO:2000241	regulation of reproductive process	72/5894	170/18866	0.00140132	0.00949704	0.00623667	ACVR1B/ARHGDIB/BMP4/C1QBP/CCDC87/CCR6/CDKN1B/CIB1/CRISP1/CTNNB1/DAZL/DEFB1/DMRT1/ESR1/FZR1/GCM1/GDF9/GJA1/GLRA1/GNRH1/GPR3/HDAC2/HDAC4/HYAL3/INSR/LFNG/LIF/MSX1/NOTCH1/NOX5/NPPC/NPR2/NR5A1/NUPR1/OVGP1/OXT/OXTR/P2RY1/PAEP/PDE3A/PHLDA2/PLCB1/PPP2R1A/PRDM14/PRDM9/PTAFR/PTGDR2/RETN/RXRA/SEMA3A/SEMG1/SEMG2/SHH/SIRT2/SNAI1/SOX9/SRC/SRY/STK11/STK4/STXBP1/SYDE1/TACR3/TCP11/VIP/WNT4/WNT5A/WT1/YTHDF2/ZFPM2/…	72
GO:0005996	BP	GO:0005996	monosaccharide metabolic process	117/5894	296/18866	0.00142435	0.00963961	0.0063303	ADIPOQ/AKT2/ALDH1A1/ALDOA/ALDOC/ARPP19/ATF4/BAD/BPGM/BRS3/C1QTNF1/C1QTNF3/COX11/CPT1A/CREM/CYB5R3/DCXR/DGKQ/DLAT/DYRK2/ENO3/EP300/ESRRB/FABP5/FGGY/FOXO1/FPGT/FUT4/FUT5/FUT7/G6PC2/G6PC3/GALK2/GAPDH/GAPDHS/GCG/GCGR/GCK/GNB3/GNMT/GPD1/GPD2/GPI/GPLD1/GPT/GSK3A/H6PD/HKDC1/INPP5K/INS/INSR/IRS2/KHK/LCMT1/LEP/MAN2A1/MAN2A2/MAN2C1/MDH1/MDH2/MPI/MST1/MTOR/OAS1/OGT/ONECUT1/PASK/PCK1/PDHA1/PDHA2/PDK3/PDX1/PF…	117
GO:0006953	BP	GO:0006953	acute-phase response	25/5894	47/18866	0.00142682	0.00963961	0.0063303	APCS/ASS1/CRP/EPO/F2/F8/HFE/HP/IL1B/IL22/IL6/IL6R/INS/LBP/MBL2/ORM1/PTGER3/PTGS2/SERPINA3/SERPINF2/SIGIRR/STAT3/TFR2/TNF/TNFSF11	25
GO:0022602	BP	GO:0022602	ovulation cycle process	25/5894	47/18866	0.00142682	0.00963961	0.0063303	AFP/BMPR1B/CASP3/ESR1/FSHB/FSHR/GDF9/KISS1/LEP/LHCGR/MAP2K6/MSTN/NOS3/NPY5R/NR5A1/NRIP1/PAM/PGR/PLEKHA1/PTX3/RETN/SGPL1/SRC/STAT5B/TGFB2	25
GO:0061326	BP	GO:0061326	renal tubule development	44/5894	95/18866	0.00143606	0.00969188	0.00636462	AGT/AGTR2/AHI1/BCL2/BMP2/BMP4/CITED1/CTNNB1/DCHS1/DLG1/EYA1/FGF1/FGF8/GATA3/GDNF/GPC3/GREB1L/HES1/HEYL/JAG1/KLHL3/LHX1/LIF/MTSS1/NOTCH1/PAX2/PAX8/PKD2/POU3F3/PTCH1/SALL1/SHH/SIX2/SMAD4/SMO/SOX9/UMOD/WNT1/WNT11/WNT2B/WNT4/WNT6/WT1/YAP1	44
GO:0061333	BP	GO:0061333	renal tubule morphogenesis	37/5894	77/18866	0.00147245	0.00991687	0.00651237	AGT/AGTR2/AHI1/BCL2/BMP2/BMP4/CITED1/CTNNB1/DCHS1/DLG1/EYA1/FGF1/FGF8/GATA3/GDNF/GPC3/GREB1L/HES1/KLHL3/LHX1/MTSS1/PAX2/PAX8/PKD2/PTCH1/SALL1/SHH/SIX2/SMAD4/SMO/SOX9/WNT1/WNT11/WNT2B/WNT4/WNT6/WT1	37
GO:0072028	BP	GO:0072028	nephron morphogenesis	37/5894	77/18866	0.00147245	0.00991687	0.00651237	AGT/AGTR2/AHI1/BCL2/BMP2/BMP4/CITED1/CTNNB1/DCHS1/DLG1/EYA1/FGF1/FGF8/GATA3/GDNF/GPC3/GREB1L/HES1/KLHL3/LHX1/LIF/PAX2/PAX8/PKD2/PTCH1/SALL1/SHH/SIX2/SMAD4/SMO/SOX9/WNT1/WNT11/WNT2B/WNT4/WNT6/WT1	37
GO:0006885	BP	GO:0006885	regulation of pH	47/5894	103/18866	0.00148796	0.0100109	0.00657413	ATP12A/ATP6AP1/ATP6AP2/ATP6V0A1/ATP6V0A2/ATP6V0D1/ATP6V0E2/ATP6V1A/ATP6V1B1/ATP6V1B2/ATP6V1E1/ATP6V1G1/ATP6V1H/AVP/AVPR1A/BCL2/CA2/CA7/CLN3/CLN5/CLN6/EDN1/FASLG/MAFG/MAPK1/NOX1/RAB38/RAB7A/SLC26A3/SLC26A4/SLC4A1/SLC4A10/SLC4A3/SLC4A5/SLC4A7/SLC4A8/SLC9A2/SLC9A3/SLC9A5/SLC9A6/SLC9A7/SLC9A8/TM9SF4/TMEM165/TTPA/UBE3A/VPS33A	47
GO:0009799	BP	GO:0009799	specification of symmetry	59/5894	135/18866	0.00149838	0.0100705	0.00661328	ACVR2B/AHI1/AIDA/ALDH1A2/ALG5/BBS4/BBS7/BMP4/C9orf116/CCDC40/CER1/CTNNB1/DNAAF1/DNAI1/DNAI2/DYNC2H1/DYNC2LI1/ENG/FGF8/FOXH1/FOXJ1/GALNT11/GATA4/HAND1/HAND2/IFT140/IFT57/IFT74/LBX1/LEFTY1/LRRC6/MEGF8/MICAL2/NDRG4/NKX2-5/NKX3-2/NOTCH1/OFD1/OVOL2/PKD2/PSEN1/PSKH1/RFX3/SHH/SMAD2/SMAD3/SMO/SOSTDC1/SOX18/SRF/TBR1/TBX1/TBX2/TBX21/TBX3/TMED2/WNT5A/WNT8B/ZIC3	59
GO:1990089	BP	GO:1990089	response to nerve growth factor	27/5894	52/18866	0.0015046	0.0101018	0.00663385	ACAP2/BDNF/CALCA/CBL/CDC5L/CIB1/CREB1/CRK/DYNC1LI2/EEF2/EHD1/ID1/KCNC1/KCNC2/KIDINS220/MAGI2/MICALL1/NGF/NTF3/NTRK1/PTEN/RAPGEF1/STMN2/TAC1/UBE3A/USP8/WASF1	27
GO:0001990	BP	GO:0001990	regulation of systemic arterial blood pressure by hormone	22/5894	40/18866	0.00153485	0.0102308	0.00671852	ACE/AGT/AGTR2/ATP6AP2/AVPR1A/AVPR1B/AVPR2/CORIN/CPA3/CYP11B2/DRD3/DRD5/EDN1/F2RL1/GJA5/HSD11B2/NOS3/NOX1/OR51E2/OXTR/REN/SERPINF2	22
GO:0006730	BP	GO:0006730	one-carbon metabolic process	22/5894	40/18866	0.00153485	0.0102308	0.00671852	AHCY/ALDH1L1/CA1/CA10/CA11/CA12/CA14/CA2/CA3/CA4/CA5A/CA6/CA7/CA8/FTCD/GNMT/MAT1A/MAT2A/MAT2B/MTHFD2L/MTHFR/SHMT1	22
GO:0008207	BP	GO:0008207	C21-steroid hormone metabolic process	22/5894	40/18866	0.00153485	0.0102308	0.00671852	ADM/AFP/AKR1C4/AKR1D1/BMP2/BMP5/BMP6/CYP11B1/CYP11B2/CYP17A1/CYP46A1/DGKQ/DHRS2/FDX1/FDXR/FSHB/HSD3B1/HSD3B2/REST/STAR/STAT5B/WNT4	22
GO:0042307	BP	GO:0042307	positive regulation of protein import into nucleus	22/5894	40/18866	0.00153485	0.0102308	0.00671852	BAG3/CDH1/FLNA/HCLS1/HDAC3/HYAL2/IFNG/IPO5/JUP/LEP/MAPK1/MAVS/PIK3R2/PSEN1/PTGS2/RAN/RBM22/SHH/SMAD3/SMO/TARDBP/TPR	22
GO:0090184	BP	GO:0090184	positive regulation of kidney development	22/5894	40/18866	0.00153485	0.0102308	0.00671852	ADIPOQ/AGT/AGTR2/BMP4/GATA3/GDNF/IL6R/LHX1/LIF/LIN28A/PAX2/PAX8/PDGFB/PDGFD/RET/SERPINB7/SHH/SMO/SOX9/WNT2B/WNT4/WT1	22
GO:1902895	BP	GO:1902895	positive regulation of pri-miRNA transcription by RNA polymerase II	22/5894	40/18866	0.00153485	0.0102308	0.00671852	BMP2/BMPR1A/ETS1/FOSL1/GATA3/NGFR/NR3C1/PDGFB/PPARG/PRL/RELA/SMAD3/SMAD6/SMARCA4/SREBF2/SRF/STAT3/TERT/TGFB2/TNF/TP53/WT1	22
GO:1902991	BP	GO:1902991	regulation of amyloid precursor protein catabolic process	22/5894	40/18866	0.00153485	0.0102308	0.00671852	ABCA2/ABCA7/AGER/BIN1/CASP3/EFNA3/EPHA4/FLOT2/GGA3/GSAP/GSK3A/HAP1/IFNG/PICALM/PIN1/RELA/ROCK2/SORL1/SPON1/TMED10/TNF/UNC13A	22
GO:0003338	BP	GO:0003338	metanephros morphogenesis	19/5894	33/18866	0.00154439	0.0102643	0.00674052	AGTR2/BMP4/CITED1/CTNNB1/FOXJ1/FRAS1/GDNF/HES1/LHX1/LIF/PAX2/PAX8/PKD2/SALL1/SIX2/SMO/SOX9/WNT4/WT1	19
GO:0002090	BP	GO:0002090	regulation of receptor internalization	29/5894	57/18866	0.00154622	0.0102643	0.00674052	AHI1/ANGPT1/ARC/ATXN2/CD63/DKK1/DLG4/DRD2/DRD3/DRD4/EFNB2/EGF/HPCA/INSR/ITGB3/LRPAP1/LRRTM2/MAGI2/MKLN1/NECAB2/NTF3/OPHN1/PICK1/SCRIB/SCYL2/SDCBP/SELE/SYK/UBQLN2	29
GO:0061178	BP	GO:0061178	regulation of insulin secretion involved in cellular response to glucose stimulus	29/5894	57/18866	0.00154622	0.0102643	0.00674052	ADCY8/ADRA2A/BAD/BAIAP3/BRSK2/CDK16/CRH/EPHA5/FKBP1B/GCG/GPLD1/GPR27/GPR68/HMGN3/KIF5B/LRP1/MPC2/NADK/NR1H4/PDX1/PLA2G6/PPP3CB/PRKCE/RAC1/SIDT2/STX4/SYBU/TRPM4/VSNL1	29
GO:0098900	BP	GO:0098900	regulation of action potential	29/5894	57/18866	0.00154622	0.0102643	0.00674052	ADRA1A/ATP2A2/BIN1/CACNA1C/CACNA2D1/CACNB3/CAV1/CAV3/CD36/CHRNB2/CNR2/CTNNA3/CXADR/DLG1/DSP/FGF12/FGF13/FLNA/GJA5/HCN4/JUP/KCNJ2/MTNR1B/NTSR1/PKP2/RANGRF/SCN5A/TAC1/TRPM4	29
GO:0045821	BP	GO:0045821	positive regulation of glycolytic process	15/5894	24/18866	0.0015543	0.0102863	0.006755	ARNT/ESRRB/GAPDHS/GPD1/HTR2A/IFNG/INS/INSR/MLXIPL/P2RX7/PFKFB1/PFKFB3/PFKFB4/PRKAA1/PSEN1	15
GO:0045954	BP	GO:0045954	positive regulation of natural killer cell mediated cytotoxicity	15/5894	24/18866	0.0015543	0.0102863	0.006755	AP1G1/CD160/CD226/CRTAM/HLA-E/IL12B/IL18RAP/IL21/LAG3/LAMP1/NCR3/PVR/SH2D1A/STAT5B/VAV1	15
GO:1903429	BP	GO:1903429	regulation of cell maturation	15/5894	24/18866	0.0015543	0.0102863	0.006755	BCL11A/BCL2/CLEC7A/MAP3K13/MTOR/NPPC/NPR2/PAEP/PPP2R1A/RAC3/RET/SIRT2/TCP11/TRIM58/YTHDF2	15
GO:0048635	BP	GO:0048635	negative regulation of muscle organ development	31/5894	62/18866	0.00155816	0.0103013	0.00676484	AKIRIN1/BMP2/BMP4/CAV3/CTDP1/CXADR/DKK1/EPHB1/FGF3/FGF8/FRS2/FZD7/GJA1/GSK3A/JARID2/KCNK2/LUC7L/MAPK11/MSTN/PPARA/PTEN/RBP4/RGS4/SFMBT1/SIRT2/SMAD4/SOX15/TLL2/TP73/USP19/YBX3	31
GO:1905269	BP	GO:1905269	positive regulation of chromatin organization	48/5894	106/18866	0.00162733	0.0107477	0.00705798	AKAP8L/ATF7IP/ATM/BRD7/CDK9/CTBP1/CTNNB1/CTR9/FOXP3/GATA3/GCG/GLYR1/IL1B/ING2/ISL1/JARID2/KAT7/KMT2A/LIF/MECP2/MYB/NAP1L2/NIPBL/NOS1/OGT/PAF1/PAX7/PHF1/PIH1D1/PRDM12/PRDM9/PRKD1/PRKD2/RNF40/RPS6KA4/RPS6KA5/RTF1/SIRT6/SMAD4/SMARCB1/SPHK2/TAL1/TP53/TPR/UBE2N/WDR61/ZBTB7B/ZNF304	48
GO:0021782	BP	GO:0021782	glial cell development	54/5894	122/18866	0.00164418	0.0108479	0.00712379	ABCA2/ADAM22/AGER/AKT2/ARHGEF10/ASCL1/B4GALT6/CD9/CNTF/CNTN2/CNTNAP1/CSPG5/DAG1/DICER1/DRD1/EIF2B1/EIF2B2/EIF2B3/ERCC2/GSTP1/HDAC11/ID2/IFNG/IL1B/IL6/KCNJ10/KRAS/LAMC3/LDLR/LRP1/MAG/MED12/MT3/NF1/NKX2-2/PICK1/POU3F1/POU3F2/PRDM8/PRX/PSEN1/PTEN/ROR2/S100A8/SHH/SIRT2/SKI/SLC25A46/SMO/SOD1/TENM4/TNF/TPPP/VIM	54
GO:0014032	BP	GO:0014032	neural crest cell development	38/5894	80/18866	0.00167056	0.0110106	0.00723065	ALDH1A2/ALX1/ANXA6/BMP4/BMPR1A/EDN1/ERBB4/FOXC1/FOXC2/GBX2/GDNF/HAND2/HES1/HTR2B/ISL1/JAG1/KITLG/KLHL12/MAPK1/NRTN/OVOL2/PDCD6/PHOX2B/RET/SEMA3A/SEMA3B/SEMA3D/SEMA4A/SEMA4G/SEMA6A/SEMA6B/SEMA6C/SEMA6D/SEMA7A/SHH/SMO/SOX9/TBX1	38
GO:0034612	BP	GO:0034612	response to tumor necrosis factor	125/5894	320/18866	0.00167224	0.0110106	0.00723065	ABCC2/ACTN4/ADAM9/ADAMTS13/ADAMTS7/ADIPOQ/ANKRD1/ARHGEF2/ASS1/BAG4/BIRC3/CALCA/CARD8/CASP1/CASP3/CASP4/CASP8/CCL1/CCL11/CCL13/CCL16/CCL2/CCL21/CCL23/CCL24/CCL25/CCL5/CD40LG/CD58/CD70/CDIP1/CEBPA/CHUK/CIB1/CRHBP/CX3CL1/CYLD/EDA/EDA2R/EDAR/EDN1/ENDOG/F2RL1/FABP4/GAS6/GATA3/GBP2/GCH1/GGT5/GPD1/GPS2/GSTP1/HDAC4/HMHB1/HYAL1/HYAL2/HYAL3/IKBKB/INPP5K/KRT18/LTA/LTBR/MADD/MAP2K7/MAP3K14/MAP3K5/MAP4K3/MAPK…	125
GO:2001222	BP	GO:2001222	regulation of neuron migration	24/5894	45/18866	0.00168304	0.0110705	0.00726995	ARHGEF2/CAMK2A/CAMK2B/CTNNA2/CX3CL1/ERBB4/FBXO31/FLNA/GNRH1/GPR173/LRIG2/NIPBL/NTNG1/PHACTR1/PLAA/PLXNB2/SCRT1/SEMA3A/SEMA6A/SOX14/STAT3/TNN/ULK4/ZNF609	24
GO:0000302	BP	GO:0000302	response to reactive oxygen species	95/5894	235/18866	0.00169978	0.0111693	0.00733481	ABL1/ADAM9/ANKZF1/APOA4/BAD/BCL2/BTK/CASP3/CBX8/CD36/CHUK/CRK/CRYGD/CYP1B1/DNM2/DPEP1/EDN1/EEF2/EGLN1/ENDOG/ERCC6/ETS1/FABP1/FANCC/FKBP1B/FOSL1/FOXO1/FYN/GCH1/GLRX2/GPR37L1/GPX1/GSTP1/HDAC2/HDAC6/HGF/HNRNPD/HP/HYAL1/HYAL2/IL18RAP/IL6/IMPACT/KCNC2/KDM6B/KPNA4/MAP3K5/MAPK1/MAPK9/MB/MDM2/MPO/MT3/MYB/NCF1/NET1/NFE2L2/NME8/NOS3/NQO1/NUDT15/OSER1/PAX2/PDE8A/PDGFD/PKD2/PLEKHA1/PPP5C/PRDX1/PRDX2/PRKAA1/P…	95
GO:0006071	BP	GO:0006071	glycerol metabolic process	14/5894	22/18866	0.00174112	0.0113602	0.00746021	ANGPTL3/COQ2/COQ3/DYSF/GK/GK2/GPD2/LEP/MOGAT2/MYOF/PCK1/PGP/PLA2G4A/TPI1	14
GO:0023058	BP	GO:0023058	adaptation of signaling pathway	14/5894	22/18866	0.00174112	0.0113602	0.00746021	ADM/ADRB2/APLNR/ARR3/DNM2/DRD2/DRD3/GIPR/GRK4/HTR1B/HTR2B/NECAB2/SAG/UBQLN2	14
GO:0042749	BP	GO:0042749	regulation of circadian sleep/wake cycle	14/5894	22/18866	0.00174112	0.0113602	0.00746021	ADORA1/ADRB1/CHRNB2/CRH/CSF2/DRD2/DRD3/GHRH/GHRHR/HCRTR2/KCNA2/MTNR1B/NPY2R/PER3	14
[truncated: 993 more rows]
