# Supplementary material for: Molecular subtyping of esophageal squamous cell carcinoma by large-scale transcriptional profiling: Characterization, therapeutic targets, and prognostic value
Source: Front Genet. 2022 Nov 8;13:1033214. doi: 10.3389/fgene.2022.1033214 (PMC9678939; doi:10.3389/fgene.2022.1033214)
Supplement: Supplementary file 4 [file Table1.XLSX]

## Sheet: Supplementary file 1
Pathways that are commonly regulated among the three subtypes
	suntype1_enrichmentScore	suntype1_NES	suntype2_enrichmentScore	suntype2_NES	suntype3_enrichmentScore	suntype3_NES	ONTOLOGY	ID	Description
GO:0000280	0.554716	2.07812	0.550897	2.10647	0.572958	2.21225	BP	GO:0000280	nuclear division
GO:0000793	0.63886	2.24266	0.642905	2.27328	0.670844	2.38604	CC	GO:0000793	condensed chromosome
GO:0000819	0.629375	2.19877	0.627521	2.1884	0.644673	2.26993	BP	GO:0000819	sister chromatid segregation
GO:0005201	0.648313	2.24727	0.591659	2.05299	0.597286	2.08203	MF	GO:0005201	extracellular matrix structural constituent
GO:0005788	0.585347	2.16076	0.563699	2.0982	0.5281	1.99177	CC	GO:0005788	endoplasmic reticulum lumen
GO:0006260	0.624943	2.2712	0.620369	2.28805	0.631944	2.33718	BP	GO:0006260	DNA replication
GO:0006261	0.707244	2.39875	0.690249	2.36868	0.716337	2.47398	BP	GO:0006261	DNA-dependent DNA replication
GO:0006281	0.563877	2.16374	0.549779	2.14949	0.571407	2.237	BP	GO:0006281	DNA repair
GO:0006310	0.628966	2.27442	0.61711	2.25511	0.642284	2.36821	BP	GO:0006310	DNA recombination
GO:0007059	0.582174	2.142	0.588954	2.17884	0.61143	2.27851	BP	GO:0007059	chromosome segregation
GO:0030198	0.632549	2.38347	0.558207	2.1365	0.547884	2.12036	BP	GO:0030198	extracellular matrix organization
GO:0031012	0.498977	1.92392	0.442805	1.7439	0.413919	1.64392	CC	GO:0031012	extracellular matrix
GO:0033260	0.809212	2.43352	0.785584	2.41359	0.808371	2.48047	BP	GO:0033260	nuclear DNA replication
GO:0043062	0.632292	2.38434	0.557738	2.13305	0.547648	2.11634	BP	GO:0043062	extracellular structure organization
GO:0044770	0.478793	1.86153	0.463479	1.83881	0.469527	1.87964	BP	GO:0044770	cell cycle phase transition
GO:0044772	0.48844	1.89798	0.482585	1.90609	0.487577	1.9483	BP	GO:0044772	mitotic cell cycle phase transition
GO:0044786	0.797064	2.42809	0.779595	2.42423	0.805587	2.49699	BP	GO:0044786	cell cycle DNA replication
GO:0048285	0.531835	2.02118	0.528174	2.03691	0.547677	2.12532	BP	GO:0048285	organelle fission
GO:0051301	0.480052	1.85103	0.474761	1.87297	0.496806	1.97305	BP	GO:0051301	cell division
GO:0060337	0.698493	2.27196	0.717017	2.34885	0.603822	2.00379	BP	GO:0060337	type I interferon signaling pathway
GO:0071103	0.594607	2.1695	0.579237	2.1511	0.61195	2.27145	BP	GO:0071103	DNA conformation change
GO:0071357	0.698493	2.27196	0.717017	2.34885	0.603822	2.00379	BP	GO:0071357	cellular response to type I interferon
GO:0098687	0.59642	2.20951	0.58716	2.19239	0.619562	2.34892	CC	GO:0098687	chromosomal region
GO:0098813	0.610982	2.17673	0.617404	2.23252	0.632326	2.29073	BP	GO:0098813	nuclear chromosome segregation
GO:0140097	0.629987	2.21827	0.609832	2.158	0.632891	2.25943	MF	GO:0140097	catalytic activity, acting on DNA
GO:1990904	0.465461	1.80969	0.419414	1.66399	0.463939	1.85727	CC	GO:1990904	ribonucleoprotein complex
GO:0140014	0.561451	2.06302	0.562312	2.08236	0.578462	2.15641	BP	GO:0140014	mitotic nuclear division
GO:0000070	0.642627	2.20213	0.639494	2.20599	0.653704	2.25651	BP	GO:0000070	mitotic sister chromatid segregation
GO:0034340	0.698475	2.28076	0.716501	2.35658	0.604337	2.01148	BP	GO:0034340	response to type I interferon
GO:0032963	0.69814	2.27966	0.642329	2.11262	0.629439	2.09503	BP	GO:0032963	collagen metabolic process
GO:0016887	0.518901	1.94973	0.500057	1.91534	0.513613	1.9844	MF	GO:0016887	ATPase activity
GO:0062023	0.504795	1.92114	0.451577	1.74618	0.430456	1.67036	CC	GO:0062023	collagen-containing extracellular matrix
GO:0022613	0.505644	1.91794	0.483117	1.85661	0.522686	2.02837	BP	GO:0022613	ribonucleoprotein complex biogenesis
GO:0006403	0.580706	2.07018	0.540397	1.95944	0.574084	2.07803	BP	GO:0006403	RNA localization
GO:0005581	0.760345	2.31624	0.756198	2.35147	0.742396	2.30112	CC	GO:0005581	collagen trimer
GO:0034660	0.507078	1.9003	0.477894	1.82855	0.516222	1.99514	BP	GO:0034660	ncRNA metabolic process
GO:0005819	0.526923	1.96164	0.529623	1.99566	0.526913	2.00721	CC	GO:0005819	spindle
GO:0001501	0.475063	1.82401	0.430346	1.68623	0.393861	1.54997	BP	GO:0001501	skeletal system development
GO:0034470	0.528571	1.95932	0.488602	1.83185	0.522748	1.98074	BP	GO:0034470	ncRNA processing
GO:0006302	0.587593	2.07808	0.594744	2.12347	0.625882	2.24774	BP	GO:0006302	double-strand break repair
GO:0022617	0.730859	2.2844	0.635764	1.99352	0.589292	1.85654	BP	GO:0022617	extracellular matrix disassembly
GO:0000723	0.637936	2.16356	0.628002	2.1545	0.639413	2.20135	BP	GO:0000723	telomere maintenance
GO:0006913	0.499353	1.85664	0.492074	1.87189	0.513088	1.96422	BP	GO:0006913	nucleocytoplasmic transport
GO:0032200	0.636033	2.15722	0.627044	2.15178	0.637668	2.20228	BP	GO:0032200	telomere organization
GO:0071897	0.588939	2.0686	0.586254	2.06376	0.567275	2.01318	BP	GO:0071897	DNA biosynthetic process
GO:0000779	0.675689	2.20635	0.671887	2.20984	0.698523	2.32497	CC	GO:0000779	condensed chromosome, centromeric region
GO:0000781	0.632368	2.14303	0.598765	2.04807	0.640292	2.19534	CC	GO:0000781	chromosome, telomeric region
GO:0051169	0.500398	1.86476	0.492446	1.87085	0.513711	1.96786	BP	GO:0051169	nuclear transport
GO:0030574	0.785956	2.26743	0.743624	2.16135	0.716947	2.11368	BP	GO:0030574	collagen catabolic process
GO:0071824	0.565889	2.01026	0.556326	2.00409	0.580968	2.10125	BP	GO:0071824	protein-DNA complex subunit organization
GO:0006631	-0.452978	-1.82865	-0.461081	-1.78111	-0.449542	-1.72851	BP	GO:0006631	fatty acid metabolic process
GO:0033044	0.512409	1.89917	0.513884	1.93627	0.538846	2.0465	BP	GO:0033044	regulation of chromosome organization
GO:0098644	0.897269	2.19985	0.886289	2.14086	0.900184	2.28566	CC	GO:0098644	complex of collagen trimers
GO:0030020	0.822329	2.24623	0.800741	2.20813	0.788464	2.21978	MF	GO:0030020	extracellular matrix structural constituent conferring tensile strength
GO:0051983	0.676692	2.16782	0.67058	2.14823	0.702001	2.2813	BP	GO:0051983	regulation of chromosome segregation
GO:0000375	0.499804	1.86212	0.498936	1.88697	0.512884	1.95905	BP	GO:0000375	RNA splicing, via transesterification reactions
GO:0031145	0.693017	2.19111	0.661576	2.08078	0.695917	2.2168	BP	GO:0031145	anaphase-promoting complex-dependent catabolic process
GO:0005518	0.725854	2.21117	0.697398	2.16863	0.668024	2.0706	MF	GO:0005518	collagen binding
GO:0045786	0.433185	1.68626	0.420143	1.66857	0.428369	1.71545	BP	GO:0045786	negative regulation of cell cycle
GO:0004222	0.671117	2.1514	0.643736	2.06676	0.596505	1.94969	MF	GO:0004222	metalloendopeptidase activity
GO:0030199	0.756888	2.20949	0.744164	2.1794	0.770039	2.30045	BP	GO:0030199	collagen fibril organization
GO:0000377	0.499383	1.85904	0.49685	1.87266	0.51006	1.94527	BP	GO:0000377	RNA splicing, via transesterification reactions with bulged adenosine as nucleophile
GO:0000398	0.499383	1.85904	0.49685	1.87266	0.51006	1.94527	BP	GO:0000398	mRNA splicing, via spliceosome
GO:0000724	0.640154	2.1128	0.63205	2.10181	0.655668	2.20296	BP	GO:0000724	double-strand break repair via homologous recombination
GO:0000725	0.640154	2.1128	0.63205	2.10181	0.655668	2.20296	BP	GO:0000725	recombinational repair
GO:0006323	0.589906	2.02601	0.592408	2.05276	0.623504	2.15412	BP	GO:0006323	DNA packaging
GO:0000775	0.571453	2.00304	0.593164	2.08784	0.607254	2.14754	CC	GO:0000775	chromosome, centromeric region
GO:0005604	0.663585	2.12583	0.650359	2.08345	0.621737	2.02047	CC	GO:0005604	basement membrane
GO:0008094	0.652663	2.1256	0.634187	2.08138	0.649523	2.16498	MF	GO:0008094	DNA-dependent ATPase activity
GO:0050657	0.556707	1.95267	0.526317	1.85779	0.553383	1.96746	BP	GO:0050657	nucleic acid transport
GO:0050658	0.556707	1.95267	0.526317	1.85779	0.553383	1.96746	BP	GO:0050658	RNA transport
GO:0031214	0.589906	2.03386	0.53955	1.87199	0.513767	1.78389	BP	GO:0031214	biomineral tissue development
GO:0110148	0.589906	2.03386	0.53955	1.87199	0.513767	1.78389	BP	GO:0110148	biomineralization
GO:0006405	0.603706	2.02417	0.56313	1.90604	0.62057	2.10298	BP	GO:0006405	RNA export from nucleus
GO:0006397	0.452065	1.72875	0.437485	1.70374	0.458612	1.78758	BP	GO:0006397	mRNA processing
GO:0009615	0.493008	1.8275	0.492836	1.84773	0.434295	1.64559	BP	GO:0009615	response to virus
GO:0051607	0.534625	1.92337	0.529317	1.92477	0.471018	1.7177	BP	GO:0051607	defense response to virus
GO:0065004	0.576775	2.01687	0.572593	2.00253	0.59274	2.08626	BP	GO:0065004	protein-DNA complex assembly
GO:0072331	0.51724	1.88237	0.514621	1.9082	0.533116	1.9757	BP	GO:0072331	signal transduction by p53 class mediator
GO:0120114	0.700486	2.13288	0.678707	2.10432	0.688086	2.12805	CC	GO:0120114	Sm-like protein family complex
GO:0004386	0.595551	2.0231	0.591347	2.03071	0.604877	2.08016	MF	GO:0004386	helicase activity
GO:0003779	-0.417524	-1.69318	-0.404085	-1.60006	-0.423813	-1.65562	MF	GO:0003779	actin binding
GO:0051236	0.560696	1.97414	0.530007	1.8685	0.561058	2.00111	BP	GO:0051236	establishment of RNA localization
GO:0045930	0.486527	1.80986	0.490972	1.84686	0.500344	1.90273	BP	GO:0045930	negative regulation of mitotic cell cycle
GO:0035987	0.786307	2.21021	0.770007	2.18826	0.782743	2.25907	BP	GO:0035987	endodermal cell differentiation
GO:0010608	0.434236	1.68035	0.397075	1.56744	0.39595	1.57503	BP	GO:0010608	posttranscriptional regulation of gene expression
GO:0010948	0.482841	1.79585	0.465683	1.76741	0.48471	1.85401	BP	GO:0010948	negative regulation of cell cycle process
GO:0000777	0.651389	2.0845	0.649325	2.06899	0.679236	2.19912	CC	GO:0000777	condensed chromosome kinetochore
GO:0000075	0.534767	1.89575	0.526712	1.89531	0.562535	2.03109	BP	GO:0000075	cell cycle checkpoint
GO:0001503	0.457586	1.73139	0.427677	1.64411	0.400742	1.5514	BP	GO:0001503	ossification
GO:0030016	-0.487702	-1.88101	-0.487526	-1.77627	-0.485158	-1.75108	CC	GO:0030016	myofibril
GO:0032392	0.622386	2.05785	0.607669	2.018	0.63919	2.13986	BP	GO:0032392	DNA geometric change
GO:0015629	-0.398042	-1.64471	-0.388584	-1.55757	-0.414321	-1.63771	CC	GO:0015629	actin cytoskeleton
GO:1901990	0.458648	1.74304	0.452333	1.74443	0.457954	1.77714	BP	GO:1901990	regulation of mitotic cell cycle phase transition
GO:0043292	-0.489366	-1.89421	-0.491211	-1.81286	-0.482279	-1.75377	CC	GO:0043292	contractile fiber
GO:1901987	0.447168	1.70702	0.428479	1.66473	0.432746	1.68216	BP	GO:1901987	regulation of cell cycle phase transition
GO:0044843	0.492685	1.81065	0.480384	1.77688	0.475517	1.77142	BP	GO:0044843	cell cycle G1/S phase transition
GO:0008380	0.447636	1.70261	0.437813	1.68848	0.456784	1.76955	BP	GO:0008380	RNA splicing
GO:0015931	0.516219	1.85631	0.488774	1.78965	0.516632	1.88977	BP	GO:0015931	nucleobase-containing compound transport
GO:0000784	0.630748	2.0596	0.589754	1.93971	0.632162	2.10409	CC	GO:0000784	nuclear chromosome, telomeric region
GO:0030017	-0.496039	-1.88322	-0.499534	-1.80323	-0.489096	-1.74014	CC	GO:0030017	sarcomere
GO:0000082	0.506058	1.84462	0.512645	1.89426	0.510658	1.88474	BP	GO:0000082	G1/S transition of mitotic cell cycle
GO:0051052	0.48244	1.78707	0.478882	1.79829	0.484589	1.83694	BP	GO:0051052	regulation of DNA metabolic process
GO:1902749	0.518623	1.84863	0.507896	1.83374	0.523177	1.89705	BP	GO:1902749	regulation of cell cycle G2/M phase transition
GO:0060249	0.448874	1.71472	0.438107	1.69927	0.423899	1.64399	BP	GO:0060249	anatomical structure homeostasis
GO:0005583	0.933422	2.05139	0.914202	1.94734	0.924787	2.00679	CC	GO:0005583	fibrillar collagen trimer
GO:0098643	0.933422	2.05139	0.914202	1.94734	0.924787	2.00679	CC	GO:0098643	banded collagen fibril
GO:0006270	0.76245	2.10197	0.757673	2.10735	0.771838	2.19325	BP	GO:0006270	DNA replication initiation
GO:0005539	0.525014	1.86117	0.509092	1.8319	0.488691	1.76447	MF	GO:0005539	glycosaminoglycan binding
GO:1901988	0.506919	1.83639	0.504462	1.8565	0.519635	1.92476	BP	GO:1901988	negative regulation of cell cycle phase transition
GO:0005643	0.661682	2.07591	0.643139	2.02507	0.654184	2.06947	CC	GO:0005643	nuclear pore
GO:2001251	0.584256	1.97003	0.594227	2.0222	0.622349	2.12267	BP	GO:2001251	negative regulation of chromosome organization
GO:0042254	0.488391	1.79142	0.468201	1.73623	0.505721	1.87958	BP	GO:0042254	ribosome biogenesis
GO:0005813	0.420349	1.6173	0.40836	1.6105	0.414689	1.64646	CC	GO:0005813	centrosome
GO:0051304	0.652042	2.05721	0.662709	2.08225	0.682874	2.16791	BP	GO:0051304	chromosome separation
GO:0003697	0.610857	2.01047	0.578977	1.91971	0.65145	2.18554	MF	GO:0003697	single-stranded DNA binding
GO:0097525	0.713431	2.09607	0.68768	2.02796	0.709234	2.1338	CC	GO:0097525	spliceosomal snRNP complex
GO:1905368	0.646571	2.0487	0.58644	1.85165	0.612434	1.95534	CC	GO:1905368	peptidase complex
GO:0003678	0.679273	2.0915	0.671971	2.088	0.685146	2.1294	MF	GO:0003678	DNA helicase activity
GO:0030532	0.708068	2.10581	0.686337	2.05609	0.702989	2.12722	CC	GO:0030532	small nuclear ribonucleoprotein complex
GO:0072329	-0.536085	-1.93858	-0.564083	-1.93882	-0.574022	-1.97814	BP	GO:0072329	monocarboxylic acid catabolic process
GO:0005657	0.692622	2.09546	0.693186	2.13163	0.716187	2.1932	CC	GO:0005657	replication fork
GO:1901796	0.549098	1.92009	0.539031	1.88516	0.56949	2.00443	BP	GO:1901796	regulation of signal transduction by p53 class mediator
GO:0006399	0.587539	1.96492	0.540269	1.82708	0.605798	2.0492	BP	GO:0006399	tRNA metabolic process
GO:2000573	0.669153	2.04765	0.659912	2.05045	0.629712	1.95525	BP	GO:2000573	positive regulation of DNA biosynthetic process
GO:0051168	0.529617	1.86471	0.505551	1.78228	0.54184	1.93257	BP	GO:0051168	nuclear export
GO:0051028	0.572073	1.93889	0.545836	1.869	0.56667	1.94272	BP	GO:0051028	mRNA transport
GO:0002479	0.636297	2.01178	0.585055	1.8401	0.572272	1.82294	BP	GO:0002479	antigen processing and presentation of exogenous peptide antigen via MHC class I, TAP-dependent
GO:0007093	0.54556	1.88709	0.543443	1.88646	0.586111	2.0438	BP	GO:0007093	mitotic cell cycle checkpoint
GO:0032508	0.617326	2.00309	0.60027	1.95875	0.626468	2.07352	BP	GO:0032508	DNA duplex unwinding
GO:0033047	0.663284	2.01961	0.653881	2.02735	0.683012	2.11235	BP	GO:0033047	regulation of mitotic sister chromatid segregation
GO:0033045	0.659372	2.05638	0.650437	2.02942	0.680663	2.12498	BP	GO:0033045	regulation of sister chromatid segregation
GO:0071166	0.590447	1.96354	0.56118	1.88071	0.613143	2.07943	BP	GO:0071166	ribonucleoprotein complex localization
GO:0032201	0.801222	2.12146	0.767857	2.04123	0.792517	2.10962	BP	GO:0032201	telomere maintenance via semi-conservative replication
GO:0010389	0.517582	1.82443	0.506489	1.80976	0.523017	1.87279	BP	GO:0010389	regulation of G2/M transition of mitotic cell cycle
GO:1905330	0.529513	1.85603	0.491481	1.72993	0.483441	1.70968	BP	GO:1905330	regulation of morphogenesis of an epithelium
GO:0030258	-0.457026	-1.77662	-0.469604	-1.75201	-0.462656	-1.69079	BP	GO:0030258	lipid modification
GO:0033559	-0.559922	-1.9497	-0.613089	-2.05059	-0.595695	-1.99313	BP	GO:0033559	unsaturated fatty acid metabolic process
GO:1901991	0.504179	1.80886	0.504921	1.84668	0.522093	1.91132	BP	GO:1901991	negative regulation of mitotic cell cycle phase transition
GO:0071426	0.595906	1.97379	0.560012	1.88049	0.617998	2.09051	BP	GO:0071426	ribonucleoprotein complex export from nucleus
GO:0005681	0.533202	1.85997	0.515255	1.79793	0.544433	1.91157	CC	GO:0005681	spliceosomal complex
GO:0006301	0.718969	2.02737	0.716146	2.05262	0.724436	2.09178	BP	GO:0006301	postreplication repair
GO:0051321	0.512452	1.8092	0.505984	1.79697	0.515749	1.84219	BP	GO:0051321	meiotic cell cycle
GO:0008033	0.613252	1.9659	0.561721	1.80344	0.624986	2.04278	BP	GO:0008033	tRNA processing
GO:0005178	0.54427	1.86871	0.532351	1.83894	0.497777	1.71592	MF	GO:0005178	integrin binding
GO:0051216	0.513941	1.80966	0.471285	1.66773	0.429683	1.53398	BP	GO:0051216	cartilage development
GO:0008307	-0.689837	-2.08111	-0.655629	-1.88875	-0.658821	-1.90534	MF	GO:0008307	structural constituent of muscle
GO:0048407	0.909687	1.99923	0.866906	1.84659	0.858974	1.86398	MF	GO:0048407	platelet-derived growth factor binding
GO:0140098	0.471349	1.7368	0.45132	1.6733	0.480883	1.80726	MF	GO:0140098	catalytic activity, acting on RNA
GO:0006521	0.661239	2.00476	0.625701	1.93576	0.616233	1.90141	BP	GO:0006521	regulation of cellular amino acid metabolic process
GO:0006611	0.530881	1.85503	0.509415	1.77929	0.548805	1.92905	BP	GO:0006611	protein export from nucleus
GO:0042590	0.62058	1.97762	0.572361	1.81652	0.564313	1.82243	BP	GO:0042590	antigen processing and presentation of exogenous peptide antigen via MHC class I
GO:0044839	0.472886	1.7399	0.465656	1.72269	0.484361	1.80498	BP	GO:0044839	cell cycle G2/M phase transition
GO:0043488	0.517769	1.80791	0.483347	1.69365	0.459771	1.61986	BP	GO:0043488	regulation of mRNA stability
GO:0017116	0.876257	2.04821	0.871023	1.95687	0.883896	2.0649	MF	GO:0017116	single-stranded DNA helicase activity
GO:0007051	0.528617	1.84712	0.523727	1.82928	0.55181	1.93961	BP	GO:0007051	spindle organization
GO:0009062	-0.550713	-1.91764	-0.583817	-1.95268	-0.576276	-1.92816	BP	GO:0009062	fatty acid catabolic process
GO:0000776	0.571231	1.91137	0.585098	1.97825	0.607615	2.05768	CC	GO:0000776	kinetochore
GO:0051054	0.513047	1.79803	0.524604	1.84627	0.502613	1.78199	BP	GO:0051054	positive regulation of DNA metabolic process
GO:1904645	0.701382	2.04787	0.669327	1.96974	0.639081	1.921	BP	GO:1904645	response to amyloid-beta
GO:0022616	0.796536	2.06281	0.77686	2.02763	0.790242	2.09082	BP	GO:0022616	DNA strand elongation
GO:0000794	0.618173	1.96299	0.611478	1.92699	0.636813	2.03124	CC	GO:0000794	condensed nuclear chromosome
GO:0019395	-0.550035	-1.90796	-0.570617	-1.90088	-0.550561	-1.8338	BP	GO:0019395	fatty acid oxidation
GO:0001676	-0.55679	-1.92862	-0.625155	-2.08042	-0.587594	-1.94312	BP	GO:0001676	long-chain fatty acid metabolic process
GO:2000278	0.58833	1.93017	0.571293	1.88591	0.545847	1.83053	BP	GO:2000278	regulation of DNA biosynthetic process
GO:0045069	0.602162	1.93098	0.594562	1.91294	0.56534	1.85984	BP	GO:0045069	regulation of viral genome replication
GO:0031674	-0.515414	-1.86861	-0.525627	-1.81219	-0.516262	-1.78269	CC	GO:0031674	I band
GO:0001706	0.697892	2.01392	0.665967	1.94509	0.671662	2.00025	BP	GO:0001706	endoderm formation
GO:0034440	-0.541799	-1.9023	-0.5518	-1.8593	-0.546862	-1.84049	BP	GO:0034440	lipid oxidation
GO:0022411	0.403841	1.5583	0.369357	1.45726	0.351129	1.3952	BP	GO:0022411	cellular component disassembly
GO:0051031	0.741422	2.02523	0.683254	1.88414	0.722379	2.03373	BP	GO:0051031	tRNA transport
GO:0000038	-0.776921	-2.07314	-0.794682	-2.07222	-0.789754	-1.99625	BP	GO:0000038	very long-chain fatty acid metabolic process
GO:0007088	0.526496	1.81524	0.526349	1.82619	0.545523	1.89415	BP	GO:0007088	regulation of mitotic nuclear division
GO:0016458	0.515489	1.80958	0.50911	1.80018	0.49856	1.77327	BP	GO:0016458	gene silencing
GO:0120254	-0.534491	-1.88278	-0.553356	-1.86885	-0.55056	-1.8572	BP	GO:0120254	olefinic compound metabolic process
GO:0030261	0.757349	2.02284	0.756496	2.03482	0.781761	2.12043	BP	GO:0030261	chromosome condensation
GO:0000086	0.471458	1.71309	0.464376	1.71483	0.48526	1.79314	BP	GO:0000086	G2/M transition of mitotic cell cycle
GO:0043487	0.512355	1.79589	0.478372	1.68379	0.456232	1.61345	BP	GO:0043487	regulation of RNA stability
GO:0019058	0.437608	1.62726	0.430041	1.63533	0.403074	1.5444	BP	GO:0019058	viral life cycle
GO:1905369	0.650174	1.98062	0.603831	1.87767	0.607067	1.88166	CC	GO:1905369	endopeptidase complex
GO:0140053	0.55412	1.85222	0.517311	1.74668	0.556985	1.88963	BP	GO:0140053	mitochondrial gene expression
GO:0034728	0.587305	1.91274	0.575887	1.89004	0.612048	2.04006	BP	GO:0034728	nucleosome organization
GO:0000083	0.737012	2.00674	0.689522	1.88983	0.704226	1.9661	BP	GO:0000083	regulation of transcription involved in G1/S transition of mitotic cell cycle
GO:0019985	0.737113	2.00702	0.748901	2.05258	0.730278	2.03884	BP	GO:0019985	translesion synthesis
GO:0006271	0.839393	2.04953	0.808286	1.93398	0.823501	2.0571	BP	GO:0006271	DNA strand elongation involved in DNA replication
GO:0097064	0.721541	1.98919	0.659851	1.83527	0.713127	2.02642	BP	GO:0097064	ncRNA export from nucleus
GO:0042476	0.558345	1.87536	0.475414	1.60312	0.466185	1.5821	BP	GO:0042476	odontogenesis
GO:0035194	0.553268	1.8435	0.523283	1.76678	0.516748	1.7482	BP	GO:0035194	post-transcriptional gene silencing by RNA
GO:0007052	0.571235	1.8908	0.563696	1.87575	0.601036	2.01974	BP	GO:0007052	mitotic spindle organization
GO:0022618	0.50083	1.75668	0.468511	1.65374	0.525241	1.8674	BP	GO:0022618	ribonucleoprotein complex assembly
GO:1902750	0.592623	1.92294	0.581516	1.89755	0.593049	1.96291	BP	GO:1902750	negative regulation of cell cycle G2/M phase transition
GO:0000922	0.538479	1.82922	0.523267	1.79692	0.532768	1.83218	CC	GO:0000922	spindle pole
GO:0034399	0.543202	1.83368	0.544545	1.86491	0.552306	1.89905	CC	GO:0034399	nuclear periphery
GO:0008608	0.765218	2.00388	0.766201	2.01202	0.78837	2.08856	BP	GO:0008608	attachment of spindle microtubules to kinetochore
GO:0043903	0.491703	1.76681	0.460689	1.67677	0.412297	1.5047	BP	GO:0043903	regulation of symbiotic process
GO:0050792	0.490876	1.74897	0.459175	1.65528	0.414083	1.5009	BP	GO:0050792	regulation of viral process
GO:0006406	0.590637	1.91225	0.550739	1.79117	0.598808	1.9834	BP	GO:0006406	mRNA export from nucleus
GO:0071427	0.590637	1.91225	0.550739	1.79117	0.598808	1.9834	BP	GO:0071427	mRNA-containing ribonucleoprotein complex export from nucleus
GO:1905818	0.65468	1.97326	0.66231	2.02162	0.688677	2.11428	BP	GO:1905818	regulation of chromosome separation
GO:0019079	0.547741	1.83089	0.543566	1.83533	0.506682	1.71898	BP	GO:0019079	viral genome replication
GO:0010833	0.628272	1.9489	0.612539	1.90684	0.611975	1.90659	BP	GO:0010833	telomere maintenance via telomere lengthening
GO:0034502	0.644318	1.96278	0.645783	2.00813	0.674155	2.0896	BP	GO:0034502	protein localization to chromosome
GO:0051783	0.508323	1.78244	0.499071	1.75217	0.523529	1.8511	BP	GO:0051783	regulation of nuclear division
GO:1903046	0.540126	1.84594	0.544681	1.87616	0.55152	1.89948	BP	GO:1903046	meiotic cell cycle process
GO:0003012	-0.366769	-1.51337	-0.366844	-1.46372	-0.37916	-1.49609	BP	GO:0003012	muscle system process
GO:0008009	0.695839	1.96215	0.71734	2.05604	0.63941	1.84627	MF	GO:0008009	chemokine activity
GO:0002200	0.627016	1.945	0.597457	1.85989	0.618457	1.92678	BP	GO:0002200	somatic diversification of immune receptors
GO:1901532	0.591721	1.89561	0.536022	1.71717	0.51578	1.67614	BP	GO:1901532	regulation of hematopoietic progenitor cell differentiation
GO:0034504	0.462894	1.69724	0.462011	1.71168	0.462895	1.72283	BP	GO:0034504	protein localization to nucleus
GO:1901568	-0.483957	-1.77903	-0.501918	-1.76891	-0.502032	-1.74854	BP	GO:1901568	fatty acid derivative metabolic process
GO:0002478	0.500046	1.75793	0.471617	1.66222	0.458942	1.63309	BP	GO:0002478	antigen processing and presentation of exogenous peptide antigen
GO:0016441	0.552893	1.84905	0.521124	1.76233	0.512349	1.7331	BP	GO:0016441	posttranscriptional gene silencing
GO:0006364	0.497452	1.75696	0.475928	1.69325	0.504195	1.803	BP	GO:0006364	rRNA processing
GO:0009451	0.547674	1.82486	0.516585	1.74416	0.536016	1.81339	BP	GO:0009451	RNA modification
GO:0050691	0.758702	1.98681	0.747615	1.96322	0.676901	1.79325	BP	GO:0050691	regulation of defense response to virus by host
GO:0033048	0.701677	1.99258	0.701276	2.01588	0.720085	2.08839	BP	GO:0033048	negative regulation of mitotic sister chromatid segregation
GO:0071826	0.497364	1.75548	0.463814	1.65057	0.509517	1.82347	BP	GO:0071826	ribonucleoprotein complex subunit organization
GO:0051170	0.50767	1.7709	0.51603	1.80064	0.513727	1.80376	BP	GO:0051170	import into nucleus
GO:0000727	0.886801	1.94893	0.890761	1.89741	0.906065	1.96616	BP	GO:0000727	double-strand break repair via break-induced replication
GO:1903311	0.438819	1.62547	0.417262	1.56993	0.410496	1.55804	BP	GO:1903311	regulation of mRNA metabolic process
GO:0010965	0.666357	1.98176	0.680384	2.03825	0.701593	2.123	BP	GO:0010965	regulation of mitotic sister chromatid separation
GO:1902036	0.604126	1.89534	0.545573	1.71786	0.526779	1.66643	BP	GO:1902036	regulation of hematopoietic stem cell differentiation
GO:0008015	-0.342181	-1.4259	-0.345392	-1.39626	-0.343571	-1.37308	BP	GO:0008015	blood circulation
GO:0006409	0.736674	1.99435	0.677763	1.8507	0.715175	1.99737	BP	GO:0006409	tRNA export from nucleus
GO:0071431	0.736674	1.99435	0.677763	1.8507	0.715175	1.99737	BP	GO:0071431	tRNA-containing ribonucleoprotein complex export from nucleus
GO:0007091	0.668525	1.96413	0.682401	2.01239	0.704378	2.11919	BP	GO:0007091	metaphase/anaphase transition of mitotic cell cycle
GO:0051306	0.653625	1.95634	0.668977	2.01542	0.691216	2.10784	BP	GO:0051306	mitotic sister chromatid separation
GO:0031570	0.518176	1.77929	0.501408	1.73243	0.538565	1.8588	BP	GO:0031570	DNA integrity checkpoint
GO:0140013	0.535621	1.80208	0.542158	1.84221	0.549435	1.87133	BP	GO:0140013	meiotic nuclear division
GO:0044784	0.665515	1.95225	0.677253	2.01913	0.700057	2.11093	BP	GO:0044784	metaphase/anaphase transition of cell cycle
GO:0009913	-0.4305	-1.66627	-0.542701	-2.00196	-0.592238	-2.1619	BP	GO:0009913	epidermal cell differentiation
GO:0019884	0.484984	1.71073	0.44737	1.59577	0.441236	1.5766	BP	GO:0019884	antigen processing and presentation of exogenous antigen
GO:0042393	0.48537	1.72064	0.462601	1.66461	0.483885	1.74712	MF	GO:0042393	histone binding
GO:0030216	-0.451903	-1.68895	-0.573154	-2.0497	-0.627122	-2.19847	BP	GO:0030216	keratinocyte differentiation
GO:1902969	0.850025	1.98689	0.824991	1.85346	0.846091	1.97658	BP	GO:1902969	mitotic DNA replication
GO:0061448	0.459519	1.67001	0.437236	1.61262	0.386025	1.42767	BP	GO:0061448	connective tissue development
GO:0030178	0.491454	1.73578	0.437263	1.55569	0.424122	1.51666	BP	GO:0030178	negative regulation of Wnt signaling pathway
GO:0007492	0.610471	1.90811	0.580128	1.81907	0.580176	1.82783	BP	GO:0007492	endoderm development
GO:0090329	0.681513	1.96612	0.663982	1.92987	0.685233	2.02018	BP	GO:0090329	regulation of DNA-dependent DNA replication
GO:0003688	0.787245	1.98392	0.775119	1.93696	0.804473	2.09782	MF	GO:0003688	DNA replication origin binding
GO:2000027	0.456327	1.65811	0.432649	1.59767	0.407918	1.50735	BP	GO:2000027	regulation of animal organ morphogenesis
GO:0060968	0.585389	1.8743	0.563066	1.80948	0.531177	1.73991	BP	GO:0060968	regulation of gene silencing
GO:0043596	0.702494	1.93668	0.707774	1.96856	0.712158	2.02367	CC	GO:0043596	nuclear replication fork
GO:0010972	0.580011	1.8581	0.57446	1.84031	0.587185	1.90819	BP	GO:0010972	negative regulation of G2/M transition of mitotic cell cycle
GO:0090090	0.504284	1.75609	0.457217	1.59294	0.444031	1.55926	BP	GO:0090090	negative regulation of canonical Wnt signaling pathway
GO:1902100	0.701535	1.93404	0.708759	1.9713	0.729603	2.07324	BP	GO:1902100	negative regulation of metaphase/anaphase transition of cell cycle
GO:0140101	0.614885	1.91104	0.567491	1.76569	0.613008	1.91328	MF	GO:0140101	catalytic activity, acting on a tRNA
GO:0030018	-0.507923	-1.81892	-0.506185	-1.73177	-0.499607	-1.70431	CC	GO:0030018	Z disc
GO:0032993	0.549199	1.82637	0.541767	1.81565	0.531807	1.80358	CC	GO:0032993	protein-DNA complex
GO:0051784	0.64013	1.9294	0.635812	1.94074	0.664683	2.04062	BP	GO:0051784	negative regulation of nuclear division
GO:0008156	0.739301	1.95995	0.729093	1.9503	0.731914	1.96515	BP	GO:0008156	negative regulation of DNA replication
GO:0000731	0.693282	1.98443	0.717947	2.07431	0.701513	2.04173	BP	GO:0000731	DNA synthesis involved in DNA repair
GO:0031497	0.556762	1.83243	0.555079	1.84047	0.588451	1.97419	BP	GO:0031497	chromatin assembly
GO:0034508	0.729054	1.97373	0.761589	2.07959	0.743765	2.07721	BP	GO:0034508	centromere complex assembly
GO:1902099	0.660833	1.94153	0.671946	1.98156	0.693667	2.08696	BP	GO:1902099	regulation of metaphase/anaphase transition of cell cycle
GO:0006334	0.637835	1.92971	0.627383	1.92928	0.651696	1.99571	BP	GO:0006334	nucleosome assembly
GO:1905819	0.698156	1.96243	0.704694	2.00265	0.721497	2.08231	BP	GO:1905819	negative regulation of chromosome separation
GO:0031047	0.527961	1.78938	0.501441	1.71699	0.48848	1.67466	BP	GO:0031047	gene silencing by RNA
GO:1902850	0.531382	1.80218	0.530359	1.81951	0.556736	1.91671	BP	GO:1902850	microtubule cytoskeleton organization involved in mitosis
GO:0016072	0.487136	1.71696	0.471735	1.68163	0.49885	1.78733	BP	GO:0016072	rRNA metabolic process
GO:0008173	0.672982	1.94151	0.630493	1.83253	0.660233	1.94648	MF	GO:0008173	RNA methyltransferase activity
GO:0006333	0.523043	1.77279	0.520913	1.77789	0.556367	1.90818	BP	GO:0006333	chromatin assembly or disassembly
GO:0000502	0.642717	1.93282	0.60234	1.8506	0.602464	1.84865	CC	GO:0000502	proteasome complex
GO:2000816	0.702342	1.97146	0.712218	2.00558	0.72793	2.0735	BP	GO:2000816	negative regulation of mitotic sister chromatid separation
GO:0007568	0.429934	1.59258	0.411985	1.54708	0.385278	1.46048	BP	GO:0007568	aging
GO:0061695	0.457333	1.65676	0.449462	1.65409	0.445933	1.65177	CC	GO:0061695	transferase complex, transferring phosphorus-containing groups
GO:0060071	0.557521	1.82049	0.51801	1.70374	0.53245	1.77221	BP	GO:0060071	Wnt signaling pathway, planar cell polarity pathway
GO:0071013	0.599481	1.87376	0.586769	1.83989	0.632137	1.99153	CC	GO:0071013	catalytic step 2 spliceosome
GO:0046540	0.74717	1.97835	0.720923	1.91647	0.738585	1.96606	CC	GO:0046540	U4/U6 x U5 tri-snRNP complex
GO:0097526	0.74717	1.97835	0.720923	1.91647	0.738585	1.96606	CC	GO:0097526	spliceosomal tri-snRNP complex
GO:0035195	0.550305	1.82152	0.527143	1.75412	0.51613	1.73442	BP	GO:0035195	gene silencing by miRNA
GO:0034655	0.392551	1.51088	0.353485	1.39134	0.347412	1.3729	BP	GO:0034655	nucleobase-containing compound catabolic process
GO:0006690	-0.517492	-1.80195	-0.554144	-1.85344	-0.566045	-1.89392	BP	GO:0006690	icosanoid metabolic process
GO:0090175	0.548034	1.79016	0.510015	1.67928	0.523576	1.74625	BP	GO:0090175	regulation of establishment of planar polarity
GO:0045839	0.646203	1.90561	0.653187	1.95478	0.67749	2.04142	BP	GO:0045839	negative regulation of mitotic nuclear division
GO:0006278	0.615551	1.86624	0.594326	1.83869	0.583567	1.80062	BP	GO:0006278	RNA-dependent DNA biosynthetic process
GO:0005684	0.581496	1.84652	0.574582	1.81072	0.605497	1.93135	CC	GO:0005684	U2-type spliceosomal complex
GO:0002562	0.633066	1.90811	0.58963	1.79977	0.624775	1.9181	BP	GO:0002562	somatic diversification of immune receptors via germline recombination within a single locus
GO:0016444	0.633066	1.90811	0.58963	1.79977	0.624775	1.9181	BP	GO:0016444	somatic cell DNA recombination
GO:0000226	0.390044	1.50132	0.368338	1.44843	0.374372	1.47655	BP	GO:0000226	microtubule cytoskeleton organization
GO:0001533	-0.688773	-1.98912	-0.746275	-2.09379	-0.838895	-2.33028	CC	GO:0001533	cornified envelope
GO:0045841	0.706098	1.92874	0.716657	1.97626	0.736458	2.07336	BP	GO:0045841	negative regulation of mitotic metaphase/anaphase transition
GO:0016054	-0.402676	-1.58319	-0.446305	-1.6739	-0.432998	-1.60936	BP	GO:0016054	organic acid catabolic process
GO:0046395	-0.402676	-1.58319	-0.446305	-1.6739	-0.432998	-1.60936	BP	GO:0046395	carboxylic acid catabolic process
GO:0051988	0.869184	1.91022	0.863513	1.83937	0.844092	1.83168	BP	GO:0051988	regulation of attachment of spindle microtubules to kinetochore
GO:0090305	0.443674	1.61347	0.425683	1.5714	0.447174	1.65163	BP	GO:0090305	nucleic acid phosphodiester bond hydrolysis
GO:0034605	0.530049	1.77265	0.474906	1.60603	0.505947	1.71144	BP	GO:0034605	cellular response to heat
GO:0043114	-0.658784	-1.97877	-0.632557	-1.82296	-0.644946	-1.86068	BP	GO:0043114	regulation of vascular permeability
GO:0048002	0.476891	1.69012	0.45871	1.6417	0.442434	1.59399	BP	GO:0048002	antigen processing and presentation of peptide antigen
GO:0030071	0.663907	1.93846	0.677191	1.99288	0.698066	2.0983	BP	GO:0030071	regulation of mitotic metaphase/anaphase transition
GO:0006401	0.415008	1.55685	0.37545	1.43545	0.389804	1.5065	BP	GO:0006401	RNA catabolic process
GO:0001704	0.535355	1.78156	0.499655	1.67117	0.477512	1.6105	BP	GO:0001704	formation of primary germ layer
GO:0044242	-0.435745	-1.66658	-0.432478	-1.57748	-0.443414	-1.58343	BP	GO:0044242	cellular lipid catabolic process
GO:0009262	0.71895	1.92028	0.662995	1.78332	0.720313	1.95376	BP	GO:0009262	deoxyribonucleotide metabolic process
GO:0001649	0.470104	1.66846	0.452481	1.62447	0.421058	1.51758	BP	GO:0001649	osteoblast differentiation
GO:0043486	0.702554	1.91906	0.685874	1.89137	0.721806	2.03211	BP	GO:0043486	histone exchange
GO:0060147	0.574746	1.82112	0.538904	1.70156	0.512147	1.63515	BP	GO:0060147	regulation of posttranscriptional gene silencing
GO:0060966	0.574746	1.82112	0.538904	1.70156	0.512147	1.63515	BP	GO:0060966	regulation of gene silencing by RNA
GO:0006936	-0.369053	-1.49971	-0.383129	-1.48312	-0.390012	-1.50238	BP	GO:0006936	muscle contraction
GO:0033238	0.574049	1.81891	0.543306	1.71546	0.51005	1.62846	BP	GO:0033238	regulation of cellular amine metabolic process
GO:0007004	0.628218	1.88922	0.606141	1.86228	0.597538	1.83353	BP	GO:0007004	telomere maintenance via telomerase
GO:0042769	0.697647	1.90566	0.651069	1.79539	0.657238	1.85034	BP	GO:0042769	DNA damage response, detection of DNA damage
GO:0061013	0.479401	1.69392	0.445863	1.58306	0.419866	1.50021	BP	GO:0061013	regulation of mRNA catabolic process
GO:0003725	0.589129	1.84141	0.56907	1.78439	0.563697	1.77591	MF	GO:0003725	double-stranded RNA binding
GO:0006275	0.550726	1.8068	0.549212	1.81302	0.526607	1.76601	BP	GO:0006275	regulation of DNA replication
GO:0090068	0.437773	1.60857	0.413555	1.53148	0.423469	1.57862	BP	GO:0090068	positive regulation of cell cycle process
GO:0016363	0.541451	1.79025	0.547982	1.81978	0.549995	1.84126	CC	GO:0016363	nuclear matrix
GO:0070182	0.803725	1.92947	0.816984	1.94023	0.833765	2.05047	MF	GO:0070182	DNA polymerase binding
GO:0051985	0.647588	1.85938	0.649938	1.88993	0.674579	1.97263	BP	GO:0051985	negative regulation of chromosome segregation
GO:0048306	-0.55023	-1.81715	-0.647498	-2.05839	-0.663782	-2.10043	MF	GO:0048306	calcium-dependent protein binding
GO:0070192	0.651066	1.87879	0.632343	1.84689	0.667411	1.98759	BP	GO:0070192	chromosome organization involved in meiotic cell cycle
GO:0030282	0.538283	1.77658	0.492482	1.6377	0.462505	1.55396	BP	GO:0030282	bone mineralization
GO:0000018	0.578179	1.8129	0.558084	1.75074	0.592354	1.86754	BP	GO:0000018	regulation of DNA recombination
GO:0016634	-0.869625	-1.93204	-0.838545	-1.83276	-0.838072	-1.78066	MF	GO:0016634	oxidoreductase activity, acting on the CH-CH group of donors, oxygen as acceptor
GO:0043044	0.602517	1.84374	0.595338	1.84981	0.626862	1.9464	BP	GO:0043044	ATP-dependent chromatin remodeling
GO:0006635	-0.563213	-1.84879	-0.587196	-1.86417	-0.576322	-1.82545	BP	GO:0006635	fatty acid beta-oxidation
GO:0010212	0.512763	1.7377	0.508845	1.7405	0.531277	1.82157	BP	GO:0010212	response to ionizing radiation
GO:0008395	-0.674618	-1.94825	-0.698649	-1.96017	-0.680475	-1.89022	MF	GO:0008395	steroid hydroxylase activity
GO:0031581	0.838042	1.88002	0.805802	1.75852	0.812853	1.8335	BP	GO:0031581	hemidesmosome assembly
GO:0000387	0.67338	1.85642	0.665584	1.85122	0.661489	1.87969	BP	GO:0000387	spliceosomal snRNP assembly
GO:0060964	0.566491	1.79107	0.532003	1.67325	0.508991	1.62136	BP	GO:0060964	regulation of gene silencing by miRNA
GO:0017038	0.464728	1.63851	0.471599	1.67467	0.469927	1.67444	BP	GO:0017038	protein import
GO:0002244	0.492223	1.71303	0.461903	1.60688	0.436771	1.53246	BP	GO:0002244	hematopoietic progenitor cell differentiation
GO:0034724	0.701847	1.89668	0.719383	1.95693	0.748523	2.07163	BP	GO:0034724	DNA replication-independent nucleosome organization
GO:0003013	-0.332107	-1.39197	-0.340342	-1.38014	-0.335379	-1.34431	BP	GO:0003013	circulatory system process
GO:2000104	0.809727	1.92517	0.814536	1.8622	0.807024	1.92086	BP	GO:2000104	negative regulation of DNA-dependent DNA replication
GO:0032210	0.641864	1.84295	0.649116	1.88754	0.615658	1.80033	BP	GO:0032210	regulation of telomere maintenance via telomerase
GO:0043687	0.416025	1.54972	0.382464	1.44392	0.398882	1.52111	BP	GO:0043687	post-translational protein modification
GO:0003682	0.378835	1.47207	0.375672	1.48485	0.376725	1.50093	MF	GO:0003682	chromatin binding
GO:0003174	0.872114	1.85081	0.891828	1.84701	0.812453	1.7257	BP	GO:0003174	mitral valve development
GO:0009113	0.872067	1.85071	0.860028	1.78115	0.871846	1.85185	BP	GO:0009113	purine nucleobase biosynthetic process
GO:0061982	0.554331	1.7739	0.574218	1.82967	0.585834	1.89672	BP	GO:0061982	meiosis I cell cycle process
GO:0016445	0.619096	1.85299	0.606865	1.82829	0.607218	1.85169	BP	GO:0016445	somatic diversification of immunoglobulins
GO:0016447	0.635515	1.85518	0.61509	1.80139	0.613995	1.83427	BP	GO:0016447	somatic recombination of immunoglobulin gene segments
GO:0015175	0.721225	1.88867	0.755101	1.98288	0.680861	1.80374	MF	GO:0015175	neutral amino acid transmembrane transporter activity
GO:0001736	0.52475	1.74506	0.50163	1.68114	0.512144	1.7369	BP	GO:0001736	establishment of planar polarity
GO:0007164	0.52475	1.74506	0.50163	1.68114	0.512144	1.7369	BP	GO:0007164	establishment of tissue polarity
GO:0032543	0.549023	1.78146	0.526081	1.71666	0.576337	1.9076	BP	GO:0032543	mitochondrial translation
GO:0003181	0.750323	1.92532	0.729044	1.84363	0.697537	1.83831	BP	GO:0003181	atrioventricular valve morphogenesis
GO:0019882	0.441829	1.59881	0.426765	1.56481	0.400987	1.47829	BP	GO:0019882	antigen processing and presentation
GO:1904356	0.646301	1.88705	0.663147	1.95155	0.637443	1.91607	BP	GO:1904356	regulation of telomere maintenance via telomere lengthening
GO:0007094	0.694798	1.88099	0.702172	1.91735	0.724251	2.02271	BP	GO:0007094	mitotic spindle assembly checkpoint
GO:0031577	0.694798	1.88099	0.702172	1.91735	0.724251	2.02271	BP	GO:0031577	spindle checkpoint
GO:0071173	0.694798	1.88099	0.702172	1.91735	0.724251	2.02271	BP	GO:0071173	spindle assembly checkpoint
GO:0071174	0.694798	1.88099	0.702172	1.91735	0.724251	2.02271	BP	GO:0071174	mitotic spindle checkpoint
GO:0006284	0.664894	1.86894	0.646216	1.83647	0.655783	1.89265	BP	GO:0006284	base-excision repair
GO:0006400	0.610153	1.83905	0.583498	1.78106	0.626177	1.9224	BP	GO:0006400	tRNA modification
GO:0016712	-0.670022	-1.91334	-0.735764	-2.03348	-0.720755	-1.94842	MF	GO:0016712	oxidoreductase activity, acting on paired donors, with incorporation or reduction of molecular oxygen, reduced flavin or flavoprotein as one donor, and incorporation of one atom of oxygen
GO:0042770	0.506494	1.70322	0.49349	1.67735	0.500221	1.70177	BP	GO:0042770	signal transduction in response to DNA damage
GO:0005635	0.389865	1.48808	0.383274	1.48885	0.397714	1.54485	CC	GO:0005635	nuclear envelope
GO:0034308	-0.53143	-1.78207	-0.533046	-1.71792	-0.516607	-1.66311	BP	GO:0034308	primary alcohol metabolic process
GO:0006353	0.59357	1.80819	0.553092	1.71989	0.59921	1.8573	BP	GO:0006353	DNA-templated transcription, termination
GO:0019369	-0.588438	-1.83208	-0.637146	-1.9239	-0.625475	-1.8509	BP	GO:0019369	arachidonic acid metabolic process
GO:0006298	0.691208	1.86793	0.64076	1.74305	0.718472	1.98846	BP	GO:0006298	mismatch repair
GO:0016891	0.742273	1.9108	0.69227	1.79079	0.73494	1.94576	MF	GO:0016891	endoribonuclease activity, producing 5'-phosphomonoesters
GO:0072686	0.51237	1.71442	0.54127	1.83007	0.53527	1.81269	CC	GO:0072686	mitotic spindle
GO:0071005	0.632362	1.81567	0.633702	1.84272	0.664709	1.94377	CC	GO:0071005	U2-type precatalytic spliceosome
GO:0070330	-0.710033	-1.89466	-0.754556	-1.96759	-0.724258	-1.8307	MF	GO:0070330	aromatase activity
GO:0018205	0.396825	1.49172	0.407509	1.56141	0.416515	1.61048	BP	GO:0018205	peptidyl-lysine modification
GO:0045132	0.603469	1.8189	0.595978	1.81915	0.616151	1.89163	BP	GO:0045132	meiotic chromosome segregation
GO:1902476	-0.51771	-1.75198	-0.557711	-1.81948	-0.538556	-1.74769	BP	GO:1902476	chloride transmembrane transport
GO:0006297	0.742198	1.90447	0.703877	1.77998	0.719001	1.89487	BP	GO:0006297	nucleotide-excision repair, DNA gap filling
GO:0001510	0.606805	1.82482	0.556557	1.70994	0.587116	1.80155	BP	GO:0001510	RNA methylation
GO:0000076	0.826884	1.89246	0.797482	1.77934	0.861703	1.98179	BP	GO:0000076	DNA replication checkpoint
GO:0071229	0.585577	1.79191	0.57192	1.77705	0.55504	1.7234	BP	GO:0071229	cellular response to acid chemical
GO:0033046	0.651202	1.86399	0.656542	1.89689	0.680652	1.98101	BP	GO:0033046	negative regulation of sister chromatid segregation
GO:0003684	0.590022	1.79738	0.637927	1.9837	0.663098	2.05533	MF	GO:0003684	damaged DNA binding
GO:0002474	0.522207	1.7187	0.494245	1.63877	0.481555	1.61556	BP	GO:0002474	antigen processing and presentation of peptide antigen via MHC class I
GO:1903900	0.488577	1.67017	0.476762	1.63918	0.433129	1.49067	BP	GO:1903900	regulation of viral life cycle
GO:0001738	0.501379	1.70043	0.484747	1.66303	0.492965	1.69716	BP	GO:0001738	morphogenesis of a polarized epithelium
GO:0046112	0.777928	1.89946	0.749654	1.79369	0.764396	1.90946	BP	GO:0046112	nucleobase biosynthetic process
GO:0007127	0.556421	1.76305	0.579768	1.83059	0.590708	1.88598	BP	GO:0007127	meiosis I
GO:0071230	0.598703	1.80454	0.591632	1.80589	0.576346	1.76942	BP	GO:0071230	cellular response to amino acid stimulus
GO:0071011	0.63234	1.82426	0.62487	1.81619	0.659788	1.94517	CC	GO:0071011	precatalytic spliceosome
GO:0034708	0.537028	1.74677	0.52963	1.73499	0.552349	1.83297	CC	GO:0034708	methyltransferase complex
GO:0010499	0.753761	1.84801	0.787618	1.90251	0.751681	1.90859	BP	GO:0010499	proteasomal ubiquitin-independent protein catabolic process
GO:0030496	0.468359	1.61804	0.466777	1.61933	0.469252	1.63398	CC	GO:0030496	midbody
GO:0003777	0.59567	1.7954	0.630939	1.92586	0.60646	1.86187	MF	GO:0003777	microtubule motor activity
GO:0002204	0.642173	1.8236	0.609696	1.75262	0.618085	1.79257	BP	GO:0002204	somatic recombination of immunoglobulin genes involved in immune response
GO:0002208	0.642173	1.8236	0.609696	1.75262	0.618085	1.79257	BP	GO:0002208	somatic diversification of immunoglobulins involved in immune response
GO:0045190	0.642173	1.8236	0.609696	1.75262	0.618085	1.79257	BP	GO:0045190	isotype switching
GO:0032204	0.58328	1.79594	0.587588	1.8258	0.587694	1.82652	BP	GO:0032204	regulation of telomere maintenance
GO:0036257	-0.72505	-1.93086	-0.707253	-1.82765	-0.741853	-1.8454	BP	GO:0036257	multivesicular body organization
GO:0008201	0.480456	1.64641	0.473773	1.63432	0.474004	1.6362	MF	GO:0008201	heparin binding
GO:0005876	0.600172	1.79635	0.588158	1.77194	0.602229	1.83648	CC	GO:0005876	spindle microtubule
GO:2001252	0.462101	1.6092	0.468152	1.63104	0.493092	1.73154	BP	GO:2001252	positive regulation of chromosome organization
GO:0004298	0.7712	1.88303	0.784725	1.87761	0.771474	1.92713	MF	GO:0004298	threonine-type endopeptidase activity
GO:1900182	0.549133	1.72281	0.558699	1.7592	0.558986	1.76832	BP	GO:1900182	positive regulation of protein localization to nucleus
GO:0051383	0.789218	1.88818	0.799916	1.85701	0.793385	1.92029	BP	GO:0051383	kinetochore organization
GO:0016616	-0.478942	-1.65813	-0.512493	-1.70269	-0.495442	-1.63965	MF	GO:0016616	oxidoreductase activity, acting on the CH-OH group of donors, NAD or NADP as acceptor
GO:0005874	0.396141	1.48226	0.399897	1.5254	0.386313	1.48649	CC	GO:0005874	microtubule
GO:0051225	0.528963	1.71637	0.518702	1.69258	0.543777	1.79983	BP	GO:0051225	spindle assembly
GO:0004029	-0.795503	-1.92231	-0.841866	-1.98523	-0.814302	-1.87252	MF	GO:0004029	aldehyde dehydrogenase (NAD+) activity
GO:0004030	-0.795503	-1.92231	-0.841866	-1.98523	-0.814302	-1.87252	MF	GO:0004030	aldehyde dehydrogenase [NAD(P)+] activity
GO:0033262	0.786368	1.86963	0.789968	1.80603	0.794906	1.89202	BP	GO:0033262	regulation of nuclear cell cycle DNA replication
GO:0005839	0.775621	1.862	0.778049	1.84777	0.763777	1.87835	CC	GO:0005839	proteasome core complex
GO:0015108	-0.502175	-1.71496	-0.538913	-1.77566	-0.520256	-1.70109	MF	GO:0015108	chloride transmembrane transporter activity
GO:0006336	0.693517	1.86733	0.70958	1.9196	0.743663	2.03447	BP	GO:0006336	DNA replication-independent nucleosome assembly
GO:0017144	-0.615375	-1.84839	-0.703629	-2.02778	-0.706098	-2.03711	BP	GO:0017144	drug metabolic process
GO:0036258	-0.715969	-1.88607	-0.707083	-1.80364	-0.759181	-1.86063	BP	GO:0036258	multivesicular body assembly
GO:0042133	-0.687282	-1.87327	-0.700434	-1.86191	-0.677587	-1.76084	BP	GO:0042133	neurotransmitter metabolic process
GO:0006606	0.473838	1.62373	0.484852	1.67253	0.481885	1.66341	BP	GO:0006606	protein import into nucleus
GO:0042575	0.763353	1.86387	0.75118	1.79734	0.735234	1.83661	CC	GO:0042575	DNA polymerase complex
GO:1905508	0.670658	1.81239	0.650392	1.76925	0.639109	1.76881	BP	GO:1905508	protein localization to microtubule organizing center
GO:0004527	0.570959	1.73105	0.579846	1.79389	0.596527	1.84061	MF	GO:0004527	exonuclease activity
GO:2001020	0.440271	1.55436	0.424016	1.50587	0.443555	1.58432	BP	GO:2001020	regulation of response to DNA damage stimulus
GO:0016579	0.42596	1.54121	0.416357	1.53155	0.395985	1.46089	BP	GO:0016579	protein deubiquitination
GO:0000460	0.667627	1.80743	0.649519	1.77357	0.665991	1.86	BP	GO:0000460	maturation of 5.8S rRNA
GO:0001101	0.487634	1.63499	0.47112	1.59461	0.463036	1.56913	BP	GO:0001101	response to acid chemical
GO:1904358	0.667817	1.80472	0.678844	1.84665	0.668367	1.84979	BP	GO:1904358	positive regulation of telomere maintenance via telomere lengthening
GO:0006805	-0.489239	-1.69463	-0.52913	-1.76086	-0.515332	-1.70416	BP	GO:0006805	xenobiotic metabolic process
GO:0032467	0.666813	1.802	0.642785	1.74856	0.652579	1.80609	BP	GO:0032467	positive regulation of cytokinesis
GO:0044774	0.521164	1.69107	0.49936	1.62947	0.548318	1.81486	BP	GO:0044774	mitotic DNA integrity checkpoint
GO:1901681	0.421222	1.51804	0.408896	1.49838	0.412672	1.51529	MF	GO:1901681	sulfur compound binding
GO:0061037	0.719877	1.85315	0.692111	1.79038	0.690111	1.82708	BP	GO:0061037	negative regulation of cartilage development
GO:0031424	-0.483249	-1.6684	-0.633474	-2.10752	-0.68484	-2.27172	BP	GO:0031424	keratinization
GO:0044282	-0.335421	-1.37415	-0.364895	-1.44829	-0.36641	-1.43947	BP	GO:0044282	small molecule catabolic process
GO:0031055	0.720066	1.84768	0.733028	1.8537	0.747392	1.9697	BP	GO:0031055	chromatin remodeling at centromere
GO:0044380	0.587058	1.73119	0.59129	1.76954	0.565337	1.70348	BP	GO:0044380	protein localization to cytoskeleton
GO:0005520	0.737002	1.80692	0.776491	1.87564	0.732744	1.86051	MF	GO:0005520	insulin-like growth factor binding
GO:0034080	0.711045	1.79189	0.721638	1.80332	0.744038	1.94023	BP	GO:0034080	CENP-A containing nucleosome assembly
GO:0061641	0.711045	1.79189	0.721638	1.80332	0.744038	1.94023	BP	GO:0061641	CENP-A containing chromatin organization
GO:0060688	0.57502	1.7135	0.554343	1.66709	0.550069	1.68043	BP	GO:0060688	regulation of morphogenesis of a branching structure
GO:0015103	-0.435205	-1.57378	-0.460272	-1.58201	-0.458053	-1.5785	MF	GO:0015103	inorganic anion transmembrane transporter activity
GO:0017022	-0.541053	-1.74398	-0.577405	-1.78726	-0.577214	-1.80342	MF	GO:0017022	myosin binding
GO:0008544	-0.338816	-1.36787	-0.451155	-1.7413	-0.499245	-1.9111	BP	GO:0008544	epidermis development
GO:0035173	0.769994	1.8307	0.753772	1.72328	0.761976	1.81364	MF	GO:0035173	histone kinase activity
GO:0008757	0.484079	1.61296	0.504211	1.70239	0.541818	1.83302	MF	GO:0008757	S-adenosylmethionine-dependent methyltransferase activity
GO:0010498	0.381818	1.45283	0.368293	1.42703	0.368628	1.43143	BP	GO:0010498	proteasomal protein catabolic process
GO:0045787	0.389188	1.458	0.365894	1.39907	0.381156	1.47168	BP	GO:0045787	positive regulation of cell cycle
GO:0043138	0.77232	1.84775	0.780734	1.81248	0.806186	1.95128	MF	GO:0043138	3'-5' DNA helicase activity
GO:0033209	0.458729	1.59499	0.48209	1.67436	0.43106	1.50437	BP	GO:0033209	tumor necrosis factor-mediated signaling pathway
GO:0032212	0.661771	1.76756	0.672437	1.80872	0.656825	1.78156	BP	GO:0032212	positive regulation of telomere maintenance via telomerase
GO:0031123	0.496131	1.64989	0.460736	1.54409	0.510588	1.73162	BP	GO:0031123	RNA 3'-end processing
GO:0010927	-0.462304	-1.60364	-0.486882	-1.62194	-0.500653	-1.66757	BP	GO:0010927	cellular component assembly involved in morphogenesis
GO:0030684	0.576324	1.73316	0.585231	1.79804	0.592582	1.81832	CC	GO:0030684	preribosome
GO:0016925	0.533511	1.67285	0.525787	1.64942	0.511493	1.6126	BP	GO:0016925	protein sumoylation
GO:0015179	0.595208	1.70899	0.635837	1.84893	0.60354	1.7649	MF	GO:0015179	L-amino acid transmembrane transporter activity
GO:0033627	0.562511	1.71357	0.561435	1.74584	0.562034	1.74207	BP	GO:0033627	cell adhesion mediated by integrin
GO:0007131	0.62697	1.72847	0.642282	1.78641	0.65795	1.86963	BP	GO:0007131	reciprocal meiotic recombination
GO:0035825	0.62697	1.72847	0.642282	1.78641	0.65795	1.86963	BP	GO:0035825	homologous recombination
GO:0070003	0.705038	1.81495	0.754445	1.95163	0.737253	1.95189	MF	GO:0070003	threonine-type peptidase activity
GO:0070268	-0.495225	-1.67936	-0.655348	-2.14565	-0.706033	-2.29577	BP	GO:0070268	cornification
GO:0034612	0.397121	1.46756	0.421588	1.56784	0.376185	1.42086	BP	GO:0034612	response to tumor necrosis factor
GO:0007569	0.49602	1.61967	0.510189	1.67802	0.523462	1.74229	BP	GO:0007569	cell aging
GO:2000779	0.572291	1.7129	0.558968	1.684	0.574955	1.75331	BP	GO:2000779	regulation of double-strand break repair
GO:0019373	-0.730074	-1.88316	-0.788716	-1.94458	-0.743625	-1.81764	BP	GO:0019373	epoxygenase P450 pathway
GO:0071007	0.671773	1.75917	0.66039	1.73417	0.698656	1.85088	CC	GO:0071007	U2-type catalytic step 2 spliceosome
GO:0042276	0.740012	1.80688	0.753839	1.80371	0.760833	1.90055	BP	GO:0042276	error-prone translesion synthesis
GO:0000077	0.468704	1.58855	0.463547	1.58723	0.498439	1.7088	BP	GO:0000077	DNA damage checkpoint
GO:0036297	0.631055	1.75185	0.656973	1.83831	0.690275	1.96201	BP	GO:0036297	interstrand cross-link repair
GO:0098661	-0.45485	-1.58244	-0.501304	-1.67616	-0.491801	-1.64782	BP	GO:0098661	inorganic anion transmembrane transport
GO:0004857	-0.3464	-1.38582	-0.386552	-1.48026	-0.418301	-1.59037	MF	GO:0004857	enzyme inhibitor activity
GO:0016796	0.582849	1.6735	0.614034	1.78553	0.600008	1.75457	MF	GO:0016796	exonuclease activity, active with either ribo- or deoxyribonucleic acids and producing 5'-phosphomonoesters
GO:1904031	0.658268	1.74512	0.688431	1.84153	0.728486	1.95595	BP	GO:1904031	positive regulation of cyclin-dependent protein kinase activity
GO:0006821	-0.464528	-1.60904	-0.522007	-1.73716	-0.500643	-1.65558	BP	GO:0006821	chloride transport
GO:0030894	0.694964	1.78901	0.689517	1.78367	0.704532	1.86526	CC	GO:0030894	replisome
GO:0051302	0.43687	1.50925	0.43885	1.52245	0.457782	1.59404	BP	GO:0051302	regulation of cell division
GO:1900180	0.467446	1.5625	0.47851	1.61567	0.497863	1.68906	BP	GO:1900180	regulation of protein localization to nucleus
GO:0000780	0.672073	1.74048	0.680225	1.77541	0.684852	1.81198	CC	GO:0000780	condensed nuclear chromosome, centromeric region
GO:0030239	-0.511418	-1.64936	-0.549605	-1.69052	-0.55695	-1.7308	BP	GO:0030239	myofibril assembly
GO:0006268	0.754181	1.76286	0.785107	1.76385	0.815304	1.90466	BP	GO:0006268	DNA unwinding involved in DNA replication
GO:0031994	0.764709	1.75016	0.763813	1.70422	0.790277	1.81752	MF	GO:0031994	insulin-like growth factor I binding
GO:0043414	0.393191	1.43083	0.386926	1.42956	0.414553	1.53069	BP	GO:0043414	macromolecule methylation
GO:0035404	0.781445	1.75305	0.798358	1.74227	0.862972	1.94655	BP	GO:0035404	histone-serine phosphorylation
GO:0032206	0.596747	1.6946	0.619715	1.78143	0.632005	1.83294	BP	GO:0032206	positive regulation of telomere maintenance
GO:0005254	-0.527893	-1.65315	-0.565162	-1.72456	-0.590262	-1.79187	MF	GO:0005254	chloride channel activity
GO:1904949	0.516725	1.6151	0.516013	1.61803	0.529042	1.66673	CC	GO:1904949	ATPase complex
GO:0008017	0.402341	1.44492	0.40953	1.49476	0.393257	1.43866	MF	GO:0008017	microtubule binding
